# Supplementary material for: Comparative Proteomic Analysis of Visceral Adipose Tissue in Morbidly Obese and Normal Weight Chinese Women
Source: Hindawi journal article supplement (doi:10.1155/2019/2302753), 2019-12-18
Supplement: f1 [file 2302753.f1.zip]

**Table S3 Correlation analysis of western blotting results and anthropometric/  
laboratory measurements**

|               | Western blotting results |         |         |         |        |         |
|---------------|--------------------------|---------|---------|---------|--------|---------|
|               | HADH                     |         | ACSL1   |         | UCHL1  |         |
|               | r                        | P value | r       | P value | r      | P value |
| <b>Age</b>    | 0.626                    | 0.053   | 0.536   | 0.110   | -0.066 | 0.857   |
| <b>Height</b> | 0.389                    | 0.266   | 0.196   | 0.588   | -0.251 | 0.484   |
| <b>Weight</b> | -0.515                   | 0.127   | -0.380  | 0.278   | 0.313  | 0.378   |
| <b>BMI</b>    | -0.579                   | 0.080   | -0.422  | 0.225   | 0.362  | 0.305   |
| <b>WC</b>     | -0.636*                  | 0.048   | -0.454  | 0.188   | 0.432  | 0.212   |
| <b>SBP</b>    | -0.010                   | 0.979   | -0.048  | 0.896   | 0.417  | 0.230   |
| <b>DBP</b>    | -0.123                   | 0.735   | -0.169  | 0.640   | 0.563  | 0.090   |
| <b>FBG</b>    | -0.363                   | 0.303   | -0.426  | 0.219   | 0.445  | 0.197   |
| <b>TC</b>     | 0.102                    | 0.780   | -0.034  | 0.925   | 0.148  | 0.684   |
| <b>TG</b>     | -0.568                   | 0.087   | -0.689* | 0.027   | 0.853* | 0.002   |
| <b>HDL</b>    | 0.765*                   | 0.010   | 0.715*  | 0.020   | -0.310 | 0.383   |
| <b>LDL</b>    | -0.260                   | 0.467   | -0.357  | 0.311   | 0.176  | 0.627   |

**r. Pearson's coefficient. \*p value<0.05.**

Abbreviations: BMI, body mass index; WC, waist circumference; SBP, systolic blood pressure; DBP, diastolic blood pressure; FBG, fasting blood glucose; TC, total cholesterol; TG, triglyceride; HDL-C, high density lipoprotein cholesterol; LDL-C, low density lipoprotein cholesterol; ACSL1, long-chain-fatty-acid-CoA ligase 1; HADH, hydroxyacyl-coenzyme A dehydrogenase; UCHL1, ubiquitin carboxyl-terminal hydrolase isozyme L1.
