# Supplementary material for: Comparative Proteomic Analysis of Visceral Adipose Tissue in Morbidly Obese and Normal Weight Chinese Women
Source: Hindawi journal article supplement (doi:10.1155/2019/2302753), 2019-12-18
Supplement: f1 [file 2302753.f1.zip]

**Table S2 The 124 differentially expressed VAT proteins between morbidly obese and normal weight subjects**

| Swiss-prot<br>accession<br>number | Gene<br>symbol | Name                                                              | Ratio(O/N)  | Style |
|-----------------------------------|----------------|-------------------------------------------------------------------|-------------|-------|
| 04271                             | S100B          | Protein S100-B                                                    | 0.147332273 | down  |
| Q86WU2                            | LDHD           | Probable D-lactate<br>dehydrogenase, mitochondrial                | 0.168476843 | down  |
| Q13085                            | ACACA          | Acetyl-CoA carboxylase 1                                          | 0.178573909 | down  |
| P61960                            | UFM1           | Ubiquitin-fold modifier 1                                         | 0.181188644 | down  |
| P49327                            | FASN           | Fatty acid synthase                                               | 0.18307047  | down  |
| P24298                            | GPT            | Alanine aminotransferase 1                                        | 0.208245037 | down  |
| P35749                            | MYH11          | Myosin-11                                                         | 0.246284001 | down  |
| P61604                            | HSPE1          | 10 kDa heat shock protein,<br>mitochondrial                       | 0.272970627 | down  |
| P11498                            | PC             | Pyruvate carboxylase,<br>mitochondrial                            | 0.273082068 | down  |
| P51911                            | CNN1           | Calponin-1                                                        | 0.273354388 | down  |
| Q9UD71                            | PPP1R1<br>B    | Protein phosphatase 1<br>regulatory subunit 1B                    | 0.281236999 | down  |
| P30837                            | ALDH1<br>B1    | Aldehyde dehydrogenase X,<br>mitochondrial                        | 0.288701859 | down  |
| Q14117                            | DPYS           | Dihydropyrimidinase                                               | 0.301388582 | down  |
| O15075                            | DCLK1          | Serine/threonine-protein<br>kinase DCLK1                          | 0.305100359 | down  |
| P23297                            | S100A1         | Protein S100-A1                                                   | 0.307875276 | down  |
| P99999                            | CYCS           | Cytochrome c                                                      | 0.315465993 | down  |
| Q9NVH6                            | TMLHE          | Trimethyllysine dioxygenase,<br>mitochondrial                     | 0.325505242 | down  |
| P21589                            | NT5E           | 5'-nucleotidase                                                   | 0.334139431 | down  |
| P12277                            | CKB            | Creatine kinase B-type                                            | 0.341811143 | down  |
| P07451                            | CA3            | Carbonic anhydrase 3                                              | 0.342863108 | down  |
| A4D1P6                            | WDR91          | WD repeat-containing protein<br>91                                | 0.34664244  | down  |
| Q01995                            | TAGLN          | Transgelin                                                        | 0.356222802 | down  |
| P30084                            | ECHS1          | Enoyl-CoA hydratase,<br>mitochondrial                             | 0.361462798 | down  |
| Q96AB3                            | ISOC2          | Isochorismatase domain-<br>containing protein 2,<br>mitochondrial | 0.370891294 | down  |

|        |          |                                                                                |             |      |
|--------|----------|--------------------------------------------------------------------------------|-------------|------|
| P08559 | PDHA1    | Pyruvate dehydrogenase E1 component subunit alpha, somatic form, mitochondrial | 0.371565161 | down |
| P24844 | MYL9     | Myosin regulatory light polypeptide 9                                          | 0.374458944 | down |
| Q01469 | FABP5    | Fatty acid-binding protein, epidermal                                          | 0.376171355 | down |
| Q16822 | PCK2     | Phosphoenolpyruvate carboxykinase GTP, mitochondrial                           | 0.380963014 | down |
| O00483 | NDUFA4   | NADH dehydrogenase ubiquinone 1 alpha subcomplex subunit 4                     | 0.382424637 | down |
| Q02252 | ALDH6A1  | Methylmalonate-semialdehyde dehydrogenase acylating, mitochondrial             | 0.385143747 | down |
| P32455 | GBP1     | Interferon-induced guanylate-binding protein 1                                 | 0.38599138  | down |
| Q63ZY3 | KANK2    | KN motif and ankyrin repeat domain-containing protein 2                        | 0.39544228  | down |
| P14927 | UQCRB    | Cytochrome b-c1 complex subunit 7                                              | 0.398552128 | down |
| Q05707 | COL14A1  | Collagen alpha-1(XIV) chain                                                    | 0.398758022 | down |
| P56385 | ATP5I    | ATP synthase subunit e, mitochondrial                                          | 0.400206252 | down |
| P42126 | ECI1     | Enoyl-CoA delta isomerase 1, mitochondrial                                     | 0.404033959 | down |
| Q9HCC0 | MCCC2    | Methylcrotonoyl-CoA carboxylase beta chain, mitochondrial                      | 0.407064319 | down |
| Q16836 | HADH     | Hydroxyacyl-coenzyme A dehydrogenase, mitochondrial                            | 0.4118854   | down |
| P21291 | CSRP1    | Cysteine and glycine-rich protein 1                                            | 0.414037406 | down |
| P33121 | ACSL1    | Long-chain-fatty-acid--CoA ligase 1                                            | 0.414279112 | down |
| Q76LX8 | ADAMTS13 | A disintegrin and metalloproteinase with thrombospondin motifs 13              | 0.420590654 | down |
| Q9BX68 | HINT2    | Histidine triad nucleotide-binding protein 2, mitochondrial                    | 0.425592624 | down |

|        |         |                                                                    |             |      |
|--------|---------|--------------------------------------------------------------------|-------------|------|
| O43143 | DHX15   | Putative pre-mRNA-splicing factor ATP-dependent RNA helicase DHX15 | 0.427703843 | down |
| Q7Z434 | MAVS    | Mitochondrial antiviral-signaling protein                          | 0.428256467 | down |
| Q8NC51 | SERBP1  | Plasminogen activator inhibitor 1 RNA-binding protein              | 0.432337657 | down |
| Q96C23 | GALM    | Aldose 1-epimerase                                                 | 0.432565543 | down |
| Q6YN16 | HSDL2   | Hydroxysteroid dehydrogenase-like protein 2                        | 0.434080867 | down |
| Q13188 | STK3    | Serine/threonine-protein kinase 3                                  | 0.434094602 | down |
| P55010 | EIF5    | Eukaryotic translation initiation factor 5                         | 0.435053867 | down |
| Q86TX2 | ACOT1   | Acyl-coenzyme A thioesterase 1                                     | 0.438509374 | down |
| Q96DC8 | ECHDC3  | Enoyl-CoA hydratase domain-containing protein 3, mitochondrial     | 0.440493665 | down |
| P53597 | SUCLG1  | Succinyl-CoA ligase ADP/GDP-forming subunit alpha, mitochondrial   | 0.441446251 | down |
| P00325 | ADH1B   | Alcohol dehydrogenase 1B                                           | 0.444440705 | down |
| P17931 | LGALS3  | Galectin-3                                                         | 0.446655756 | down |
| P16070 | CD44    | CD44 antigen                                                       | 0.447567406 | down |
| O43294 | TGFB1I1 | Transforming growth factor beta-1-induced transcript 1 protein     | 0.448881632 | down |
| P62081 | RPS7    | 40S ribosomal protein S7                                           | 0.45039184  | down |
| P08195 | SLC3A2  | 4F2 cell-surface antigen heavy chain                               | 0.453354191 | down |
| P68036 | UBE2L3  | Ubiquitin-conjugating enzyme E2 L3                                 | 0.453382906 | down |
| Q92945 | KHSRP   | Far upstream element-binding protein 2                             | 0.456573891 | down |
| Q6P2I3 | FAHD2B  | Fumarylacetoacetate hydrolase domain-containing protein 2B         | 0.460174064 | down |
| Q14980 | NUMA1   | Nuclear mitotic apparatus protein 1                                | 0.460993453 | down |
| P09493 | TPM1    | Tropomyosin alpha-1 chain                                          | 0.461845707 | down |

|        |                                 |                                                                 |             |      |
|--------|---------------------------------|-----------------------------------------------------------------|-------------|------|
| Q02127 | DHODH                           | Dihydroorotate dehydrogenase (quinone), mitochondrial           | 0.462273586 | down |
| O43175 | PHGDH                           | D-3-phosphoglycerate dehydrogenase                              | 0.463186399 | down |
| P68402 | PAFAH1B2                        | Platelet-activating factor acetylhydrolase IB subunit beta      | 0.463406178 | down |
| O75208 | COQ9                            | Ubiquinone biosynthesis protein COQ9, mitochondrial             | 0.464233254 | down |
| P11177 | PDHB                            | Pyruvate dehydrogenase E1 component subunit beta, mitochondrial | 0.464631415 | down |
| O95394 | PGM3                            | Phosphoacetylglucosamine mutase                                 | 0.465669995 | down |
| P09429 | HMGB1                           | High mobility group protein B1                                  | 0.466191665 | down |
| P13804 | ETFA                            | Electron transfer flavoprotein subunit alpha, mitochondrial     | 0.467319105 | down |
| Q7Z4W1 | DCXR                            | L-xylulose reductase                                            | 0.478036298 | down |
| P14174 | MIF                             | Macrophage migration inhibitory factor                          | 0.484755952 | down |
| P41567 | EIF1                            | Eukaryotic translation initiation factor 1                      | 0.48589058  | down |
| P12694 | BCKDH A                         | 2-oxoisovalerate dehydrogenase subunit alpha, mitochondrial     | 0.486778751 | down |
| Q96FV2 | SCRN2                           | Secernin-2                                                      | 0.488518863 | down |
| P05166 | PCCB                            | Propionyl-CoA carboxylase beta chain, mitochondrial             | 0.488799632 | down |
| O75390 | CS                              | Citrate synthase, mitochondrial                                 | 0.4891423   | down |
| Q8IY63 | AMOTL1                          | Angiomotin-like protein 1                                       | 0.489881728 | down |
| O15247 | CLIC2                           | Chloride intracellular channel protein 2                        | 0.495709921 | down |
| Q14118 | DAG1                            | Dystroglycan                                                    | 0.497870577 | down |
| P00966 | ASS1                            | Argininosuccinate synthase                                      | 0.498373993 | down |
| P40926 | MDH2                            | Malate dehydrogenase, mitochondrial                             | 0.498930212 | down |
| P01766 | Ig heavy chain V-III region BRO | Ig heavy chain V-III region BRO                                 | 2.014026303 | up   |

|        |                                         |                                                             |             |    |
|--------|-----------------------------------------|-------------------------------------------------------------|-------------|----|
| P02747 | C1QC                                    | Complement C1q subcomponent subunit C                       | 2.019800839 | up |
| O76070 | SNCG                                    | Gamma-synuclein                                             | 2.026450854 | up |
| P04114 | APOB                                    | Apolipoprotein B-100                                        | 2.028866497 | up |
| P02751 | FN1                                     | Fibronectin                                                 | 2.030956781 | up |
| P11277 | SPTB                                    | Spectrin beta chain, erythrocytic                           | 2.034775214 | up |
| P02788 | LTF                                     | Lactotransferrin                                            | 2.057043651 | up |
| P61626 | LYZ                                     | Lysozyme C                                                  | 2.067956606 | up |
| P01876 | IGHA1                                   | Ig alpha-1 chain C region                                   | 2.098518872 | up |
| P01877 | IGHA2                                   | Ig alpha-2 chain C region                                   | 2.105459061 | up |
| Q13620 | CUL4B                                   | Cullin-4B                                                   | 2.182249748 | up |
| P02679 | FGG                                     | Fibrinogen gamma chain                                      | 2.202826065 | up |
| P51636 | CAV2                                    | Caveolin-2                                                  | 2.267193486 | up |
| Q13434 | MKRN4<br>P                              | Putative E3 ubiquitin-protein ligase makorin-4              | 2.281286946 | up |
| P43626 | KIR2D<br>L1                             | Killer cell immunoglobulin-like receptor 2DL1               | 2.303471773 | up |
| P05164 | MPO                                     | Myeloperoxidase                                             | 2.357126718 | up |
| P02792 | FTL                                     | Ferritin light chain                                        | 2.388003798 | up |
| P02675 | FGB                                     | Fibrinogen beta chain                                       | 2.414039455 | up |
| P0C0L4 | C4A                                     | Complement C4-A                                             | 2.422223056 | up |
| P01911 | HLA-<br>DRB1                            | HLA class II histocompatibility antigen, DRB1-15 beta chain | 2.46175602  | up |
| P01814 | Ig heavy<br>chain V-<br>II region<br>OU | Ig heavy chain V-II region OU                               | 2.475359729 | up |
| P04259 | KRT6B                                   | Keratin, type II cytoskeletal 6B                            | 2.533243095 | up |
| P0C0L5 | C4B                                     | Complement C4-B                                             | 2.579543693 | up |
| Q9UIF7 | MUTY<br>H                               | A/G-specific adenine DNA glycosylase                        | 2.588527071 | up |
| P05109 | S100A8                                  | Protein S100-A8                                             | 2.668429849 | up |
| P09936 | UCHL1                                   | Ubiquitin carboxyl-terminal hydrolase isozyme L1            | 2.749541842 | up |
| P06702 | S100A9                                  | Protein S100-A9                                             | 2.774986439 | up |
| P15559 | NQO1                                    | NAD(P)H dehydrogenase quinone 1                             | 2.829538719 | up |
| P08123 | COL1A<br>2                              | Collagen alpha-2(I) chain                                   | 2.857271519 | up |
| P23141 | CES1                                    | Liver carboxylesterase 1                                    | 2.992110681 | up |

|        |       |                                            |             |    |
|--------|-------|--------------------------------------------|-------------|----|
| P08779 | KRT16 | Keratin, type I cytoskeletal 16            | 2.999859174 | up |
| Q92781 | RDH5  | 11-cis retinol dehydrogenase               | 3.204484525 | up |
| Q13586 | STIM1 | Stromal interaction molecule 1             | 3.339665768 | up |
| P02511 | CRYAB | Alpha-crystallin B chain                   | 3.424798843 | up |
| P20160 | AZU1  | Azurocidin                                 | 3.530126213 | up |
| Q969L2 | MAL2  | Protein MAL2                               | 3.670527105 | up |
| O75367 | H2AFY | Core histone macro-H2A.1                   | 4.314654909 | up |
| P80188 | LCN2  | Neutrophil gelatinase-associated lipocalin | 4.371978082 | up |
| P14780 | MMP9  | Matrix metalloproteinase-9                 | 4.658424541 | up |
| P02144 | MB    | Myoglobin                                  | 4.661746864 | up |
| P06732 | CKM   | Creatine kinase M-type                     | 7.392532524 | up |

Abbreviations: O/N: Obese/ Normal weight
