# Supplementary material for: Comparative Proteomic Analysis of Visceral Adipose Tissue in Morbidly Obese and Normal Weight Chinese Women
Source: Int J Endocrinol. 2019 Dec 18;2019:2302753. doi: 10.1155/2019/2302753 (PMC6935805; doi:10.1155/2019/2302753)
Supplement: Supplementary Materials — Table S1: scaffold reports for proteins in VAT identified by label-free 1D-LC-MS/MS. Table S2: the 124 differentially expressed VAT proteins between morbidly obese and normal weight subjects. Figure S1: LXR/RXR signaling pathway with participating proteins. Figure S2: acute phase response signaling pathway with participating proteins. Table S3: correlation analysis of western blotting results and anthropometric/laboratory measurements. [file 2302753.f1.zip]

Archive with 15 entries (12 files):
- Supplementary Materials/
- Supplementary Materials/.DS_Store
- __MACOSX/
- __MACOSX/Supplementary Materials/
- __MACOSX/Supplementary Materials/._.DS_Store
- Supplementary Materials/Table S1.xls
- __MACOSX/Supplementary Materials/._Table S1.xls
- Supplementary Materials/Table S2.pdf
- __MACOSX/Supplementary Materials/._Table S2.pdf
- Supplementary Materials/Table S3.pdf
- __MACOSX/Supplementary Materials/._Table S3.pdf
- Supplementary Materials/Figure S1.pdf
- __MACOSX/Supplementary Materials/._Figure S1.pdf
- Supplementary Materials/Figure S2.pdf
- __MACOSX/Supplementary Materials/._Figure S2.pdf
