# Supplementary material for: Comparative Proteomic Analysis of Visceral Adipose Tissue in Morbidly Obese and Normal Weight Chinese Women
Source: Int J Endocrinol. 2019 Dec 18;2019:2302753. doi: 10.1155/2019/2302753 (PMC6935805; doi:10.1155/2019/2302753)
Supplement: Supplementary Materials — Table S1: scaffold reports for proteins in VAT identified by label-free 1D-LC-MS/MS. Table S2: the 124 differentially expressed VAT proteins between morbidly obese and normal weight subjects. Figure S1: LXR/RXR signaling pathway with participating proteins. Figure S2: acute phase response signaling pathway with participating proteins. Table S3: correlation analysis of western blotting results and anthropometric/laboratory measurements. [file 2302753.f1.zip › Supplementary Materials/Table S1.xls]

## Sheet: Quantitative Proteins Report
Table S1: Scaffold reports for proteins in VAT identified by label free 1D-LC-MS/MS
Accession	Peptide count	Peptides used for quantitation	Confidence score	Anova (p)	Max fold change	Highest mean condition	Lowest mean condition	Description	N1	N2	N3	N	CV	OB1	OB2	OB3	OB	CV	ratio	Ftest	ttest	Log2 (OB/N)	-Log2(p-value)
P35749	24	17	1664.31	7.39336e-07	4.06035	Condition 1	Condition 2	Myosin-11 OS=Homo sapiens GN=MYH11 PE=1 SV=3	2.2277e+08	2.25494e+08	2.27672e+08	2.25312e+08	0.0108995	5.34081e+07	5.82207e+07	5.48434e+07	5.54907e+07	0.0445256	0.246284	0.993926	1.17938e-07	-2.02161	23.0155
Q53GQ0	3	3	47.31	2.28529e-06	1.75574	Condition 1	Condition 2	Estradiol 17-beta-dehydrogenase 12 OS=Homo sapiens GN=HSD17B12 PE=1 SV=2	5.90833e+07	5.89284e+07	5.92544e+07	5.90887e+07	0.00275918	3.44805e+07	3.36243e+07	3.28587e+07	3.36545e+07	0.0241072	0.569559	0.0776291	7.45355e-07	-0.812083	20.3556
P38117	11	11	436.29	1.06401e-06	1.88575	Condition 1	Condition 2	Electron transfer flavoprotein subunit beta OS=Homo sapiens GN=ETFB PE=1 SV=3	4.01828e+08	3.96696e+08	4.07055e+08	4.01859e+08	0.0128891	2.14534e+08	2.16117e+08	2.08659e+08	2.13103e+08	0.0184376	0.530294	0.730514	9.35729e-07	-0.915136	20.0274
O15247	2	2	109.54	2.15076e-06	2.01731	Condition 1	Condition 2	Chloride intracellular channel protein 2 OS=Homo sapiens GN=CLIC2 PE=1 SV=3	1.66968e+07	1.70625e+07	1.6952e+07	1.69037e+07	0.0110953	8.62725e+06	8.34375e+06	8.16705e+06	8.37935e+06	0.0277054	0.49571	0.789834	9.98955e-07	-1.01243	19.9331
Q9HDC9	8	8	467.23	5.85812e-07	1.83507	Condition 1	Condition 2	Adipocyte plasma membrane-associated protein OS=Homo sapiens GN=APMAP PE=1 SV=2	6.66564e+08	6.57867e+08	6.7799e+08	6.67473e+08	0.0151203	3.59727e+08	3.6761e+08	3.63858e+08	3.63732e+08	0.0108409	0.544938	0.264872	1.07657e-06	-0.875835	19.8251
Q16134	6	6	331.06	2.08808e-06	1.70757	Condition 1	Condition 2	Electron transfer flavoprotein-ubiquinone oxidoreductase, mitochondrial OS=Homo sapiens GN=ETFDH PE=1 SV=2	5.83576e+07	5.9138e+07	5.94373e+07	5.89776e+07	0.00945132	3.53531e+07	3.40473e+07	3.42161e+07	3.45388e+07	0.0205622	0.585626	0.762402	1.2379e-06	-0.771949	19.6237
P06702	4	4	323.8	4.20087e-06	2.77499	Condition 2	Condition 1	Protein S100-A9 OS=Homo sapiens GN=S100A9 PE=1 SV=1	2.55312e+08	2.80777e+08	2.64096e+08	2.66728e+08	0.0484956	7.54255e+08	7.37384e+08	7.28864e+08	7.40168e+08	0.0174589	2.77499	0.999021	1.47811e-06	1.47248	19.3678
Q9HCC0	1	1	113.43	3.96042e-06	2.45661	Condition 1	Condition 2	Methylcrotonoyl-CoA carboxylase beta chain, mitochondrial OS=Homo sapiens GN=MCCC2 PE=1 SV=1	8.2268e+06	7.9804e+06	7.99031e+06	8.06584e+06	0.0172936	3.44051e+06	3.20547e+06	3.20396e+06	3.28332e+06	0.0414626	0.407064	0.975678	1.83233e-06	-1.29667	19.0579
P21589	2	2	41.71	3.01853e-05	2.99276	Condition 1	Condition 2	5'-nucleotidase OS=Homo sapiens GN=NT5E PE=1 SV=1	5.91364e+06	5.88182e+06	6.01959e+06	5.93835e+06	0.0121468	1.78973e+06	2.0369e+06	2.12609e+06	1.98424e+06	0.0878184	0.334139	0.292578	3.43253e-06	-1.58148	18.1523
P15090	11	11	978.85	6.04184e-06	1.47074	Condition 1	Condition 2	Fatty acid-binding protein, adipocyte OS=Homo sapiens GN=FABP4 PE=1 SV=3	1.70147e+10	1.6634e+10	1.68962e+10	1.68483e+10	0.0115626	1.1678e+10	1.12772e+10	1.14116e+10	1.14556e+10	0.0178066	0.679928	0.954007	4.95974e-06	-0.556546	17.6213
O75367	1	1	41.56	8.14311e-05	4.31465	Condition 2	Condition 1	Core histone macro-H2A.1 OS=Homo sapiens GN=H2AFY PE=1 SV=4	1.3344e+06	1.78856e+06	1.67403e+06	1.59899e+06	0.147715	7.04436e+06	6.7229e+06	6.93005e+06	6.8991e+06	0.0236194	4.31465	0.644965	5.69093e-06	2.10925	17.4229
P02788	12	12	715.09	4.26202e-06	2.05704	Condition 2	Condition 1	Lactotransferrin OS=Homo sapiens GN=LTF PE=1 SV=6	1.43635e+08	1.40412e+08	1.47795e+08	1.43947e+08	0.0257139	3.04804e+08	2.90406e+08	2.93108e+08	2.96106e+08	0.0258445	2.05704	0.379181	6.45015e-06	1.04057	17.2422
Q07960	3	3	197.2	6.58183e-06	1.2969	Condition 1	Condition 2	Rho GTPase-activating protein 1 OS=Homo sapiens GN=ARHGAP1 PE=1 SV=1	8.31747e+07	8.38998e+07	8.53528e+07	8.41424e+07	0.0131816	6.44527e+07	6.52704e+07	6.49155e+07	6.48795e+07	0.00632026	0.771068	0.240497	9.38876e-06	-0.37507	16.7006
Q86TX2	6	6	544.73	2.85833e-06	2.28045	Condition 1	Condition 2	Acyl-coenzyme A thioesterase 1 OS=Homo sapiens GN=ACOT1 PE=1 SV=1	3.31081e+08	3.2733e+08	3.49297e+08	3.35903e+08	0.0349815	1.45244e+08	1.47173e+08	1.49473e+08	1.47297e+08	0.0143744	0.438509	0.0628944	1.06118e-05	-1.18932	16.524
P23141	17	16	1226.64	5.58328e-05	2.99211	Condition 2	Condition 1	Liver carboxylesterase 1 OS=Homo sapiens GN=CES1 PE=1 SV=2	4.89074e+08	5.01289e+08	5.91062e+08	5.27142e+08	0.10565	1.61263e+09	1.53777e+09	1.5814e+09	1.57727e+09	0.0238385	2.99211	0.626185	1.10763e-05	1.58116	16.4622
P80188	4	4	231.31	3.25813e-06	4.37198	Condition 2	Condition 1	Neutrophil gelatinase-associated lipocalin OS=Homo sapiens GN=LCN2 PE=1 SV=2	3.42408e+07	3.26187e+07	3.59726e+07	3.42774e+07	0.048932	1.56804e+08	1.42161e+08	1.50614e+08	1.4986e+08	0.0490476	4.37198	0.0989874	1.19549e-05	2.12829	16.352
P61960	1	1	52.51	3.04734e-06	5.51911	Condition 1	Condition 2	Ubiquitin-fold modifier 1 OS=Homo sapiens GN=UFM1 PE=1 SV=1	8.08371e+06	7.28316e+06	7.60347e+06	7.65678e+06	0.0526235	1.3003e+06	1.46196e+06	1.39971e+06	1.38732e+06	0.0587746	0.181189	0.078683	1.22072e-05	-2.46444	16.3219
P02671	16	16	1403.27	1.94194e-05	1.60171	Condition 2	Condition 1	Fibrinogen alpha chain OS=Homo sapiens GN=FGA PE=1 SV=2	1.51675e+09	1.44621e+09	1.52378e+09	1.49558e+09	0.0286858	2.4452e+09	2.38719e+09	2.35407e+09	2.39549e+09	0.0192571	1.60171	0.927574	1.58369e-05	0.679615	15.9464
P04114	58	58	3369.67	2.40316e-05	2.02887	Condition 2	Condition 1	Apolipoprotein B-100 OS=Homo sapiens GN=APOB PE=1 SV=2	1.05629e+09	1.01438e+09	1.11569e+09	1.06212e+09	0.0479291	2.2217e+09	2.10863e+09	2.13438e+09	2.15491e+09	0.0275013	2.02887	0.849173	1.72195e-05	1.02067	15.8256
Q13085	6	3	266.61	3.21999e-06	5.59992	Condition 1	Condition 2	Acetyl-CoA carboxylase 1 OS=Homo sapiens GN=ACACA PE=1 SV=2	1.21678e+07	1.2742e+07	1.3651e+07	1.28536e+07	0.0581833	2.38373e+06	2.3531e+06	2.14912e+06	2.29531e+06	0.0555627	0.178574	0.0565181	1.75695e-05	-2.48541	15.7966
Q9BWD1	2	2	80.42	2.65391e-05	1.92298	Condition 1	Condition 2	Acetyl-CoA acetyltransferase, cytosolic OS=Homo sapiens GN=ACAT2 PE=1 SV=2	1.8718e+07	1.91105e+07	1.97517e+07	1.91934e+07	0.0271869	1.0096e+07	9.49413e+06	1.03531e+07	9.98107e+06	0.0441687	0.520026	0.832984	1.99112e-05	-0.943344	15.6161
O15488	1	1	71.19	5.927e-05	1.96005	Condition 1	Condition 2	Glycogenin-2 OS=Homo sapiens GN=GYG2 PE=1 SV=2	2.34616e+07	2.28533e+07	2.27822e+07	2.30324e+07	0.0162131	1.26191e+07	1.14374e+07	1.11964e+07	1.17509e+07	0.0647943	0.510192	0.387801	2.10222e-05	-0.970887	15.5377
Q05707	21	21	1276.84	2.72267e-05	2.50779	Condition 1	Condition 2	Collagen alpha-1(XIV) chain OS=Homo sapiens GN=COL14A1 PE=1 SV=3	6.78282e+08	6.91653e+08	7.28565e+08	6.995e+08	0.0372314	2.98934e+08	2.63944e+08	2.73916e+08	2.78931e+08	0.0646245	0.398758	0.647796	2.11772e-05	-1.32641	15.5271
P49591	4	4	218.92	4.2065e-05	1.43027	Condition 1	Condition 2	Serine--tRNA ligase, cytoplasmic OS=Homo sapiens GN=SARS PE=1 SV=3	2.44527e+07	2.45318e+07	2.42927e+07	2.44258e+07	0.00498645	1.76487e+07	1.65698e+07	1.70147e+07	1.70777e+07	0.0317499	0.699169	0.0960696	2.15363e-05	-0.516287	15.5029
P04271	2	2	131.57	0.000419071	6.78738	Condition 1	Condition 2	Protein S100-B OS=Homo sapiens GN=S100B PE=1 SV=2	1.81004e+07	1.9447e+07	1.76581e+07	1.84018e+07	0.0506366	3.06239e+06	3.22476e+06	1.84641e+06	2.71118e+06	0.277851	0.147332	0.790493	2.23812e-05	-2.76285	15.4474
P01024	58	58	5014.79	6.09174e-05	1.84194	Condition 2	Condition 1	Complement C3 OS=Homo sapiens GN=C3 PE=1 SV=2	5.71312e+09	6.06552e+09	6.41722e+09	6.06529e+09	0.0580435	1.1372e+10	1.10814e+10	1.10622e+10	1.11719e+10	0.0155373	1.84194	0.391126	2.29686e-05	0.881226	15.41
P02144	1	1	78.87	6.10986e-05	4.66175	Condition 2	Condition 1	Myoglobin OS=Homo sapiens GN=MB PE=1 SV=2	2.24741e+07	1.69144e+07	1.99315e+07	1.97734e+07	0.140758	8.79116e+07	9.11444e+07	9.74791e+07	9.21784e+07	0.052798	4.66175	0.492895	2.36499e-05	2.22087	15.3678
P02675	20	20	1984.69	0.000167193	2.41404	Condition 2	Condition 1	Fibrinogen beta chain OS=Homo sapiens GN=FGB PE=1 SV=2	1.38334e+09	1.61812e+09	1.71555e+09	1.57234e+09	0.108611	3.83321e+09	3.72727e+09	3.82658e+09	3.79569e+09	0.015635	2.41404	0.215502	2.87232e-05	1.27145	15.0874
P55084	14	14	547.88	4.44234e-05	1.62506	Condition 1	Condition 2	Trifunctional enzyme subunit beta, mitochondrial OS=Homo sapiens GN=HADHB PE=1 SV=3	4.05379e+08	4.16931e+08	4.22264e+08	4.14858e+08	0.0208055	2.65833e+08	2.53962e+08	2.46068e+08	2.55287e+08	0.0389716	0.615361	0.858876	3.04831e-05	-0.700494	15.0016
O43175	13	13	949.95	2.82803e-05	2.15896	Condition 1	Condition 2	D-3-phosphoglycerate dehydrogenase OS=Homo sapiens GN=PHGDH PE=1 SV=4	8.57471e+08	8.21223e+08	8.86855e+08	8.55183e+08	0.0384432	3.94989e+08	3.77249e+08	4.16088e+08	3.96109e+08	0.0490866	0.463186	0.518281	3.14606e-05	-1.11034	14.9561
Q9UD71	1	1	81.15	1.52771e-05	3.55572	Condition 1	Condition 2	Protein phosphatase 1 regulatory subunit 1B OS=Homo sapiens GN=PPP1R1B PE=1 SV=2	2.04767e+07	2.12747e+07	1.89612e+07	2.02375e+07	0.0580664	6.12936e+06	5.4435e+06	5.50177e+06	5.69154e+06	0.0668153	0.281237	0.189594	3.41072e-05	-1.83014	14.8396
P02511	8	8	603.94	8.24614e-06	3.4248	Condition 2	Condition 1	Alpha-crystallin B chain OS=Homo sapiens GN=CRYAB PE=1 SV=2	5.45976e+08	5.62413e+08	5.92763e+08	5.6705e+08	0.0418584	1.81153e+09	1.98663e+09	2.02793e+09	1.94203e+09	0.0591585	3.4248	0.0818724	3.47638e-05	1.77602	14.8121
P61604	2	2	127.94	0.000224197	3.6634	Condition 1	Condition 2	10 kDa heat shock protein, mitochondrial OS=Homo sapiens GN=HSPE1 PE=1 SV=2	2.08958e+08	1.91481e+08	2.02367e+08	2.00935e+08	0.0439257	5.97946e+07	4.44711e+07	6.02826e+07	5.48494e+07	0.163925	0.272971	0.981485	3.62847e-05	-1.87318	14.7503
Q07021	3	3	226.25	1.46354e-05	1.95617	Condition 1	Condition 2	Complement component 1 Q subcomponent-binding protein, mitochondrial OS=Homo sapiens GN=C1QBP PE=1 SV=1	8.97997e+07	9.71282e+07	9.56167e+07	9.41815e+07	0.0410833	4.80358e+07	4.91537e+07	4.72478e+07	4.81458e+07	0.0198916	0.511202	0.115452	3.68549e-05	-0.968035	14.7278
P49411	11	11	773.02	1.3159e-05	1.96616	Condition 1	Condition 2	Elongation factor Tu, mitochondrial OS=Homo sapiens GN=TUFM PE=1 SV=2	3.08303e+08	3.28814e+08	3.33838e+08	3.23652e+08	0.0417964	1.67347e+08	1.62125e+08	1.64362e+08	1.64611e+08	0.0159145	0.508606	0.0722957	3.69415e-05	-0.97538	14.7244
P35579	53	44	4649.83	3.56581e-05	1.65926	Condition 1	Condition 2	Myosin-9 OS=Homo sapiens GN=MYH9 PE=1 SV=4	2.24774e+09	2.34245e+09	2.37543e+09	2.32187e+09	0.0285464	1.45094e+09	1.36261e+09	1.38449e+09	1.39935e+09	0.0328723	0.60268	0.650151	3.83441e-05	-0.730536	14.6706
P30419	1	1	82.61	3.72151e-05	1.27069	Condition 1	Condition 2	Glycylpeptide N-tetradecanoyltransferase 1 OS=Homo sapiens GN=NMT1 PE=1 SV=2	3.69969e+06	3.74037e+06	3.62575e+06	3.6886e+06	0.0157528	2.8814e+06	2.87879e+06	2.94833e+06	2.90284e+06	0.0135802	0.786975	0.630396	4.17657e-05	-0.34561	14.5473
P56385	1	1	24.35	1.51899e-05	2.49871	Condition 1	Condition 2	ATP synthase subunit e, mitochondrial OS=Homo sapiens GN=ATP5I PE=1 SV=2	1.52958e+07	1.52578e+07	1.66872e+07	1.57469e+07	0.0517269	6.40422e+06	6.0332e+06	6.46866e+06	6.30203e+06	0.0372947	0.400206	0.153719	4.25103e-05	-1.32118	14.5218
Q9UKM9	1	1	34.98	0.00224459	6.0539	Condition 1	Condition 2	RNA-binding protein Raly OS=Homo sapiens GN=RALY PE=1 SV=1	1.54284e+06	1.63744e+06	1.65934e+06	1.61321e+06	0.0383779	338882	146741	313800	266474	0.391961	0.165183	0.520005	4.32624e-05	-2.59786	14.4965
P01814	1	1	25.54	0.00014989	2.47536	Condition 2	Condition 1	Ig heavy chain V-II region OU OS=Homo sapiens PE=1 SV=1	8.76822e+06	1.0222e+07	1.0778e+07	9.92272e+06	0.104584	2.42681e+07	2.55025e+07	2.39164e+07	2.45623e+07	0.0339126	2.47536	0.78366	4.46877e-05	1.30764	14.4498
P08727	15	10	746.39	4.2837e-05	1.30605	Condition 1	Condition 2	Keratin, type I cytoskeletal 19 OS=Homo sapiens GN=KRT19 PE=1 SV=4	6.32913e+08	6.2151e+08	6.42891e+08	6.32438e+08	0.0169157	4.88705e+08	4.89242e+08	4.74766e+08	4.84238e+08	0.0169478	0.765668	0.740926	4.48497e-05	-0.385208	14.4445
O76070	3	3	184.63	9.30002e-05	2.02645	Condition 2	Condition 1	Gamma-synuclein OS=Homo sapiens GN=SNCG PE=1 SV=2	5.24256e+07	4.85357e+07	5.58459e+07	5.22691e+07	0.0699762	1.06371e+08	1.02289e+08	1.09102e+08	1.05921e+08	0.0323684	2.02645	0.935403	4.98502e-05	1.01896	14.292
Q9P0V9	2	2	134.21	5.15112e-05	1.40574	Condition 1	Condition 2	Septin-10 OS=Homo sapiens GN=SEPT10 PE=1 SV=2	1.54935e+07	1.60381e+07	1.60831e+07	1.58716e+07	0.0206768	1.16114e+07	1.11353e+07	1.11251e+07	1.12906e+07	0.0246078	0.711371	0.83501	5.07509e-05	-0.491326	14.2662
P04264	19	16	1570.91	6.18504e-05	1.71144	Condition 2	Condition 1	Keratin, type II cytoskeletal 1 OS=Homo sapiens GN=KRT1 PE=1 SV=6	7.98322e+08	7.37392e+08	7.92073e+08	7.75929e+08	0.0431999	1.3641e+09	1.28546e+09	1.33431e+09	1.32796e+09	0.0299009	1.71144	0.832215	5.13295e-05	0.775212	14.2499
P55010	1	1	45.33	0.000115733	2.29857	Condition 1	Condition 2	Eukaryotic translation initiation factor 5 OS=Homo sapiens GN=EIF5 PE=1 SV=2	6.23206e+06	6.24753e+06	5.83822e+06	6.10594e+06	0.0379921	2.71472e+06	2.85255e+06	2.40196e+06	2.65641e+06	0.0869157	0.435054	0.995276	5.2964e-05	-1.20073	14.2046
P02679	16	15	1130.66	5.23838e-05	2.20283	Condition 2	Condition 1	Fibrinogen gamma chain OS=Homo sapiens GN=FGG PE=1 SV=3	1.53438e+09	1.38661e+09	1.53036e+09	1.48378e+09	0.0567327	3.33299e+09	3.09352e+09	3.37902e+09	3.26851e+09	0.046896	2.20283	0.463433	6.01601e-05	1.13936	14.0208
P31150	11	7	780.91	4.04829e-05	1.53764	Condition 1	Condition 2	Rab GDP dissociation inhibitor alpha OS=Homo sapiens GN=GDI1 PE=1 SV=2	1.65002e+08	1.63867e+08	1.73474e+08	1.67448e+08	0.0313491	1.08207e+08	1.11584e+08	1.06907e+08	1.08899e+08	0.0221705	0.650347	0.349207	6.18862e-05	-0.620718	13.98
Q06323	8	8	308.45	5.53811e-05	1.28594	Condition 1	Condition 2	Proteasome activator complex subunit 1 OS=Homo sapiens GN=PSME1 PE=1 SV=1	2.07607e+08	2.02374e+08	2.10463e+08	2.06815e+08	0.0198349	1.62234e+08	1.6194e+08	1.58308e+08	1.60827e+08	0.013597	0.777638	0.442575	6.80523e-05	-0.362829	13.843
Q14980	2	2	50.44	0.000249356	2.16923	Condition 1	Condition 2	Nuclear mitotic apparatus protein 1 OS=Homo sapiens GN=NUMA1 PE=1 SV=2	1.0456e+07	1.08582e+07	1.0887e+07	1.07337e+07	0.022452	4.73618e+06	4.54398e+06	5.56439e+06	4.94818e+06	0.109582	0.460993	0.3299	7.20716e-05	-1.11718	13.7602
Q9ULA0	3	3	84.38	0.00020608	1.70338	Condition 1	Condition 2	Aspartyl aminopeptidase OS=Homo sapiens GN=DNPEP PE=1 SV=1	3.20981e+07	3.16006e+07	3.15892e+07	3.17626e+07	0.00914738	1.99576e+07	1.73183e+07	1.86647e+07	1.86469e+07	0.0707738	0.587069	0.0924579	7.3381e-05	-0.768397	13.7342
P31040	5	5	235.93	5.19071e-05	1.41393	Condition 1	Condition 2	Succinate dehydrogenase [ubiquinone] flavoprotein subunit, mitochondrial OS=Homo sapiens GN=SDHA PE=1 SV=2	1.75706e+08	1.72079e+08	1.81844e+08	1.76543e+08	0.0279595	1.23828e+08	1.2343e+08	1.27321e+08	1.24859e+08	0.0171485	0.707247	0.316731	7.64517e-05	-0.499714	13.6751
Q9BUP0	1	1	51.48	7.41938e-05	1.41927	Condition 1	Condition 2	EF-hand domain-containing protein D1 OS=Homo sapiens GN=EFHD1 PE=1 SV=1	6.49849e+06	6.42681e+06	6.19364e+06	6.37298e+06	0.0250111	4.36655e+06	4.50688e+06	4.59757e+06	4.49033e+06	0.0259215	0.704589	0.695577	7.86001e-05	-0.505146	13.6351
P01877	8	2	789.75	0.00016574	2.10546	Condition 2	Condition 1	Ig alpha-2 chain C region OS=Homo sapiens GN=IGHA2 PE=1 SV=3	1.09306e+08	1.09567e+08	1.27417e+08	1.1543e+08	0.0899398	2.41489e+08	2.35337e+08	2.52272e+08	2.43033e+08	0.0352713	2.10546	0.810771	8.06134e-05	1.07413	13.5986
P09493	9	3	526.67	4.8612e-05	2.16523	Condition 1	Condition 2	Tropomyosin alpha-1 chain OS=Homo sapiens GN=TPM1 PE=1 SV=2	5.64506e+07	5.08113e+07	5.44103e+07	5.38907e+07	0.0529831	2.61517e+07	2.37749e+07	2.4741e+07	2.48892e+07	0.0480244	0.461846	0.298225	8.4367e-05	-1.11452	13.533
P50213	2	2	132.07	6.85563e-05	1.74086	Condition 1	Condition 2	Isocitrate dehydrogenase [NAD] subunit alpha, mitochondrial OS=Homo sapiens GN=IDH3A PE=1 SV=1	7.64242e+07	7.62972e+07	7.12244e+07	7.46486e+07	0.039734	4.48122e+07	4.16356e+07	4.2193e+07	4.28803e+07	0.0395559	0.574428	0.492859	8.69637e-05	-0.799802	13.4892
P11532	1	1	46.8	5.95406e-05	1.97353	Condition 1	Condition 2	Dystrophin OS=Homo sapiens GN=DMD PE=1 SV=3	1.04559e+06	951100	989649	995447	0.0477294	508135	479506	525553	504398	0.0460937	0.506705	0.386386	8.74928e-05	-0.980781	13.4805
P78527	1	1	24.13	0.000104238	1.70472	Condition 1	Condition 2	DNA-dependent protein kinase catalytic subunit OS=Homo sapiens GN=PRKDC PE=1 SV=3	1.75852e+06	1.85998e+06	1.87615e+06	1.83155e+06	0.0348122	1.11808e+06	1.08806e+06	1.01705e+06	1.0744e+06	0.0482872	0.586606	0.796672	9.02354e-05	-0.769537	13.4359
Q9UDY2	1	1	100.44	6.68541e-05	1.72736	Condition 1	Condition 2	Tight junction protein ZO-2 OS=Homo sapiens GN=TJP2 PE=1 SV=2	4.40904e+06	4.22864e+06	4.06807e+06	4.23525e+06	0.0402774	2.55852e+06	2.38951e+06	2.40755e+06	2.45186e+06	0.0378521	0.578917	0.456788	9.1314e-05	-0.78857	13.4188
Q969L2	1	1	25.73	0.00109531	3.67053	Condition 2	Condition 1	Protein MAL2 OS=Homo sapiens GN=MAL2 PE=1 SV=1	4.54184e+06	6.81967e+06	7.54815e+06	6.30322e+06	0.248807	2.43017e+07	2.27939e+07	2.23128e+07	2.31361e+07	0.044851	3.67053	0.608988	0.000101022	1.87599	13.273
P42330	9	5	545.04	8.54855e-05	1.50892	Condition 2	Condition 1	Aldo-keto reductase family 1 member C3 OS=Homo sapiens GN=AKR1C3 PE=1 SV=4	1.75739e+08	1.71127e+08	1.81831e+08	1.76233e+08	0.030466	2.75567e+08	2.62851e+08	2.59345e+08	2.65921e+08	0.0320997	1.50892	0.566964	0.000103615	0.593515	13.2365
P52597	2	1	205.55	5.43166e-05	1.90104	Condition 1	Condition 2	Heterogeneous nuclear ribonucleoprotein F OS=Homo sapiens GN=HNRNPF PE=1 SV=3	2.05038e+07	1.85675e+07	1.91615e+07	1.94109e+07	0.0511025	1.05519e+07	1.02301e+07	9.85014e+06	1.02107e+07	0.0344019	0.526029	0.222855	0.000110857	-0.926785	13.139
Q14914	5	5	200.8	0.000265695	1.69341	Condition 1	Condition 2	Prostaglandin reductase 1 OS=Homo sapiens GN=PTGR1 PE=1 SV=2	8.24704e+07	8.56421e+07	8.36121e+07	8.39082e+07	0.019145	5.3213e+07	4.94563e+07	4.59804e+07	4.95499e+07	0.0730013	0.590525	0.329478	0.000114007	-0.759929	13.0986
O94905	3	3	144.14	0.000187924	1.51469	Condition 1	Condition 2	Erlin-2 OS=Homo sapiens GN=ERLIN2 PE=1 SV=1	6.72593e+07	6.49216e+07	6.45694e+07	6.55835e+07	0.0222923	4.45393e+07	4.45044e+07	4.08515e+07	4.32984e+07	0.0489422	0.660203	0.644966	0.000115309	-0.599019	13.0822
P21291	4	4	475.04	0.000104696	2.41524	Condition 1	Condition 2	Cysteine and glycine-rich protein 1 OS=Homo sapiens GN=CSRP1 PE=1 SV=3	2.61403e+08	2.32072e+08	2.457e+08	2.46392e+08	0.0595698	1.08432e+08	1.0454e+08	9.30746e+07	1.02015e+08	0.0782606	0.414037	0.456645	0.000116104	-1.27217	13.0723
P09429	4	4	244.15	3.77304e-05	2.14504	Condition 1	Condition 2	High mobility group protein B1 OS=Homo sapiens GN=HMGB1 PE=1 SV=3	3.36765e+08	3.78832e+08	3.49236e+08	3.54944e+08	0.0608737	1.67017e+08	1.60323e+08	1.69076e+08	1.65472e+08	0.0276567	0.466192	0.0858703	0.000119454	-1.101	13.0313
P02746	2	2	264.56	0.000411404	1.85477	Condition 2	Condition 1	Complement C1q subcomponent subunit B OS=Homo sapiens GN=C1QB PE=1 SV=3	5.54882e+07	4.7618e+07	5.70772e+07	5.33945e+07	0.0948657	1.00004e+08	9.6941e+07	1.00158e+08	9.90345e+07	0.0183238	1.85477	0.227499	0.000124893	0.891241	12.967
Q8NC51	1	1	68.58	9.01613e-05	2.31301	Condition 1	Condition 2	Plasminogen activator inhibitor 1 RNA-binding protein OS=Homo sapiens GN=SERBP1 PE=1 SV=2	1.23119e+07	1.11062e+07	1.10932e+07	1.15038e+07	0.0608431	4.67927e+06	4.8882e+06	5.35308e+06	4.97352e+06	0.0693501	0.432338	0.39078	0.000131695	-1.20977	12.8905
P00966	6	6	355.63	6.48917e-05	2.00653	Condition 1	Condition 2	Argininosuccinate synthase OS=Homo sapiens GN=ASS1 PE=1 SV=2	1.8134e+08	1.75325e+08	1.95761e+08	1.84142e+08	0.0570334	9.50766e+07	8.77851e+07	9.24529e+07	9.17715e+07	0.040243	0.498374	0.220103	0.000136235	-1.0047	12.8416
P22626	8	7	405.03	0.000241451	1.93714	Condition 1	Condition 2	Heterogeneous nuclear ribonucleoproteins A2/B1 OS=Homo sapiens GN=HNRNPA2B1 PE=1 SV=2	3.91142e+08	3.66569e+08	3.65729e+08	3.7448e+08	0.038548	2.12294e+08	1.86264e+08	1.81388e+08	1.93315e+08	0.0859505	0.516224	0.860268	0.00014061	-0.953932	12.796
P33121	21	21	1443.36	3.53991e-05	2.41383	Condition 1	Condition 2	Long-chain-fatty-acid--CoA ligase 1 OS=Homo sapiens GN=ACSL1 PE=1 SV=1	1.57965e+09	1.67244e+09	1.81576e+09	1.68928e+09	0.0704137	6.96427e+08	6.8211e+08	7.20967e+08	6.99835e+08	0.0280799	0.414279	0.0531372	0.000142223	-1.27133	12.7796
P14174	2	2	134.9	0.000135556	2.06289	Condition 1	Condition 2	Macrophage migration inhibitory factor OS=Homo sapiens GN=MIF PE=1 SV=4	1.73061e+08	1.6605e+08	1.84595e+08	1.74569e+08	0.0536394	8.74711e+07	7.80358e+07	8.83627e+07	8.46232e+07	0.0676206	0.484756	0.543816	0.000142952	-1.04467	12.7722
P04196	5	5	338.5	0.000182937	1.21732	Condition 2	Condition 1	Histidine-rich glycoprotein OS=Homo sapiens GN=HRG PE=1 SV=1	1.86102e+08	1.78808e+08	1.78583e+08	1.81164e+08	0.0236106	2.18103e+08	2.20985e+08	2.22514e+08	2.20534e+08	0.0101564	1.21732	0.430389	0.000145903	0.283705	12.7427
Q96Q06	46	46	4733.36	0.000185338	1.6737	Condition 2	Condition 1	Perilipin-4 OS=Homo sapiens GN=PLIN4 PE=2 SV=2	5.91997e+09	5.84699e+09	6.48123e+09	6.08273e+09	0.0570527	1.02624e+10	9.77401e+09	1.05057e+10	1.01807e+10	0.0366007	1.6737	0.928991	0.000153611	0.743044	12.6684
P09622	7	7	310.66	0.000177571	1.89153	Condition 1	Condition 2	Dihydrolipoyl dehydrogenase, mitochondrial OS=Homo sapiens GN=DLD PE=1 SV=2	1.60422e+08	1.74854e+08	1.73358e+08	1.69545e+08	0.0468051	9.59256e+07	8.38789e+07	8.90967e+07	8.96338e+07	0.0673995	0.528673	0.733828	0.000156309	-0.919551	12.6433
Q9UIF7	1	1	17.55	0.000591782	2.58853	Condition 2	Condition 1	A/G-specific adenine DNA glycosylase OS=Homo sapiens GN=MUTYH PE=1 SV=1	3.31706e+07	4.58196e+07	3.99925e+07	3.96609e+07	0.159629	9.93248e+07	1.08017e+08	1.00648e+08	1.02663e+08	0.045621	2.58853	0.707411	0.000157248	1.37213	12.6347
P07451	7	7	345.32	4.07234e-05	2.91662	Condition 1	Condition 2	Carbonic anhydrase 3 OS=Homo sapiens GN=CA3 PE=1 SV=3	7.90283e+08	8.25321e+08	9.22338e+08	8.4598e+08	0.0808632	2.77288e+08	3.06707e+08	2.86171e+08	2.90055e+08	0.0520223	0.342863	0.0927932	0.000162324	-1.5443	12.5888
P51991	3	3	141.01	0.000103251	1.98805	Condition 1	Condition 2	Heterogeneous nuclear ribonucleoprotein A3 OS=Homo sapiens GN=HNRNPA3 PE=1 SV=2	7.49862e+07	7.66662e+07	8.34645e+07	7.83723e+07	0.0572814	4.13087e+07	3.72294e+07	3.9727e+07	3.94217e+07	0.0521726	0.503005	0.346964	0.000166225	-0.991355	12.5546
Q9NTX5	2	2	260.79	0.000103346	1.47494	Condition 1	Condition 2	Ethylmalonyl-CoA decarboxylase OS=Homo sapiens GN=ECHDC1 PE=1 SV=2	7.83088e+07	7.36661e+07	7.30357e+07	7.50035e+07	0.0383947	5.16671e+07	5.12655e+07	4.96226e+07	5.08517e+07	0.0213018	0.677991	0.247911	0.000169422	-0.560661	12.5271
P16452	2	2	34.53	0.000119059	1.79931	Condition 2	Condition 1	Erythrocyte membrane protein band 4.2 OS=Homo sapiens GN=EPB42 PE=1 SV=3	1.5957e+06	1.75059e+06	1.64308e+06	1.66312e+06	0.0477198	2.88774e+06	3.16382e+06	2.92587e+06	2.99248e+06	0.0499939	1.79931	0.439227	0.000169439	0.847447	12.5269
Q96KP4	11	10	403.41	0.000146733	1.2686	Condition 1	Condition 2	Cytosolic non-specific dipeptidase OS=Homo sapiens GN=CNDP2 PE=1 SV=2	2.61483e+08	2.50099e+08	2.52464e+08	2.54682e+08	0.0235871	2.03867e+08	1.9699e+08	2.01418e+08	2.00758e+08	0.017361	0.788271	0.503697	0.000176873	-0.343237	12.465
P23434	1	1	116.51	0.000301932	1.73326	Condition 1	Condition 2	Glycine cleavage system H protein, mitochondrial OS=Homo sapiens GN=GCSH PE=1 SV=2	3.85039e+07	4.08372e+07	3.82182e+07	3.91864e+07	0.0366634	2.35426e+07	2.07484e+07	2.35344e+07	2.26085e+07	0.0712515	0.576947	0.886067	0.000184587	-0.79349	12.4034
P08123	1	1	83.96	6.25908e-05	2.85727	Condition 2	Condition 1	Collagen alpha-2(I) chain OS=Homo sapiens GN=COL1A2 PE=1 SV=7	2.16264e+07	2.18946e+07	2.43159e+07	2.26123e+07	0.0655144	5.96671e+07	6.39786e+07	7.01828e+07	6.46095e+07	0.0818172	2.85727	0.145639	0.000187477	1.51464	12.381
P06727	11	11	547.19	0.00029506	1.73139	Condition 1	Condition 2	Apolipoprotein A-IV OS=Homo sapiens GN=APOA4 PE=1 SV=3	3.87543e+08	3.57587e+08	3.75877e+08	3.73669e+08	0.0404089	2.23429e+08	1.98826e+08	2.25208e+08	2.15821e+08	0.0683211	0.577572	0.976251	0.000204844	-0.791927	12.2532
P16157	8	8	394.71	0.000108867	1.98832	Condition 2	Condition 1	Ankyrin-1 OS=Homo sapiens GN=ANK1 PE=1 SV=3	4.85283e+07	4.93753e+07	5.30929e+07	5.03322e+07	0.0482413	1.06447e+08	9.40459e+07	9.9737e+07	1.00077e+08	0.0620275	1.98832	0.265396	0.000206598	0.991553	12.2409
P22314	18	18	1362.97	0.000270392	1.33943	Condition 1	Condition 2	Ubiquitin-like modifier-activating enzyme 1 OS=Homo sapiens GN=UBA1 PE=1 SV=3	7.94581e+08	7.76041e+08	8.07112e+08	7.92578e+08	0.0197232	6.1491e+08	5.89101e+08	5.71178e+08	5.9173e+08	0.0371527	0.746589	0.671631	0.000208498	-0.421614	12.2277
Q16836	6	6	348.82	0.000299453	2.42786	Condition 1	Condition 2	Hydroxyacyl-coenzyme A dehydrogenase, mitochondrial OS=Homo sapiens GN=HADH PE=1 SV=3	3.29133e+08	2.94621e+08	2.96839e+08	3.06864e+08	0.0629495	1.41781e+08	1.24842e+08	1.12556e+08	1.26393e+08	0.116097	0.411885	0.731805	0.000209161	-1.27969	12.2231
Q13188	1	1	52.32	0.000414472	2.30365	Condition 1	Condition 2	Serine/threonine-protein kinase 3 OS=Homo sapiens GN=STK3 PE=1 SV=2	691664	721710	768173	727182	0.0530088	359560	305146	282292	315666	0.125746	0.434095	0.970698	0.000209396	-1.20392	12.2215
O00483	1	1	27.18	0.000240409	2.61489	Condition 1	Condition 2	NADH dehydrogenase [ubiquinone] 1 alpha subcomplex subunit 4 OS=Homo sapiens GN=NDUFA4 PE=1 SV=1	1.35021e+07	1.52056e+07	1.53981e+07	1.47019e+07	0.0709796	5.51516e+06	5.04168e+06	6.31028e+06	5.62237e+06	0.114019	0.382425	0.547971	0.000212048	-1.38675	12.2033
P50502	7	6	497	0.000427073	1.5035	Condition 1	Condition 2	Hsc70-interacting protein OS=Homo sapiens GN=ST13 PE=1 SV=2	3.74692e+08	3.67576e+08	3.80117e+08	3.74128e+08	0.0168105	2.62549e+08	2.31704e+08	2.52263e+08	2.48839e+08	0.0631133	0.665116	0.276413	0.000212913	-0.588323	12.1975
Q92878	1	1	32.64	9.69532e-05	1.6605	Condition 1	Condition 2	DNA repair protein RAD50 OS=Homo sapiens GN=RAD50 PE=1 SV=1	1.84652e+06	1.9166e+06	2.0504e+06	1.93784e+06	0.0534529	1.19104e+06	1.15428e+06	1.15575e+06	1.16703e+06	0.0178312	0.60223	0.0775869	0.000225795	-0.731614	12.1127
Q9NVH6	1	1	93.55	6.20809e-05	3.07215	Condition 1	Condition 2	Trimethyllysine dioxygenase, mitochondrial OS=Homo sapiens GN=TMLHE PE=1 SV=1	2.16918e+06	2.25157e+06	1.88598e+06	2.10224e+06	0.0912208	715610	698089	639173	684291	0.0585174	0.325505	0.0835591	0.000232937	-1.61925	12.0678
O75531	1	1	62.86	0.00044594	1.64137	Condition 1	Condition 2	Barrier-to-autointegration factor OS=Homo sapiens GN=BANF1 PE=1 SV=1	4.77473e+07	4.6552e+07	4.49634e+07	4.64209e+07	0.0300857	2.96725e+07	2.58869e+07	2.92858e+07	2.82817e+07	0.0736519	0.609246	0.620251	0.000233579	-0.714904	12.0638
P01876	10	4	1051.09	0.00064419	2.09852	Condition 2	Condition 1	Ig alpha-1 chain C region OS=Homo sapiens GN=IGHA1 PE=1 SV=2	1.41088e+09	1.60548e+09	1.82154e+09	1.61263e+09	0.127383	3.39583e+09	3.51312e+09	3.24348e+09	3.38414e+09	0.0399496	2.09852	0.604463	0.000237315	1.06937	12.0409
Q9H0U4	4	1	405.42	0.000220738	1.25768	Condition 1	Condition 2	Ras-related protein Rab-1B OS=Homo sapiens GN=RAB1B PE=1 SV=1	3.23115e+07	3.22402e+07	3.35693e+07	3.2707e+07	0.0228587	2.54546e+07	2.59926e+07	2.65703e+07	2.60058e+07	0.0214548	0.795115	0.715426	0.000239963	-0.330764	12.0249
P04004	3	3	317.31	0.000302691	1.32319	Condition 2	Condition 1	Vitronectin OS=Homo sapiens GN=VTN PE=1 SV=1	2.16298e+08	2.01346e+08	2.08978e+08	2.08874e+08	0.0357955	2.82356e+08	2.70892e+08	2.75892e+08	2.7638e+08	0.0207964	1.32319	0.742904	0.000243285	0.404019	12.0051
P62081	1	1	37.78	0.000357949	2.22029	Condition 1	Condition 2	40S ribosomal protein S7 OS=Homo sapiens GN=RPS7 PE=1 SV=1	1.06626e+07	1.20068e+07	1.14817e+07	1.13837e+07	0.0595091	5.70229e+06	5.08269e+06	4.59639e+06	5.12712e+06	0.108108	0.450392	0.802015	0.000244641	-1.15075	11.997
Q9NUV9	1	1	110.19	0.000254785	1.84581	Condition 1	Condition 2	GTPase IMAP family member 4 OS=Homo sapiens GN=GIMAP4 PE=1 SV=1	5.29139e+06	5.83328e+06	5.77373e+06	5.6328e+06	0.0527558	2.84812e+06	3.04258e+06	3.26428e+06	3.05166e+06	0.0682353	0.541766	0.658639	0.000249329	-0.884258	11.9697
P00325	17	17	1428.22	8.20516e-05	2.25002	Condition 1	Condition 2	Alcohol dehydrogenase 1B OS=Homo sapiens GN=ADH1B PE=1 SV=2	1.00583e+10	1.02121e+10	1.15185e+10	1.05963e+10	0.0757173	4.57816e+09	4.60463e+09	4.94547e+09	4.70942e+09	0.0434983	0.444441	0.122401	0.000249899	-1.16994	11.9664
P01911	2	1	88.74	0.000231761	2.46176	Condition 2	Condition 1	HLA class II histocompatibility antigen, DRB1-15 beta chain OS=Homo sapiens GN=HLA-DRB1 PE=1 SV=2	6.94177e+06	5.66581e+06	6.17426e+06	6.26062e+06	0.102602	1.45595e+07	1.66807e+07	1.49962e+07	1.54121e+07	0.0726764	2.46176	0.494968	0.000252906	1.29969	11.9491
P05109	3	3	240.28	6.09121e-05	2.66843	Condition 2	Condition 1	Protein S100-A8 OS=Homo sapiens GN=S100A8 PE=1 SV=1	2.05522e+08	1.89682e+08	1.98291e+08	1.97831e+08	0.0400837	5.29023e+08	4.81367e+08	5.73308e+08	5.27899e+08	0.0871019	2.66843	0.0577658	0.000254814	1.41599	11.9383
O75390	6	6	301.32	0.000163356	2.04439	Condition 1	Condition 2	Citrate synthase, mitochondrial OS=Homo sapiens GN=CS PE=1 SV=2	6.65379e+08	5.93727e+08	6.71485e+08	6.4353e+08	0.0671901	3.35214e+08	2.98796e+08	3.10324e+08	3.14778e+08	0.0591299	0.489142	0.312662	0.00026795	-1.03167	11.8658
Q13838	3	3	118.18	0.000286272	1.47871	Condition 1	Condition 2	Spliceosome RNA helicase DDX39B OS=Homo sapiens GN=DDX39B PE=1 SV=1	3.35577e+07	3.131e+07	3.21062e+07	3.23246e+07	0.0352565	2.19189e+07	2.08527e+07	2.28084e+07	2.186e+07	0.0447943	0.676265	0.849414	0.000270826	-0.564339	11.8503
P09936	7	7	367.12	0.000121725	2.74954	Condition 2	Condition 1	Ubiquitin carboxyl-terminal hydrolase isozyme L1 OS=Homo sapiens GN=UCHL1 PE=1 SV=2	1.22044e+08	1.22422e+08	1.40491e+08	1.28319e+08	0.0821609	3.54644e+08	3.21469e+08	3.82342e+08	3.52818e+08	0.0863829	2.74954	0.213746	0.000271319	1.45919	11.8477
Q16762	3	3	188.22	0.000874639	1.86385	Condition 1	Condition 2	Thiosulfate sulfurtransferase OS=Homo sapiens GN=TST PE=1 SV=4	1.76386e+08	1.71377e+08	1.73384e+08	1.73715e+08	0.0145116	1.06149e+08	8.40216e+07	8.94359e+07	9.32022e+07	0.123758	0.536523	0.0911746	0.000294099	-0.898289	11.7314
P24844	8	3	539.39	0.000298148	2.67052	Condition 1	Condition 2	Myosin regulatory light polypeptide 9 OS=Homo sapiens GN=MYL9 PE=1 SV=4	7.23707e+07	6.26896e+07	6.40153e+07	6.63585e+07	0.0790966	2.8412e+07	2.25545e+07	2.35792e+07	2.48485e+07	0.125893	0.374459	0.524221	0.000298475	-1.41712	11.7101
Q7Z4W1	4	4	86.51	0.000197577	2.09189	Condition 1	Condition 2	L-xylulose reductase OS=Homo sapiens GN=DCXR PE=1 SV=2	5.32217e+07	5.41673e+07	6.03072e+07	5.58987e+07	0.0688204	2.60096e+07	2.52627e+07	2.88926e+07	2.67216e+07	0.0717344	0.478036	0.397796	0.000299352	-1.06481	11.7059
P35527	16	15	1044.31	0.0004175	1.81778	Condition 2	Condition 1	Keratin, type I cytoskeletal 9 OS=Homo sapiens GN=KRT9 PE=1 SV=3	5.24939e+08	4.45035e+08	4.76766e+08	4.82247e+08	0.0834277	9.15594e+08	8.31579e+08	8.82681e+08	8.76618e+08	0.0482929	1.81778	0.949126	0.000305594	0.862176	11.6761
P08603	22	21	1350.37	0.000316443	1.63707	Condition 2	Condition 1	Complement factor H OS=Homo sapiens GN=CFH PE=1 SV=4	3.91896e+08	4.08622e+08	4.38954e+08	4.13157e+08	0.0577366	6.9719e+08	6.40856e+08	6.91063e+08	6.76369e+08	0.0456971	1.63707	0.74659	0.000307544	0.71112	11.6669
P27695	3	3	212.37	0.000202543	1.65549	Condition 1	Condition 2	DNA-(apurinic or apyrimidinic site) lyase OS=Homo sapiens GN=APEX1 PE=1 SV=2	5.21064e+07	4.97311e+07	5.5291e+07	5.23762e+07	0.0532635	3.16899e+07	3.0315e+07	3.29087e+07	3.16379e+07	0.0410154	0.604051	0.355753	0.000307784	-0.727258	11.6658
P12277	8	8	733.3	8.22885e-05	2.92559	Condition 1	Condition 2	Creatine kinase B-type OS=Homo sapiens GN=CKB PE=1 SV=1	6.67938e+08	7.60499e+08	8.0894e+08	7.45792e+08	0.0960612	2.72253e+08	2.4631e+08	2.46198e+08	2.5492e+08	0.0588832	0.341811	0.0841066	0.000313947	-1.54873	11.6372
P08311	1	1	58.92	0.0130721	4.66057	Condition 2	Condition 1	Cathepsin G OS=Homo sapiens GN=CTSG PE=1 SV=2	390067	1.32434e+06	1.19307e+06	969159	0.52188	4.36332e+06	4.71048e+06	4.47671e+06	4.51684e+06	0.0391925	4.66057	0.218266	0.000330116	2.22051	11.5647
P21953	1	1	25.18	0.00270609	4.06246	Condition 1	Condition 2	2-oxoisovalerate dehydrogenase subunit beta, mitochondrial OS=Homo sapiens GN=BCKDHB PE=1 SV=2	2.56844e+06	2.50831e+06	2.27876e+06	2.45183e+06	0.0623513	520106	420445	870054	603535	0.391246	0.246156	0.590706	0.00033998	-2.02235	11.5223
P39023	2	2	109.12	0.000324893	1.32964	Condition 1	Condition 2	60S ribosomal protein L3 OS=Homo sapiens GN=RPL3 PE=1 SV=2	4.27136e+07	4.04631e+07	4.0612e+07	4.12629e+07	0.0305013	3.1894e+07	3.11737e+07	3.0032e+07	3.10332e+07	0.0302546	0.752085	0.715084	0.000351462	-0.411032	11.4743
O43866	2	2	114.23	0.000156851	1.64613	Condition 2	Condition 1	CD5 antigen-like OS=Homo sapiens GN=CD5L PE=1 SV=1	2.56795e+07	2.47414e+07	2.4923e+07	2.51146e+07	0.0198113	4.39001e+07	3.90316e+07	4.10946e+07	4.13421e+07	0.0591087	1.64613	0.0796128	0.000353111	0.719082	11.4676
Q99798	19	19	1486.28	0.000281369	1.54357	Condition 1	Condition 2	Aconitate hydratase, mitochondrial OS=Homo sapiens GN=ACO2 PE=1 SV=2	7.55197e+08	6.96493e+08	7.59211e+08	7.36967e+08	0.04764	4.94423e+08	4.56746e+08	4.81159e+08	4.77442e+08	0.0400288	0.647848	0.457162	0.000356235	-0.626273	11.4549
P50991	9	8	423.11	0.00039925	1.25371	Condition 1	Condition 2	T-complex protein 1 subunit delta OS=Homo sapiens GN=CCT4 PE=1 SV=4	1.37245e+08	1.31522e+08	1.34137e+08	1.34301e+08	0.0213344	1.0757e+08	1.09957e+08	1.03843e+08	1.07123e+08	0.0287641	0.797633	0.927426	0.000363401	-0.326203	11.4262
P11177	3	3	287.88	0.000162704	2.15224	Condition 1	Condition 2	Pyruvate dehydrogenase E1 component subunit beta, mitochondrial OS=Homo sapiens GN=PDHB PE=1 SV=3	4.1749e+07	3.92669e+07	4.59675e+07	4.23278e+07	0.0800325	2.08228e+07	1.8674e+07	1.95038e+07	1.96668e+07	0.0551008	0.464631	0.18566	0.000383335	-1.10584	11.3491
O95777	1	1	35.34	0.00097102	1.86109	Condition 1	Condition 2	N-alpha-acetyltransferase 38, NatC auxiliary subunit OS=Homo sapiens GN=NAA38 PE=1 SV=3	6.56438e+06	6.20682e+06	6.13466e+06	6.30195e+06	0.036515	2.95959e+06	3.7439e+06	3.455e+06	3.38616e+06	0.117141	0.53732	0.503619	0.000386389	-0.896147	11.3377
Q92882	1	1	38.09	0.000825152	1.70885	Condition 1	Condition 2	Osteoclast-stimulating factor 1 OS=Homo sapiens GN=OSTF1 PE=1 SV=2	629991	676607	649556	652052	0.0358988	391604	411579	341536	381573	0.0945635	0.585188	0.592386	0.000403326	-0.773027	11.2758
Q14974	8	8	472.95	0.000598601	1.3879	Condition 1	Condition 2	Importin subunit beta-1 OS=Homo sapiens GN=KPNB1 PE=1 SV=2	1.18903e+08	1.14543e+08	1.15272e+08	1.16239e+08	0.0200937	8.90274e+07	8.17311e+07	8.04972e+07	8.37519e+07	0.0550459	0.720512	0.4085	0.000403954	-0.472906	11.2735
P0C0L5	33	1	2505.63	0.000119451	2.57954	Condition 2	Condition 1	Complement C4-B OS=Homo sapiens GN=C4B PE=1 SV=1	2.89557e+07	2.84172e+07	2.63521e+07	2.79083e+07	0.0492469	7.69683e+07	6.41393e+07	7.48647e+07	7.19907e+07	0.0955743	2.57954	0.0767411	0.000404799	1.36712	11.2705
Q6YN16	1	1	155.82	0.000378163	2.30372	Condition 1	Condition 2	Hydroxysteroid dehydrogenase-like protein 2 OS=Homo sapiens GN=HSDL2 PE=1 SV=1	4.60914e+07	4.1988e+07	3.95573e+07	4.25456e+07	0.0776242	2.05037e+07	1.83006e+07	1.66004e+07	1.84682e+07	0.105968	0.434081	0.519786	0.000407518	-1.20396	11.2608
Q9Y219	1	1	13.29	0.000251625	1.99407	Condition 2	Condition 1	Protein jagged-2 OS=Homo sapiens GN=JAG2 PE=1 SV=3	1.04094e+07	1.12859e+07	1.18729e+07	1.11894e+07	0.065824	2.41788e+07	2.13518e+07	2.14068e+07	2.23125e+07	0.0724501	1.99407	0.34381	0.000410179	0.995718	11.2515
P23297	2	2	81.26	0.00170786	3.24807	Condition 1	Condition 2	Protein S100-A1 OS=Homo sapiens GN=S100A1 PE=1 SV=2	8.41527e+06	7.72882e+06	7.14669e+06	7.76359e+06	0.0817928	2.62061e+06	2.82354e+06	1.7265e+06	2.39022e+06	0.244196	0.307875	0.91592	0.000418315	-1.69958	11.2231
P61081	1	1	80.13	0.000893183	1.51102	Condition 1	Condition 2	NEDD8-conjugating enzyme Ubc12 OS=Homo sapiens GN=UBE2M PE=1 SV=1	5.10008e+06	5.21274e+06	5.04601e+06	5.11961e+06	0.0166158	3.43447e+06	3.10264e+06	3.62742e+06	3.38818e+06	0.0783408	0.661804	0.186285	0.000423077	-0.595524	11.2068
P60842	6	6	359.51	0.000437574	1.39471	Condition 1	Condition 2	Eukaryotic initiation factor 4A-I OS=Homo sapiens GN=EIF4A1 PE=1 SV=1	1.56208e+08	1.52529e+08	1.631e+08	1.57279e+08	0.0341214	1.11601e+08	1.08687e+08	1.18018e+08	1.12769e+08	0.0423319	0.716997	0.883464	0.000427019	-0.47996	11.1934
O14950	6	1	457.11	0.000524155	1.65651	Condition 1	Condition 2	Myosin regulatory light chain 12B OS=Homo sapiens GN=MYL12B PE=1 SV=2	8.94249e+07	8.15716e+07	8.6431e+07	8.58092e+07	0.0461889	5.61132e+07	5.04047e+07	4.88858e+07	5.18012e+07	0.0735635	0.603679	0.960718	0.000430181	-0.728145	11.1828
Q96DE0	1	1	24.11	0.000234002	1.62799	Condition 1	Condition 2	U8 snoRNA-decapping enzyme OS=Homo sapiens GN=NUDT16 PE=1 SV=2	1.33297e+06	1.49944e+06	1.44801e+06	1.42681e+06	0.0597379	898897	882090	848276	876421	0.0294177	0.614253	0.167656	0.000431413	-0.703095	11.1786
Q15366	4	3	177.98	0.00057653	1.53919	Condition 1	Condition 2	Poly(rC)-binding protein 2 OS=Homo sapiens GN=PCBP2 PE=1 SV=1	4.87811e+07	4.57948e+07	4.91818e+07	4.79192e+07	0.0386205	3.30719e+07	2.90816e+07	3.1245e+07	3.11329e+07	0.0641607	0.649694	0.923793	0.000435835	-0.622167	11.1639
Q13620	1	1	13.34	0.00111471	2.18225	Condition 2	Condition 1	Cullin-4B OS=Homo sapiens GN=CUL4B PE=1 SV=4	5.03857e+07	3.70276e+07	4.20616e+07	4.31583e+07	0.156314	9.97444e+07	9.21071e+07	9.0695e+07	9.41822e+07	0.0516922	2.18225	0.684895	0.0004446	1.12582	11.1352
P13796	15	13	966.59	0.000370431	1.57763	Condition 2	Condition 1	Plastin-2 OS=Homo sapiens GN=LCP1 PE=1 SV=6	3.44524e+08	3.19661e+08	3.493e+08	3.37828e+08	0.0471064	5.56351e+08	5.02427e+08	5.40126e+08	5.32968e+08	0.0519084	1.57763	0.497238	0.00044996	0.65776	11.1179
P31942	1	1	90.34	0.000179544	1.84291	Condition 1	Condition 2	Heterogeneous nuclear ribonucleoprotein H3 OS=Homo sapiens GN=HNRNPH3 PE=1 SV=2	8.51757e+06	7.35592e+06	7.78284e+06	7.88544e+06	0.0745149	4.18448e+06	4.24158e+06	4.41035e+06	4.2788e+06	0.0274475	0.54262	0.0768299	0.00047821	-0.881985	11.0301
P10809	14	14	1439.42	0.000298976	1.73609	Condition 1	Condition 2	60 kDa heat shock protein, mitochondrial OS=Homo sapiens GN=HSPD1 PE=1 SV=2	9.15492e+08	9.0462e+08	1.01485e+09	9.44988e+08	0.0642838	5.55356e+08	5.64407e+08	5.13192e+08	5.44318e+08	0.050216	0.576006	0.33674	0.00047951	-0.795845	11.0262
Q63ZY3	1	1	113.61	0.000363752	2.52881	Condition 1	Condition 2	KN motif and ankyrin repeat domain-containing protein 2 OS=Homo sapiens GN=KANK2 PE=1 SV=1	3.05474e+06	3.63407e+06	3.20584e+06	3.29822e+06	0.0911132	1.39698e+06	1.37483e+06	1.14095e+06	1.30425e+06	0.108764	0.395442	0.36445	0.000484032	-1.33846	11.0126
P13929	3	1	396.41	0.000400151	1.68275	Condition 2	Condition 1	Beta-enolase OS=Homo sapiens GN=ENO3 PE=1 SV=4	3.69484e+06	3.55618e+06	3.98775e+06	3.74626e+06	0.0588146	6.30372e+06	5.93595e+06	6.67241e+06	6.30403e+06	0.0584118	1.68275	0.527287	0.000496675	0.750824	10.9754
Q9P2R7	5	5	183.39	0.000322326	1.94022	Condition 1	Condition 2	Succinyl-CoA ligase [ADP-forming] subunit beta, mitochondrial OS=Homo sapiens GN=SUCLA2 PE=1 SV=3	1.03287e+08	9.0101e+07	9.24465e+07	9.52782e+07	0.0738298	5.162e+07	4.53935e+07	5.03074e+07	4.9107e+07	0.0668394	0.515406	0.357588	0.000500751	-0.956218	10.9636
O43143	1	1	80.68	0.00126049	2.33807	Condition 1	Condition 2	Putative pre-mRNA-splicing factor ATP-dependent RNA helicase DHX15 OS=Homo sapiens GN=DHX15 PE=1 SV=2	2.61891e+06	2.92942e+06	2.96192e+06	2.83675e+06	0.0667499	1.37962e+06	1.26635e+06	993896	1.21329e+06	0.163409	0.427704	0.954053	0.000509458	-1.22532	10.9387
P60981	2	2	59.18	0.000379531	1.48579	Condition 1	Condition 2	Destrin OS=Homo sapiens GN=DSTN PE=1 SV=3	1.0359e+08	1.05113e+08	1.13327e+08	1.07343e+08	0.0487951	6.92961e+07	7.48636e+07	7.25797e+07	7.22465e+07	0.0387384	0.673041	0.444192	0.000513395	-0.571233	10.9276
P55786	4	4	123.48	0.000742731	1.3076	Condition 1	Condition 2	Puromycin-sensitive aminopeptidase OS=Homo sapiens GN=NPEPPS PE=1 SV=2	2.6327e+07	2.55822e+07	2.58629e+07	2.5924e+07	0.0145088	2.09367e+07	1.92394e+07	1.93008e+07	1.98256e+07	0.0485601	0.76476	0.264846	0.000516696	-0.386922	10.9184
P01023	40	40	3468.66	0.000329878	1.38838	Condition 2	Condition 1	Alpha-2-macroglobulin OS=Homo sapiens GN=A2M PE=1 SV=3	4.07173e+09	4.13316e+09	4.21289e+09	4.13926e+09	0.0170998	5.94504e+09	5.84783e+09	5.4477e+09	5.74686e+09	0.0458686	1.38838	0.134502	0.000520161	0.4734	10.9088
Q9UHG3	11	11	586.49	0.000558657	1.32777	Condition 1	Condition 2	Prenylcysteine oxidase 1 OS=Homo sapiens GN=PCYOX1 PE=1 SV=3	7.53792e+08	7.35793e+08	7.82278e+08	7.57288e+08	0.0309511	5.70833e+08	5.48378e+08	5.91821e+08	5.70344e+08	0.0380922	0.75314	0.924241	0.000534257	-0.40901	10.8702
P01861	7	3	609.17	0.000888876	1.43442	Condition 2	Condition 1	Ig gamma-4 chain C region OS=Homo sapiens GN=IGHG4 PE=1 SV=1	1.7692e+08	1.6812e+08	1.92047e+08	1.79029e+08	0.0675963	2.62752e+08	2.56158e+08	2.51497e+08	2.56803e+08	0.0220224	1.43442	0.35849	0.000543999	0.520465	10.8441
P43652	3	3	184.92	0.00178406	1.90808	Condition 2	Condition 1	Afamin OS=Homo sapiens GN=AFM PE=1 SV=1	4.78512e+07	5.76574e+07	6.44481e+07	5.66522e+07	0.147284	1.07016e+08	1.05744e+08	1.11532e+08	1.08097e+08	0.0281371	1.90808	0.23458	0.000554834	0.932124	10.8157
P13645	17	15	1251.41	0.000491479	1.60667	Condition 2	Condition 1	Keratin, type I cytoskeletal 10 OS=Homo sapiens GN=KRT10 PE=1 SV=6	7.10772e+08	7.40973e+08	7.985e+08	7.50082e+08	0.0594169	1.15502e+09	1.18212e+09	1.27826e+09	1.20513e+09	0.0537417	1.60667	0.642711	0.000556537	0.684074	10.8112
Q16658	5	5	214.35	0.00087977	1.53903	Condition 1	Condition 2	Fascin OS=Homo sapiens GN=FSCN1 PE=1 SV=3	8.95908e+07	8.61305e+07	9.17488e+07	8.91567e+07	0.0317889	6.31616e+07	5.6095e+07	5.45347e+07	5.79304e+07	0.0793536	0.64976	0.550844	0.000558756	-0.622022	10.8055
P32455	1	1	22.39	0.00126419	2.59073	Condition 1	Condition 2	Interferon-induced guanylate-binding protein 1 OS=Homo sapiens GN=GBP1 PE=1 SV=2	1.14927e+07	1.06718e+07	9.8696e+06	1.0678e+07	0.0760036	5.04186e+06	3.83454e+06	3.48847e+06	4.12162e+06	0.197864	0.385991	0.995143	0.000591135	-1.37336	10.7242
P30084	7	7	818.19	0.000522052	2.76654	Condition 1	Condition 2	Enoyl-CoA hydratase, mitochondrial OS=Homo sapiens GN=ECHS1 PE=1 SV=4	4.33292e+08	4.01666e+08	4.89532e+08	4.41497e+08	0.100802	1.34689e+08	1.69709e+08	1.74356e+08	1.59585e+08	0.135885	0.361463	0.383742	0.000592784	-1.46808	10.7202
P16930	7	7	359.15	0.00030331	1.64551	Condition 1	Condition 2	Fumarylacetoacetase OS=Homo sapiens GN=FAH PE=1 SV=2	2.32943e+08	2.52812e+08	2.66299e+08	2.50684e+08	0.0669348	1.48363e+08	1.51549e+08	1.5712e+08	1.52344e+08	0.0290968	0.607713	0.130471	0.000604253	-0.718539	10.6926
Q01995	12	12	786.46	4.51804e-07	2.80723	Condition 1	Condition 2	Transgelin OS=Homo sapiens GN=TAGLN PE=1 SV=4	2.5704e+09	2.64004e+09	2.7228e+09	2.64441e+09	0.0288506	9.3956e+08	9.37133e+08	9.49308e+08	9.42e+08	0.00684049	0.356223	0.0141662	0.000618391	-1.48915	10.6592
P37837	8	8	516.05	0.000862439	1.54014	Condition 1	Condition 2	Transaldolase OS=Homo sapiens GN=TALDO1 PE=1 SV=2	8.61849e+08	8.01385e+08	8.56174e+08	8.39803e+08	0.0397609	5.31413e+08	5.13297e+08	5.91115e+08	5.45275e+08	0.0746755	0.64929	0.804171	0.000635425	-0.623066	10.62
P11277	7	4	316.77	0.000948358	2.03478	Condition 2	Condition 1	Spectrin beta chain, erythrocytic OS=Homo sapiens GN=SPTB PE=1 SV=5	1.06963e+07	1.16407e+07	1.36996e+07	1.20122e+07	0.127848	2.32565e+07	2.37812e+07	2.62888e+07	2.44422e+07	0.066303	2.03478	0.946272	0.000646866	1.02487	10.5942
P62879	8	3	555.04	0.000559661	1.33151	Condition 1	Condition 2	Guanine nucleotide-binding protein G(I)/G(S)/G(T) subunit beta-2 OS=Homo sapiens GN=GNB2 PE=1 SV=3	1.60111e+08	1.53734e+08	1.65747e+08	1.59864e+08	0.037595	1.24216e+08	1.19424e+08	1.16548e+08	1.20062e+08	0.0322624	0.751029	0.586953	0.000647229	-0.413059	10.5934
P35908	16	11	1081.25	0.000666642	1.56053	Condition 2	Condition 1	Keratin, type II cytoskeletal 2 epidermal OS=Homo sapiens GN=KRT2 PE=1 SV=2	1.70909e+08	1.81529e+08	1.93451e+08	1.81963e+08	0.0619753	2.94807e+08	2.67542e+08	2.89531e+08	2.8396e+08	0.0509252	1.56053	0.756352	0.000649258	0.64204	10.5889
P08779	4	1	136.35	0.0038823	2.99986	Condition 2	Condition 1	Keratin, type I cytoskeletal 16 OS=Homo sapiens GN=KRT16 PE=1 SV=4	240168	171312	126087	179189	0.320593	571099	525307	516221	537543	0.0547189	2.99986	0.415416	0.000653561	1.58489	10.5794
O00763	14	11	509.38	0.000422916	1.73086	Condition 1	Condition 2	Acetyl-CoA carboxylase 2 OS=Homo sapiens GN=ACACB PE=1 SV=3	1.93498e+08	1.88256e+08	2.13921e+08	1.98558e+08	0.0682947	1.11677e+08	1.10132e+08	1.2234e+08	1.14716e+08	0.057946	0.577746	0.387482	0.00065393	-0.791492	10.5786
P42765	8	8	971.38	0.000446825	1.49562	Condition 1	Condition 2	3-ketoacyl-CoA thiolase, mitochondrial OS=Homo sapiens GN=ACAA2 PE=1 SV=2	7.26517e+08	6.99453e+08	7.77861e+08	7.3461e+08	0.0542132	5.10013e+08	4.90378e+08	4.73135e+08	4.91175e+08	0.0375674	0.66862	0.353462	0.000656448	-0.580741	10.573
P60660	8	8	565.98	0.000463645	1.67438	Condition 1	Condition 2	Myosin light polypeptide 6 OS=Homo sapiens GN=MYL6 PE=1 SV=2	7.58044e+08	7.14665e+08	8.14211e+08	7.62306e+08	0.0654719	4.72443e+08	4.27448e+08	4.65935e+08	4.55276e+08	0.0534136	0.597234	0.383709	0.00066378	-0.743631	10.557
O43615	1	1	111.01	0.00029557	1.77071	Condition 1	Condition 2	Mitochondrial import inner membrane translocase subunit TIM44 OS=Homo sapiens GN=TIMM44 PE=1 SV=2	4.19785e+06	4.83409e+06	4.79628e+06	4.60941e+06	0.0774328	2.58926e+06	2.67836e+06	2.5418e+06	2.60314e+06	0.0266317	0.564745	0.0727108	0.000669501	-0.824328	10.5446
P48449	1	1	73.81	0.000412975	1.67341	Condition 1	Condition 2	Lanosterol synthase OS=Homo sapiens GN=LSS PE=1 SV=1	3.70939e+06	3.29886e+06	3.32839e+06	3.44554e+06	0.0664541	2.17947e+06	2.00435e+06	1.99316e+06	2.05899e+06	0.0507475	0.597581	0.34471	0.000673668	-0.742793	10.5357
O14907	1	1	59.22	0.000626895	1.58216	Condition 1	Condition 2	Tax1-binding protein 3 OS=Homo sapiens GN=TAX1BP3 PE=1 SV=2	1.68756e+07	1.51455e+07	1.6499e+07	1.61734e+07	0.0562571	1.06606e+07	9.55245e+06	1.0454e+07	1.02224e+07	0.0576464	0.632048	0.591012	0.000682867	-0.661894	10.5161
Q9UBQ0	2	2	65.67	0.000904862	1.40727	Condition 1	Condition 2	Vacuolar protein sorting-associated protein 29 OS=Homo sapiens GN=VPS29 PE=1 SV=1	6.72754e+07	6.28866e+07	6.61235e+07	6.54285e+07	0.0347776	4.34744e+07	4.79956e+07	4.80101e+07	4.64934e+07	0.0562336	0.710598	0.861993	0.000695804	-0.492895	10.489
P00915	9	9	957.93	0.00107859	1.75402	Condition 2	Condition 1	Carbonic anhydrase 1 OS=Homo sapiens GN=CA1 PE=1 SV=2	2.16045e+09	2.2133e+09	2.62075e+09	2.3315e+09	0.108038	3.93086e+09	4.02257e+09	4.31506e+09	4.0895e+09	0.049065	1.75402	0.776416	0.000697854	0.810664	10.4848
P14780	1	1	21.71	0.000510949	4.65842	Condition 2	Condition 1	Matrix metalloproteinase-9 OS=Homo sapiens GN=MMP9 PE=1 SV=3	2.65314e+06	1.73144e+06	1.88191e+06	2.08883e+06	0.236718	1.12158e+07	9.27962e+06	8.69657e+06	9.73067e+06	0.13553	4.65842	0.246501	0.000714478	2.21984	10.4508
P17612	1	1	26.97	0.00127504	1.41437	Condition 1	Condition 2	cAMP-dependent protein kinase catalytic subunit alpha OS=Homo sapiens GN=PRKACA PE=1 SV=2	2.79194e+07	2.82575e+07	2.74382e+07	2.78717e+07	0.0147727	2.12924e+07	1.84297e+07	1.93962e+07	1.97061e+07	0.0738998	0.70703	0.148044	0.000729952	-0.500157	10.4199
P00751	11	11	667.65	0.000922889	1.50733	Condition 2	Condition 1	Complement factor B OS=Homo sapiens GN=CFB PE=1 SV=2	2.63472e+08	3.00372e+08	2.89929e+08	2.84591e+08	0.0668337	4.08039e+08	4.34339e+08	4.4454e+08	4.28973e+08	0.0439032	1.50733	0.99012	0.000730782	0.591995	10.4183
Q96AC1	9	9	346.94	0.00118201	1.35216	Condition 1	Condition 2	Fermitin family homolog 2 OS=Homo sapiens GN=FERMT2 PE=1 SV=1	3.66644e+08	3.57163e+08	3.71987e+08	3.65264e+08	0.0205541	2.80881e+08	2.5177e+08	2.77748e+08	2.70133e+08	0.059156	0.739555	0.361635	0.000733882	-0.435271	10.4122
Q08257	4	4	185.76	0.00101617	1.45594	Condition 1	Condition 2	Quinone oxidoreductase OS=Homo sapiens GN=CRYZ PE=1 SV=1	8.76942e+07	8.53355e+07	9.18247e+07	8.82848e+07	0.0372058	6.29994e+07	5.60779e+07	6.28359e+07	6.06377e+07	0.0651379	0.686842	0.81767	0.000737216	-0.541949	10.4056
Q6NZI2	9	9	998.61	0.00089053	1.33181	Condition 2	Condition 1	Polymerase I and transcript release factor OS=Homo sapiens GN=PTRF PE=1 SV=1	2.14687e+09	2.05167e+09	2.25404e+09	2.15086e+09	0.0470702	2.89723e+09	2.76656e+09	2.92983e+09	2.86454e+09	0.0301629	1.33181	0.842829	0.000747717	0.413392	10.3852
O60884	1	1	38.44	0.00120199	1.79514	Condition 1	Condition 2	DnaJ homolog subfamily A member 2 OS=Homo sapiens GN=DNAJA2 PE=1 SV=1	8.07729e+06	8.6324e+06	7.79622e+06	8.16864e+06	0.0520906	5.13403e+06	4.39598e+06	4.12127e+06	4.55043e+06	0.115098	0.55706	0.795215	0.000747848	-0.844094	10.385
P21695	19	18	1729.83	0.000745288	1.31683	Condition 1	Condition 2	Glycerol-3-phosphate dehydrogenase [NAD(+)], cytoplasmic OS=Homo sapiens GN=GPD1 PE=1 SV=4	5.40893e+09	5.47017e+09	5.75659e+09	5.54523e+09	0.0334683	4.1071e+09	4.12288e+09	4.40316e+09	4.21105e+09	0.0395537	0.7594	0.892253	0.000754148	-0.397068	10.3729
Q6NVY1	4	4	263.87	0.000545311	1.49496	Condition 1	Condition 2	3-hydroxyisobutyryl-CoA hydrolase, mitochondrial OS=Homo sapiens GN=HIBCH PE=1 SV=2	7.27881e+07	7.55504e+07	8.12208e+07	7.65198e+07	0.0561825	5.19169e+07	4.88562e+07	5.27828e+07	5.11853e+07	0.0403051	0.668916	0.374358	0.000774694	-0.580103	10.3341
Q02790	2	2	168.07	0.000654294	1.76676	Condition 1	Condition 2	Peptidyl-prolyl cis-trans isomerase FKBP4 OS=Homo sapiens GN=FKBP4 PE=1 SV=3	1.5617e+07	1.67533e+07	1.79786e+07	1.6783e+07	0.0703729	9.56917e+06	8.76377e+06	1.01649e+07	9.49929e+06	0.0740249	0.566007	0.523416	0.000782586	-0.821107	10.3195
Q15746	4	4	124.77	0.000922073	1.98211	Condition 1	Condition 2	Myosin light chain kinase, smooth muscle OS=Homo sapiens GN=MYLK PE=1 SV=4	4.08356e+07	3.72484e+07	4.32359e+07	4.04399e+07	0.0745123	2.03316e+07	1.81512e+07	2.27245e+07	2.04024e+07	0.112118	0.504512	0.731192	0.000783995	-0.987038	10.3169
P05091	20	18	1712.36	0.00117596	1.22652	Condition 1	Condition 2	Aldehyde dehydrogenase, mitochondrial OS=Homo sapiens GN=ALDH2 PE=1 SV=2	2.8458e+09	2.8855e+09	2.87967e+09	2.87032e+09	0.00746844	2.40456e+09	2.38845e+09	2.22764e+09	2.34022e+09	0.0418017	0.815315	0.0916392	0.000785817	-0.29457	10.3135
Q53T59	1	1	34.69	0.00123015	1.48483	Condition 1	Condition 2	HCLS1-binding protein 3 OS=Homo sapiens GN=HS1BP3 PE=1 SV=1	4.97327e+06	5.21687e+06	4.86746e+06	5.0192e+06	0.0356977	3.566e+06	3.48287e+06	3.0921e+06	3.38032e+06	0.0748578	0.673479	0.667882	0.000790148	-0.570295	10.3056
P38646	7	7	420.49	0.00109172	1.59871	Condition 1	Condition 2	Stress-70 protein, mitochondrial OS=Homo sapiens GN=HSPA9 PE=1 SV=2	3.76621e+08	3.49173e+08	3.82838e+08	3.69544e+08	0.0484744	2.48967e+08	2.10965e+08	2.33524e+08	2.31152e+08	0.08268	0.625506	0.935343	0.00079157	-0.676904	10.303
P01591	4	4	203.6	0.0012208	1.8696	Condition 2	Condition 1	Immunoglobulin J chain OS=Homo sapiens GN=IGJ PE=1 SV=4	4.99428e+07	5.81749e+07	6.27534e+07	5.6957e+07	0.113972	1.10467e+08	1.10352e+08	9.86416e+07	1.06487e+08	0.0638052	1.8696	0.954428	0.000798798	0.90273	10.2899
Q7Z4H8	1	1	21.18	0.000342713	1.93713	Condition 1	Condition 2	KDEL motif-containing protein 2 OS=Homo sapiens GN=KDELC2 PE=1 SV=2	1.49995e+06	1.73696e+06	1.77899e+06	1.67197e+06	0.0899794	883950	824181	881218	863117	0.0390988	0.516229	0.0958152	0.000813362	-0.953918	10.2638
P06732	5	5	207.7	8.5104e-07	7.39253	Condition 2	Condition 1	Creatine kinase M-type OS=Homo sapiens GN=CKM PE=1 SV=2	9.17496e+06	8.33425e+06	8.72155e+06	8.74359e+06	0.0481255	6.78925e+07	6.4189e+07	6.18303e+07	6.46373e+07	0.0472765	7.39253	0.0372174	0.000820889	2.88607	10.2505
P05164	4	4	174.44	0.000996983	2.35713	Condition 2	Condition 1	Myeloperoxidase OS=Homo sapiens GN=MPO PE=1 SV=1	2.59103e+07	3.02216e+07	3.46845e+07	3.02722e+07	0.14493	7.67558e+07	6.41094e+07	7.32006e+07	7.13553e+07	0.0914021	2.35713	0.623082	0.000825087	1.23703	10.2432
P78371	6	6	480.27	0.00129419	1.38219	Condition 1	Condition 2	T-complex protein 1 subunit beta OS=Homo sapiens GN=CCT2 PE=1 SV=4	8.07391e+07	7.75425e+07	7.9045e+07	7.91089e+07	0.0202161	5.4054e+07	6.15575e+07	5.60912e+07	5.72342e+07	0.0677934	0.723487	0.290432	0.00083386	-0.466961	10.2279
P01871	11	10	949.49	0.000662369	1.51005	Condition 2	Condition 1	Ig mu chain C region OS=Homo sapiens GN=IGHM PE=1 SV=3	1.88092e+09	1.90769e+09	2.06748e+09	1.95203e+09	0.0516763	2.84303e+09	2.86536e+09	3.13458e+09	2.94765e+09	0.055048	1.51005	0.55749	0.000834624	0.594593	10.2266
Q14624	8	8	690.06	0.000924886	1.40125	Condition 2	Condition 1	Inter-alpha-trypsin inhibitor heavy chain H4 OS=Homo sapiens GN=ITIH4 PE=1 SV=4	1.8952e+08	1.86627e+08	2.06268e+08	1.94138e+08	0.0546204	2.80309e+08	2.60164e+08	2.7564e+08	2.72037e+08	0.0387616	1.40125	0.99439	0.000835783	0.486719	10.2246
P02790	11	10	895.77	0.000672288	1.50121	Condition 2	Condition 1	Hemopexin OS=Homo sapiens GN=HPX PE=1 SV=2	1.97265e+09	2.10417e+09	2.1757e+09	2.08417e+09	0.0494151	3.32776e+09	3.03567e+09	3.02293e+09	3.12879e+09	0.0551125	1.50121	0.525863	0.000840836	0.586129	10.2159
P40939	13	13	1082.93	0.000489028	1.47511	Condition 1	Condition 2	Trifunctional enzyme subunit alpha, mitochondrial OS=Homo sapiens GN=HADHA PE=1 SV=2	6.94936e+08	6.63868e+08	7.4591e+08	7.01571e+08	0.0590408	4.70572e+08	4.65727e+08	4.90518e+08	4.75605e+08	0.0276269	0.677915	0.182852	0.000841472	-0.560824	10.2148
Q9HAV7	1	1	63.85	0.00218509	1.89157	Condition 1	Condition 2	GrpE protein homolog 1, mitochondrial OS=Homo sapiens GN=GRPEL1 PE=1 SV=2	4.11195e+06	4.42609e+06	4.2731e+06	4.27038e+06	0.0367848	2.17819e+06	1.94784e+06	2.64674e+06	2.25759e+06	0.157757	0.528663	0.325711	0.000859792	-0.91958	10.1837
P49257	1	1	24.88	0.000739222	1.37398	Condition 1	Condition 2	Protein ERGIC-53 OS=Homo sapiens GN=LMAN1 PE=1 SV=2	1.2202e+07	1.12553e+07	1.13784e+07	1.16119e+07	0.0443256	8.56163e+06	8.07875e+06	8.7135e+06	8.4513e+06	0.0392187	0.727814	0.586257	0.000864997	-0.458359	10.175
P11310	2	2	64.9	0.000706937	1.77878	Condition 1	Condition 2	Medium-chain specific acyl-CoA dehydrogenase, mitochondrial OS=Homo sapiens GN=ACADM PE=1 SV=1	8.60918e+07	8.94643e+07	9.90491e+07	9.1535e+07	0.073439	5.33159e+07	5.40683e+07	4.69943e+07	5.14595e+07	0.0755009	0.562183	0.500801	0.000865773	-0.830888	10.1737
P25705	19	19	1546.81	0.000813304	1.49386	Condition 1	Condition 2	ATP synthase subunit alpha, mitochondrial OS=Homo sapiens GN=ATP5A1 PE=1 SV=1	1.80364e+09	1.74562e+09	1.93076e+09	1.82667e+09	0.0518403	1.28512e+09	1.14902e+09	1.23421e+09	1.22278e+09	0.0562385	0.669405	0.690554	0.000866707	-0.57905	10.1722
Q14117	1	1	65.27	0.000211141	3.31798	Condition 1	Condition 2	Dihydropyrimidinase OS=Homo sapiens GN=DPYS PE=1 SV=1	2.25795e+06	2.65172e+06	2.95334e+06	2.621e+06	0.133047	713238	841803	814780	789941	0.085812	0.301389	0.0728222	0.000870398	-1.7303	10.166
P48147	2	2	233.63	0.000767573	1.50126	Condition 1	Condition 2	Prolyl endopeptidase OS=Homo sapiens GN=PREP PE=1 SV=2	2.10255e+07	2.17876e+07	2.33209e+07	2.20446e+07	0.0530324	1.43189e+07	1.41073e+07	1.56262e+07	1.46841e+07	0.0560239	0.666109	0.662359	0.000873939	-0.586171	10.1602
Q6P2I3	1	1	34.37	0.00151498	2.17309	Condition 1	Condition 2	Fumarylacetoacetate hydrolase domain-containing protein 2B OS=Homo sapiens GN=FAHD2B PE=1 SV=1	6.80693e+06	6.41461e+06	5.83237e+06	6.35131e+06	0.077205	2.91185e+06	3.38468e+06	2.47159e+06	2.92271e+06	0.15624	0.460174	0.928896	0.000895123	-1.11975	10.1256
P21980	3	3	145.36	0.00107481	1.63029	Condition 1	Condition 2	Protein-glutamine gamma-glutamyltransferase 2 OS=Homo sapiens GN=TGM2 PE=1 SV=2	3.11843e+07	3.01916e+07	3.36992e+07	3.16917e+07	0.0570499	2.02075e+07	1.76275e+07	2.04829e+07	1.94393e+07	0.0810262	0.613388	0.862956	0.000900009	-0.705127	10.1178
P51884	9	9	780.98	0.000907187	1.33041	Condition 1	Condition 2	Lumican OS=Homo sapiens GN=LUM PE=1 SV=2	5.91649e+09	5.68539e+09	6.12214e+09	5.90801e+09	0.0369835	4.36271e+09	4.30378e+09	4.65578e+09	4.44075e+09	0.042455	0.75165	0.853547	0.000917466	-0.411867	10.0901
Q9NSE4	4	4	175.56	0.0014359	1.80832	Condition 1	Condition 2	Isoleucine--tRNA ligase, mitochondrial OS=Homo sapiens GN=IARS2 PE=1 SV=2	1.80726e+07	1.95814e+07	2.04967e+07	1.93836e+07	0.0631517	1.13403e+07	9.34455e+06	1.14725e+07	1.07191e+07	0.111224	0.553	0.973618	0.000926883	-0.854649	10.0753
Q13011	6	6	383.62	0.000434868	1.62568	Condition 1	Condition 2	Delta(3,5)-Delta(2,4)-dienoyl-CoA isomerase, mitochondrial OS=Homo sapiens GN=ECH1 PE=1 SV=2	2.40843e+08	2.32639e+08	2.67542e+08	2.47008e+08	0.0738834	1.54113e+08	1.46831e+08	1.5488e+08	1.51942e+08	0.0292351	0.615128	0.111861	0.000933382	-0.701041	10.0652
Q07157	2	2	103.01	0.00182351	1.99285	Condition 1	Condition 2	Tight junction protein ZO-1 OS=Homo sapiens GN=TJP1 PE=1 SV=3	1.96432e+06	1.9572e+06	1.75448e+06	1.892e+06	0.0629751	1.09801e+06	938037	812141	949396	0.150909	0.501794	0.817686	0.000935474	-0.994832	10.062
P09525	9	7	659.24	0.00180321	1.44194	Condition 1	Condition 2	Annexin A4 OS=Homo sapiens GN=ANXA4 PE=1 SV=4	2.05572e+08	1.99286e+08	2.07802e+08	2.0422e+08	0.0216244	1.46725e+08	1.28379e+08	1.4978e+08	1.41628e+08	0.0817303	0.693508	0.254118	0.000939959	-0.528015	10.0551
P62937	9	8	549.57	0.0008083	1.55805	Condition 1	Condition 2	Peptidyl-prolyl cis-trans isomerase A OS=Homo sapiens GN=PPIA PE=1 SV=2	1.04254e+09	9.66663e+08	1.08976e+09	1.03299e+09	0.0601187	7.07709e+08	6.3312e+08	6.4817e+08	6.63e+08	0.0594931	0.641828	0.574904	0.00095659	-0.639741	10.0298
P01825	1	1	79.72	0.00166486	1.56217	Condition 2	Condition 1	Ig heavy chain V-II region NEWM OS=Homo sapiens PE=1 SV=1	1.34031e+07	1.48551e+07	1.62436e+07	1.48339e+07	0.0957516	2.40327e+07	2.31846e+07	2.23018e+07	2.3173e+07	0.0373492	1.56217	0.541531	0.000967924	0.64355	10.0128
P02749	7	7	380.96	0.000707415	1.24298	Condition 2	Condition 1	Beta-2-glycoprotein 1 OS=Homo sapiens GN=APOH PE=1 SV=3	4.59778e+08	4.536e+08	4.68876e+08	4.60751e+08	0.0166787	5.96779e+08	5.62999e+08	5.58336e+08	5.72705e+08	0.0366316	1.24298	0.23661	0.000970015	0.313803	10.0097
Q9UKG1	1	1	13.81	0.000598169	1.8745	Condition 1	Condition 2	DCC-interacting protein 13-alpha OS=Homo sapiens GN=APPL1 PE=1 SV=1	1.70445e+06	2.0181e+06	1.93286e+06	1.88514e+06	0.0860297	1.00891e+06	937000	1.07112e+06	1.00568e+06	0.0667383	0.533476	0.292453	0.000970125	-0.906504	10.0095
Q9NR19	2	2	60.97	0.000412374	1.93131	Condition 1	Condition 2	Acetyl-coenzyme A synthetase, cytoplasmic OS=Homo sapiens GN=ACSS2 PE=1 SV=1	2.35723e+07	2.79455e+07	2.77984e+07	2.64388e+07	0.0939333	1.43306e+07	1.33048e+07	1.34333e+07	1.36896e+07	0.0408254	0.517785	0.0964039	0.000971862	-0.949576	10.007
Q8N335	2	1	90.14	0.00144113	1.99844	Condition 1	Condition 2	Glycerol-3-phosphate dehydrogenase 1-like protein OS=Homo sapiens GN=GPD1L PE=1 SV=1	3.91347e+07	4.45792e+07	4.41389e+07	4.26176e+07	0.0709638	1.91269e+07	2.47332e+07	2.01162e+07	2.13254e+07	0.140319	0.50039	0.98938	0.000974616	-0.998876	10.0029
P07585	9	9	616.06	0.000821782	1.48368	Condition 1	Condition 2	Decorin OS=Homo sapiens GN=DCN PE=1 SV=1	3.07577e+09	2.78485e+09	3.07105e+09	2.97722e+09	0.0559646	2.11709e+09	1.92257e+09	1.98026e+09	2.00664e+09	0.0497885	0.673998	0.528917	0.000981191	-0.569184	9.99318
P42126	4	4	173.7	0.00398445	2.47504	Condition 1	Condition 2	Enoyl-CoA delta isomerase 1, mitochondrial OS=Homo sapiens GN=ECI1 PE=1 SV=1	8.71717e+07	8.08244e+07	9.19692e+07	8.66551e+07	0.0645125	3.61515e+07	4.31136e+07	2.57697e+07	3.50116e+07	0.249288	0.404034	0.581812	0.000991254	-1.30745	9.97846
Q92781	1	1	34.3	0.00193895	3.20448	Condition 2	Condition 1	11-cis retinol dehydrogenase OS=Homo sapiens GN=RDH5 PE=1 SV=1	2.4883e+06	3.77816e+06	3.95516e+06	3.40721e+06	0.235002	9.46231e+06	1.14319e+07	1.18608e+07	1.09184e+07	0.117149	3.20448	0.56309	0.000995146	1.68009	9.9728
O14979	2	1	72.86	0.00217226	1.82973	Condition 1	Condition 2	Heterogeneous nuclear ribonucleoprotein D-like OS=Homo sapiens GN=HNRPDL PE=1 SV=3	1.60487e+07	1.49868e+07	1.48085e+07	1.52813e+07	0.0438794	9.67917e+06	7.27285e+06	8.10309e+06	8.3517e+06	0.14635	0.546529	0.462674	0.00100041	-0.871629	9.96519
P06576	18	17	1713.29	0.000567285	1.63666	Condition 1	Condition 2	ATP synthase subunit beta, mitochondrial OS=Homo sapiens GN=ATP5B PE=1 SV=3	2.53445e+09	2.26651e+09	2.63102e+09	2.47732e+09	0.0762317	1.56624e+09	1.51531e+09	1.45941e+09	1.51365e+09	0.035302	0.611002	0.14825	0.00104846	-0.710751	9.89751
Q13885	14	2	1306.8	0.00152196	1.74393	Condition 2	Condition 1	Tubulin beta-2A chain OS=Homo sapiens GN=TUBB2A PE=1 SV=1	5.72667e+07	6.63222e+07	7.07355e+07	6.47748e+07	0.106004	1.1631e+08	1.04878e+08	1.17701e+08	1.12963e+08	0.06229	1.74393	0.975541	0.00105559	0.802343	9.88773
P30042	4	4	192.41	0.000575321	1.99046	Condition 1	Condition 2	ES1 protein homolog, mitochondrial OS=Homo sapiens GN=C21orf33 PE=1 SV=3	8.24043e+07	6.95562e+07	7.12539e+07	7.44048e+07	0.0938053	4.05613e+07	3.67341e+07	3.48465e+07	3.73806e+07	0.0778949	0.502396	0.296484	0.00106028	-0.993104	9.88134
P08697	2	2	97.62	0.00223809	1.70771	Condition 2	Condition 1	Alpha-2-antiplasmin OS=Homo sapiens GN=SERPINF2 PE=1 SV=3	2.40089e+07	2.72088e+07	3.10459e+07	2.74212e+07	0.12849	4.77437e+07	4.4735e+07	4.8004e+07	4.68275e+07	0.0387988	1.70771	0.420103	0.00106054	0.772066	9.88099
O14561	3	3	107.34	0.00165691	1.57295	Condition 1	Condition 2	Acyl carrier protein, mitochondrial OS=Homo sapiens GN=NDUFAB1 PE=1 SV=3	8.40675e+07	8.38794e+07	8.9953e+07	8.59666e+07	0.0401738	5.11694e+07	5.18837e+07	6.09063e+07	5.46531e+07	0.0993024	0.635748	0.576456	0.00108375	-0.653473	9.84976
P08238	25	12	1572.26	0.000784131	1.51339	Condition 1	Condition 2	Heat shock protein HSP 90-beta OS=Homo sapiens GN=HSP90AB1 PE=1 SV=4	6.76023e+08	7.15876e+08	7.65266e+08	7.19055e+08	0.0621743	5.01243e+08	4.58958e+08	4.65183e+08	4.75128e+08	0.0480499	0.660767	0.41367	0.00109101	-0.597786	9.84012
P05023	8	8	477.25	0.000869094	1.40603	Condition 1	Condition 2	Sodium/potassium-transporting ATPase subunit alpha-1 OS=Homo sapiens GN=ATP1A1 PE=1 SV=1	1.2292e+08	1.1225e+08	1.23619e+08	1.19596e+08	0.053278	8.88003e+07	8.33463e+07	8.30315e+07	8.50594e+07	0.038133	0.71122	0.411599	0.0011161	-0.491631	9.80731
P13798	4	4	189.19	0.00176715	1.34225	Condition 2	Condition 1	Acylamino-acid-releasing enzyme OS=Homo sapiens GN=APEH PE=1 SV=4	4.49357e+07	4.35249e+07	4.95893e+07	4.60166e+07	0.0689622	6.26027e+07	6.10894e+07	6.16047e+07	6.17656e+07	0.0124558	1.34225	0.111022	0.00112259	0.424648	9.79896
O00151	3	3	95.01	0.000917563	1.36795	Condition 1	Condition 2	PDZ and LIM domain protein 1 OS=Homo sapiens GN=PDLIM1 PE=1 SV=4	7.96909e+07	7.25169e+07	7.51983e+07	7.5802e+07	0.0478206	5.78332e+07	5.48059e+07	5.35991e+07	5.54127e+07	0.0393654	0.731019	0.531705	0.00112582	-0.452019	9.79481
Q9UJU6	5	5	304.07	0.000872528	1.42506	Condition 1	Condition 2	Drebrin-like protein OS=Homo sapiens GN=DBNL PE=1 SV=1	6.45797e+07	6.69394e+07	7.1809e+07	6.7776e+07	0.0543931	4.55432e+07	4.95826e+07	4.75543e+07	4.756e+07	0.042467	0.701724	0.461724	0.00113497	-0.511025	9.78314
Q02252	12	12	626.53	0.000335098	2.59643	Condition 1	Condition 2	Methylmalonate-semialdehyde dehydrogenase [acylating], mitochondrial OS=Homo sapiens GN=ALDH6A1 PE=1 SV=2	3.7262e+08	4.47881e+08	4.78016e+08	4.32839e+08	0.125414	1.79166e+08	1.59812e+08	1.61137e+08	1.66705e+08	0.064857	0.385144	0.0763132	0.00113595	-1.37653	9.78188
P01834	6	6	943.37	0.00206692	1.34262	Condition 2	Condition 1	Ig kappa chain C region OS=Homo sapiens GN=IGKC PE=1 SV=1	1.22017e+10	1.3784e+10	1.38236e+10	1.32698e+10	0.0697228	1.77579e+10	1.80443e+10	1.76468e+10	1.78163e+10	0.0115115	1.34262	0.0936746	0.00114551	0.425055	9.7698
Q13557	1	1	44.63	0.00103622	1.65013	Condition 1	Condition 2	Calcium/calmodulin-dependent protein kinase type II subunit delta OS=Homo sapiens GN=CAMK2D PE=1 SV=3	1.07581e+07	1.23236e+07	1.17957e+07	1.16258e+07	0.0685082	6.96374e+06	6.56294e+06	7.60939e+06	7.04536e+06	0.0749395	0.606011	0.61057	0.00114935	-0.722583	9.76496
P0C0L4	33	1	2455.65	0.00249338	2.42222	Condition 2	Condition 1	Complement C4-A OS=Homo sapiens GN=C4A PE=1 SV=1	1.03876e+07	1.33746e+07	1.57971e+07	1.31864e+07	0.205487	3.42142e+07	2.87769e+07	3.28303e+07	3.19405e+07	0.0884698	2.42222	0.958062	0.00115218	1.27633	9.76142
Q14195	12	9	884.99	0.00160748	1.54806	Condition 1	Condition 2	Dihydropyrimidinase-related protein 3 OS=Homo sapiens GN=DPYSL3 PE=1 SV=1	2.96175e+08	3.05972e+08	3.23435e+08	3.08527e+08	0.0447558	2.19813e+08	1.85146e+08	1.9294e+08	1.993e+08	0.0912589	0.645971	0.731286	0.00115875	-0.630459	9.75322
P09651	3	2	157.31	0.000955652	1.89398	Condition 1	Condition 2	Heterogeneous nuclear ribonucleoprotein A1 OS=Homo sapiens GN=HNRNPA1 PE=1 SV=5	6.67637e+07	5.98072e+07	7.11384e+07	6.59031e+07	0.0867097	3.70486e+07	3.12442e+07	3.60956e+07	3.47961e+07	0.0894557	0.527989	0.457634	0.00116135	-0.92142	9.74999
P24752	11	11	747.66	0.000613267	1.60063	Condition 1	Condition 2	Acetyl-CoA acetyltransferase, mitochondrial OS=Homo sapiens GN=ACAT1 PE=1 SV=1	5.78645e+08	6.42512e+08	6.73254e+08	6.3147e+08	0.0764268	3.88553e+08	3.8687e+08	4.08118e+08	3.94514e+08	0.0299406	0.624754	0.113034	0.00117186	-0.67864	9.73698
O43169	2	2	225.44	0.00126216	1.36938	Condition 1	Condition 2	Cytochrome b5 type B OS=Homo sapiens GN=CYB5B PE=1 SV=2	9.20931e+07	8.50432e+07	9.08869e+07	8.93411e+07	0.0422046	6.55674e+07	6.17146e+07	6.84441e+07	6.5242e+07	0.0517537	0.730258	0.890055	0.00117922	-0.453522	9.72795
Q13642	11	11	666.78	0.000797157	1.4291	Condition 2	Condition 1	Four and a half LIM domains protein 1 OS=Homo sapiens GN=FHL1 PE=1 SV=4	1.58689e+09	1.61054e+09	1.69779e+09	1.63174e+09	0.0357962	2.21623e+09	2.2989e+09	2.48064e+09	2.33192e+09	0.0580033	1.4291	0.314346	0.00118763	0.515112	9.7177
Q00610	22	22	1340.87	0.00180355	1.39904	Condition 1	Condition 2	Clathrin heavy chain 1 OS=Homo sapiens GN=CLTC PE=1 SV=5	5.55298e+08	5.89437e+08	5.75155e+08	5.73297e+08	0.0299067	4.38098e+08	4.12617e+08	3.78623e+08	4.09779e+08	0.072817	0.714777	0.496427	0.00118852	-0.484436	9.71662
P20810	10	10	595.84	0.00171171	1.32136	Condition 1	Condition 2	Calpastatin OS=Homo sapiens GN=CAST PE=1 SV=4	2.16988e+08	2.0904e+08	2.15621e+08	2.13883e+08	0.019868	1.735e+08	1.54881e+08	1.57216e+08	1.61866e+08	0.0626629	0.756796	0.298627	0.00120918	-0.402024	9.69175
P53597	2	2	138.19	0.000463412	2.26528	Condition 1	Condition 2	Succinyl-CoA ligase [ADP/GDP-forming] subunit alpha, mitochondrial OS=Homo sapiens GN=SUCLG1 PE=1 SV=4	7.46812e+07	6.43419e+07	8.10193e+07	7.33475e+07	0.114773	3.15986e+07	3.0707e+07	3.48313e+07	3.2379e+07	0.0670209	0.441446	0.12462	0.0012264	-1.17969	9.67135
Q04323	1	1	98.72	0.0021803	1.46308	Condition 1	Condition 2	UBX domain-containing protein 1 OS=Homo sapiens GN=UBXN1 PE=1 SV=2	8.75627e+06	8.85554e+06	9.07442e+06	8.89541e+06	0.0182992	5.62001e+06	5.89501e+06	6.72475e+06	6.07992e+06	0.0945925	0.68349	0.148337	0.00122846	-0.549008	9.66893
Q9UHD8	3	3	89.62	0.00115955	1.7499	Condition 1	Condition 2	Septin-9 OS=Homo sapiens GN=SEPT9 PE=1 SV=2	5.44313e+07	5.38718e+07	6.12818e+07	5.65283e+07	0.0729928	3.08776e+07	3.02059e+07	3.58275e+07	3.23037e+07	0.0950417	0.57146	0.712713	0.00122878	-0.807276	9.66856
P13010	3	3	67.44	0.000974437	1.61107	Condition 2	Condition 1	X-ray repair cross-complementing protein 5 OS=Homo sapiens GN=XRCC5 PE=1 SV=3	2.70354e+08	2.91549e+08	3.08607e+08	2.9017e+08	0.0660416	5.04175e+08	4.55588e+08	4.42686e+08	4.67483e+08	0.06936	1.61107	0.517742	0.00123118	0.688016	9.66575
P62310	1	1	24.03	0.00221377	1.5878	Condition 1	Condition 2	U6 snRNA-associated Sm-like protein LSm3 OS=Homo sapiens GN=LSM3 PE=1 SV=2	9.28541e+06	8.49938e+06	8.90912e+06	8.89797e+06	0.0441825	6.01574e+06	4.94124e+06	5.85494e+06	5.60397e+06	0.103417	0.629803	0.630287	0.00123525	-0.667026	9.66099
P40926	10	9	781.06	0.000505513	2.00429	Condition 1	Condition 2	Malate dehydrogenase, mitochondrial OS=Homo sapiens GN=MDH2 PE=1 SV=3	4.60404e+08	4.82216e+08	5.58118e+08	5.00246e+08	0.102533	2.56078e+08	2.32841e+08	2.59845e+08	2.49588e+08	0.0585962	0.49893	0.150375	0.00123932	-1.00309	9.65624
P30046	2	2	28.79	0.000610426	1.76169	Condition 1	Condition 2	D-dopachrome decarboxylase OS=Homo sapiens GN=DDT PE=1 SV=3	1.07005e+07	1.25488e+07	1.25541e+07	1.19345e+07	0.089545	6.85769e+06	6.48534e+06	6.98035e+06	6.77446e+06	0.0380528	0.567637	0.109976	0.00124516	-0.816959	9.64946
P17931	4	4	225.83	0.00345025	2.23886	Condition 1	Condition 2	Galectin-3 OS=Homo sapiens GN=LGALS3 PE=1 SV=5	2.10492e+08	2.06705e+08	2.32552e+08	2.16583e+08	0.0644497	7.689e+07	9.3886e+07	1.19438e+08	9.67381e+07	0.221392	0.446656	0.59628	0.00125107	-1.16276	9.64262
Q07666	1	1	44.88	0.000750849	1.52947	Condition 1	Condition 2	KH domain-containing, RNA-binding, signal transduction-associated protein 1 OS=Homo sapiens GN=KHDRBS1 PE=1 SV=1	1.69248e+07	1.59844e+07	1.83455e+07	1.70849e+07	0.0695738	1.1552e+07	1.12483e+07	1.07111e+07	1.11705e+07	0.0381225	0.653821	0.227497	0.00125494	-0.613032	9.63817
P34913	3	2	95.54	0.00282824	1.59632	Condition 1	Condition 2	Bifunctional epoxide hydrolase 2 OS=Homo sapiens GN=EPHX2 PE=1 SV=2	1.30761e+07	1.32118e+07	1.35268e+07	1.32716e+07	0.0174238	8.19621e+06	7.34156e+06	9.40378e+06	8.31385e+06	0.124627	0.62644	0.0948903	0.00126953	-0.674752	9.62149
P53396	3	3	83.28	0.00085639	1.6434	Condition 1	Condition 2	ATP-citrate synthase OS=Homo sapiens GN=ACLY PE=1 SV=3	3.59204e+07	3.08862e+07	3.4373e+07	3.37266e+07	0.0764571	2.18662e+07	1.99548e+07	1.97463e+07	2.05224e+07	0.056931	0.608495	0.340654	0.00127558	-0.716682	9.61463
P10515	6	6	334.93	0.000521566	1.94111	Condition 1	Condition 2	Dihydrolipoyllysine-residue acetyltransferase component of pyruvate dehydrogenase complex, mitochondrial OS=Homo sapiens GN=DLAT PE=1 SV=3	9.59723e+07	8.54608e+07	1.0485e+08	9.54279e+07	0.101713	4.94403e+07	5.12378e+07	4.68066e+07	4.91616e+07	0.0453337	0.51517	0.100163	0.00129492	-0.95688	9.59292
Q6Y1H2	1	1	38.15	0.00107376	1.41191	Condition 1	Condition 2	3-hydroxyacyl-CoA dehydratase 2 OS=Homo sapiens GN=PTPLB PE=1 SV=1	1.39522e+07	1.2532e+07	1.32307e+07	1.32383e+07	0.05364	9.86963e+06	9.04716e+06	9.21181e+06	9.3762e+06	0.0464131	0.708262	0.546058	0.00130394	-0.497645	9.5829
Q99536	8	8	684.85	0.00124246	1.30361	Condition 1	Condition 2	Synaptic vesicle membrane protein VAT-1 homolog OS=Homo sapiens GN=VAT1 PE=1 SV=2	6.1089e+08	5.72588e+08	6.16766e+08	6.00081e+08	0.0399782	4.80826e+08	4.45721e+08	4.54418e+08	4.60322e+08	0.039716	0.767099	0.734777	0.00130791	-0.382515	9.57853
O75608	1	1	20.13	0.000646433	1.69853	Condition 1	Condition 2	Acyl-protein thioesterase 1 OS=Homo sapiens GN=LYPLA1 PE=1 SV=1	6.9427e+06	5.84769e+06	6.36289e+06	6.38443e+06	0.0858062	3.90399e+06	3.60282e+06	3.76958e+06	3.7588e+06	0.0401397	0.588745	0.141007	0.00132173	-0.764285	9.56336
P49327	70	70	5744.67	2.24085e-06	5.46238	Condition 1	Condition 2	Fatty acid synthase OS=Homo sapiens GN=FASN PE=1 SV=3	1.20079e+10	1.29762e+10	1.3442e+10	1.28087e+10	0.0571151	2.46361e+09	2.30647e+09	2.26461e+09	2.3449e+09	0.0447435	0.18307	0.0403072	0.00134649	-2.44953	9.53658
P10909	6	6	516.87	0.00179072	1.22164	Condition 2	Condition 1	Clusterin OS=Homo sapiens GN=CLU PE=1 SV=1	3.51667e+08	3.69535e+08	3.83803e+08	3.68335e+08	0.0437152	4.58482e+08	4.43433e+08	4.47999e+08	4.49971e+08	0.0171468	1.22164	0.373463	0.00137592	0.288815	9.50539
Q04446	3	3	94.96	0.00174093	1.40413	Condition 1	Condition 2	1,4-alpha-glucan-branching enzyme OS=Homo sapiens GN=GBE1 PE=1 SV=3	5.86725e+07	5.92826e+07	6.31737e+07	6.03763e+07	0.0404429	4.32351e+07	3.99649e+07	4.57967e+07	4.29989e+07	0.0679798	0.712182	0.822017	0.0013871	-0.489682	9.49371
Q8TAT6	1	1	98.21	0.00179201	1.36876	Condition 1	Condition 2	Nuclear protein localization protein 4 homolog OS=Homo sapiens GN=NPLOC4 PE=1 SV=3	5.54246e+06	5.85659e+06	5.94792e+06	5.78232e+06	0.0367826	3.94674e+06	4.24464e+06	4.48211e+06	4.2245e+06	0.0634999	0.730589	0.771971	0.00140102	-0.452868	9.4793
P31146	3	3	120.59	0.00260738	1.7879	Condition 2	Condition 1	Coronin-1A OS=Homo sapiens GN=CORO1A PE=1 SV=4	2.1585e+07	2.72744e+07	2.75538e+07	2.5471e+07	0.132241	4.88732e+07	4.43122e+07	4.34337e+07	4.55397e+07	0.0641225	1.7879	0.858172	0.00145938	0.838266	9.42042
Q96CM8	2	2	63.99	0.00248368	1.59285	Condition 1	Condition 2	Acyl-CoA synthetase family member 2, mitochondrial OS=Homo sapiens GN=ACSF2 PE=1 SV=2	1.82167e+07	1.90526e+07	1.99549e+07	1.90747e+07	0.0455763	1.06364e+07	1.32747e+07	1.20147e+07	1.19753e+07	0.110194	0.627807	0.605321	0.00147068	-0.671607	9.40931
P29966	2	2	142.07	0.00186461	1.84706	Condition 1	Condition 2	Myristoylated alanine-rich C-kinase substrate OS=Homo sapiens GN=MARCKS PE=1 SV=4	1.3666e+08	1.56866e+08	1.58611e+08	1.50712e+08	0.0809561	8.57764e+07	8.82474e+07	7.07637e+07	8.15958e+07	0.115961	0.541401	0.751092	0.00149103	-0.885229	9.38948
P01019	4	4	273.43	0.00136153	1.34629	Condition 2	Condition 1	Angiotensinogen OS=Homo sapiens GN=AGT PE=1 SV=1	1.26337e+08	1.20584e+08	1.31267e+08	1.26063e+08	0.0424134	1.77022e+08	1.60786e+08	1.71344e+08	1.69717e+08	0.0485471	1.34629	0.592654	0.00153199	0.428994	9.35038
P30038	5	5	331.63	0.0010728	1.45958	Condition 2	Condition 1	Delta-1-pyrroline-5-carboxylate dehydrogenase, mitochondrial OS=Homo sapiens GN=ALDH4A1 PE=1 SV=3	1.10087e+08	1.04968e+08	1.01014e+08	1.05356e+08	0.0431751	1.64252e+08	1.52541e+08	1.44534e+08	1.53776e+08	0.0644899	1.45958	0.347642	0.0015407	0.545552	9.3422
P23142	4	4	309.43	0.00135169	1.4826	Condition 1	Condition 2	Fibulin-1 OS=Homo sapiens GN=FBLN1 PE=1 SV=4	9.74315e+07	8.70828e+07	8.89261e+07	9.11468e+07	0.0605637	6.5584e+07	5.8061e+07	6.07886e+07	6.14779e+07	0.0619507	0.674493	0.645003	0.00155929	-0.568125	9.3249
P09871	4	4	198.29	0.00193424	1.29434	Condition 2	Condition 1	Complement C1s subcomponent OS=Homo sapiens GN=C1S PE=1 SV=1	6.50438e+07	6.32505e+07	7.03603e+07	6.62182e+07	0.0558389	8.8034e+07	8.32455e+07	8.58463e+07	8.57086e+07	0.0279695	1.29434	0.591876	0.00156052	0.372212	9.32376
Q01105	2	2	66.37	0.00201134	1.46041	Condition 1	Condition 2	Protein SET OS=Homo sapiens GN=SET PE=1 SV=3	6.96666e+07	6.54479e+07	7.21838e+07	6.90994e+07	0.0492565	4.92147e+07	4.31925e+07	4.95384e+07	4.73152e+07	0.0755368	0.68474	0.951175	0.0015727	-0.546371	9.31254
Q32MZ4	1	1	28.32	0.00250605	1.51527	Condition 1	Condition 2	Leucine-rich repeat flightless-interacting protein 1 OS=Homo sapiens GN=LRRFIP1 PE=1 SV=2	1.72583e+06	1.77285e+06	1.63165e+06	1.71011e+06	0.0420443	1.23667e+06	1.1332e+06	1.01587e+06	1.12858e+06	0.0978848	0.659947	0.595121	0.00157534	-0.599579	9.31012
P51571	2	2	107.66	0.00151503	1.48479	Condition 1	Condition 2	Translocon-associated protein subunit delta OS=Homo sapiens GN=SSR4 PE=1 SV=1	2.40496e+07	2.16039e+07	2.18892e+07	2.25142e+07	0.0593965	1.60395e+07	1.53767e+07	1.40735e+07	1.51632e+07	0.0659653	0.673494	0.717513	0.00158895	-0.570262	9.29771
P04430	1	1	155.82	0.00088574	1.62911	Condition 2	Condition 1	Ig kappa chain V-I region BAN OS=Homo sapiens PE=1 SV=1	2.87568e+07	2.81841e+07	3.09753e+07	2.93054e+07	0.050307	5.22893e+07	4.5599e+07	4.5337e+07	4.77417e+07	0.0825368	1.62911	0.24558	0.00161631	0.704086	9.27308
P07954	4	4	314.52	0.000916375	1.4693	Condition 1	Condition 2	Fumarate hydratase, mitochondrial OS=Homo sapiens GN=FH PE=1 SV=3	1.89248e+08	1.75578e+08	2.02347e+08	1.89058e+08	0.0708004	1.32322e+08	1.25989e+08	1.27706e+08	1.28672e+08	0.0254573	0.680598	0.113007	0.00161644	-0.555126	9.27297
P02751	6	6	303.81	0.00421773	2.03096	Condition 2	Condition 1	Fibronectin OS=Homo sapiens GN=FN1 PE=1 SV=4	2.34287e+07	3.13793e+07	3.4531e+07	2.97796e+07	0.192124	6.49721e+07	5.93791e+07	5.70923e+07	6.04812e+07	0.0670269	2.03096	0.668477	0.00162142	1.02216	9.26852
P13667	9	9	513.13	0.00157684	1.2773	Condition 1	Condition 2	Protein disulfide-isomerase A4 OS=Homo sapiens GN=PDIA4 PE=1 SV=2	1.87851e+08	1.73787e+08	1.79837e+08	1.80492e+08	0.0390871	1.46789e+08	1.35655e+08	1.41479e+08	1.41308e+08	0.0394114	0.782902	0.767829	0.00164812	-0.353096	9.24496
Q9P035	2	2	113.52	0.00123696	1.30606	Condition 1	Condition 2	3-hydroxyacyl-CoA dehydratase 3 OS=Homo sapiens GN=PTPLAD1 PE=1 SV=2	2.76474e+07	2.51396e+07	2.72342e+07	2.66737e+07	0.0504066	2.09028e+07	1.99083e+07	2.04581e+07	2.04231e+07	0.0243931	0.765662	0.241432	0.00164846	-0.38522	9.24467
Q9Y371	1	1	41.59	0.00102257	1.61275	Condition 1	Condition 2	Endophilin-B1 OS=Homo sapiens GN=SH3GLB1 PE=1 SV=1	1.05996e+07	9.49496e+06	9.0928e+06	9.72912e+06	0.0801947	6.37789e+06	6.00951e+06	5.71053e+06	6.03264e+06	0.0554119	0.62006	0.310186	0.00165488	-0.689519	9.23906
P16070	1	1	35.97	0.00119024	2.2343	Condition 1	Condition 2	CD44 antigen OS=Homo sapiens GN=CD44 PE=1 SV=3	1.28719e+07	1.60002e+07	1.56939e+07	1.48553e+07	0.116087	5.81081e+06	6.79806e+06	7.33742e+06	6.64877e+06	0.116439	0.447567	0.335461	0.00167438	-1.15982	9.22216
Q8N573	1	1	20.19	0.00145087	1.41171	Condition 1	Condition 2	Oxidation resistance protein 1 OS=Homo sapiens GN=OXR1 PE=1 SV=2	3.80059e+06	3.97209e+06	4.24054e+06	4.0044e+06	0.0553762	2.74776e+06	2.74922e+06	3.01272e+06	2.83657e+06	0.0537811	0.708362	0.642491	0.00167803	-0.497441	9.21902
P25325	2	2	155.13	0.000655187	1.97708	Condition 1	Condition 2	3-mercaptopyruvate sulfurtransferase OS=Homo sapiens GN=MPST PE=1 SV=3	1.3999e+07	1.29043e+07	1.60458e+07	1.43164e+07	0.111384	6.88084e+06	7.19289e+06	7.64976e+06	7.24116e+06	0.0534061	0.505795	0.111095	0.00171798	-0.983374	9.18507
Q9UIJ7	2	2	111.85	0.00217919	1.55474	Condition 1	Condition 2	GTP:AMP phosphotransferase, mitochondrial OS=Homo sapiens GN=AK3 PE=1 SV=4	7.69033e+07	6.88904e+07	7.24249e+07	7.27395e+07	0.055207	5.19539e+07	4.48898e+07	4.35133e+07	4.67857e+07	0.0967904	0.643195	0.880426	0.00175425	-0.636673	9.15493
Q00839	4	4	239.08	0.00125746	1.55225	Condition 1	Condition 2	Heterogeneous nuclear ribonucleoprotein U OS=Homo sapiens GN=HNRNPU PE=1 SV=6	8.52772e+07	9.67186e+07	9.84581e+07	9.34847e+07	0.0765993	6.14071e+07	6.25099e+07	5.67592e+07	6.02254e+07	0.0506769	0.644228	0.30746	0.00177829	-0.634357	9.13529
Q9NUQ9	2	2	153.55	0.00158424	1.11972	Condition 1	Condition 2	Protein FAM49B OS=Homo sapiens GN=FAM49B PE=1 SV=1	3.4449e+07	3.45603e+07	3.58314e+07	3.49469e+07	0.0219755	3.07458e+07	3.15571e+07	3.13284e+07	3.12104e+07	0.0134021	0.893082	0.457567	0.00177831	-0.163136	9.13528
O75891	17	17	1238.76	0.00126173	1.37006	Condition 1	Condition 2	Cytosolic 10-formyltetrahydrofolate dehydrogenase OS=Homo sapiens GN=ALDH1L1 PE=1 SV=2	5.90432e+08	5.81925e+08	6.46173e+08	6.06177e+08	0.0575704	4.58635e+08	4.41882e+08	4.26818e+08	4.42445e+08	0.0359725	0.729894	0.34437	0.00178448	-0.454242	9.13028
P61626	4	4	264.41	0.00289548	2.06796	Condition 2	Condition 1	Lysozyme C OS=Homo sapiens GN=LYZ PE=1 SV=1	5.43105e+07	7.00934e+07	7.58348e+07	6.67462e+07	0.166986	1.28714e+08	1.52165e+08	1.33206e+08	1.38028e+08	0.0901782	2.06796	0.890011	0.00178831	1.04821	9.12719
Q68CZ2	2	1	85.81	0.000881888	1.63746	Condition 1	Condition 2	Tensin-3 OS=Homo sapiens GN=TNS3 PE=1 SV=2	5.98026e+06	6.75632e+06	7.14639e+06	6.62766e+06	0.0895663	4.05188e+06	3.929e+06	4.16172e+06	4.04753e+06	0.0287639	0.610704	0.0740806	0.0017901	-0.711456	9.12574
P06737	21	18	1041.61	0.0022957	1.45245	Condition 2	Condition 1	Glycogen phosphorylase, liver form OS=Homo sapiens GN=PYGL PE=1 SV=4	5.34127e+08	5.47847e+08	6.23563e+08	5.68512e+08	0.0847232	8.67509e+08	8.10628e+08	7.99066e+08	8.25734e+08	0.0443689	1.45245	0.733028	0.00181365	0.538486	9.10689
P04083	20	19	2205.49	0.00248462	1.31531	Condition 2	Condition 1	Annexin A1 OS=Homo sapiens GN=ANXA1 PE=1 SV=2	5.8211e+09	5.8106e+09	6.52193e+09	6.05121e+09	0.0673731	8.07535e+09	7.73834e+09	8.06403e+09	7.95924e+09	0.0240464	1.31531	0.361175	0.00183624	0.395408	9.08903
P62318	1	1	15.16	0.0031007	1.68207	Condition 1	Condition 2	Small nuclear ribonucleoprotein Sm D3 OS=Homo sapiens GN=SNRPD3 PE=1 SV=1	4.72982e+06	4.84176e+06	5.20101e+06	4.9242e+06	0.0499932	2.76691e+06	2.62927e+06	3.38623e+06	2.92747e+06	0.137735	0.594507	0.543072	0.00185259	-0.750235	9.07624
P04179	3	3	249.12	0.00268913	1.74484	Condition 1	Condition 2	Superoxide dismutase [Mn], mitochondrial OS=Homo sapiens GN=SOD2 PE=1 SV=2	2.42412e+08	2.80107e+08	2.62754e+08	2.61758e+08	0.0720788	1.53879e+08	1.66421e+08	1.29755e+08	1.50018e+08	0.124223	0.573118	0.987656	0.00187421	-0.803095	9.0595
P98082	1	1	36.12	0.00261172	1.36812	Condition 1	Condition 2	Disabled homolog 2 OS=Homo sapiens GN=DAB2 PE=1 SV=3	2.38688e+06	2.47981e+06	2.53631e+06	2.46766e+06	0.0305769	1.7455e+06	1.70318e+06	1.9624e+06	1.80369e+06	0.0771001	0.730932	0.454871	0.00190288	-0.452191	9.0376
P50914	3	3	146.25	0.00422267	1.52125	Condition 1	Condition 2	60S ribosomal protein L14 OS=Homo sapiens GN=RPL14 PE=1 SV=4	6.36577e+07	6.21947e+07	6.37543e+07	6.32022e+07	0.0138272	4.2215e+07	4.62676e+07	3.6156e+07	4.15462e+07	0.122486	0.657353	0.0572932	0.00190698	-0.605259	9.03449
P00367	10	10	620.16	0.00139522	1.33745	Condition 1	Condition 2	Glutamate dehydrogenase 1, mitochondrial OS=Homo sapiens GN=GLUD1 PE=1 SV=2	3.59314e+08	3.9477e+08	3.98909e+08	3.84331e+08	0.0566284	2.96395e+08	2.83454e+08	2.82232e+08	2.8736e+08	0.0273112	0.747689	0.230141	0.00191184	-0.419489	9.03082
P00738	23	12	1582.13	0.00363908	1.583	Condition 2	Condition 1	Haptoglobin OS=Homo sapiens GN=HP PE=1 SV=1	2.72336e+09	3.05353e+09	3.50786e+09	3.09492e+09	0.127268	4.7324e+09	4.88409e+09	5.08128e+09	4.89926e+09	0.0357061	1.583	0.329498	0.00192012	0.662662	9.02459
P10316	4	2	287.93	0.00156429	1.44654	Condition 1	Condition 2	HLA class I histocompatibility antigen, A-69 alpha chain OS=Homo sapiens GN=HLA-A PE=1 SV=2	1.50572e+08	1.38078e+08	1.56763e+08	1.48471e+08	0.0641076	9.80033e+07	1.01301e+08	1.08612e+08	1.02639e+08	0.0528958	0.691303	0.490974	0.0019268	-0.53261	9.01958
Q96CX2	8	8	410.27	0.00175172	1.28009	Condition 1	Condition 2	BTB/POZ domain-containing protein KCTD12 OS=Homo sapiens GN=KCTD12 PE=1 SV=1	2.27995e+08	2.24196e+08	2.42967e+08	2.31719e+08	0.0428289	1.88238e+08	1.80657e+08	1.74161e+08	1.81019e+08	0.0389195	0.781198	0.670163	0.00195637	-0.35624	8.9976
P04003	7	7	317.1	0.00230786	1.53913	Condition 2	Condition 1	C4b-binding protein alpha chain OS=Homo sapiens GN=C4BPA PE=1 SV=2	1.01823e+08	1.10933e+08	1.2226e+08	1.11672e+08	0.0916819	1.83666e+08	1.65994e+08	1.65972e+08	1.71878e+08	0.0593983	1.53913	0.997158	0.00195956	0.622115	8.99525
P45880	7	7	325.03	0.00227287	1.32747	Condition 1	Condition 2	Voltage-dependent anion-selective channel protein 2 OS=Homo sapiens GN=VDAC2 PE=1 SV=2	1.90484e+08	1.76117e+08	1.83037e+08	1.83213e+08	0.0392171	1.46204e+08	1.37944e+08	1.29903e+08	1.38017e+08	0.0590577	0.753315	0.874535	0.00196754	-0.408676	8.98939
Q9UIA9	2	1	103.85	0.00167852	1.2094	Condition 1	Condition 2	Exportin-7 OS=Homo sapiens GN=XPO7 PE=1 SV=3	3.70946e+06	3.63221e+06	3.89506e+06	3.74558e+06	0.0360682	3.02724e+06	3.18134e+06	3.08259e+06	3.09706e+06	0.0252044	0.826857	0.500592	0.00197292	-0.274291	8.98545
P39687	1	1	155.82	0.0021795	1.49323	Condition 1	Condition 2	Acidic leucine-rich nuclear phosphoprotein 32 family member A OS=Homo sapiens GN=ANP32A PE=1 SV=1	2.98202e+07	3.3382e+07	3.25831e+07	3.19284e+07	0.0585357	2.10414e+07	1.9861e+07	2.3244e+07	2.13821e+07	0.0803027	0.669689	0.915426	0.00197479	-0.578436	8.98408
P02452	1	1	24.37	0.00171437	1.70832	Condition 2	Condition 1	Collagen alpha-1(I) chain OS=Homo sapiens GN=COL1A1 PE=1 SV=5	1.27382e+07	1.05926e+07	1.18798e+07	1.17369e+07	0.0920135	2.19955e+07	1.90073e+07	1.9148e+07	2.00503e+07	0.0840932	1.70832	0.581806	0.00198103	0.772579	8.97954
P16401	1	1	14.5	0.0487568	4.06142	Condition 2	Condition 1	Histone H1.5 OS=Homo sapiens GN=HIST1H1B PE=1 SV=3	171299	1.1114e+06	928292	736997	0.676244	2.94982e+06	2.80139e+06	3.22855e+06	2.99326e+06	0.0724519	4.06142	0.318398	0.00198251	2.02198	8.97846
Q93052	5	5	251.93	0.00129202	1.68185	Condition 1	Condition 2	Lipoma-preferred partner OS=Homo sapiens GN=LPP PE=1 SV=1	1.5388e+08	1.32496e+08	1.57078e+08	1.47818e+08	0.0904155	9.38433e+07	8.30982e+07	8.67286e+07	8.789e+07	0.0621904	0.594583	0.286582	0.00198406	-0.75005	8.97733
P24539	1	1	82.83	0.00252182	1.64794	Condition 1	Condition 2	ATP synthase subunit b, mitochondrial OS=Homo sapiens GN=ATP5F1 PE=1 SV=2	9.7373e+07	8.83716e+07	1.00251e+08	9.53319e+07	0.0650057	5.33853e+07	5.47415e+07	6.54203e+07	5.7849e+07	0.113949	0.606817	0.938327	0.00199734	-0.720666	8.96771
P21333	49	46	3477.09	0.00169307	1.29566	Condition 1	Condition 2	Filamin-A OS=Homo sapiens GN=FLNA PE=1 SV=4	2.78605e+09	2.96436e+09	3.06891e+09	2.93977e+09	0.0486515	2.34742e+09	2.19224e+09	2.26713e+09	2.26893e+09	0.0342024	0.771805	0.454881	0.0020345	-0.373691	8.94111
P05155	8	8	558.39	0.00137113	1.4303	Condition 2	Condition 1	Plasma protease C1 inhibitor OS=Homo sapiens GN=SERPING1 PE=1 SV=2	4.6232e+08	4.74544e+08	4.98625e+08	4.78496e+08	0.0386046	7.31182e+08	6.83624e+08	6.38379e+08	6.84395e+08	0.0678062	1.4303	0.27355	0.00203511	0.516322	8.94067
P12724	1	1	29.57	0.00223959	1.85731	Condition 2	Condition 1	Eosinophil cationic protein OS=Homo sapiens GN=RNASE3 PE=1 SV=2	5.56648e+06	4.39723e+06	5.35982e+06	5.10784e+06	0.12217	1.04694e+07	8.86358e+06	9.12762e+06	9.48685e+06	0.0907627	1.85731	0.688715	0.00204323	0.893215	8.93493
P49189	11	9	550.27	1.44048e-05	1.74157	Condition 1	Condition 2	4-trimethylaminobutyraldehyde dehydrogenase OS=Homo sapiens GN=ALDH9A1 PE=1 SV=3	4.36192e+08	4.36156e+08	4.64698e+08	4.45682e+08	0.0369514	2.57904e+08	2.5306e+08	2.5676e+08	2.55908e+08	0.00989456	0.574195	0.0461883	0.00205618	-0.800388	8.92582
P40925	11	11	858.79	0.00294834	1.18492	Condition 2	Condition 1	Malate dehydrogenase, cytoplasmic OS=Homo sapiens GN=MDH1 PE=1 SV=4	1.18508e+09	1.0948e+09	1.18196e+09	1.15395e+09	0.0444101	1.36947e+09	1.35616e+09	1.37639e+09	1.36734e+09	0.00751641	1.18492	0.0773288	0.00211032	0.244791	8.88832
Q9NR20	1	1	14.43	0.00163089	1.59418	Condition 1	Condition 2	Dual specificity tyrosine-phosphorylation-regulated kinase 4 OS=Homo sapiens GN=DYRK4 PE=1 SV=2	9.45123e+08	8.11831e+08	9.32367e+08	8.9644e+08	0.0820477	5.22525e+08	5.93445e+08	5.70991e+08	5.6232e+08	0.064458	0.627282	0.390802	0.00212565	-0.672815	8.87788
P51636	2	2	169.84	0.0109232	2.26719	Condition 2	Condition 1	Caveolin-2 OS=Homo sapiens GN=CAV2 PE=1 SV=2	7.58924e+07	1.32315e+08	1.33807e+08	1.14005e+08	0.28959	2.73511e+08	2.48477e+08	2.53425e+08	2.58471e+08	0.051294	2.26719	0.277741	0.00215357	1.18091	8.85905
P13861	3	1	136.48	0.00569036	1.77759	Condition 1	Condition 2	cAMP-dependent protein kinase type II-alpha regulatory subunit OS=Homo sapiens GN=PRKAR2A PE=1 SV=2	3.32812e+06	3.50966e+06	3.3278e+06	3.38852e+06	0.0309594	2.26046e+06	1.89823e+06	1.56005e+06	1.90625e+06	0.183752	0.562559	0.16463	0.00216714	-0.829923	8.84999
Q86UX7	2	2	128.19	0.00189376	1.32485	Condition 2	Condition 1	Fermitin family homolog 3 OS=Homo sapiens GN=FERMT3 PE=1 SV=1	1.14249e+07	1.24403e+07	1.18589e+07	1.1908e+07	0.0427883	1.66434e+07	1.50239e+07	1.56618e+07	1.57764e+07	0.0517103	1.32485	0.561242	0.00223253	0.405831	8.8071
P49588	4	4	147.65	0.0029001	1.37072	Condition 1	Condition 2	Alanine--tRNA ligase, cytoplasmic OS=Homo sapiens GN=AARS PE=1 SV=2	3.08566e+07	3.2281e+07	3.35974e+07	3.2245e+07	0.0425106	2.42131e+07	2.4751e+07	2.16083e+07	2.35241e+07	0.0714518	0.729543	0.798849	0.0022345	-0.454935	8.80583
P55268	10	10	591.35	0.00413839	1.42357	Condition 2	Condition 1	Laminin subunit beta-2 OS=Homo sapiens GN=LAMB2 PE=1 SV=2	8.28343e+07	7.21588e+07	8.80721e+07	8.10217e+07	0.100097	1.1728e+08	1.12292e+08	1.16448e+08	1.1534e+08	0.0231654	1.42357	0.195829	0.00223813	0.509514	8.80349
Q7Z434	1	1	27.47	0.000644671	2.33505	Condition 1	Condition 2	Mitochondrial antiviral-signaling protein OS=Homo sapiens GN=MAVS PE=1 SV=2	9.13796e+06	1.1565e+07	9.18273e+06	9.96189e+06	0.13938	4.18996e+06	4.59562e+06	4.01314e+06	4.26624e+06	0.0700003	0.428256	0.088429	0.00225655	-1.22345	8.79167
O60506	5	4	294.55	0.00134165	1.54331	Condition 1	Condition 2	Heterogeneous nuclear ribonucleoprotein Q OS=Homo sapiens GN=SYNCRIP PE=1 SV=2	4.38109e+07	3.832e+07	3.79868e+07	4.00392e+07	0.0816847	2.733e+07	2.5719e+07	2.47822e+07	2.59437e+07	0.049673	0.647957	0.268783	0.0022578	-0.626029	8.79086
Q16647	2	2	173.17	0.00269449	1.24848	Condition 1	Condition 2	Prostacyclin synthase OS=Homo sapiens GN=PTGIS PE=1 SV=1	5.32819e+07	5.50347e+07	5.19132e+07	5.34099e+07	0.0292957	4.30212e+07	4.05293e+07	4.47896e+07	4.278e+07	0.0500314	0.800976	0.696576	0.00225864	-0.32017	8.79033
P29401	16	16	1344.48	0.00221883	1.335	Condition 1	Condition 2	Transketolase OS=Homo sapiens GN=TKT PE=1 SV=3	3.2007e+09	2.91993e+09	3.17389e+09	3.09817e+09	0.0500113	2.43927e+09	2.31879e+09	2.20413e+09	2.32073e+09	0.0506641	0.749064	0.730836	0.00228476	-0.416839	8.77374
O15260	2	2	141.41	0.00309528	1.33974	Condition 1	Condition 2	Surfeit locus protein 4 OS=Homo sapiens GN=SURF4 PE=1 SV=3	2.26788e+07	2.39668e+07	2.31188e+07	2.32548e+07	0.028151	1.88855e+07	1.65464e+07	1.66411e+07	1.73577e+07	0.0762765	0.746413	0.392906	0.00229413	-0.421954	8.76784
P01042	8	8	476.43	0.00171874	1.41986	Condition 2	Condition 1	Kininogen-1 OS=Homo sapiens GN=KNG1 PE=1 SV=2	2.38371e+08	2.56491e+08	2.61543e+08	2.52135e+08	0.0483277	3.85071e+08	3.46969e+08	3.41952e+08	3.57997e+08	0.0658667	1.41986	0.421511	0.00230327	0.505752	8.7621
P27348	12	8	994.35	0.00464989	1.68574	Condition 1	Condition 2	14-3-3 protein theta OS=Homo sapiens GN=YWHAQ PE=1 SV=1	3.78913e+08	4.23818e+08	4.12048e+08	4.04926e+08	0.0575021	2.59813e+08	2.60081e+08	2.00728e+08	2.40207e+08	0.142336	0.593212	0.633682	0.00231712	-0.753381	8.75345
P05546	6	6	251.14	0.00358894	1.36232	Condition 2	Condition 1	Heparin cofactor 2 OS=Homo sapiens GN=SERPIND1 PE=1 SV=3	8.57345e+07	9.2661e+07	1.01519e+08	9.33047e+07	0.0847944	1.2485e+08	1.25842e+08	1.3064e+08	1.27111e+08	0.0243627	1.36232	0.265702	0.00232388	0.446061	8.74925
P15559	4	4	308.46	9.48569e-06	2.82954	Condition 2	Condition 1	NAD(P)H dehydrogenase [quinone] 1 OS=Homo sapiens GN=NQO1 PE=1 SV=1	1.07699e+08	1.06444e+08	1.11359e+08	1.08501e+08	0.0235392	3.2323e+08	3.10315e+08	2.87476e+08	3.07007e+08	0.0589721	2.82954	0.0390241	0.00235019	1.50057	8.73301
Q9NRN5	2	2	91.6	0.00132592	1.56826	Condition 1	Condition 2	Olfactomedin-like protein 3 OS=Homo sapiens GN=OLFML3 PE=2 SV=1	1.77343e+07	1.87867e+07	2.10256e+07	1.91822e+07	0.0876282	1.25058e+07	1.16213e+07	1.25675e+07	1.22315e+07	0.0432818	0.63765	0.180486	0.00240156	-0.649163	8.70181
O14791	1	1	50.59	0.00206598	1.85162	Condition 2	Condition 1	Apolipoprotein L1 OS=Homo sapiens GN=APOL1 PE=1 SV=5	1.37217e+07	1.53583e+07	1.72325e+07	1.54375e+07	0.113798	2.60958e+07	2.79853e+07	3.16721e+07	2.85844e+07	0.0992146	1.85162	0.554618	0.00240882	0.888791	8.69745
P49407	2	2	29.8	0.00158543	1.42951	Condition 1	Condition 2	Beta-arrestin-1 OS=Homo sapiens GN=ARRB1 PE=1 SV=2	1.21862e+07	1.4105e+07	1.34134e+07	1.32348e+07	0.0734262	8.92706e+06	9.37199e+06	9.47586e+06	9.2583e+06	0.0314885	0.69954	0.165133	0.00245846	-0.515522	8.66803
P04181	1	1	14.64	0.00357287	1.85432	Condition 1	Condition 2	Ornithine aminotransferase, mitochondrial OS=Homo sapiens GN=OAT PE=1 SV=1	5.57349e+06	5.45746e+06	6.33812e+06	5.78969e+06	0.0826443	2.64457e+06	3.61402e+06	3.10819e+06	3.12226e+06	0.155297	0.53928	0.986729	0.00246725	-0.890894	8.66288
Q96IX5	1	1	155.82	0.00165995	1.9115	Condition 1	Condition 2	Up-regulated during skeletal muscle growth protein 5 OS=Homo sapiens GN=USMG5 PE=1 SV=1	2.51601e+07	2.04146e+07	2.47856e+07	2.34535e+07	0.112493	1.28683e+07	1.1003e+07	1.29377e+07	1.22697e+07	0.0894493	0.52315	0.295034	0.00247166	-0.934705	8.6603
O75208	1	1	35.51	0.00153297	2.15409	Condition 1	Condition 2	Ubiquinone biosynthesis protein COQ9, mitochondrial OS=Homo sapiens GN=COQ9 PE=1 SV=1	2.21405e+07	2.31677e+07	2.78924e+07	2.44002e+07	0.125722	1.24122e+07	9.83059e+06	1.17394e+07	1.13274e+07	0.118227	0.464233	0.320148	0.00249122	-1.10708	8.64893
P05089	1	1	57.46	0.0224393	10.2779	Condition 2	Condition 1	Arginase-1 OS=Homo sapiens GN=ARG1 PE=1 SV=2	10592.6	83844.5	107238	67225.1	0.750028	809188	520101	743510	690933	0.219335	10.2779	0.199327	0.00249215	3.36147	8.64839
P21964	2	2	131.16	0.00251045	1.23344	Condition 1	Condition 2	Catechol O-methyltransferase OS=Homo sapiens GN=COMT PE=1 SV=2	1.57576e+07	1.46799e+07	1.50892e+07	1.51755e+07	0.0358483	1.22173e+07	1.18539e+07	1.28392e+07	1.23035e+07	0.0404972	0.810743	0.912358	0.00252074	-0.302684	8.63194
Q16851	12	11	774.43	0.00213125	1.12399	Condition 2	Condition 1	UTP--glucose-1-phosphate uridylyltransferase OS=Homo sapiens GN=UGP2 PE=1 SV=5	7.48687e+08	7.56296e+08	7.60659e+08	7.55214e+08	0.0080227	8.50071e+08	8.24955e+08	8.7153e+08	8.48852e+08	0.0274622	1.12399	0.126557	0.00253422	0.168628	8.62424
P16219	4	3	348.34	0.00107502	1.97446	Condition 1	Condition 2	Short-chain specific acyl-CoA dehydrogenase, mitochondrial OS=Homo sapiens GN=ACADS PE=1 SV=1	6.65689e+07	7.76796e+07	8.55298e+07	7.65927e+07	0.124386	3.84566e+07	3.67639e+07	4.11548e+07	3.87918e+07	0.0570874	0.506468	0.102523	0.0025908	-0.981457	8.59238
P05783	6	4	499.83	0.00440933	1.38294	Condition 1	Condition 2	Keratin, type I cytoskeletal 18 OS=Homo sapiens GN=KRT18 PE=1 SV=2	1.1124e+08	1.08665e+08	1.05283e+08	1.08396e+08	0.027563	8.42851e+07	8.04843e+07	7.03739e+07	7.83811e+07	0.0917327	0.723098	0.294487	0.00261538	-0.467737	8.57876
P05156	3	3	146.82	0.00413778	1.68662	Condition 2	Condition 1	Complement factor I OS=Homo sapiens GN=CFI PE=1 SV=2	2.38555e+07	2.32761e+07	3.02204e+07	2.5784e+07	0.149431	4.63482e+07	4.26268e+07	4.14882e+07	4.34877e+07	0.058448	1.68662	0.60647	0.00266514	0.754134	8.55157
Q9GZT3	1	1	22.14	0.00402824	1.67168	Condition 1	Condition 2	SRA stem-loop-interacting RNA-binding protein, mitochondrial OS=Homo sapiens GN=SLIRP PE=1 SV=1	8.16042e+06	7.1789e+06	7.26065e+06	7.53332e+06	0.0722948	3.84519e+06	4.91145e+06	4.76268e+06	4.50644e+06	0.128144	0.598201	0.941495	0.00272336	-0.741298	8.5204
P12110	2	2	129.28	0.0020476	1.30902	Condition 1	Condition 2	Collagen alpha-2(VI) chain OS=Homo sapiens GN=COL6A2 PE=1 SV=4	1.8246e+07	1.63723e+07	1.80866e+07	1.75683e+07	0.0591313	1.35264e+07	1.36899e+07	1.30467e+07	1.3421e+07	0.0249073	0.763931	0.187658	0.00275784	-0.388486	8.50225
Q02127	1	1	34.99	0.00536599	2.16322	Condition 1	Condition 2	Dihydroorotate dehydrogenase (quinone), mitochondrial OS=Homo sapiens GN=DHODH PE=1 SV=3	2.25499e+06	2.71026e+06	2.7435e+06	2.56958e+06	0.106223	1.3891e+06	910866	1.26359e+06	1.18785e+06	0.208737	0.462274	0.904233	0.00290646	-1.11318	8.42652
Q9BS40	3	3	150.58	0.00544216	1.4737	Condition 1	Condition 2	Latexin OS=Homo sapiens GN=LXN PE=1 SV=2	9.34105e+07	9.09486e+07	8.96167e+07	9.13253e+07	0.0210757	6.98174e+07	6.14527e+07	5.46406e+07	6.19702e+07	0.122666	0.678566	0.120496	0.00291658	-0.559439	8.42151
P25311	6	6	350.69	0.00347443	1.34425	Condition 1	Condition 2	Zinc-alpha-2-glycoprotein OS=Homo sapiens GN=AZGP1 PE=1 SV=2	3.58221e+08	3.7375e+08	3.41282e+08	3.57751e+08	0.0453925	2.68936e+08	2.82914e+08	2.46554e+08	2.66134e+08	0.068917	0.74391	0.878878	0.00292714	-0.426801	8.41629
O95571	1	1	32.14	0.00234253	1.65376	Condition 1	Condition 2	Protein ETHE1, mitochondrial OS=Homo sapiens GN=ETHE1 PE=1 SV=2	9.75813e+06	8.40745e+06	8.303e+06	8.82286e+06	0.0919941	5.88136e+06	5.16928e+06	4.95443e+06	5.33502e+06	0.090943	0.604682	0.526522	0.00308124	-0.725753	8.34227
P18621	3	3	98.62	0.00183027	1.48228	Condition 1	Condition 2	60S ribosomal protein L17 OS=Homo sapiens GN=RPL17 PE=1 SV=3	6.20715e+07	6.68391e+07	7.34726e+07	6.74611e+07	0.0848777	4.36181e+07	4.60925e+07	4.68246e+07	4.55118e+07	0.0369206	0.674638	0.158578	0.00311314	-0.567816	8.32741
Q9H4G4	1	1	48.67	0.00422222	1.81405	Condition 2	Condition 1	Golgi-associated plant pathogenesis-related protein 1 OS=Homo sapiens GN=GLIPR2 PE=1 SV=3	3.35037e+06	3.87486e+06	4.54212e+06	3.92245e+06	0.152277	7.45548e+06	6.38808e+06	7.50301e+06	7.11553e+06	0.0885998	1.81405	0.946063	0.00311776	0.859214	8.32528
P52566	3	3	155.61	0.00392892	1.18757	Condition 1	Condition 2	Rho GDP-dissociation inhibitor 2 OS=Homo sapiens GN=ARHGDIB PE=1 SV=3	1.08751e+08	1.06077e+08	1.05577e+08	1.06802e+08	0.0159807	9.42252e+07	8.98666e+07	8.57068e+07	8.99329e+07	0.0473643	0.842054	0.276679	0.00311976	-0.248016	8.32435
P19823	8	8	487.98	0.00366259	1.27035	Condition 2	Condition 1	Inter-alpha-trypsin inhibitor heavy chain H2 OS=Homo sapiens GN=ITIH2 PE=1 SV=2	3.02296e+08	3.03933e+08	3.36123e+08	3.14117e+08	0.0607261	4.09762e+08	4.02865e+08	3.84495e+08	3.99041e+08	0.0327285	1.27035	0.638309	0.00312782	0.345232	8.32063
O14558	7	7	621.98	0.00274168	1.12463	Condition 1	Condition 2	Heat shock protein beta-6 OS=Homo sapiens GN=HSPB6 PE=1 SV=2	1.25098e+09	1.25246e+09	1.19059e+09	1.23135e+09	0.028669	1.1045e+09	1.08204e+09	1.09813e+09	1.09489e+09	0.0105736	0.889181	0.19421	0.00312952	-0.169451	8.31984
P25789	3	3	285.48	0.00297098	1.21229	Condition 1	Condition 2	Proteasome subunit alpha type-4 OS=Homo sapiens GN=PSMA4 PE=1 SV=1	6.91209e+07	6.40372e+07	6.68446e+07	6.66676e+07	0.0381969	5.42119e+07	5.35836e+07	5.71839e+07	5.49931e+07	0.0349702	0.824886	0.726384	0.00317575	-0.277733	8.29869
P43626	1	1	18.45	0.00767684	2.30347	Condition 2	Condition 1	Killer cell immunoglobulin-like receptor 2DL1 OS=Homo sapiens GN=KIR2DL1 PE=1 SV=1	4.0178e+07	6.09245e+07	6.78575e+07	5.632e+07	0.255731	1.41195e+08	1.14118e+08	1.33882e+08	1.29732e+08	0.107974	2.30347	0.972188	0.00319031	1.20381	8.29209
P61758	1	1	91.4	0.00959055	1.85409	Condition 1	Condition 2	Prefoldin subunit 3 OS=Homo sapiens GN=VBP1 PE=1 SV=3	2.76094e+06	3.05825e+06	2.95842e+06	2.92587e+06	0.0517124	1.72955e+06	1.81243e+06	1.1922e+06	1.57806e+06	0.213379	0.539348	0.335974	0.00319964	-0.890712	8.28787
P02042	13	6	1665.63	0.00291347	1.64956	Condition 2	Condition 1	Hemoglobin subunit delta OS=Homo sapiens GN=HBD PE=1 SV=2	4.38552e+09	4.10099e+09	4.98427e+09	4.49026e+09	0.100408	7.47679e+09	6.71523e+09	8.0288e+09	7.40694e+09	0.0890471	1.64956	0.636919	0.00320074	0.722078	8.28738
P30050	4	4	245.04	0.00291389	1.16316	Condition 1	Condition 2	60S ribosomal protein L12 OS=Homo sapiens GN=RPL12 PE=1 SV=1	9.19398e+07	9.70278e+07	9.78831e+07	9.56169e+07	0.033603	8.42719e+07	8.13598e+07	8.09816e+07	8.22044e+07	0.0219023	0.859727	0.477941	0.00323029	-0.218049	8.27412
Q13586	1	1	20.05	0.000886156	3.33967	Condition 2	Condition 1	Stromal interaction molecule 1 OS=Homo sapiens GN=STIM1 PE=1 SV=3	2.74425e+06	2.08894e+06	2.15748e+06	2.33022e+06	0.154574	7.18936e+06	9.44617e+06	6.71097e+06	7.78217e+06	0.187709	3.33967	0.114629	0.00328982	1.7397	8.24778
P24298	4	3	141.9	0.000909063	4.80204	Condition 1	Condition 2	Alanine aminotransferase 1 OS=Homo sapiens GN=GPT PE=1 SV=3	9.31672e+06	1.32419e+07	1.43692e+07	1.23093e+07	0.215464	2.01123e+06	2.71469e+06	2.96411e+06	2.56334e+06	0.192772	0.208245	0.0670962	0.00332755	-2.26365	8.23132
P00568	5	4	338.32	0.00389209	1.25904	Condition 1	Condition 2	Adenylate kinase isoenzyme 1 OS=Homo sapiens GN=AK1 PE=1 SV=3	8.03925e+07	7.53492e+07	7.56939e+07	7.71452e+07	0.0365222	6.3155e+07	6.32912e+07	5.73735e+07	6.12732e+07	0.0551288	0.794259	0.820558	0.00334177	-0.332319	8.22517
P14625	19	18	1193.33	0.00284539	1.21381	Condition 1	Condition 2	Endoplasmin OS=Homo sapiens GN=HSP90B1 PE=1 SV=1	9.53175e+08	9.54701e+08	1.02686e+09	9.78246e+08	0.043046	8.28957e+08	8.06157e+08	7.82685e+08	8.05933e+08	0.0287079	0.823855	0.463762	0.0034179	-0.279538	8.19267
Q7Z6Z7	3	3	179.32	0.00504677	1.52144	Condition 1	Condition 2	E3 ubiquitin-protein ligase HUWE1 OS=Homo sapiens GN=HUWE1 PE=1 SV=3	9.02192e+06	8.29617e+06	9.08473e+06	8.80094e+06	0.0497979	5.44604e+06	6.61523e+06	5.29262e+06	5.78463e+06	0.125056	0.657274	0.536994	0.00348955	-0.605434	8.16274
Q9UBE0	1	1	24.06	0.00719856	1.55948	Condition 1	Condition 2	SUMO-activating enzyme subunit 1 OS=Homo sapiens GN=SAE1 PE=1 SV=1	6.51226e+06	6.49902e+06	6.80388e+06	6.60505e+06	0.0260886	3.60795e+06	4.89567e+06	4.20262e+06	4.23542e+06	0.152166	0.641239	0.133435	0.00354114	-0.641066	8.14157
P50995	10	10	778.44	0.00379522	1.10864	Condition 2	Condition 1	Annexin A11 OS=Homo sapiens GN=ANXA11 PE=1 SV=1	1.77861e+08	1.70207e+08	1.76825e+08	1.74964e+08	0.0237343	1.97297e+08	1.94106e+08	1.90516e+08	1.93973e+08	0.0174895	1.10864	0.80053	0.00356714	0.148797	8.13102
Q96C23	1	1	70.48	0.00109964	2.31179	Condition 1	Condition 2	Aldose 1-epimerase OS=Homo sapiens GN=GALM PE=1 SV=1	664390	539387	492943	565573	0.156784	260470	249400	224073	244647	0.0762656	0.432566	0.0847958	0.00357936	-1.20901	8.12608
P61225	1	1	65.81	0.00253917	1.38771	Condition 1	Condition 2	Ras-related protein Rap-2b OS=Homo sapiens GN=RAP2B PE=1 SV=1	9.67915e+06	8.70885e+06	8.44816e+06	8.94539e+06	0.0725166	6.6166e+06	6.6014e+06	6.12051e+06	6.44617e+06	0.0437675	0.720613	0.318142	0.00361162	-0.472703	8.11314
P31948	7	6	465.19	0.00402029	1.40598	Condition 1	Condition 2	Stress-induced-phosphoprotein 1 OS=Homo sapiens GN=STIP1 PE=1 SV=1	1.4682e+08	1.32745e+08	1.35088e+08	1.38217e+08	0.0545605	1.07954e+08	9.45593e+07	9.24078e+07	9.83069e+07	0.0856846	0.711249	0.889819	0.00362281	-0.491574	8.10867
P52272	2	2	143.55	4.01323e-05	1.9106	Condition 1	Condition 2	Heterogeneous nuclear ribonucleoprotein M OS=Homo sapiens GN=HNRNPM PE=1 SV=3	1.89912e+07	2.09559e+07	2.08256e+07	2.02576e+07	0.0542336	1.04564e+07	1.07766e+07	1.05752e+07	1.06027e+07	0.0152671	0.523395	0.042495	0.00366618	-0.934027	8.0915
Q15582	1	1	25.78	0.0054657	1.44183	Condition 2	Condition 1	Transforming growth factor-beta-induced protein ig-h3 OS=Homo sapiens GN=TGFBI PE=1 SV=1	1.24616e+07	1.00803e+07	1.14419e+07	1.1328e+07	0.105467	1.69062e+07	1.54523e+07	1.66406e+07	1.6333e+07	0.0474003	1.44183	0.591458	0.00367767	0.5279	8.08699
P30837	2	1	125.34	1.21167e-05	3.46378	Condition 1	Condition 2	Aldehyde dehydrogenase X, mitochondrial OS=Homo sapiens GN=ALDH1B1 PE=1 SV=3	6.75544e+06	7.58333e+06	7.84451e+06	7.39443e+06	0.0768928	2.08785e+06	2.13848e+06	2.17803e+06	2.13479e+06	0.0211751	0.288702	0.0125624	0.00369372	-1.79235	8.08071
P36776	2	2	56.65	0.00419978	1.49149	Condition 1	Condition 2	Lon protease homolog, mitochondrial OS=Homo sapiens GN=LONP1 PE=1 SV=2	5.20736e+06	5.9174e+06	5.86688e+06	5.66388e+06	0.0699459	4.13308e+06	3.42694e+06	3.83237e+06	3.79746e+06	0.0933153	0.670471	0.888946	0.00369395	-0.576754	8.08062
Q13263	2	2	61.28	0.00246018	1.71327	Condition 1	Condition 2	Transcription intermediary factor 1-beta OS=Homo sapiens GN=TRIM28 PE=1 SV=5	2.49772e+07	2.00776e+07	2.28886e+07	2.26478e+07	0.108561	1.44709e+07	1.24039e+07	1.27823e+07	1.3219e+07	0.0832537	0.583678	0.333828	0.00373748	-0.776754	8.06372
Q9UEY8	2	2	52.22	0.00357545	1.54939	Condition 1	Condition 2	Gamma-adducin OS=Homo sapiens GN=ADD3 PE=1 SV=1	2.47226e+07	2.68534e+07	2.92284e+07	2.69348e+07	0.0836848	1.56111e+07	1.81453e+07	1.83961e+07	1.73842e+07	0.0886215	0.645417	0.636822	0.00374589	-0.631696	8.06047
P99999	2	2	78.35	0.000944658	3.16991	Condition 1	Condition 2	Cytochrome c OS=Homo sapiens GN=CYCS PE=1 SV=2	9.76828e+07	1.26225e+08	1.44708e+08	1.22872e+08	0.192811	3.45891e+07	3.87757e+07	4.29209e+07	3.87619e+07	0.107475	0.315466	0.0599875	0.00375168	-1.66444	8.05825
P52789	3	2	86.57	0.00687615	1.60096	Condition 1	Condition 2	Hexokinase-2 OS=Homo sapiens GN=HK2 PE=1 SV=2	9.30178e+06	9.29932e+06	8.44863e+06	9.01658e+06	0.0545507	6.40392e+06	5.74454e+06	4.74748e+06	5.63198e+06	0.148072	0.624625	0.516177	0.00375487	-0.678938	8.05702
P60174	12	12	1507.52	0.00185437	1.63296	Condition 1	Condition 2	Triosephosphate isomerase OS=Homo sapiens GN=TPI1 PE=1 SV=3	1.76561e+09	1.94969e+09	2.19078e+09	1.96869e+09	0.108305	1.15998e+09	1.25688e+09	1.19992e+09	1.20559e+09	0.0403936	0.612384	0.0991561	0.00378158	-0.707492	8.04679
P08107	21	19	1832.33	0.00242345	1.3448	Condition 1	Condition 2	Heat shock 70 kDa protein 1A/1B OS=Homo sapiens GN=HSPA1A PE=1 SV=5	1.95239e+09	2.09849e+09	2.25543e+09	2.1021e+09	0.0720958	1.56589e+09	1.5305e+09	1.59302e+09	1.56314e+09	0.020055	0.743606	0.0820622	0.00380755	-0.42739	8.03692
Q15181	4	4	269.72	0.0111893	1.7738	Condition 2	Condition 1	Inorganic pyrophosphatase OS=Homo sapiens GN=PPA1 PE=1 SV=2	8.33288e+07	1.20369e+08	1.25323e+08	1.09674e+08	0.209251	2.03472e+08	1.87312e+08	1.92832e+08	1.94539e+08	0.042225	1.7738	0.227137	0.00381138	0.826841	8.03547
Q8WXH2	1	1	18.09	0.00368556	1.44558	Condition 1	Condition 2	Junctophilin-3 OS=Homo sapiens GN=JPH3 PE=1 SV=2	6.76266e+07	7.37722e+07	7.80328e+07	7.31439e+07	0.0715231	4.66233e+07	5.42689e+07	5.09026e+07	5.05983e+07	0.0757307	0.691763	0.698336	0.00383104	-0.53165	8.02805
P36957	3	3	314.75	0.00379246	1.3666	Condition 1	Condition 2	Dihydrolipoyllysine-residue succinyltransferase component of 2-oxoglutarate dehydrogenase complex, mitochondrial OS=Homo sapiens GN=DLST PE=1 SV=4	8.79463e+07	8.4943e+07	9.49393e+07	8.92762e+07	0.057452	6.31842e+07	6.21743e+07	7.06228e+07	6.53271e+07	0.0706279	0.731742	0.894541	0.0038527	-0.450594	8.01992
Q9UIQ6	3	3	140.14	0.00382641	1.21825	Condition 2	Condition 1	Leucyl-cystinyl aminopeptidase OS=Homo sapiens GN=LNPEP PE=1 SV=3	1.2954e+07	1.26906e+07	1.37594e+07	1.31347e+07	0.0423962	1.59062e+07	1.54409e+07	1.66568e+07	1.60013e+07	0.0383398	1.21825	0.903461	0.00389997	0.284806	8.00232
Q14699	1	1	13.72	0.00577436	1.46558	Condition 1	Condition 2	Raftlin OS=Homo sapiens GN=RFTN1 PE=1 SV=4	1.93297e+07	2.09176e+07	2.04914e+07	2.02462e+07	0.0405922	1.57272e+07	1.26488e+07	1.30674e+07	1.38145e+07	0.120861	0.682323	0.390069	0.00391514	-0.551474	7.99672
P14866	3	3	167.8	0.00262292	1.47164	Condition 1	Condition 2	Heterogeneous nuclear ribonucleoprotein L OS=Homo sapiens GN=HNRNPL PE=1 SV=2	3.79869e+07	3.76797e+07	4.37068e+07	3.97911e+07	0.0853089	2.78359e+07	2.79314e+07	2.53484e+07	2.70386e+07	0.0541622	0.679513	0.313834	0.00394325	-0.557427	7.9864
Q14118	2	2	95.7	0.00598794	2.00855	Condition 1	Condition 2	Dystroglycan OS=Homo sapiens GN=DAG1 PE=1 SV=2	8.84474e+06	1.02294e+07	1.08161e+07	9.96341e+06	0.101594	6.09745e+06	4.05919e+06	4.72483e+06	4.96049e+06	0.209528	0.497871	0.973551	0.00394792	-1.00616	7.98469
Q92945	2	2	180.16	0.00161509	2.19023	Condition 1	Condition 2	Far upstream element-binding protein 2 OS=Homo sapiens GN=KHSRP PE=1 SV=4	1.16217e+07	1.30386e+07	1.56426e+07	1.34343e+07	0.151809	6.33184e+06	5.48729e+06	6.5821e+06	6.13374e+06	0.0935248	0.456574	0.146636	0.00395804	-1.13108	7.981
O95831	8	8	301.7	0.00274151	1.49548	Condition 1	Condition 2	Apoptosis-inducing factor 1, mitochondrial OS=Homo sapiens GN=AIFM1 PE=1 SV=1	9.86564e+07	1.05673e+08	1.17256e+08	1.07195e+08	0.087623	7.00785e+07	7.65748e+07	6.83845e+07	7.16793e+07	0.0603166	0.66868	0.349661	0.00400523	-0.580613	7.9639
Q02218	9	9	441.83	0.00248741	1.61823	Condition 1	Condition 2	2-oxoglutarate dehydrogenase, mitochondrial OS=Homo sapiens GN=OGDH PE=1 SV=3	9.90389e+07	1.1796e+08	1.21266e+08	1.12755e+08	0.106364	7.31989e+07	6.57279e+07	7.01077e+07	6.96782e+07	0.0538755	0.61796	0.178464	0.00403517	-0.694415	7.95315
P08559	1	1	25.13	0.00264492	2.69132	Condition 1	Condition 2	Pyruvate dehydrogenase E1 component subunit alpha, somatic form, mitochondrial OS=Homo sapiens GN=PDHA1 PE=1 SV=3	1.35608e+07	1.90593e+07	1.78818e+07	1.6834e+07	0.171983	6.81263e+06	6.9441e+06	5.00801e+06	6.25491e+06	0.17296	0.371565	0.245051	0.00405645	-1.42831	7.94557
P13987	2	2	136.3	0.00307027	1.33931	Condition 1	Condition 2	CD59 glycoprotein OS=Homo sapiens GN=CD59 PE=1 SV=1	4.46602e+07	4.77801e+07	5.10861e+07	4.78421e+07	0.0671672	3.48875e+07	3.48333e+07	3.74436e+07	3.57215e+07	0.0417582	0.746653	0.35456	0.00406358	-0.42149	7.94303
Q15942	2	2	50.54	0.00496881	1.51075	Condition 1	Condition 2	Zyxin OS=Homo sapiens GN=ZYX PE=1 SV=1	4.10359e+07	3.60118e+07	3.75255e+07	3.81911e+07	0.0674852	2.80704e+07	2.25514e+07	2.52167e+07	2.52795e+07	0.109179	0.661921	0.931631	0.00407279	-0.595268	7.93977
P21399	13	13	905.42	0.00309021	1.28598	Condition 1	Condition 2	Cytoplasmic aconitate hydratase OS=Homo sapiens GN=ACO1 PE=1 SV=3	3.43124e+08	3.82681e+08	3.84202e+08	3.70002e+08	0.0629457	2.89363e+08	2.80683e+08	2.93116e+08	2.87721e+08	0.0221649	0.777618	0.139496	0.00412395	-0.362866	7.92176
Q9UBI1	1	1	37.02	0.00515581	1.18703	Condition 1	Condition 2	COMM domain-containing protein 3 OS=Homo sapiens GN=COMMD3 PE=1 SV=1	7.7504e+06	7.49161e+06	7.53047e+06	7.59083e+06	0.018385	6.07839e+06	6.38143e+06	6.72456e+06	6.39479e+06	0.0505557	0.842437	0.314145	0.00417251	-0.247359	7.90487
Q07065	6	6	277.04	0.00388959	1.32546	Condition 1	Condition 2	Cytoskeleton-associated protein 4 OS=Homo sapiens GN=CKAP4 PE=1 SV=2	8.04113e+07	7.30911e+07	8.18511e+07	7.84511e+07	0.0598771	5.91028e+07	5.60419e+07	6.24191e+07	5.91879e+07	0.0538874	0.754456	0.631093	0.00419012	-0.406492	7.89879
P51858	5	5	200.21	0.00407202	1.49274	Condition 1	Condition 2	Hepatoma-derived growth factor OS=Homo sapiens GN=HDGF PE=1 SV=1	1.12591e+08	1.13202e+08	1.28898e+08	1.1823e+08	0.0781844	8.30577e+07	7.12922e+07	8.32611e+07	7.92037e+07	0.0865148	0.66991	0.709268	0.00419455	-0.577961	7.89727
P07996	2	2	108.03	0.00795812	1.78971	Condition 2	Condition 1	Thrombospondin-1 OS=Homo sapiens GN=THBS1 PE=1 SV=2	1.06862e+07	7.39551e+06	7.6743e+06	8.58533e+06	0.21254	1.57221e+07	1.59448e+07	1.44288e+07	1.53652e+07	0.0532746	1.78971	0.33506	0.0042018	0.839723	7.89478
O43707	33	21	2899.45	0.00368958	1.27357	Condition 1	Condition 2	Alpha-actinin-4 OS=Homo sapiens GN=ACTN4 PE=1 SV=2	1.1312e+09	1.1038e+09	1.21934e+09	1.15145e+09	0.0524343	9.49192e+08	8.68658e+08	8.94471e+08	9.04107e+08	0.0454842	0.785193	0.633806	0.00422074	-0.348881	7.88829
Q99714	6	6	485.86	4.69897e-05	1.89134	Condition 1	Condition 2	3-hydroxyacyl-CoA dehydrogenase type-2 OS=Homo sapiens GN=HSD17B10 PE=1 SV=3	1.74599e+08	1.76847e+08	1.93644e+08	1.81697e+08	0.0572797	9.76827e+07	9.58208e+07	9.46987e+07	9.60674e+07	0.0156893	0.528724	0.0410845	0.00422363	-0.919412	7.8873
P54819	3	3	116.31	0.00202526	1.90691	Condition 1	Condition 2	Adenylate kinase 2, mitochondrial OS=Homo sapiens GN=AK2 PE=1 SV=2	3.58419e+07	4.40609e+07	4.69832e+07	4.22953e+07	0.136579	2.06738e+07	2.3443e+07	2.24233e+07	2.218e+07	0.0631454	0.524408	0.111039	0.00422887	-0.931239	7.88551
P22392	5	1	224.52	0.0035674	1.39821	Condition 2	Condition 1	Nucleoside diphosphate kinase B OS=Homo sapiens GN=NME2 PE=1 SV=1	8.62549e+07	8.61492e+07	9.53533e+07	8.92525e+07	0.0592003	1.33065e+08	1.14946e+08	1.2637e+08	1.24794e+08	0.0734135	1.39821	0.499197	0.00433802	0.483584	7.84875
O94903	2	2	36.18	0.00281914	1.6038	Condition 1	Condition 2	Proline synthase co-transcribed bacterial homolog protein OS=Homo sapiens GN=PROSC PE=1 SV=1	1.06305e+07	8.85483e+06	1.08069e+07	1.00974e+07	0.106928	6.57497e+06	5.90024e+06	6.41256e+06	6.29592e+06	0.0559345	0.62352	0.192309	0.00440099	-0.681492	7.82796
P07910	3	3	100.78	0.00772828	1.63035	Condition 1	Condition 2	Heterogeneous nuclear ribonucleoproteins C1/C2 OS=Homo sapiens GN=HNRNPC PE=1 SV=4	2.50782e+07	2.73658e+07	2.86381e+07	2.70274e+07	0.0667447	1.87313e+07	1.37621e+07	1.72395e+07	1.65777e+07	0.153812	0.613366	0.667119	0.00440934	-0.70518	7.82522
P62258	14	11	1183.5	0.00327994	1.3196	Condition 1	Condition 2	14-3-3 protein epsilon OS=Homo sapiens GN=YWHAE PE=1 SV=1	1.37748e+09	1.40719e+09	1.55577e+09	1.44682e+09	0.066021	1.09812e+09	1.05198e+09	1.1391e+09	1.0964e+09	0.0397554	0.757803	0.344683	0.00444862	-0.400106	7.81243
P23526	6	6	398.84	0.00372564	1.18795	Condition 1	Condition 2	Adenosylhomocysteinase OS=Homo sapiens GN=AHCY PE=1 SV=4	1.78922e+08	1.69216e+08	1.84676e+08	1.77605e+08	0.0439948	1.46184e+08	1.49901e+08	1.5243e+08	1.49505e+08	0.0210164	0.841785	0.278388	0.00445285	-0.248476	7.81106
Q15382	1	1	14.37	0.00637259	1.44807	Condition 2	Condition 1	GTP-binding protein Rheb OS=Homo sapiens GN=RHEB PE=1 SV=1	1.55871e+06	1.28368e+06	1.53842e+06	1.46027e+06	0.104959	2.19027e+06	2.18e+06	1.97342e+06	2.11456e+06	0.0578549	1.44807	0.778334	0.00445352	0.534127	7.81084
P05455	2	2	68.76	0.00326629	1.43421	Condition 1	Condition 2	Lupus La protein OS=Homo sapiens GN=SSB PE=1 SV=2	1.17843e+07	1.3766e+07	1.23308e+07	1.2627e+07	0.0810557	8.36388e+06	8.67095e+06	9.37764e+06	8.80416e+06	0.0590454	0.697247	0.410143	0.00448395	-0.520259	7.80101
O15075	1	1	45.6	1.7747e-05	3.27761	Condition 1	Condition 2	Serine/threonine-protein kinase DCLK1 OS=Homo sapiens GN=DCLK1 PE=1 SV=2	425771	502330	461063	463055	0.0827512	138431	144400	141003	141278	0.021192	0.3051	0.0121357	0.00449439	-1.71264	7.79766
P35606	1	1	79.7	0.00291423	1.30336	Condition 1	Condition 2	Coatomer subunit beta' OS=Homo sapiens GN=COPB2 PE=1 SV=2	1.31958e+07	1.1685e+07	1.18453e+07	1.2242e+07	0.0677894	9.51174e+06	9.14737e+06	9.51901e+06	9.3927e+06	0.0226239	0.76725	0.123065	0.00450398	-0.382231	7.79458
Q9Y3I0	5	5	175.58	0.00348878	1.44043	Condition 1	Condition 2	tRNA-splicing ligase RtcB homolog OS=Homo sapiens GN=C22orf28 PE=1 SV=1	4.42969e+07	3.75145e+07	4.14597e+07	4.10904e+07	0.0828972	2.9807e+07	2.66773e+07	2.90949e+07	2.85264e+07	0.0575077	0.694235	0.376551	0.00451855	-0.526503	7.78993
Q13363	1	1	15.71	0.00404015	1.61168	Condition 1	Condition 2	C-terminal-binding protein 1 OS=Homo sapiens GN=CTBP1 PE=1 SV=2	7.87081e+06	6.70468e+06	8.01899e+06	7.53149e+06	0.095581	5.2182e+06	4.37213e+06	4.42889e+06	4.67308e+06	0.101206	0.620471	0.602996	0.00454113	-0.688563	7.78273
P01031	7	7	332.86	0.00585356	1.22553	Condition 2	Condition 1	Complement C5 OS=Homo sapiens GN=C5 PE=1 SV=4	6.32443e+07	5.58153e+07	5.85891e+07	5.92162e+07	0.0633944	7.09468e+07	7.3021e+07	7.37451e+07	7.2571e+07	0.0200137	1.22553	0.260403	0.00454505	0.2934	7.78149
P61978	8	7	622.46	0.00182927	1.77867	Condition 1	Condition 2	Heterogeneous nuclear ribonucleoprotein K OS=Homo sapiens GN=HNRNPK PE=1 SV=1	3.03828e+08	3.23556e+08	3.8787e+08	3.38418e+08	0.129864	2.00276e+08	1.84199e+08	1.86319e+08	1.90265e+08	0.0459083	0.562218	0.0760014	0.00460237	-0.830798	7.76341
Q96AB3	1	1	118.03	2.32684e-05	2.69621	Condition 1	Condition 2	Isochorismatase domain-containing protein 2, mitochondrial OS=Homo sapiens GN=ISOC2 PE=1 SV=1	9.59172e+06	1.04788e+07	1.11526e+07	1.04077e+07	0.0752216	3.86909e+06	3.82036e+06	3.89094e+06	3.86013e+06	0.00936068	0.370891	0.00425138	0.00466063	-1.43093	7.74526
P39060	4	4	168.15	0.00421315	1.21451	Condition 2	Condition 1	Collagen alpha-1(XVIII) chain OS=Homo sapiens GN=COL18A1 PE=1 SV=5	3.09985e+07	2.93036e+07	2.88653e+07	2.97225e+07	0.037903	3.78336e+07	3.47633e+07	3.56979e+07	3.60983e+07	0.0435994	1.21451	0.677574	0.00466518	0.280375	7.74385
P18428	2	2	125.02	0.0083689	1.40203	Condition 2	Condition 1	Lipopolysaccharide-binding protein OS=Homo sapiens GN=LBP PE=1 SV=3	1.17041e+07	1.34044e+07	1.49205e+07	1.3343e+07	0.120595	1.88751e+07	1.88491e+07	1.83975e+07	1.87072e+07	0.0143564	1.40203	0.0542053	0.00469564	0.487515	7.73446
Q13765	3	3	267.55	0.00303222	1.42414	Condition 1	Condition 2	Nascent polypeptide-associated complex subunit alpha OS=Homo sapiens GN=NACA PE=1 SV=1	7.58985e+07	7.42118e+07	8.65295e+07	7.88799e+07	0.0846628	5.59595e+07	5.26041e+07	5.75997e+07	5.53878e+07	0.045974	0.702179	0.253869	0.00470245	-0.51009	7.73237
Q08211	2	2	93.34	0.00289812	1.43587	Condition 1	Condition 2	ATP-dependent RNA helicase A OS=Homo sapiens GN=DHX9 PE=1 SV=4	1.11377e+07	9.41234e+06	9.89448e+06	1.01482e+07	0.0877224	7.39379e+06	6.99432e+06	6.81471e+06	7.06761e+06	0.0419404	0.696441	0.199609	0.00472157	-0.521927	7.72652
P61019	4	4	202.1	0.00333367	1.36499	Condition 2	Condition 1	Ras-related protein Rab-2A OS=Homo sapiens GN=RAB2A PE=1 SV=1	6.46344e+07	6.26899e+07	6.85319e+07	6.52854e+07	0.0455678	9.67675e+07	8.50713e+07	8.55029e+07	8.91139e+07	0.0744187	1.36499	0.33504	0.00474711	0.44889	7.71873
Q15363	1	1	70.58	0.00320457	1.29919	Condition 1	Condition 2	Transmembrane emp24 domain-containing protein 2 OS=Homo sapiens GN=TMED2 PE=1 SV=1	3.65894e+06	3.37718e+06	3.19221e+06	3.40944e+06	0.0689362	2.61971e+06	2.5752e+06	2.67793e+06	2.62428e+06	0.0196303	0.769709	0.0916774	0.00482772	-0.377615	7.69444
Q969G5	4	4	171.24	0.00515163	1.52179	Condition 2	Condition 1	Protein kinase C delta-binding protein OS=Homo sapiens GN=PRKCDBP PE=1 SV=3	9.42313e+07	1.08894e+08	1.14961e+08	1.06029e+08	0.100517	1.60726e+08	1.74865e+08	1.48467e+08	1.61353e+08	0.0818703	1.52179	0.788547	0.00484752	0.605765	7.68854
Q9H2U2	1	1	45.38	0.002427	1.9465	Condition 1	Condition 2	Inorganic pyrophosphatase 2, mitochondrial OS=Homo sapiens GN=PPA2 PE=1 SV=2	4.72423e+07	3.54104e+07	4.17065e+07	4.14531e+07	0.142812	2.27379e+07	1.92875e+07	2.18633e+07	2.12962e+07	0.0842283	0.513744	0.168176	0.00485249	-0.960879	7.68706
P36405	2	2	59.43	0.00447775	1.44383	Condition 1	Condition 2	ADP-ribosylation factor-like protein 3 OS=Homo sapiens GN=ARL3 PE=1 SV=2	1.33265e+07	1.40151e+07	1.54141e+07	1.42519e+07	0.0746392	1.08223e+07	9.3252e+06	9.46526e+06	9.87091e+06	0.0837679	0.692603	0.753282	0.00489012	-0.5299	7.67591
Q96FV2	6	6	502.09	5.64465e-05	2.047	Condition 1	Condition 2	Secernin-2 OS=Homo sapiens GN=SCRN2 PE=2 SV=3	1.97273e+08	1.90736e+08	2.16685e+08	2.01565e+08	0.0669586	9.64665e+07	9.86278e+07	1.0031e+08	9.84681e+07	0.0195676	0.488519	0.0399477	0.00494333	-1.03351	7.6603
Q06830	10	7	683.76	0.00471449	1.25789	Condition 1	Condition 2	Peroxiredoxin-1 OS=Homo sapiens GN=PRDX1 PE=1 SV=1	1.42603e+09	1.31901e+09	1.45832e+09	1.40112e+09	0.0520425	1.1521e+09	1.05681e+09	1.13269e+09	1.11387e+09	0.0452102	0.794982	0.645856	0.00494556	-0.331006	7.65965
O43837	2	2	96.66	0.00312355	1.45962	Condition 1	Condition 2	Isocitrate dehydrogenase [NAD] subunit beta, mitochondrial OS=Homo sapiens GN=IDH3B PE=1 SV=2	1.78149e+07	1.55936e+07	1.88021e+07	1.74035e+07	0.0944251	1.19468e+07	1.15057e+07	1.23174e+07	1.19233e+07	0.0340812	0.685108	0.115246	0.00496896	-0.545596	7.65284
P51911	2	2	45.11	0.00188288	3.65825	Condition 1	Condition 2	Calponin-1 OS=Homo sapiens GN=CNN1 PE=1 SV=2	2.07619e+07	2.30453e+07	3.10924e+07	2.49665e+07	0.217354	5.18663e+06	7.9152e+06	7.37231e+06	6.82471e+06	0.211637	0.273354	0.132313	0.00500612	-1.87116	7.64209
P51888	11	11	902.21	0.00292042	1.43285	Condition 1	Condition 2	Prolargin OS=Homo sapiens GN=PRELP PE=1 SV=1	1.37822e+09	1.375e+09	1.6016e+09	1.4516e+09	0.0894935	9.99673e+08	9.82106e+08	1.05748e+09	1.01309e+09	0.0389262	0.697908	0.16875	0.00500967	-0.518892	7.64107
Q92499	1	1	42.52	0.00770304	1.59891	Condition 1	Condition 2	ATP-dependent RNA helicase DDX1 OS=Homo sapiens GN=DDX1 PE=1 SV=2	6.74703e+06	7.70019e+06	7.23056e+06	7.22593e+06	0.065957	4.45374e+06	3.86441e+06	5.23973e+06	4.51929e+06	0.152679	0.625428	0.645996	0.00502357	-0.677085	7.63707
P43121	11	11	771.85	0.00588004	1.33482	Condition 2	Condition 1	Cell surface glycoprotein MUC18 OS=Homo sapiens GN=MCAM PE=1 SV=2	4.71452e+08	5.05435e+08	5.52089e+08	5.09658e+08	0.0794336	6.87528e+08	6.43199e+08	7.10182e+08	6.80303e+08	0.050082	1.33482	0.829226	0.00503801	0.416647	7.63293
P31939	7	7	665.08	0.00552936	1.16758	Condition 1	Condition 2	Bifunctional purine biosynthesis protein PURH OS=Homo sapiens GN=ATIC PE=1 SV=3	1.04029e+08	1.01202e+08	1.06439e+08	1.0389e+08	0.0252285	8.60741e+07	8.7562e+07	9.33015e+07	8.89792e+07	0.0428913	0.856475	0.640978	0.00506282	-0.223516	7.62584
P04259	6	1	401.37	0.00276197	2.53324	Condition 2	Condition 1	Keratin, type II cytoskeletal 6B OS=Homo sapiens GN=KRT6B PE=1 SV=5	2.33588e+06	2.47918e+06	3.13032e+06	2.64846e+06	0.159871	5.34137e+06	7.52667e+06	7.25954e+06	6.70919e+06	0.177677	2.53324	0.224053	0.00512386	1.34099	7.60855
Q9NVS9	1	1	53.3	0.00383712	1.50388	Condition 1	Condition 2	Pyridoxine-5'-phosphate oxidase OS=Homo sapiens GN=PNPO PE=1 SV=1	8.45685e+06	7.0425e+06	8.22332e+06	7.90756e+06	0.0958837	5.57581e+06	4.91943e+06	5.27909e+06	5.25811e+06	0.0625115	0.664948	0.316405	0.00514652	-0.588687	7.60219
Q7L2K0	1	1	14.65	0.00261641	1.50522	Condition 1	Condition 2	Uncharacterized protein C16orf59 OS=Homo sapiens GN=C16orf59 PE=2 SV=1	5.075e+06	5.25922e+06	6.13727e+06	5.4905e+06	0.103387	3.75164e+06	3.53632e+06	3.65495e+06	3.64763e+06	0.0295663	0.664354	0.069678	0.00524398	-0.589976	7.57512
Q9NZN4	23	22	2047.57	0.0051053	1.10478	Condition 2	Condition 1	EH domain-containing protein 2 OS=Homo sapiens GN=EHD2 PE=1 SV=2	5.72791e+09	5.61605e+09	5.51389e+09	5.61928e+09	0.0190498	6.28481e+09	6.03445e+09	6.30493e+09	6.20806e+09	0.0242726	1.10478	0.670795	0.00526826	0.143757	7.56846
P42704	2	2	75.5	0.00659782	1.57693	Condition 1	Condition 2	Leucine-rich PPR motif-containing protein, mitochondrial OS=Homo sapiens GN=LRPPRC PE=1 SV=3	8.21659e+06	8.15683e+06	9.38966e+06	8.58769e+06	0.0809488	4.69495e+06	5.56157e+06	6.08093e+06	5.44581e+06	0.128576	0.634142	0.992779	0.00527474	-0.657123	7.56669
P14314	7	7	470.73	0.00440878	1.30492	Condition 1	Condition 2	Glucosidase 2 subunit beta OS=Homo sapiens GN=PRKCSH PE=1 SV=2	3.38812e+08	3.02535e+08	3.41667e+08	3.27671e+08	0.0665769	2.6234e+08	2.42074e+08	2.48901e+08	2.51105e+08	0.0410617	0.766331	0.365196	0.00534173	-0.38396	7.54848
P05387	3	3	372.17	0.00378509	1.34928	Condition 1	Condition 2	60S acidic ribosomal protein P2 OS=Homo sapiens GN=RPLP2 PE=1 SV=1	1.96189e+08	1.7526e+08	2.04708e+08	1.92053e+08	0.0789028	1.46728e+08	1.38498e+08	1.41785e+08	1.42337e+08	0.0291056	0.741136	0.139088	0.00539377	-0.432191	7.53449
P35237	8	8	276.24	0.00538719	1.3082	Condition 1	Condition 2	Serpin B6 OS=Homo sapiens GN=SERPINB6 PE=1 SV=3	2.72734e+08	2.43991e+08	2.63299e+08	2.60008e+08	0.0563498	1.90953e+08	2.13466e+08	1.9184e+08	1.98753e+08	0.0641494	0.76441	0.861875	0.0054606	-0.387581	7.51672
P23246	3	3	105.39	0.00492842	1.9235	Condition 1	Condition 2	Splicing factor, proline- and glutamine-rich OS=Homo sapiens GN=SFPQ PE=1 SV=2	4.59548e+07	4.80393e+07	5.83751e+07	5.07898e+07	0.130957	2.18529e+07	2.83546e+07	2.9007e+07	2.64048e+07	0.149805	0.519885	0.522548	0.00547813	-0.943735	7.5121
Q9H845	2	2	200.11	0.00699239	1.21394	Condition 1	Condition 2	Acyl-CoA dehydrogenase family member 9, mitochondrial OS=Homo sapiens GN=ACAD9 PE=1 SV=1	1.70197e+07	1.66384e+07	1.75871e+07	1.70817e+07	0.0279489	1.45382e+07	1.31136e+07	1.45622e+07	1.40713e+07	0.0589496	0.823764	0.497659	0.0055136	-0.279697	7.50279
P62829	1	1	43.63	0.00607251	1.41869	Condition 1	Condition 2	60S ribosomal protein L23 OS=Homo sapiens GN=RPL23 PE=1 SV=1	2.60321e+07	2.71496e+07	2.35747e+07	2.55855e+07	0.0714791	1.89674e+07	1.88972e+07	1.6239e+07	1.80346e+07	0.0862435	0.704875	0.839436	0.00551516	-0.50456	7.50238
Q15084	6	6	745.44	0.00697281	1.26981	Condition 1	Condition 2	Protein disulfide-isomerase A6 OS=Homo sapiens GN=PDIA6 PE=1 SV=1	3.23427e+08	3.06445e+08	3.13877e+08	3.14583e+08	0.0270611	2.70089e+08	2.34388e+08	2.38741e+08	2.47739e+08	0.0786203	0.787518	0.32078	0.00551883	-0.344616	7.50142
P14927	2	2	167.14	0.00242765	2.50908	Condition 1	Condition 2	Cytochrome b-c1 complex subunit 7 OS=Homo sapiens GN=UQCRB PE=1 SV=2	2.09542e+07	2.85313e+07	3.01759e+07	2.65538e+07	0.185232	1.17735e+07	9.22026e+06	1.07555e+07	1.05831e+07	0.12145	0.398552	0.127842	0.00553849	-1.32716	7.49629
O95150	1	1	15.53	0.00571615	1.18666	Condition 1	Condition 2	Tumor necrosis factor ligand superfamily member 15 OS=Homo sapiens GN=TNFSF15 PE=1 SV=2	1.53137e+07	1.47499e+07	1.42332e+07	1.47656e+07	0.0366023	1.29476e+07	1.24541e+07	1.19274e+07	1.2443e+07	0.041001	0.842703	0.94241	0.00564421	-0.246903	7.46901
Q9H0W9	1	1	33.48	0.00455446	1.29882	Condition 1	Condition 2	Ester hydrolase C11orf54 OS=Homo sapiens GN=C11orf54 PE=1 SV=1	8.30236e+06	7.59516e+06	8.67578e+06	8.1911e+06	0.0670038	6.5779e+06	6.08093e+06	6.26095e+06	6.30659e+06	0.039897	0.769932	0.34735	0.00566875	-0.377196	7.46275
P02792	2	2	152.79	0.0020256	2.388	Condition 2	Condition 1	Ferritin light chain OS=Homo sapiens GN=FTL PE=1 SV=2	8.25595e+06	6.88869e+06	7.63337e+06	7.59267e+06	0.0901577	1.46785e+07	1.83967e+07	2.13188e+07	1.81313e+07	0.183554	2.388	0.0811786	0.00579868	1.25581	7.43006
Q9Y281	2	1	269.15	0.00679776	1.21495	Condition 1	Condition 2	Cofilin-2 OS=Homo sapiens GN=CFL2 PE=1 SV=1	3.67514e+07	3.66864e+07	3.86058e+07	3.73479e+07	0.0291824	3.04212e+07	2.90883e+07	3.27111e+07	3.07402e+07	0.0596085	0.823078	0.522665	0.00581485	-0.280899	7.42604
O00429	1	1	28.6	0.00274358	1.957	Condition 1	Condition 2	Dynamin-1-like protein OS=Homo sapiens GN=DNM1L PE=1 SV=2	1.14756e+06	1.56535e+06	1.43526e+06	1.38272e+06	0.154614	703860	658735	757069	706554	0.0696653	0.510987	0.100682	0.00593148	-0.968641	7.39739
P30711	1	1	42.82	0.00366354	1.33069	Condition 1	Condition 2	Glutathione S-transferase theta-1 OS=Homo sapiens GN=GSTT1 PE=1 SV=4	1.36352e+07	1.17345e+07	1.21984e+07	1.25227e+07	0.0791328	9.58728e+06	9.44265e+06	9.20201e+06	9.41064e+06	0.0206803	0.751488	0.0742747	0.00593548	-0.412177	7.39642
P07357	1	1	13.79	0.0141097	1.75746	Condition 2	Condition 1	Complement component C8 alpha chain OS=Homo sapiens GN=C8A PE=1 SV=2	4.56237e+06	6.60231e+06	6.96574e+06	6.04347e+06	0.214361	9.79528e+06	1.1208e+07	1.08602e+07	1.06212e+07	0.0693017	1.75746	0.488086	0.00599999	0.813492	7.38082
P61970	4	4	240.34	0.00441578	1.29923	Condition 1	Condition 2	Nuclear transport factor 2 OS=Homo sapiens GN=NUTF2 PE=1 SV=1	6.43604e+07	6.93179e+07	7.42177e+07	6.92987e+07	0.0711218	5.48732e+07	5.15651e+07	5.35764e+07	5.33382e+07	0.0312509	0.769686	0.205279	0.0060329	-0.377658	7.37293
Q9NZ08	8	8	373.99	0.00554464	1.2141	Condition 1	Condition 2	Endoplasmic reticulum aminopeptidase 1 OS=Homo sapiens GN=ERAP1 PE=1 SV=3	1.50703e+08	1.39132e+08	1.52855e+08	1.47563e+08	0.0500145	1.24099e+08	1.16679e+08	1.23848e+08	1.21542e+08	0.0346656	0.823657	0.491602	0.00607268	-0.279884	7.36345
Q9NUJ1	1	1	103.71	0.0035538	1.53148	Condition 1	Condition 2	Abhydrolase domain-containing protein 10, mitochondrial OS=Homo sapiens GN=ABHD10 PE=1 SV=1	1.45086e+07	1.67801e+07	1.8107e+07	1.64652e+07	0.110521	1.12367e+07	1.04741e+07	1.05427e+07	1.07512e+07	0.0392404	0.652963	0.102012	0.00609474	-0.614927	7.35822
Q13510	5	5	123.48	0.00664328	1.10415	Condition 2	Condition 1	Acid ceramidase OS=Homo sapiens GN=ASAH1 PE=1 SV=5	1.05156e+08	1.11212e+08	1.08808e+08	1.08392e+08	0.0281322	1.20992e+08	1.1727e+08	1.20779e+08	1.19681e+08	0.0174633	1.10415	0.639258	0.00613284	0.14293	7.34923
Q9UL46	3	3	64.85	0.00697595	1.57015	Condition 1	Condition 2	Proteasome activator complex subunit 2 OS=Homo sapiens GN=PSME2 PE=1 SV=4	1.76713e+08	2.07968e+08	1.8524e+08	1.89974e+08	0.0850438	1.06871e+08	1.38163e+08	1.17939e+08	1.20991e+08	0.131147	0.63688	0.981984	0.00618559	-0.650906	7.33687
P42167	3	3	150.99	0.00810468	1.51721	Condition 1	Condition 2	Lamina-associated polypeptide 2, isoforms beta/gamma OS=Homo sapiens GN=TMPO PE=1 SV=2	4.03813e+07	3.90399e+07	3.49381e+07	3.81198e+07	0.0743937	2.82832e+07	2.51973e+07	2.1894e+07	2.51249e+07	0.127174	0.659103	0.881254	0.00621867	-0.601424	7.32918
O00487	2	2	40.99	0.00880092	1.33055	Condition 1	Condition 2	26S proteasome non-ATPase regulatory subunit 14 OS=Homo sapiens GN=PSMD14 PE=1 SV=1	1.68983e+07	1.7478e+07	1.7441e+07	1.72724e+07	0.0187893	1.45675e+07	1.21167e+07	1.22602e+07	1.29815e+07	0.10595	0.751572	0.105482	0.00625761	-0.412018	7.32017
Q8NHV1	1	1	28.93	0.00538953	1.33795	Condition 1	Condition 2	GTPase IMAP family member 7 OS=Homo sapiens GN=GIMAP7 PE=2 SV=1	1.91426e+06	2.06134e+06	2.21034e+06	2.06198e+06	0.0717963	1.4453e+06	1.56342e+06	1.61471e+06	1.54114e+06	0.0563715	0.74741	0.512322	0.0062737	-0.420027	7.31647
P61201	1	1	33.92	0.00623346	1.6192	Condition 1	Condition 2	COP9 signalosome complex subunit 2 OS=Homo sapiens GN=COPS2 PE=1 SV=1	4.83348e+06	4.41006e+06	5.36008e+06	4.86788e+06	0.0977723	2.71048e+06	3.44601e+06	2.86257e+06	3.00635e+06	0.129151	0.61759	0.799181	0.00630041	-0.695278	7.31034
P04632	5	5	341.06	0.00562848	1.24771	Condition 1	Condition 2	Calpain small subunit 1 OS=Homo sapiens GN=CAPNS1 PE=1 SV=1	1.57632e+08	1.41358e+08	1.55022e+08	1.51337e+08	0.0577531	1.18242e+08	1.18804e+08	1.26829e+08	1.21292e+08	0.0396069	0.801466	0.464028	0.0064367	-0.319286	7.27946
O75054	1	1	15.16	0.00573516	1.45052	Condition 2	Condition 1	Immunoglobulin superfamily member 3 OS=Homo sapiens GN=IGSF3 PE=1 SV=3	2.80652e+07	3.15255e+07	2.65407e+07	2.87105e+07	0.0889666	3.98895e+07	4.563e+07	3.94162e+07	4.16452e+07	0.0830589	1.45052	0.705749	0.00647033	0.536575	7.27195
P07339	7	7	577.74	0.0042586	1.3141	Condition 1	Condition 2	Cathepsin D OS=Homo sapiens GN=CTSD PE=1 SV=1	3.93297e+08	3.92234e+08	4.46924e+08	4.10818e+08	0.0761238	3.11091e+08	3.04074e+08	3.22708e+08	3.12624e+08	0.0301047	0.76098	0.166092	0.00648171	-0.39407	7.26941
Q16795	4	4	97.07	0.00821296	1.23644	Condition 1	Condition 2	NADH dehydrogenase [ubiquinone] 1 alpha subcomplex subunit 9, mitochondrial OS=Homo sapiens GN=NDUFA9 PE=1 SV=2	1.54211e+07	1.64212e+07	1.62485e+07	1.60303e+07	0.0333469	1.31973e+07	1.20028e+07	1.36944e+07	1.29648e+07	0.0670619	0.80877	0.548638	0.00650628	-0.306198	7.26395
P32119	9	8	786.25	0.00648536	1.2135	Condition 2	Condition 1	Peroxiredoxin-2 OS=Homo sapiens GN=PRDX2 PE=1 SV=5	1.82993e+09	1.98617e+09	1.96439e+09	1.92683e+09	0.0439155	2.3683e+09	2.21863e+09	2.42767e+09	2.3382e+09	0.0460714	1.2135	0.763153	0.0065098	0.279168	7.26317
P01612	1	1	18.68	0.00785322	1.45056	Condition 2	Condition 1	Ig kappa chain V-I region Mev OS=Homo sapiens PE=1 SV=1	1.26608e+07	1.24369e+07	1.53521e+07	1.34832e+07	0.120322	1.90487e+07	1.8684e+07	2.09419e+07	1.95582e+07	0.0619753	1.45056	0.716495	0.0065352	0.536606	7.25755
P68036	1	1	150.58	0.00159554	2.20564	Condition 1	Condition 2	Ubiquitin-conjugating enzyme E2 L3 OS=Homo sapiens GN=UBE2L3 PE=1 SV=1	6.44493e+06	6.54182e+06	6.40292e+06	6.46322e+06	0.0110217	2.92824e+06	3.45856e+06	2.40414e+06	2.93032e+06	0.179917	0.453383	0.0358588	0.00655854	-1.1412	7.25241
P46939	11	11	542.14	0.00502274	1.23665	Condition 1	Condition 2	Utrophin OS=Homo sapiens GN=UTRN PE=1 SV=2	6.16346e+07	5.7362e+07	6.49039e+07	6.13002e+07	0.0616974	5.07708e+07	4.90103e+07	4.89271e+07	4.95694e+07	0.0210069	0.808634	0.140926	0.00660839	-0.306441	7.24149
P07355	24	23	2501.08	0.007565	1.19084	Condition 2	Condition 1	Annexin A2 OS=Homo sapiens GN=ANXA2 PE=1 SV=2	1.87564e+10	2.02978e+10	2.06425e+10	1.98989e+10	0.0504723	2.44432e+10	2.37569e+10	2.2889e+10	2.36964e+10	0.0328689	1.19084	0.751097	0.0066286	0.251976	7.23708
Q9P0J0	1	1	26.97	0.00632734	1.56229	Condition 2	Condition 1	NADH dehydrogenase [ubiquinone] 1 alpha subcomplex subunit 13 OS=Homo sapiens GN=NDUFA13 PE=1 SV=3	3.55764e+06	3.04309e+06	2.8372e+06	3.14598e+06	0.117952	5.44417e+06	4.58847e+06	4.71215e+06	4.91493e+06	0.0940984	1.56229	0.783276	0.00666466	0.643663	7.22925
O60437	4	4	210.91	0.00448777	1.32489	Condition 1	Condition 2	Periplakin OS=Homo sapiens GN=PPL PE=1 SV=4	2.37673e+07	2.55779e+07	2.7881e+07	2.57421e+07	0.0800922	1.97681e+07	1.88611e+07	1.96593e+07	1.94295e+07	0.0254879	0.754777	0.109093	0.00671443	-0.405877	7.21852
P04080	4	4	192.67	0.0050471	1.38924	Condition 1	Condition 2	Cystatin-B OS=Homo sapiens GN=CSTB PE=1 SV=2	2.90943e+08	2.90682e+08	3.3549e+08	3.05705e+08	0.0843779	2.23637e+08	2.05742e+08	2.30778e+08	2.20052e+08	0.05861	0.719819	0.399996	0.00677169	-0.474293	7.20627
Q14247	3	3	138.83	0.00519817	1.32593	Condition 1	Condition 2	Src substrate cortactin OS=Homo sapiens GN=CTTN PE=1 SV=2	2.58389e+07	2.48524e+07	2.86549e+07	2.64487e+07	0.0746059	1.99071e+07	1.90081e+07	2.0927e+07	1.99474e+07	0.0481318	0.75419	0.382851	0.00683126	-0.407	7.19363
P19827	9	9	708.57	0.00552148	1.30234	Condition 2	Condition 1	Inter-alpha-trypsin inhibitor heavy chain H1 OS=Homo sapiens GN=ITIH1 PE=1 SV=3	2.74698e+08	2.62219e+08	2.89259e+08	2.75392e+08	0.0491432	3.86513e+08	3.50021e+08	3.39431e+08	3.58655e+08	0.0688686	1.30234	0.461795	0.00688411	0.381109	7.18251
P12111	20	20	952.11	0.00729751	1.21183	Condition 1	Condition 2	Collagen alpha-3(VI) chain OS=Homo sapiens GN=COL6A3 PE=1 SV=5	4.92975e+08	4.6127e+08	5.02077e+08	4.8544e+08	0.0441277	4.1495e+08	3.78649e+08	4.08155e+08	4.00585e+08	0.0481763	0.825199	0.896025	0.00699469	-0.277187	7.15952
Q16181	6	5	252.84	0.00690121	1.30349	Condition 1	Condition 2	Septin-7 OS=Homo sapiens GN=SEPT7 PE=1 SV=2	2.36922e+08	2.47578e+08	2.67408e+08	2.50636e+08	0.0617304	2.03167e+08	1.78675e+08	1.95e+08	1.92281e+08	0.0648567	0.767171	0.787641	0.00704979	-0.38238	7.1482
Q03135	6	6	441.13	0.00771794	1.40954	Condition 2	Condition 1	Caveolin-1 OS=Homo sapiens GN=CAV1 PE=1 SV=4	3.78494e+08	3.10506e+08	3.33285e+08	3.40761e+08	0.101552	4.6353e+08	4.59413e+08	5.18007e+08	4.80317e+08	0.0680914	1.40954	0.9436	0.00709795	0.495224	7.13838
P07900	29	17	1488.71	0.00471687	1.30171	Condition 1	Condition 2	Heat shock protein HSP 90-alpha OS=Homo sapiens GN=HSP90AA1 PE=1 SV=5	1.0501e+09	1.08741e+09	1.21425e+09	1.11726e+09	0.077019	8.6294e+08	8.76776e+08	8.35189e+08	8.58301e+08	0.0246743	0.768223	0.114225	0.00717392	-0.380403	7.12302
P11166	5	5	184.84	0.0104812	1.43591	Condition 2	Condition 1	Solute carrier family 2, facilitated glucose transporter member 1 OS=Homo sapiens GN=SLC2A1 PE=1 SV=2	6.07193e+07	4.70496e+07	5.47228e+07	5.41639e+07	0.126504	8.20425e+07	7.34597e+07	7.78217e+07	7.77746e+07	0.0551802	1.43591	0.563525	0.00718998	0.521967	7.1198
P40763	3	3	211.83	0.00477136	1.48278	Condition 1	Condition 2	Signal transducer and activator of transcription 3 OS=Homo sapiens GN=STAT3 PE=1 SV=2	3.23345e+07	3.01839e+07	3.69158e+07	3.31448e+07	0.103736	2.30702e+07	2.07847e+07	2.32046e+07	2.23532e+07	0.0608424	0.67441	0.270583	0.00720491	-0.568301	7.1168
A8MZA4	1	1	17.23	0.00827589	1.29459	Condition 1	Condition 2	Putative golgin subfamily A member 6-like protein 6 OS=Homo sapiens GN=GOLGA6L6 PE=5 SV=3	6.73795e+06	6.70821e+06	7.35016e+06	6.93211e+06	0.0522713	4.96552e+06	5.78645e+06	5.3121e+06	5.35469e+06	0.0769646	0.772448	0.871998	0.00760405	-0.37249	7.03902
P01766	2	1	300.65	0.0258665	2.01403	Condition 2	Condition 1	Ig heavy chain V-III region BRO OS=Homo sapiens PE=1 SV=1	4.53269e+08	8.54981e+08	8.42247e+08	7.16832e+08	0.318542	1.5592e+09	1.43067e+09	1.34129e+09	1.44372e+09	0.0758736	2.01403	0.374159	0.00764463	1.01008	7.03134
P46782	1	1	241.94	0.00598727	1.31317	Condition 1	Condition 2	40S ribosomal protein S5 OS=Homo sapiens GN=RPS5 PE=1 SV=4	2.47675e+07	2.72178e+07	2.88995e+07	2.69616e+07	0.0770679	2.01045e+07	1.99672e+07	2.15236e+07	2.05318e+07	0.0419704	0.761518	0.293499	0.00775639	-0.39305	7.0104
Q13683	4	4	145.86	0.00534582	1.50236	Condition 1	Condition 2	Integrin alpha-7 OS=Homo sapiens GN=ITGA7 PE=1 SV=3	5.96824e+07	6.8377e+07	7.44452e+07	6.75015e+07	0.109927	4.50838e+07	4.761e+07	4.20969e+07	4.49302e+07	0.0614233	0.665618	0.243037	0.00782693	-0.587235	6.99734
Q15063	3	3	271.53	0.0069458	1.1936	Condition 1	Condition 2	Periostin OS=Homo sapiens GN=POSTN PE=1 SV=2	3.25528e+07	2.99495e+07	3.00697e+07	3.08573e+07	0.0476249	2.497e+07	2.57059e+07	2.68812e+07	2.58524e+07	0.0372876	0.837802	0.601665	0.00785917	-0.255318	6.99141
P27338	9	7	533.33	0.00624362	1.26807	Condition 1	Condition 2	Amine oxidase [flavin-containing] B OS=Homo sapiens GN=MAOB PE=1 SV=3	1.91062e+08	1.66963e+08	1.8907e+08	1.82365e+08	0.0733446	1.43834e+08	1.46668e+08	1.40937e+08	1.43813e+08	0.0199259	0.7886	0.0877713	0.00815191	-0.342634	6.93865
P00533	1	1	31.82	0.00898622	1.28371	Condition 1	Condition 2	Epidermal growth factor receptor OS=Homo sapiens GN=EGFR PE=1 SV=2	3.36374e+06	3.01641e+06	3.20289e+06	3.19435e+06	0.0544151	2.65527e+06	2.29642e+06	2.51344e+06	2.48838e+06	0.0726317	0.778994	0.961012	0.00818206	-0.360317	6.93332
P67936	12	6	790.05	0.00881045	1.5666	Condition 1	Condition 2	Tropomyosin alpha-4 chain OS=Homo sapiens GN=TPM4 PE=1 SV=3	3.8113e+08	3.31521e+08	3.16677e+08	3.43109e+08	0.0983744	2.23096e+08	2.4517e+08	1.8878e+08	2.19015e+08	0.129743	0.638325	0.82955	0.00821106	-0.647637	6.92822
P30740	3	3	225.91	0.0146669	1.48856	Condition 2	Condition 1	Leukocyte elastase inhibitor OS=Homo sapiens GN=SERPINB1 PE=1 SV=1	6.51778e+07	8.0253e+07	9.01924e+07	7.85411e+07	0.16036	1.20793e+08	1.1085e+08	1.19097e+08	1.16913e+08	0.0454963	1.48856	0.302721	0.00827218	0.573917	6.91752
P61026	1	1	56.47	0.015123	2.56009	Condition 1	Condition 2	Ras-related protein Rab-10 OS=Homo sapiens GN=RAB10 PE=1 SV=1	9.68739e+06	9.22184e+06	6.89502e+06	8.60141e+06	0.173925	4.37484e+06	3.56965e+06	2.13494e+06	3.35981e+06	0.337697	0.390611	0.730318	0.00842869	-1.35619	6.89048
Q96IU4	3	3	199.46	0.00760604	1.47398	Condition 1	Condition 2	Abhydrolase domain-containing protein 14B OS=Homo sapiens GN=ABHD14B PE=1 SV=1	1.15621e+08	1.3801e+08	1.38405e+08	1.30678e+08	0.0998015	9.03403e+07	9.52338e+07	8.03964e+07	8.86569e+07	0.0852793	0.678435	0.503073	0.0084729	-0.559717	6.88293
P40227	4	4	137.87	0.00797273	1.17744	Condition 1	Condition 2	T-complex protein 1 subunit zeta OS=Homo sapiens GN=CCT6A PE=1 SV=3	6.56733e+07	6.75722e+07	7.15236e+07	6.82564e+07	0.0437252	5.56506e+07	5.99683e+07	5.82922e+07	5.79704e+07	0.0375494	0.849304	0.694472	0.00850493	-0.235648	6.87748
P02750	2	2	140.02	0.00821322	1.34294	Condition 2	Condition 1	Leucine-rich alpha-2-glycoprotein OS=Homo sapiens GN=LRG1 PE=1 SV=2	3.47041e+07	3.5879e+07	4.00005e+07	3.68612e+07	0.0754575	5.08992e+07	4.5421e+07	5.21874e+07	4.95026e+07	0.0725811	1.34294	0.74945	0.0085305	0.4254	6.87315
P62942	1	1	30.23	0.0145042	1.4697	Condition 1	Condition 2	Peptidyl-prolyl cis-trans isomerase FKBP1A OS=Homo sapiens GN=FKBP1A PE=1 SV=2	4.17291e+07	4.01653e+07	4.15992e+07	4.11645e+07	0.0210811	2.70926e+07	3.30535e+07	2.38805e+07	2.80089e+07	0.166185	0.680413	0.0671815	0.00856999	-0.555517	6.86649
P51648	5	5	350.1	0.00589178	1.24809	Condition 2	Condition 1	Fatty aldehyde dehydrogenase OS=Homo sapiens GN=ALDH3A2 PE=1 SV=1	8.42112e+07	8.53173e+07	8.68068e+07	8.54451e+07	0.0152439	1.15283e+08	1.03355e+08	1.01291e+08	1.06643e+08	0.0708286	1.24809	0.0577548	0.0087107	0.319718	6.843
P11498	14	14	934.95	4.6475e-05	3.6619	Condition 1	Condition 2	Pyruvate carboxylase, mitochondrial OS=Homo sapiens GN=PC PE=1 SV=2	3.62097e+08	4.08296e+08	4.59084e+08	4.09826e+08	0.118371	1.12406e+08	1.11567e+08	1.11774e+08	1.11916e+08	0.00390432	0.273082	0.000162249	0.00871922	-1.87259	6.84158
Q9Y315	1	1	39.29	0.00772975	1.51425	Condition 1	Condition 2	Putative deoxyribose-phosphate aldolase OS=Homo sapiens GN=DERA PE=1 SV=2	984342	1.10475e+06	906672	998588	0.0999455	617735	742461	618188	659461	0.108999	0.660393	0.683089	0.00880324	-0.598602	6.82775
Q15056	1	1	120.36	0.00505052	1.42787	Condition 1	Condition 2	Eukaryotic translation initiation factor 4H OS=Homo sapiens GN=EIF4H PE=1 SV=5	2.20467e+07	2.20635e+07	2.63468e+07	2.34856e+07	0.105505	1.64793e+07	1.58045e+07	1.70602e+07	1.6448e+07	0.0382058	0.700342	0.120862	0.00885013	-0.513869	6.82009
Q15019	5	5	408.92	0.00960809	1.38442	Condition 1	Condition 2	Septin-2 OS=Homo sapiens GN=SEPT2 PE=1 SV=1	1.60175e+08	1.46089e+08	1.69911e+08	1.58725e+08	0.0754567	1.17203e+08	1.02975e+08	1.23776e+08	1.14651e+08	0.0927398	0.722324	0.881517	0.0088627	-0.469282	6.81804
P17980	7	7	450.48	0.00763462	1.10976	Condition 1	Condition 2	26S protease regulatory subunit 6A OS=Homo sapiens GN=PSMC3 PE=1 SV=3	5.70337e+07	5.33669e+07	5.44267e+07	5.49425e+07	0.0343448	4.97557e+07	4.99319e+07	4.88373e+07	4.95083e+07	0.0118717	0.901093	0.176873	0.00889007	-0.150251	6.81359
Q96DC8	3	3	158.64	0.00378138	2.27018	Condition 1	Condition 2	Enoyl-CoA hydratase domain-containing protein 3, mitochondrial OS=Homo sapiens GN=ECHDC3 PE=1 SV=2	8.91711e+07	1.273e+08	1.31785e+08	1.16085e+08	0.201713	5.61051e+07	4.85987e+07	4.87008e+07	5.11348e+07	0.0841823	0.440494	0.0653803	0.00913689	-1.18281	6.77408
P01617	2	2	350.2	0.0124684	1.36648	Condition 2	Condition 1	Ig kappa chain V-II region TEW OS=Homo sapiens PE=1 SV=1	5.84726e+08	5.63502e+08	7.07625e+08	6.18618e+08	0.12578	8.63818e+08	8.11598e+08	8.60565e+08	8.45327e+08	0.0346085	1.36648	0.247715	0.00914653	0.45046	6.77256
P04792	10	10	719.22	0.0126896	1.34209	Condition 1	Condition 2	Heat shock protein beta-1 OS=Homo sapiens GN=HSPB1 PE=1 SV=2	2.79932e+09	2.54544e+09	2.62746e+09	2.6574e+09	0.0487562	2.15917e+09	2.03524e+09	1.74573e+09	1.98005e+09	0.107156	0.745106	0.543231	0.00917711	-0.424482	6.76774
P17844	1	1	52.91	0.00542921	1.73723	Condition 1	Condition 2	Probable ATP-dependent RNA helicase DDX5 OS=Homo sapiens GN=DDX5 PE=1 SV=1	3.05246e+07	2.27613e+07	2.6245e+07	2.65103e+07	0.146676	1.66805e+07	1.52359e+07	1.3864e+07	1.52601e+07	0.0922949	0.57563	0.231962	0.00922805	-0.796786	6.75976
Q99961	1	1	22.93	0.0134858	1.4829	Condition 1	Condition 2	Endophilin-A2 OS=Homo sapiens GN=SH3GL1 PE=1 SV=1	3.78676e+06	4.11717e+06	3.7899e+06	3.89794e+06	0.0487083	3.10757e+06	2.29098e+06	2.48722e+06	2.62859e+06	0.162161	0.674354	0.331107	0.00922846	-0.568422	6.75969
Q5VTE0	12	12	1048.17	0.000259748	1.42015	Condition 1	Condition 2	Putative elongation factor 1-alpha-like 3 OS=Homo sapiens GN=EEF1A1P5 PE=5 SV=1	2.67208e+09	2.67307e+09	2.91211e+09	2.75242e+09	0.0502449	1.93208e+09	1.93557e+09	1.94669e+09	1.93811e+09	0.0039364	0.704149	0.00606813	0.00931367	-0.506048	6.74643
P62241	4	4	181.57	0.0104872	1.32734	Condition 1	Condition 2	40S ribosomal protein S8 OS=Homo sapiens GN=RPS8 PE=1 SV=2	5.58579e+07	6.17353e+07	6.22935e+07	5.99622e+07	0.0594608	4.97703e+07	4.39988e+07	4.17547e+07	4.51746e+07	0.0915361	0.753384	0.852841	0.00937049	-0.408542	6.73766
Q9NQR4	2	2	105.89	0.000366355	1.24103	Condition 1	Condition 2	Omega-amidase NIT2 OS=Homo sapiens GN=NIT2 PE=1 SV=1	3.47815e+07	3.41524e+07	3.64298e+07	3.51212e+07	0.0334869	2.83211e+07	2.8382e+07	2.81971e+07	2.83001e+07	0.00332955	0.805783	0.0127559	0.00941578	-0.311537	6.7307
Q92616	1	1	105.35	0.0100441	1.29997	Condition 1	Condition 2	Translational activator GCN1 OS=Homo sapiens GN=GCN1L1 PE=1 SV=6	4.49845e+06	4.71547e+06	5.07451e+06	4.76281e+06	0.0610845	3.3634e+06	3.69925e+06	3.92875e+06	3.6638e+06	0.077607	0.769251	0.977065	0.00945286	-0.378473	6.72503
O00170	1	1	29.09	0.00978004	1.44833	Condition 1	Condition 2	AH receptor-interacting protein OS=Homo sapiens GN=AIP PE=1 SV=2	8.66861e+06	7.555e+06	8.89048e+06	8.37137e+06	0.0854866	6.513e+06	5.49657e+06	5.33045e+06	5.78001e+06	0.110761	0.69045	0.889062	0.00948734	-0.534392	6.71978
Q02539	1	1	13.52	0.00558212	1.48636	Condition 1	Condition 2	Histone H1.1 OS=Homo sapiens GN=HIST1H1A PE=1 SV=3	1.13829e+07	1.37594e+07	1.12885e+07	1.21436e+07	0.115296	7.73446e+06	8.65713e+06	8.11838e+06	8.16999e+06	0.0567314	0.672783	0.197531	0.00954244	-0.571787	6.71143
P16083	1	1	86.85	0.00869173	1.34348	Condition 1	Condition 2	Ribosyldihydronicotinamide dehydrogenase [quinone] OS=Homo sapiens GN=NQO2 PE=1 SV=5	1.89621e+07	1.65734e+07	1.67417e+07	1.74257e+07	0.0765061	1.41011e+07	1.21976e+07	1.26131e+07	1.29706e+07	0.0771601	0.744335	0.720858	0.00981513	-0.425976	6.67078
P23219	1	1	33.49	0.0117232	1.13071	Condition 1	Condition 2	Prostaglandin G/H synthase 1 OS=Homo sapiens GN=PTGS1 PE=1 SV=2	1.02614e+07	1.03083e+07	1.05678e+07	1.03792e+07	0.0158999	9.50638e+06	8.70899e+06	9.32253e+06	9.1793e+06	0.0454881	0.884396	0.270205	0.00981588	-0.177235	6.67067
O43488	2	2	37.33	0.00673083	1.26691	Condition 1	Condition 2	Aflatoxin B1 aldehyde reductase member 2 OS=Homo sapiens GN=AKR7A2 PE=1 SV=3	3.17393e+07	3.20539e+07	3.62996e+07	3.33643e+07	0.076338	2.69131e+07	2.56145e+07	2.64781e+07	2.63353e+07	0.0250973	0.789325	0.126186	0.00983073	-0.341309	6.66849
P01765	2	1	354.66	0.00815996	1.44509	Condition 2	Condition 1	Ig heavy chain V-III region TIL OS=Homo sapiens PE=1 SV=1	4.30599e+08	3.62188e+08	4.07531e+08	4.00106e+08	0.0869887	6.43547e+08	5.4002e+08	5.51005e+08	5.78191e+08	0.0983523	1.44509	0.545028	0.00983366	0.531163	6.66806
Q99832	6	6	398.96	0.0134534	1.42208	Condition 1	Condition 2	T-complex protein 1 subunit eta OS=Homo sapiens GN=CCT7 PE=1 SV=2	5.94767e+07	6.47721e+07	6.82499e+07	6.41662e+07	0.0688506	4.96872e+07	4.6828e+07	3.88489e+07	4.51214e+07	0.124488	0.703195	0.764362	0.00991146	-0.508002	6.65669
Q15369	2	2	71.62	0.00614832	1.42813	Condition 1	Condition 2	Transcription elongation factor B polypeptide 1 OS=Homo sapiens GN=TCEB1 PE=1 SV=1	3.34517e+07	2.67814e+07	3.01144e+07	3.01158e+07	0.110745	2.11269e+07	2.0412e+07	2.17238e+07	2.10876e+07	0.031144	0.700215	0.0746578	0.0100285	-0.51413	6.63974
P22352	4	4	233.64	0.00724367	1.41687	Condition 1	Condition 2	Glutathione peroxidase 3 OS=Homo sapiens GN=GPX3 PE=1 SV=2	1.5682e+08	1.81349e+08	1.93686e+08	1.77285e+08	0.105852	1.27828e+08	1.18231e+08	1.29315e+08	1.25125e+08	0.0480806	0.705782	0.186391	0.0101492	-0.502706	6.62249
P62263	3	3	116.99	0.0114622	1.26966	Condition 1	Condition 2	40S ribosomal protein S14 OS=Homo sapiens GN=RPS14 PE=1 SV=3	8.08559e+07	7.56983e+07	7.44142e+07	7.69895e+07	0.044284	6.65876e+07	5.73434e+07	5.79828e+07	6.0638e+07	0.0851357	0.787614	0.607396	0.0102	-0.34444	6.61528
P01857	8	4	1192.17	0.0128187	1.37938	Condition 2	Condition 1	Ig gamma-1 chain C region OS=Homo sapiens GN=IGHG1 PE=1 SV=1	1.2571e+10	1.51246e+10	1.54282e+10	1.43746e+10	0.109171	2.1382e+10	1.9015e+10	1.90874e+10	1.98281e+10	0.0678928	1.37938	0.847839	0.0102726	0.464023	6.60505
P25787	1	1	32.6	0.0070097	1.51576	Condition 1	Condition 2	Proteasome subunit alpha type-2 OS=Homo sapiens GN=PSMA2 PE=1 SV=2	1.75669e+06	1.60455e+06	1.37591e+06	1.57905e+06	0.12138	974542	1.03799e+06	1.11275e+06	1.04176e+06	0.0664057	0.659736	0.230516	0.0102837	-0.600039	6.6035
P42229	2	2	140.79	0.0115732	1.51092	Condition 1	Condition 2	Signal transducer and activator of transcription 5A OS=Homo sapiens GN=STAT5A PE=1 SV=1	1.1565e+07	1.39179e+07	1.31244e+07	1.28691e+07	0.0930162	7.44881e+06	9.71208e+06	8.39132e+06	8.5174e+06	0.133478	0.66185	0.948495	0.0102947	-0.595425	6.60196
Q14203	2	2	80.09	0.0117849	1.49313	Condition 1	Condition 2	Dynactin subunit 1 OS=Homo sapiens GN=DCTN1 PE=1 SV=3	5.80529e+06	7.02739e+06	6.49745e+06	6.44337e+06	0.0951116	4.68015e+06	4.55439e+06	3.71146e+06	4.31533e+06	0.122061	0.669732	0.849738	0.0103296	-0.578344	6.59707
Q6IS14	2	2	82.34	0.0129772	1.26127	Condition 1	Condition 2	Eukaryotic translation initiation factor 5A-1-like OS=Homo sapiens GN=EIF5AL1 PE=1 SV=2	1.38885e+08	1.44534e+08	1.45858e+08	1.43092e+08	0.0258814	1.25723e+08	1.08013e+08	1.06617e+08	1.13451e+08	0.0938809	0.79285	0.215725	0.0103943	-0.33488	6.58806
P11586	13	13	667.17	0.00910262	1.44572	Condition 1	Condition 2	C-1-tetrahydrofolate synthase, cytoplasmic OS=Homo sapiens GN=MTHFD1 PE=1 SV=3	4.04883e+08	4.34605e+08	4.92246e+08	4.43912e+08	0.100062	3.30106e+08	2.76525e+08	3.14528e+08	3.07053e+08	0.0897612	0.691699	0.55597	0.0105402	-0.531784	6.56795
P52895	8	3	558.5	0.0124599	1.52201	Condition 2	Condition 1	Aldo-keto reductase family 1 member C2 OS=Homo sapiens GN=AKR1C2 PE=1 SV=3	1.0781e+08	1.14164e+08	1.42535e+08	1.21503e+08	0.152171	1.69202e+08	2.00733e+08	1.8485e+08	1.84928e+08	0.0852524	1.52201	0.84198	0.0106488	0.605977	6.55316
P10768	5	5	178.96	0.0134023	1.37958	Condition 1	Condition 2	S-formylglutathione hydrolase OS=Homo sapiens GN=ESD PE=1 SV=2	4.34151e+07	4.84074e+07	4.88484e+07	4.68903e+07	0.064356	3.39779e+07	3.00769e+07	3.79113e+07	3.39887e+07	0.115249	0.724856	0.744879	0.010665	-0.464234	6.55097
Q9UBQ7	3	3	389.11	0.00690517	1.35842	Condition 1	Condition 2	Glyoxylate reductase/hydroxypyruvate reductase OS=Homo sapiens GN=GRHPR PE=1 SV=1	1.18474e+08	1.30979e+08	1.44645e+08	1.31366e+08	0.0996433	9.93262e+07	9.48415e+07	9.59473e+07	9.6705e+07	0.0241599	0.73615	0.0617501	0.010699	-0.441928	6.54638
Q9H668	1	1	16.01	0.0100394	1.17982	Condition 2	Condition 1	CST complex subunit STN1 OS=Homo sapiens GN=OBFC1 PE=1 SV=2	7.96808e+07	8.0549e+07	8.57567e+07	8.19955e+07	0.0400763	1.01355e+08	9.2098e+07	9.67675e+07	9.67401e+07	0.0478449	1.17982	0.670255	0.0108303	0.23857	6.52878
P50552	2	2	53.8	0.0109663	1.5204	Condition 1	Condition 2	Vasodilator-stimulated phosphoprotein OS=Homo sapiens GN=VASP PE=1 SV=3	4.92711e+06	4.23356e+06	4.06491e+06	4.40852e+06	0.103652	3.21708e+06	2.97303e+06	2.50865e+06	2.89958e+06	0.124114	0.657722	0.765629	0.0108779	-0.60445	6.52245
P31930	9	9	723.92	0.00600764	1.41698	Condition 1	Condition 2	Cytochrome b-c1 complex subunit 1, mitochondrial OS=Homo sapiens GN=UQCRC1 PE=1 SV=3	2.23582e+08	2.27137e+08	2.72022e+08	2.40914e+08	0.112068	1.75352e+08	1.67624e+08	1.67081e+08	1.70019e+08	0.0272128	0.705725	0.0570576	0.0109664	-0.502823	6.51076
P01860	7	2	769.11	0.0118592	1.21419	Condition 2	Condition 1	Ig gamma-3 chain C region OS=Homo sapiens GN=IGHG3 PE=1 SV=2	5.5291e+08	5.38209e+08	6.09572e+08	5.66897e+08	0.0664701	6.65651e+08	6.79447e+08	7.19868e+08	6.88322e+08	0.0409359	1.21419	0.717252	0.011076	0.279996	6.49642
Q9NWV4	3	3	134.3	0.00988474	1.37538	Condition 1	Condition 2	UPF0587 protein C1orf123 OS=Homo sapiens GN=C1orf123 PE=1 SV=1	3.11274e+07	3.43912e+07	3.728e+07	3.42662e+07	0.0898318	2.52224e+07	2.28615e+07	2.66581e+07	2.4914e+07	0.0769443	0.727073	0.558908	0.011101	-0.459828	6.49317
P10155	2	2	62.01	0.00628881	1.71638	Condition 1	Condition 2	60 kDa SS-A/Ro ribonucleoprotein OS=Homo sapiens GN=TROVE2 PE=1 SV=2	8.75611e+06	1.0986e+07	1.20177e+07	1.05866e+07	0.15747	6.47244e+06	5.72012e+06	6.31132e+06	6.16796e+06	0.0642222	0.58262	0.106886	0.0111045	-0.779373	6.49271
P02647	21	21	1689.89	0.0102109	1.11105	Condition 1	Condition 2	Apolipoprotein A-I OS=Homo sapiens GN=APOA1 PE=1 SV=1	1.55953e+10	1.4617e+10	1.55609e+10	1.52577e+10	0.0363842	1.37953e+10	1.35036e+10	1.38991e+10	1.37327e+10	0.0149339	0.900047	0.240172	0.0111311	-0.151928	6.48926
Q99613	2	2	52.49	0.00144105	1.41425	Condition 1	Condition 2	Eukaryotic translation initiation factor 3 subunit C OS=Homo sapiens GN=EIF3C PE=1 SV=1	1.18462e+07	1.18045e+07	1.18074e+07	1.18193e+07	0.001969	8.99166e+06	7.70717e+06	8.37319e+06	8.35734e+06	0.0768662	0.70709	0.00262139	0.0112034	-0.500033	6.47991
P01763	2	1	119.92	0.0200366	1.52755	Condition 2	Condition 1	Ig heavy chain V-III region WEA OS=Homo sapiens PE=1 SV=1	7.16158e+07	9.51857e+07	1.02963e+08	8.99216e+07	0.181528	1.46986e+08	1.30413e+08	1.34681e+08	1.3736e+08	0.0626483	1.52755	0.434959	0.0112227	0.611222	6.47744
Q8IY63	1	1	13.48	0.000219116	2.04131	Condition 1	Condition 2	Angiomotin-like protein 1 OS=Homo sapiens GN=AMOTL1 PE=1 SV=1	1.4352e+08	1.26365e+08	1.52673e+08	1.40853e+08	0.0948158	6.8507e+07	6.93743e+07	6.91222e+07	6.90012e+07	0.0064655	0.489882	0.00222932	0.0112527	-1.02949	6.47358
P14406	1	1	97.39	0.00866899	1.78259	Condition 1	Condition 2	Cytochrome c oxidase subunit 7A2, mitochondrial OS=Homo sapiens GN=COX7A2 PE=1 SV=1	2.11584e+07	1.57623e+07	2.05801e+07	1.91669e+07	0.154572	9.48689e+06	1.22631e+07	1.05068e+07	1.07523e+07	0.130605	0.56098	0.366914	0.0112875	-0.833978	6.46913
P31937	6	6	418.52	0.00649844	1.63234	Condition 1	Condition 2	3-hydroxyisobutyrate dehydrogenase, mitochondrial OS=Homo sapiens GN=HIBADH PE=1 SV=2	1.16472e+08	1.46763e+08	1.56524e+08	1.3992e+08	0.149259	8.96652e+07	8.29056e+07	8.45802e+07	8.5717e+07	0.0410687	0.612616	0.0552561	0.0113972	-0.706946	6.45518
O94788	1	1	57.07	0.0105508	1.23381	Condition 1	Condition 2	Retinal dehydrogenase 2 OS=Homo sapiens GN=ALDH1A2 PE=1 SV=3	6.06512e+06	6.3876e+06	6.81916e+06	6.42396e+06	0.0588943	5.04456e+06	5.03509e+06	5.54015e+06	5.2066e+06	0.0554876	0.810496	0.73666	0.0114269	-0.303122	6.45143
P16455	1	1	54.05	0.0100339	1.37399	Condition 1	Condition 2	Methylated-DNA--protein-cysteine methyltransferase OS=Homo sapiens GN=MGMT PE=1 SV=1	2.62976e+06	2.2293e+06	2.6357e+06	2.49825e+06	0.0932422	1.95296e+06	1.69674e+06	1.80503e+06	1.81824e+06	0.0707399	0.727806	0.467297	0.0114548	-0.458374	6.4479
Q14103	2	1	148.49	0.00839902	1.40409	Condition 1	Condition 2	Heterogeneous nuclear ribonucleoprotein D0 OS=Homo sapiens GN=HNRNPD PE=1 SV=1	1.40707e+08	1.15104e+08	1.38767e+08	1.31526e+08	0.108382	9.39996e+07	8.9485e+07	9.75361e+07	9.36736e+07	0.0430797	0.712206	0.148386	0.0114634	-0.489634	6.44682
P08195	1	1	38.72	0.013716	2.20578	Condition 1	Condition 2	4F2 cell-surface antigen heavy chain OS=Homo sapiens GN=SLC3A2 PE=1 SV=3	1.56617e+06	1.61784e+06	1.13688e+06	1.4403e+06	0.183318	767004	721907	469986	652966	0.24513	0.453354	0.537476	0.0115405	-1.14129	6.43715
Q99733	3	2	157.36	0.00847007	1.45368	Condition 1	Condition 2	Nucleosome assembly protein 1-like 4 OS=Homo sapiens GN=NAP1L4 PE=1 SV=1	1.23261e+07	1.31414e+07	1.52184e+07	1.3562e+07	0.109963	8.88045e+06	8.91552e+06	1.01923e+07	9.32941e+06	0.0801186	0.687909	0.401548	0.0117393	-0.539711	6.41251
Q96AE4	1	1	34.18	0.00692932	1.85532	Condition 1	Condition 2	Far upstream element-binding protein 1 OS=Homo sapiens GN=FUBP1 PE=1 SV=3	1.64599e+07	1.15934e+07	1.51768e+07	1.441e+07	0.17503	8.17331e+06	6.93642e+06	8.19086e+06	7.76687e+06	0.0926033	0.538991	0.150406	0.0118091	-0.891668	6.40396
O43390	2	1	104.49	0.0215228	1.57076	Condition 1	Condition 2	Heterogeneous nuclear ribonucleoprotein R OS=Homo sapiens GN=HNRNPR PE=1 SV=1	1.78905e+07	1.9573e+07	1.90705e+07	1.88447e+07	0.0458304	9.51077e+06	1.18439e+07	1.46367e+07	1.19971e+07	0.213919	0.636633	0.203455	0.0118751	-0.651467	6.39592
O75947	3	3	270.6	0.00627087	1.75117	Condition 1	Condition 2	ATP synthase subunit d, mitochondrial OS=Homo sapiens GN=ATP5H PE=1 SV=3	8.2513e+07	8.88047e+07	1.11245e+08	9.41877e+07	0.160357	5.02951e+07	5.98806e+07	5.11816e+07	5.37857e+07	0.0984805	0.571048	0.21904	0.0119482	-0.808315	6.38706
Q03154	2	2	86.97	0.00817854	1.62329	Condition 1	Condition 2	Aminoacylase-1 OS=Homo sapiens GN=ACY1 PE=1 SV=1	4.73578e+07	4.95219e+07	6.06374e+07	5.25057e+07	0.135698	3.10935e+07	2.95119e+07	3.64304e+07	3.23453e+07	0.112076	0.616033	0.411279	0.0119861	-0.69892	6.3825
O00571	1	1	33.48	0.0144385	5.77865	Condition 1	Condition 2	ATP-dependent RNA helicase DDX3X OS=Homo sapiens GN=DDX3X PE=1 SV=3	2.34159e+06	1.61856e+06	1.27224e+06	1.74413e+06	0.312835	458494	331610	115366	301823	0.574815	0.173051	0.183642	0.0120315	-2.53073	6.37704
Q14166	1	1	20.26	0.0111649	1.28418	Condition 1	Condition 2	Tubulin--tyrosine ligase-like protein 12 OS=Homo sapiens GN=TTLL12 PE=1 SV=2	1.32721e+07	1.16104e+07	1.20767e+07	1.23198e+07	0.0695713	1.03418e+07	9.37934e+06	9.05947e+06	9.59352e+06	0.0695714	0.77871	0.754974	0.0121879	-0.360842	6.35841
Q9NRV9	2	2	113.42	0.011603	1.66884	Condition 1	Condition 2	Heme-binding protein 1 OS=Homo sapiens GN=HEBP1 PE=1 SV=1	1.38178e+07	1.50862e+07	1.79054e+07	1.56031e+07	0.13409	1.00124e+07	7.78228e+06	1.02544e+07	9.34972e+06	0.145761	0.59922	0.595789	0.0122741	-0.738841	6.34824
P62805	3	2	144.46	0.0100346	1.31463	Condition 1	Condition 2	Histone H4 OS=Homo sapiens GN=HIST1H4A PE=1 SV=2	2.60273e+07	2.19009e+07	2.39845e+07	2.39709e+07	0.086071	1.83065e+07	1.71981e+07	1.91973e+07	1.8234e+07	0.0549296	0.760671	0.381438	0.0123244	-0.394655	6.34233
P48163	2	2	81.35	0.0111945	1.34347	Condition 1	Condition 2	NADP-dependent malic enzyme OS=Homo sapiens GN=ME1 PE=1 SV=1	2.98583e+07	2.74679e+07	3.2638e+07	2.99881e+07	0.0862848	2.04633e+07	2.28798e+07	2.36211e+07	2.23214e+07	0.0739774	0.744343	0.578802	0.0123876	-0.425961	6.33495
P01593	2	1	250.5	0.017109	1.26026	Condition 2	Condition 1	Ig kappa chain V-I region AG OS=Homo sapiens PE=1 SV=1	4.67229e+08	5.23825e+08	5.70931e+08	5.20662e+08	0.0997261	6.74358e+08	6.46197e+08	6.47956e+08	6.5617e+08	0.0240414	1.26026	0.169009	0.012398	0.333724	6.33375
Q8N5S9	1	1	22.86	0.0169393	1.39477	Condition 1	Condition 2	Calcium/calmodulin-dependent protein kinase kinase 1 OS=Homo sapiens GN=CAMKK1 PE=1 SV=2	2.19673e+08	2.18408e+08	2.3488e+08	2.24321e+08	0.0408653	1.43633e+08	1.50829e+08	1.88026e+08	1.60829e+08	0.148145	0.716962	0.257882	0.0125688	-0.480031	6.31401
Q86UP2	2	2	119.88	0.0132803	1.25033	Condition 1	Condition 2	Kinectin OS=Homo sapiens GN=KTN1 PE=1 SV=1	1.21807e+07	1.08681e+07	1.2015e+07	1.16879e+07	0.0611591	8.64049e+06	9.71461e+06	9.68852e+06	9.34787e+06	0.0655495	0.799791	0.84713	0.0125972	-0.322305	6.31075
Q9UNH7	2	2	79.99	0.0116704	1.46454	Condition 1	Condition 2	Sorting nexin-6 OS=Homo sapiens GN=SNX6 PE=1 SV=1	1.72809e+07	1.50196e+07	1.43327e+07	1.55444e+07	0.0992375	1.20649e+07	9.84583e+06	9.93085e+06	1.06138e+07	0.118462	0.682809	0.798338	0.0127338	-0.550445	6.2952
A4D1P6	1	1	13.42	0.000172875	2.88482	Condition 1	Condition 2	WD repeat-containing protein 91 OS=Homo sapiens GN=WDR91 PE=1 SV=2	1.80517e+07	1.4544e+07	1.43166e+07	1.56375e+07	0.133902	5.46269e+06	5.1981e+06	5.60104e+06	5.42061e+06	0.0377707	0.346642	0.0189408	0.0130738	-1.52848	6.25718
P41247	1	1	13.72	0.0118065	1.46996	Condition 2	Condition 1	Patatin-like phospholipase domain-containing protein 4 OS=Homo sapiens GN=PNPLA4 PE=1 SV=3	8.55118e+06	9.45546e+06	1.05177e+07	9.50813e+06	0.103526	1.53867e+07	1.23512e+07	1.41917e+07	1.39765e+07	0.109409	1.46996	0.585939	0.0130976	0.555774	6.25455
O95394	1	1	36.1	0.0059277	2.14744	Condition 1	Condition 2	Phosphoacetylglucosamine mutase OS=Homo sapiens GN=PGM3 PE=1 SV=1	1.04739e+07	9.35791e+06	6.75672e+06	8.86286e+06	0.215215	4.41535e+06	3.74065e+06	4.2255e+06	4.12717e+06	0.084303	0.46567	0.0644042	0.0133648	-1.10262	6.22542
O75436	2	2	134.46	0.0129544	1.10072	Condition 1	Condition 2	Vacuolar protein sorting-associated protein 26A OS=Homo sapiens GN=VPS26A PE=1 SV=2	5.36822e+07	5.41666e+07	5.66703e+07	5.48397e+07	0.0292437	5.13084e+07	4.89044e+07	4.92527e+07	4.98218e+07	0.0260759	0.908499	0.792445	0.0135745	-0.138443	6.20296
P11766	7	7	531.43	0.0110942	1.23228	Condition 1	Condition 2	Alcohol dehydrogenase class-3 OS=Homo sapiens GN=ADH5 PE=1 SV=4	4.27451e+08	4.45068e+08	4.89197e+08	4.53905e+08	0.0700758	3.83287e+08	3.53004e+08	3.68745e+08	3.68345e+08	0.041118	0.811503	0.369649	0.0136241	-0.301332	6.19769
P35611	1	1	95.82	0.0231772	1.40516	Condition 1	Condition 2	Alpha-adducin OS=Homo sapiens GN=ADD1 PE=1 SV=2	1.82195e+07	1.78528e+07	1.88747e+07	1.83157e+07	0.0282654	1.4985e+07	1.07893e+07	1.33293e+07	1.30346e+07	0.162134	0.711662	0.113223	0.0136522	-0.490736	6.19473
P08865	4	3	196.8	0.0129158	1.3351	Condition 1	Condition 2	40S ribosomal protein SA OS=Homo sapiens GN=RPSA PE=1 SV=4	4.86652e+07	5.36109e+07	5.74414e+07	5.32392e+07	0.0826437	3.73354e+07	4.3665e+07	3.86293e+07	3.98766e+07	0.0838607	0.749008	0.732299	0.0138291	-0.416946	6.17615
P00450	19	19	1382.41	0.013133	1.23781	Condition 2	Condition 1	Ceruloplasmin OS=Homo sapiens GN=CP PE=1 SV=1	1.11573e+09	1.02655e+09	1.15583e+09	1.09937e+09	0.0601917	1.4594e+09	1.30417e+09	1.31887e+09	1.36081e+09	0.0629737	1.23781	0.747081	0.013891	0.307793	6.1697
Q13434	1	1	16.85	0.0103199	2.28129	Condition 2	Condition 1	Putative E3 ubiquitin-protein ligase makorin-4 OS=Homo sapiens GN=MKRN4P PE=5 SV=1	2.75542e+08	2.08914e+08	1.78246e+08	2.209e+08	0.225185	5.23515e+08	3.88302e+08	5.99996e+08	5.03937e+08	0.212717	2.28129	0.354363	0.0142793	1.18985	6.12993
Q09666	168	166	11106.5	0.0120142	1.22671	Condition 1	Condition 2	Neuroblast differentiation-associated protein AHNAK OS=Homo sapiens GN=AHNAK PE=1 SV=2	1.4318e+10	1.55368e+10	1.65052e+10	1.54534e+10	0.0709222	1.31331e+10	1.24368e+10	1.22222e+10	1.25974e+10	0.0378	0.815187	0.317589	0.0143807	-0.294798	6.11972
P61204	2	2	210.95	0.0119075	1.24383	Condition 1	Condition 2	ADP-ribosylation factor 3 OS=Homo sapiens GN=ARF3 PE=1 SV=2	1.29464e+08	1.29343e+08	1.46581e+08	1.35129e+08	0.0733962	1.14151e+08	1.07769e+08	1.03999e+08	1.0864e+08	0.0472341	0.80397	0.422336	0.014748	-0.314787	6.08334
O60240	25	25	2535.79	0.0161497	1.10035	Condition 2	Condition 1	Perilipin-1 OS=Homo sapiens GN=PLIN1 PE=1 SV=2	8.00184e+09	8.15591e+09	8.63768e+09	8.26515e+09	0.0401321	9.20774e+09	9.09026e+09	8.98564e+09	9.09455e+09	0.0122175	1.10035	0.201782	0.0147723	0.137962	6.08096
P39656	5	5	128.67	0.0144352	1.24343	Condition 1	Condition 2	Dolichyl-diphosphooligosaccharide--protein glycosyltransferase 48 kDa subunit OS=Homo sapiens GN=DDOST PE=1 SV=4	5.94141e+07	6.36422e+07	6.72491e+07	6.34351e+07	0.0618205	5.49796e+07	4.84858e+07	4.95831e+07	5.10162e+07	0.0681349	0.804226	0.87996	0.0147956	-0.314328	6.07869
Q15404	6	6	368.91	0.0178939	1.21459	Condition 1	Condition 2	Ras suppressor protein 1 OS=Homo sapiens GN=RSU1 PE=1 SV=3	3.81443e+08	3.85301e+08	4.05453e+08	3.90732e+08	0.0329981	3.19873e+08	2.96445e+08	3.48783e+08	3.217e+08	0.0814946	0.823326	0.389522	0.0149437	-0.280465	6.06432
P13716	5	5	374.04	0.0220625	1.31582	Condition 2	Condition 1	Delta-aminolevulinic acid dehydratase OS=Homo sapiens GN=ALAD PE=1 SV=1	1.60765e+08	1.94037e+08	2.047e+08	1.86501e+08	0.122878	2.56835e+08	2.39367e+08	2.40004e+08	2.45402e+08	0.040369	1.31582	0.314897	0.0150206	0.395967	6.05691
P08133	30	30	2755.3	0.0126368	1.17747	Condition 1	Condition 2	Annexin A6 OS=Homo sapiens GN=ANXA6 PE=1 SV=3	3.9691e+09	4.26691e+09	4.48338e+09	4.2398e+09	0.0609015	3.68483e+09	3.59634e+09	3.5211e+09	3.60076e+09	0.0227601	0.849276	0.183036	0.0150273	-0.235694	6.05627
O75351	4	4	76.46	0.0123759	1.29737	Condition 1	Condition 2	Vacuolar protein sorting-associated protein 4B OS=Homo sapiens GN=VPS4B PE=1 SV=2	1.58498e+07	1.69102e+07	1.87285e+07	1.71628e+07	0.0848282	1.27152e+07	1.28012e+07	1.41703e+07	1.32289e+07	0.061715	0.770787	0.478467	0.0150723	-0.375595	6.05195
Q15293	3	3	148.89	0.0142387	1.10686	Condition 1	Condition 2	Reticulocalbin-1 OS=Homo sapiens GN=RCN1 PE=1 SV=1	3.58197e+07	3.56588e+07	3.34597e+07	3.49794e+07	0.037695	3.21002e+07	3.09798e+07	3.17272e+07	3.16024e+07	0.0180537	0.903458	0.31541	0.0152076	-0.146471	6.03907
P62750	1	1	29.23	0.0112093	1.24591	Condition 1	Condition 2	60S ribosomal protein L23a OS=Homo sapiens GN=RPL23A PE=1 SV=1	5.10929e+07	4.72652e+07	5.57467e+07	5.13682e+07	0.082687	4.15144e+07	4.03613e+07	4.18132e+07	4.12297e+07	0.0185962	0.802629	0.0631115	0.0152407	-0.317194	6.03593
P35268	2	2	81.97	0.0161444	1.33744	Condition 1	Condition 2	60S ribosomal protein L22 OS=Homo sapiens GN=RPL22 PE=1 SV=2	6.01696e+07	5.21176e+07	6.09769e+07	5.77547e+07	0.084816	4.49621e+07	3.87842e+07	4.58024e+07	4.31829e+07	0.0887494	0.747695	0.759384	0.0153739	-0.419479	6.02337
O14773	2	2	169.81	0.0109887	1.37665	Condition 1	Condition 2	Tripeptidyl-peptidase 1 OS=Homo sapiens GN=TPP1 PE=1 SV=2	2.65391e+07	2.1551e+07	2.28239e+07	2.3638e+07	0.109645	1.61032e+07	1.73224e+07	1.80862e+07	1.71706e+07	0.058249	0.726398	0.259234	0.0157044	-0.461167	5.99269
P20036	1	1	23.16	0.0353582	1.82567	Condition 2	Condition 1	HLA class II histocompatibility antigen, DP alpha 1 chain OS=Homo sapiens GN=HLA-DPA1 PE=1 SV=1	2.37741e+06	4.03432e+06	4.40108e+06	3.60427e+06	0.299146	5.78251e+06	7.04357e+06	6.9145e+06	6.5802e+06	0.105441	1.82567	0.585664	0.0158624	0.868423	5.97825
Q9UBC2	1	1	75.36	0.0244178	1.65584	Condition 1	Condition 2	Epidermal growth factor receptor substrate 15-like 1 OS=Homo sapiens GN=EPS15L1 PE=1 SV=1	6.76345e+06	6.27211e+06	5.99445e+06	6.34334e+06	0.0613899	4.99995e+06	3.32965e+06	3.16305e+06	3.83089e+06	0.265177	0.603923	0.256239	0.0161312	-0.727564	5.954
Q6UWY5	2	2	191.04	0.0143115	1.31918	Condition 1	Condition 2	Olfactomedin-like protein 1 OS=Homo sapiens GN=OLFML1 PE=1 SV=2	2.10616e+07	2.24794e+07	2.51278e+07	2.28896e+07	0.0901667	1.85017e+07	1.60123e+07	1.75403e+07	1.73514e+07	0.0723517	0.758047	0.540142	0.0165267	-0.399641	5.91906
P52758	1	1	99.55	0.000483498	1.8731	Condition 1	Condition 2	Ribonuclease UK114 OS=Homo sapiens GN=HRSP12 PE=1 SV=1	4.41566e+07	4.42033e+07	5.28748e+07	4.70782e+07	0.106633	2.51917e+07	2.52715e+07	2.49384e+07	2.51339e+07	0.00691894	0.533874	0.00239711	0.0169068	-0.905428	5.88625
P49773	2	2	82.11	0.0148303	1.46472	Condition 1	Condition 2	Histidine triad nucleotide-binding protein 1 OS=Homo sapiens GN=HINT1 PE=1 SV=2	4.72848e+07	4.80902e+07	5.80935e+07	5.11561e+07	0.117707	3.05443e+07	3.76839e+07	3.65483e+07	3.49255e+07	0.109847	0.682724	0.577467	0.0169964	-0.550626	5.87863
Q16363	10	10	669.92	0.0202883	1.1258	Condition 2	Condition 1	Laminin subunit alpha-4 OS=Homo sapiens GN=LAMA4 PE=1 SV=4	2.04575e+08	1.90857e+08	2.12177e+08	2.02536e+08	0.0533515	2.30137e+08	2.24536e+08	2.2937e+08	2.28014e+08	0.0133183	1.1258	0.1464	0.0170798	0.170944	5.87157
Q4KMQ2	1	1	18.7	0.0161519	1.30923	Condition 1	Condition 2	Anoctamin-6 OS=Homo sapiens GN=ANO6 PE=1 SV=2	1.8455e+06	1.5962e+06	1.88333e+06	1.77501e+06	0.0878879	1.26984e+06	1.4666e+06	1.33087e+06	1.35577e+06	0.074287	0.763809	0.588377	0.0173855	-0.388716	5.84597
Q6UW68	2	2	80.03	0.0228512	1.34906	Condition 1	Condition 2	Transmembrane protein 205 OS=Homo sapiens GN=TMEM205 PE=1 SV=1	2.05222e+07	2.34132e+07	2.30761e+07	2.23372e+07	0.070771	1.75662e+07	1.42332e+07	1.78733e+07	1.65576e+07	0.121926	0.741256	0.760203	0.0174801	-0.431956	5.83814
P69905	8	8	1164.37	0.019538	1.06734	Condition 1	Condition 2	Hemoglobin subunit alpha OS=Homo sapiens GN=HBA1 PE=1 SV=2	6.09276e+10	6.12124e+10	6.04023e+10	6.08474e+10	0.00675403	5.5099e+10	5.80023e+10	5.79236e+10	5.70083e+10	0.0290127	0.936906	0.116297	0.0175161	-0.0940237	5.83517
Q969Z3	2	1	56.09	0.0207283	2.59411	Condition 1	Condition 2	MOSC domain-containing protein 2, mitochondrial OS=Homo sapiens GN=MARC2 PE=1 SV=1	2.965e+06	1.92323e+06	2.18465e+06	2.35763e+06	0.22989	1.25409e+06	911501	560925	908838	0.381355	0.385489	0.580476	0.0175332	-1.37524	5.83377
Q9BX68	2	2	89.83	0.000484573	2.34966	Condition 1	Condition 2	Histidine triad nucleotide-binding protein 2, mitochondrial OS=Homo sapiens GN=HINT2 PE=1 SV=1	3.15322e+07	2.82336e+07	2.3955e+07	2.79069e+07	0.136137	1.20525e+07	1.21019e+07	1.14765e+07	1.1877e+07	0.0292732	0.425593	0.0166106	0.0175465	-1.23245	5.83268
Q9NVJ2	2	2	112.14	0.0126176	1.30903	Condition 1	Condition 2	ADP-ribosylation factor-like protein 8B OS=Homo sapiens GN=ARL8B PE=1 SV=1	2.56237e+07	2.16914e+07	2.17901e+07	2.30351e+07	0.0973445	1.72569e+07	1.69171e+07	1.8617e+07	1.7597e+07	0.0511172	0.763922	0.277228	0.017563	-0.388502	5.83132
P21796	4	4	207.37	0.0129471	1.32878	Condition 1	Condition 2	Voltage-dependent anion-selective channel protein 1 OS=Homo sapiens GN=VDAC1 PE=1 SV=2	7.54446e+07	7.48737e+07	8.89344e+07	7.97509e+07	0.0997892	6.4277e+07	5.7835e+07	5.79429e+07	6.00183e+07	0.0614569	0.752572	0.353663	0.0175941	-0.410099	5.82877
Q96CV9	1	1	82.52	0.0514198	2.78109	Condition 1	Condition 2	Optineurin OS=Homo sapiens GN=OPTN PE=1 SV=2	1.02418e+06	816806	709633	850205	0.188083	486752	308810	121567	305709	0.597339	0.359572	0.868014	0.0177604	-1.47565	5.81519
O00159	13	13	580.5	0.0338128	1.43794	Condition 2	Condition 1	Unconventional myosin-Ic OS=Homo sapiens GN=MYO1C PE=1 SV=4	1.76999e+08	2.44194e+08	2.57886e+08	2.2636e+08	0.191253	3.34351e+08	3.26542e+08	3.1558e+08	3.25491e+08	0.0289695	1.43794	0.0905833	0.0179132	0.524002	5.80284
P22695	10	10	691.18	0.0130225	1.33723	Condition 1	Condition 2	Cytochrome b-c1 complex subunit 2, mitochondrial OS=Homo sapiens GN=UQCRC2 PE=1 SV=3	3.6598e+08	4.14305e+08	4.55654e+08	4.1198e+08	0.108942	3.1574e+08	2.94355e+08	3.14158e+08	3.08084e+08	0.0386796	0.747815	0.131705	0.0179144	-0.419248	5.80274
P26641	7	7	304.43	0.0133915	1.37192	Condition 1	Condition 2	Elongation factor 1-gamma OS=Homo sapiens GN=EEF1G PE=1 SV=3	1.53319e+08	1.77333e+08	1.93594e+08	1.74749e+08	0.115945	1.23688e+08	1.23593e+08	1.34845e+08	1.27375e+08	0.050787	0.728904	0.185018	0.0181795	-0.4562	5.78154
P17655	10	10	631.56	0.0157343	1.18119	Condition 1	Condition 2	Calpain-2 catalytic subunit OS=Homo sapiens GN=CAPN2 PE=1 SV=6	2.21405e+08	2.20133e+08	2.45151e+08	2.28896e+08	0.0615618	2.01575e+08	1.87101e+08	1.92676e+08	1.93784e+08	0.0376731	0.846602	0.423222	0.0185846	-0.240243	5.74975
Q8WTS1	3	3	178.53	0.013735	1.36999	Condition 1	Condition 2	1-acylglycerol-3-phosphate O-acyltransferase ABHD5 OS=Homo sapiens GN=ABHD5 PE=1 SV=1	2.22266e+07	2.6515e+07	2.81392e+07	2.56269e+07	0.119198	1.94182e+07	1.86593e+07	1.80403e+07	1.87059e+07	0.0368945	0.729933	0.0971325	0.0186525	-0.454164	5.74448
Q687X5	1	1	16.84	0.0203091	1.27516	Condition 1	Condition 2	Metalloreductase STEAP4 OS=Homo sapiens GN=STEAP4 PE=1 SV=1	1.32231e+07	1.26639e+07	1.42535e+07	1.33802e+07	0.0602647	9.63873e+06	1.02002e+07	1.16399e+07	1.0493e+07	0.0983707	0.784215	0.757974	0.0188114	-0.350678	5.73225
Q9Y5Z4	2	2	119.86	0.0224426	1.2565	Condition 1	Condition 2	Heme-binding protein 2 OS=Homo sapiens GN=HEBP2 PE=1 SV=1	1.78443e+08	1.60629e+08	1.7775e+08	1.72274e+08	0.0585738	1.45764e+08	1.22945e+08	1.42611e+08	1.37107e+08	0.0901862	0.795864	0.799492	0.0188341	-0.329407	5.73051
P55036	2	2	79.32	0.0178855	1.21962	Condition 1	Condition 2	26S proteasome non-ATPase regulatory subunit 4 OS=Homo sapiens GN=PSMD4 PE=1 SV=1	1.0732e+07	1.11042e+07	1.21699e+07	1.13354e+07	0.065834	9.52139e+06	8.66679e+06	9.69447e+06	9.29422e+06	0.0591998	0.81993	0.704343	0.0188893	-0.286427	5.72629
Q9P2E9	3	3	229.04	0.0203077	1.39648	Condition 1	Condition 2	Ribosome-binding protein 1 OS=Homo sapiens GN=RRBP1 PE=1 SV=4	1.0753e+07	1.23636e+07	1.28005e+07	1.19724e+07	0.0900694	7.68251e+06	8.22616e+06	9.81099e+06	8.57322e+06	0.128991	0.716085	0.974801	0.018913	-0.481798	5.72448
P07951	8	1	537.83	0.101342	2.71018	Condition 1	Condition 2	Tropomyosin beta chain OS=Homo sapiens GN=TPM2 PE=1 SV=1	5.3709e+07	6.25862e+07	4.61157e+07	5.41369e+07	0.152273	2.61396e+07	2.89956e+07	4.791e+06	1.99754e+07	0.662183	0.368979	0.559499	0.0191637	-1.43839	5.70548
Q96CX6	1	1	24.61	0.0106009	1.64028	Condition 2	Condition 1	Leucine-rich repeat-containing protein 58 OS=Homo sapiens GN=LRRC58 PE=1 SV=2	4.95304e+07	4.73483e+07	5.64734e+07	5.11174e+07	0.0932174	7.57162e+07	7.55346e+07	1.0029e+08	8.38468e+07	0.169835	1.64028	0.20139	0.0195169	0.713941	5.67913
Q9BR76	2	2	49.61	0.0245054	1.29521	Condition 1	Condition 2	Coronin-1B OS=Homo sapiens GN=CORO1B PE=1 SV=1	3.03742e+07	2.74007e+07	3.02229e+07	2.93326e+07	0.0570957	2.50586e+07	2.29402e+07	1.99423e+07	2.2647e+07	0.11351	0.772077	0.595937	0.0195326	-0.373183	5.67797
P28161	5	4	187.79	0.0161149	1.22903	Condition 1	Condition 2	Glutathione S-transferase Mu 2 OS=Homo sapiens GN=GSTM2 PE=1 SV=2	9.34838e+07	9.61307e+07	1.07726e+08	9.91136e+07	0.0764309	8.43764e+07	8.07869e+07	7.67681e+07	8.06438e+07	0.0471976	0.81365	0.403132	0.0195458	-0.297519	5.677
P02730	12	12	1138.78	0.00704097	1.74508	Condition 2	Condition 1	Band 3 anion transport protein OS=Homo sapiens GN=SLC4A1 PE=1 SV=3	7.32183e+08	9.42895e+08	1.07077e+09	9.15283e+08	0.1868	1.58266e+09	1.59856e+09	1.61052e+09	1.59725e+09	0.00875179	1.74508	0.0132803	0.0197459	0.803296	5.6623
P27169	4	4	282.67	0.0177434	1.20084	Condition 2	Condition 1	Serum paraoxonase/arylesterase 1 OS=Homo sapiens GN=PON1 PE=1 SV=3	1.35892e+08	1.38925e+08	1.47124e+08	1.40647e+08	0.0413164	1.78691e+08	1.56014e+08	1.71977e+08	1.68894e+08	0.0689697	1.20084	0.398545	0.0198026	0.264038	5.65817
Q16555	15	11	1015.37	0.01455	1.26716	Condition 1	Condition 2	Dihydropyrimidinase-related protein 2 OS=Homo sapiens GN=DPYSL2 PE=1 SV=1	6.73713e+08	7.03311e+08	8.02443e+08	7.26489e+08	0.0928056	5.80217e+08	5.49567e+08	5.90184e+08	5.73323e+08	0.0369219	0.789169	0.179458	0.0198763	-0.341593	5.65281
Q12797	10	10	843.17	0.00752743	1.70108	Condition 2	Condition 1	Aspartyl/asparaginyl beta-hydroxylase OS=Homo sapiens GN=ASPH PE=1 SV=3	5.88155e+08	7.34514e+08	8.5377e+08	7.2548e+08	0.183379	1.22812e+09	1.21654e+09	1.25762e+09	1.2341e+09	0.0171607	1.70108	0.0494291	0.0199146	0.766447	5.65003
Q01844	1	1	25.13	0.0181522	1.5756	Condition 1	Condition 2	RNA-binding protein EWS OS=Homo sapiens GN=EWSR1 PE=1 SV=1	1.69754e+07	2.24769e+07	2.00419e+07	1.98314e+07	0.139011	1.18864e+07	1.47541e+07	1.11193e+07	1.25866e+07	0.152218	0.63468	0.65138	0.0201597	-0.655899	5.63238
Q92973	2	2	79.54	0.0186601	1.24598	Condition 1	Condition 2	Transportin-1 OS=Homo sapiens GN=TNPO1 PE=1 SV=2	2.9905e+07	2.80652e+07	2.56268e+07	2.78657e+07	0.0770136	2.37271e+07	2.09705e+07	2.23959e+07	2.23645e+07	0.0616413	0.802582	0.584226	0.0201978	-0.31728	5.62965
Q9UDR5	1	1	21.84	0.013575	1.67654	Condition 1	Condition 2	Alpha-aminoadipic semialdehyde synthase, mitochondrial OS=Homo sapiens GN=AASS PE=1 SV=1	3.98971e+06	5.19162e+06	5.72509e+06	4.96881e+06	0.178893	2.682e+06	3.23563e+06	2.97352e+06	2.96372e+06	0.0934453	0.596465	0.176968	0.0202934	-0.745491	5.62285
P20700	1	1	106.56	0.00946445	1.63337	Condition 2	Condition 1	Lamin-B1 OS=Homo sapiens GN=LMNB1 PE=1 SV=2	3.40501e+06	3.58525e+06	3.24758e+06	3.41261e+06	0.0495122	5.10003e+06	4.9058e+06	6.71633e+06	5.57405e+06	0.178325	1.63337	0.0561682	0.0205984	0.70785	5.60132
P30048	5	5	421.13	0.0132237	1.44428	Condition 1	Condition 2	Thioredoxin-dependent peroxide reductase, mitochondrial OS=Homo sapiens GN=PRDX3 PE=1 SV=3	4.01166e+08	4.50855e+08	5.27804e+08	4.59942e+08	0.138727	3.33117e+08	3.22405e+08	2.9985e+08	3.18458e+08	0.0533232	0.692387	0.132286	0.0206279	-0.53035	5.59926
Q8IXB3	1	1	27.28	0.0221522	1.27796	Condition 1	Condition 2	Tumor suppressor candidate 5 OS=Homo sapiens GN=TUSC5 PE=2 SV=2	4.76167e+07	4.91447e+07	5.35231e+07	5.00948e+07	0.0611968	3.74589e+07	3.62858e+07	4.38525e+07	3.91991e+07	0.103892	0.782497	0.723407	0.0207933	-0.353842	5.58774
Q8IWZ3	1	1	13.52	0.027211	1.95098	Condition 1	Condition 2	Ankyrin repeat and KH domain-containing protein 1 OS=Homo sapiens GN=ANKHD1 PE=1 SV=1	411264	561346	430492	467701	0.174613	251954	301647	165579	239726	0.287215	0.512564	0.830966	0.020898	-0.964196	5.58049
Q9Y4G6	32	30	2376.66	0.0248173	1.18401	Condition 2	Condition 1	Talin-2 OS=Homo sapiens GN=TLN2 PE=1 SV=4	3.61376e+08	3.82009e+08	4.25115e+08	3.895e+08	0.0835003	4.63726e+08	4.68032e+08	4.51758e+08	4.61172e+08	0.0182841	1.18401	0.125967	0.0209308	0.243682	5.57823
P00491	1	1	90.85	0.029873	1.41297	Condition 2	Condition 1	Purine nucleoside phosphorylase OS=Homo sapiens GN=PNP PE=1 SV=2	5.72444e+07	3.99002e+07	4.62314e+07	4.7792e+07	0.183645	7.05951e+07	6.73627e+07	6.46286e+07	6.75288e+07	0.044229	1.41297	0.20757	0.0210684	0.498735	5.56877
P00739	14	3	664.43	0.0265029	1.24289	Condition 2	Condition 1	Haptoglobin-related protein OS=Homo sapiens GN=HPR PE=1 SV=2	2.43491e+07	2.05592e+07	2.44486e+07	2.3119e+07	0.095913	2.92019e+07	2.98713e+07	2.71301e+07	2.87344e+07	0.0497368	1.24289	0.586973	0.0210764	0.313702	5.56823
P20160	1	1	25.02	0.000394839	3.53013	Condition 2	Condition 1	Azurocidin OS=Homo sapiens GN=AZU1 PE=1 SV=3	6.40545e+06	5.74881e+06	6.66196e+06	6.27208e+06	0.075088	2.07096e+07	1.88699e+07	2.68442e+07	2.21412e+07	0.188585	3.53013	0.0251238	0.0211868	1.81972	5.56069
P35232	7	7	431.99	0.0226965	1.22154	Condition 1	Condition 2	Prohibitin OS=Homo sapiens GN=PHB PE=1 SV=1	1.6804e+08	1.54145e+08	1.54372e+08	1.58852e+08	0.0500937	1.42731e+08	1.22335e+08	1.25062e+08	1.30043e+08	0.0851468	0.818639	0.681146	0.021589	-0.288701	5.53356
P63173	1	1	37.92	0.0193836	1.55335	Condition 1	Condition 2	60S ribosomal protein L38 OS=Homo sapiens GN=RPL38 PE=1 SV=2	1.79997e+07	1.35098e+07	1.63413e+07	1.59503e+07	0.142342	1.18248e+07	1.00012e+07	8.97895e+06	1.02683e+07	0.140394	0.643772	0.574665	0.0215932	-0.635379	5.53328
Q96RQ3	1	1	41.4	0.00142301	1.7963	Condition 1	Condition 2	Methylcrotonoyl-CoA carboxylase subunit alpha, mitochondrial OS=Homo sapiens GN=MCCC1 PE=1 SV=3	1.15182e+07	9.59146e+06	1.21477e+07	1.10858e+07	0.120141	6.22886e+06	5.94762e+06	6.33791e+06	6.17146e+06	0.0326302	0.5567	0.0447003	0.0216007	-0.845027	5.53278
P27797	11	10	754.33	0.0263934	1.17308	Condition 1	Condition 2	Calreticulin OS=Homo sapiens GN=CALR PE=1 SV=1	1.37702e+09	1.38066e+09	1.44113e+09	1.3996e+09	0.0257308	1.27443e+09	1.21008e+09	1.09478e+09	1.1931e+09	0.0762895	0.852455	0.270709	0.021695	-0.230304	5.5265
P43034	3	3	152.47	0.0252571	1.18484	Condition 1	Condition 2	Platelet-activating factor acetylhydrolase IB subunit alpha OS=Homo sapiens GN=PAFAH1B1 PE=1 SV=2	4.9205e+07	4.68445e+07	4.98929e+07	4.86475e+07	0.0328667	4.08446e+07	3.79443e+07	4.43858e+07	4.10582e+07	0.0785736	0.843995	0.394385	0.0217563	-0.244693	5.52242
Q15365	3	2	144.17	0.0163711	1.3394	Condition 1	Condition 2	Poly(rC)-binding protein 1 OS=Homo sapiens GN=PCBP1 PE=1 SV=2	6.23705e+07	7.05442e+07	7.84664e+07	7.04604e+07	0.114224	5.53287e+07	4.99974e+07	5.24913e+07	5.26058e+07	0.0507064	0.746602	0.197951	0.0218226	-0.42159	5.51803
P13804	7	7	723.92	0.000863476	2.13987	Condition 1	Condition 2	Electron transfer flavoprotein subunit alpha, mitochondrial OS=Homo sapiens GN=ETFA PE=1 SV=1	4.05956e+08	4.43429e+08	5.34744e+08	4.61376e+08	0.143577	2.20358e+08	2.05939e+08	2.20534e+08	2.1561e+08	0.0388489	0.467319	0.0314744	0.0219392	-1.09752	5.51035
O43813	2	2	62.97	0.0215757	1.30785	Condition 1	Condition 2	LanC-like protein 1 OS=Homo sapiens GN=LANCL1 PE=1 SV=1	3.3558e+07	2.97187e+07	2.89263e+07	3.07343e+07	0.0806013	2.62333e+07	2.17041e+07	2.25624e+07	2.34999e+07	0.102373	0.764615	0.970732	0.022186	-0.387195	5.49421
O43181	1	1	23.23	0.0269455	1.85633	Condition 1	Condition 2	NADH dehydrogenase [ubiquinone] iron-sulfur protein 4, mitochondrial OS=Homo sapiens GN=NDUFS4 PE=1 SV=1	5.06777e+06	6.17808e+06	6.84828e+06	6.03138e+06	0.1491	2.81552e+06	2.55797e+06	4.37374e+06	3.24908e+06	0.302381	0.538696	0.911762	0.0223922	-0.892457	5.48086
Q86SX6	1	1	15.31	0.0492829	2.18002	Condition 1	Condition 2	Glutaredoxin-related protein 5, mitochondrial OS=Homo sapiens GN=GLRX5 PE=1 SV=2	2.05343e+06	2.34819e+06	2.91191e+06	2.43784e+06	0.178931	1.43018e+06	591120	1.33349e+06	1.11826e+06	0.410522	0.458711	0.948949	0.0225726	-1.12434	5.46928
P07360	2	2	50.76	0.0258794	1.41084	Condition 2	Condition 1	Complement component C8 gamma chain OS=Homo sapiens GN=C8G PE=1 SV=3	2.94598e+07	3.38397e+07	3.94201e+07	3.42398e+07	0.1458	5.23067e+07	4.33475e+07	4.92667e+07	4.8307e+07	0.0943144	1.41084	0.908836	0.022657	0.496556	5.4639
P28482	4	1	272.58	0.0218795	1.21002	Condition 1	Condition 2	Mitogen-activated protein kinase 1 OS=Homo sapiens GN=MAPK1 PE=1 SV=3	1.46507e+07	1.39078e+07	1.58469e+07	1.48018e+07	0.0660958	1.22982e+07	1.14444e+07	1.29555e+07	1.22327e+07	0.061937	0.826433	0.749802	0.0228378	-0.27503	5.45243
Q9NRR5	1	1	35.46	0.0309997	1.62559	Condition 1	Condition 2	Ubiquilin-4 OS=Homo sapiens GN=UBQLN4 PE=1 SV=2	4.74131e+06	3.90287e+06	4.99687e+06	4.54701e+06	0.125861	2.86599e+06	2.14622e+06	3.37924e+06	2.79715e+06	0.221435	0.615162	0.921088	0.0228795	-0.700962	5.4498
Q9HB71	2	2	62.06	0.013483	1.49414	Condition 1	Condition 2	Calcyclin-binding protein OS=Homo sapiens GN=CACYBP PE=1 SV=2	1.57504e+07	1.79343e+07	2.14432e+07	1.8376e+07	0.156291	1.21793e+07	1.29282e+07	1.17886e+07	1.22987e+07	0.0470882	0.669282	0.078144	0.022905	-0.579314	5.4482
P00918	7	7	379.05	0.00181524	1.42768	Condition 2	Condition 1	Carbonic anhydrase 2 OS=Homo sapiens GN=CA2 PE=1 SV=2	5.16435e+08	5.05766e+08	5.21496e+08	5.14566e+08	0.0156052	8.01462e+08	7.19878e+08	6.82568e+08	7.34636e+08	0.0827695	1.42768	0.0342814	0.0229198	0.513674	5.44726
Q9NY33	2	2	75.94	0.0274305	1.31057	Condition 2	Condition 1	Dipeptidyl peptidase 3 OS=Homo sapiens GN=DPP3 PE=1 SV=2	1.52906e+07	1.8695e+07	1.873e+07	1.75719e+07	0.112438	2.4655e+07	2.32384e+07	2.11942e+07	2.30292e+07	0.0755499	1.31057	0.87354	0.0229514	0.390198	5.44527
P48960	1	1	15.38	0.0279836	1.33247	Condition 1	Condition 2	CD97 antigen OS=Homo sapiens GN=CD97 PE=1 SV=4	876643	904667	986775	922695	0.062032	793793	679417	604203	692471	0.137864	0.750487	0.528821	0.0231175	-0.414101	5.43487
P62917	3	3	123.39	0.0187721	1.65081	Condition 1	Condition 2	60S ribosomal protein L8 OS=Homo sapiens GN=RPL8 PE=1 SV=2	3.32361e+07	3.94199e+07	4.61798e+07	3.96119e+07	0.163435	2.20981e+07	2.14091e+07	2.84791e+07	2.39955e+07	0.162457	0.605763	0.532187	0.0231829	-0.723174	5.43079
P80723	2	2	46.13	0.0533919	1.58809	Condition 1	Condition 2	Brain acid soluble protein 1 OS=Homo sapiens GN=BASP1 PE=1 SV=2	8.35267e+07	8.79613e+07	8.7925e+07	8.6471e+07	0.0294885	6.37514e+07	6.28094e+07	3.67885e+07	5.44497e+07	0.281037	0.629688	0.0540336	0.0232685	-0.667291	5.42548
Q86T65	1	1	13.69	0.0264393	1.32545	Condition 1	Condition 2	Disheveled-associated activator of morphogenesis 2 OS=Homo sapiens GN=DAAM2 PE=2 SV=3	9.38921e+07	1.02979e+08	1.07995e+08	1.01622e+08	0.0703462	7.41771e+07	6.83984e+07	8.74351e+07	7.66702e+07	0.127301	0.754463	0.698312	0.0233281	-0.406477	5.42179
P01764	2	1	203.02	0.0301242	1.66692	Condition 2	Condition 1	Ig heavy chain V-III region VH26 OS=Homo sapiens PE=1 SV=1	4.68603e+07	7.13576e+07	6.99995e+07	6.27391e+07	0.219452	1.21662e+08	9.80048e+07	9.40764e+07	1.04581e+08	0.142689	1.66692	0.91966	0.0233885	0.737186	5.41806
P00441	3	3	392.52	0.0194491	1.82912	Condition 1	Condition 2	Superoxide dismutase [Cu-Zn] OS=Homo sapiens GN=SOD1 PE=1 SV=2	4.2504e+08	3.80307e+08	2.8505e+08	3.63466e+08	0.196713	2.35076e+08	1.9791e+08	1.63147e+08	1.98711e+08	0.181023	0.546712	0.403976	0.0234726	-0.871147	5.41288
P11047	17	17	1254.57	0.0226028	1.16949	Condition 2	Condition 1	Laminin subunit gamma-1 OS=Homo sapiens GN=LAMC1 PE=1 SV=3	4.92667e+08	4.9569e+08	5.37807e+08	5.08721e+08	0.0496041	6.233e+08	5.58031e+08	6.0351e+08	5.94947e+08	0.0562515	1.16949	0.724938	0.0235193	0.225886	5.41001
Q96F85	2	2	152.84	0.0282398	1.37044	Condition 1	Condition 2	CB1 cannabinoid receptor-interacting protein 1 OS=Homo sapiens GN=CNRIP1 PE=1 SV=1	6.48432e+07	6.47214e+07	7.43323e+07	6.79656e+07	0.0811295	5.03304e+07	4.22265e+07	5.62248e+07	4.95939e+07	0.141714	0.729691	0.762018	0.023541	-0.454642	5.40868
P07858	3	3	215.47	0.0229489	1.20122	Condition 1	Condition 2	Cathepsin B OS=Homo sapiens GN=CTSB PE=1 SV=3	7.52575e+07	6.61505e+07	7.23268e+07	7.12449e+07	0.0652524	6.30426e+07	5.61182e+07	5.8771e+07	5.93106e+07	0.0589042	0.832489	0.72184	0.0237015	-0.264497	5.39888
Q9Y3U8	1	1	23.67	0.0289092	1.34242	Condition 1	Condition 2	60S ribosomal protein L36 OS=Homo sapiens GN=RPL36 PE=1 SV=3	1.1695e+07	1.145e+07	1.31764e+07	1.21071e+07	0.0771524	9.36488e+06	7.7043e+06	9.98749e+06	9.01889e+06	0.130866	0.744923	0.77026	0.0237187	-0.424837	5.39783
P02652	2	2	85.57	0.0210648	1.48147	Condition 1	Condition 2	Apolipoprotein A-II OS=Homo sapiens GN=APOA2 PE=1 SV=1	4.68422e+06	6.15606e+06	5.95899e+06	5.59976e+06	0.142682	4.04789e+06	3.95631e+06	3.33542e+06	3.77987e+06	0.102549	0.675007	0.381049	0.0238089	-0.567027	5.39235
P06744	13	13	830.44	0.0253277	1.15323	Condition 1	Condition 2	Glucose-6-phosphate isomerase OS=Homo sapiens GN=GPI PE=1 SV=4	1.46452e+09	1.42183e+09	1.54766e+09	1.478e+09	0.0432921	1.30626e+09	1.20093e+09	1.33768e+09	1.28162e+09	0.0558897	0.867131	0.887631	0.023983	-0.205678	5.38184
P09110	3	3	231.72	0.0236315	1.17709	Condition 1	Condition 2	3-ketoacyl-CoA thiolase, peroxisomal OS=Homo sapiens GN=ACAA1 PE=1 SV=2	2.30716e+07	2.45615e+07	2.59578e+07	2.45303e+07	0.0588387	1.95903e+07	2.13617e+07	2.15673e+07	2.08398e+07	0.0521568	0.849553	0.723775	0.0240614	-0.235225	5.37714
P56537	1	1	57.65	0.0215869	1.27034	Condition 1	Condition 2	Eukaryotic translation initiation factor 6 OS=Homo sapiens GN=EIF6 PE=1 SV=1	8.24944e+06	9.68526e+06	9.78728e+06	9.24066e+06	0.0930603	7.77552e+06	7.02745e+06	7.01958e+06	7.27419e+06	0.0596887	0.787193	0.406283	0.0241071	-0.34521	5.3744
P22792	1	1	13.88	0.0229365	1.59205	Condition 2	Condition 1	Carboxypeptidase N subunit 2 OS=Homo sapiens GN=CPN2 PE=1 SV=3	3.08711e+06	3.80483e+06	4.30796e+06	3.7333e+06	0.164348	5.84158e+06	5.10668e+06	6.8825e+06	5.94358e+06	0.150127	1.59205	0.642067	0.0241153	0.670882	5.37391
P30101	11	11	412.55	0.00669265	1.29446	Condition 1	Condition 2	Protein disulfide-isomerase A3 OS=Homo sapiens GN=PDIA3 PE=1 SV=4	7.82444e+08	7.87845e+08	7.72241e+08	7.80843e+08	0.0101483	6.26896e+08	6.38153e+08	5.44604e+08	6.03218e+08	0.0846661	0.772521	0.0470161	0.0242179	-0.372354	5.36778
P05230	1	1	31.87	0.0882172	2.72292	Condition 2	Condition 1	Fibroblast growth factor 1 OS=Homo sapiens GN=FGF1 PE=1 SV=1	15438.2	74302.6	71623.7	53788.2	0.617962	157416	111434	170533	146461	0.211902	2.72292	0.93151	0.0242376	1.44516	5.36661
Q86WU2	1	1	69.16	0.000395079	5.93553	Condition 1	Condition 2	Probable D-lactate dehydrogenase, mitochondrial OS=Homo sapiens GN=LDHD PE=1 SV=1	4.15344e+06	2.81353e+06	2.8379e+06	3.26829e+06	0.234575	600911	603163	447821	550631	0.161712	0.168477	0.0266203	0.0242417	-2.56938	5.36636
P63104	12	9	1152.71	0.0208456	1.2334	Condition 1	Condition 2	14-3-3 protein zeta/delta OS=Homo sapiens GN=YWHAZ PE=1 SV=1	1.51836e+09	1.79083e+09	1.77313e+09	1.69411e+09	0.0899958	1.40004e+09	1.39263e+09	1.32792e+09	1.37353e+09	0.0288849	0.810768	0.126843	0.0243496	-0.302639	5.35996
Q05682	5	5	387.69	0.0299774	1.287	Condition 1	Condition 2	Caldesmon OS=Homo sapiens GN=CALD1 PE=1 SV=3	1.26877e+08	1.31168e+08	1.4046e+08	1.32835e+08	0.0522691	1.164e+08	9.07732e+07	1.02465e+08	1.03213e+08	0.124304	0.776999	0.453058	0.0245143	-0.364015	5.35023
P01620	3	3	228.29	0.00228095	1.35067	Condition 2	Condition 1	Ig kappa chain V-III region SIE OS=Homo sapiens PE=1 SV=1	7.87035e+08	8.05697e+08	8.03006e+08	7.98579e+08	0.0126322	1.16741e+09	1.05761e+09	1.01083e+09	1.07862e+09	0.0745171	1.35067	0.0310163	0.0248731	0.433676	5.32927
P12956	7	7	260.56	0.0185544	1.21605	Condition 1	Condition 2	X-ray repair cross-complementing protein 6 OS=Homo sapiens GN=XRCC6 PE=1 SV=2	1.064e+08	1.11947e+08	1.25706e+08	1.14685e+08	0.0866703	9.25748e+07	9.44207e+07	9.59323e+07	9.43093e+07	0.0178301	0.822336	0.0556465	0.0248789	-0.282201	5.32893
Q01469	8	8	708.89	0.00085552	2.65836	Condition 1	Condition 2	Fatty acid-binding protein, epidermal OS=Homo sapiens GN=FABP5 PE=1 SV=3	1.72629e+09	2.26287e+09	2.45291e+09	2.14736e+09	0.175486	7.85797e+08	8.00988e+08	8.3654e+08	8.07775e+08	0.0322411	0.376171	0.00950752	0.0249161	-1.41054	5.32678
Q9UJZ1	2	2	213.22	0.0227756	1.37836	Condition 1	Condition 2	Stomatin-like protein 2 OS=Homo sapiens GN=STOML2 PE=1 SV=1	1.59466e+07	1.37215e+07	1.30227e+07	1.42303e+07	0.1073	1.16294e+07	1.00406e+07	9.30212e+06	1.0324e+07	0.115194	0.725499	0.755171	0.0249917	-0.462954	5.32241
P02747	3	3	121.63	0.00124113	2.0198	Condition 2	Condition 1	Complement C1q subcomponent subunit C OS=Homo sapiens GN=C1QC PE=1 SV=3	8.97979e+07	8.88727e+07	8.98931e+07	8.95212e+07	0.00629666	1.96871e+08	1.94213e+08	1.51361e+08	1.80815e+08	0.141262	2.0198	0.000973584	0.0250662	1.01421	5.31811
P22307	1	1	13.16	0.0146964	3.26544	Condition 1	Condition 2	Non-specific lipid-transfer protein OS=Homo sapiens GN=SCP2 PE=1 SV=2	2.55874e+06	4.36596e+06	5.1687e+06	4.03113e+06	0.33162	833023	1.26034e+06	1.61009e+06	1.23449e+06	0.315256	0.306238	0.156264	0.0253732	-1.70728	5.30055
P55809	4	4	182.63	0.028934	1.62499	Condition 1	Condition 2	Succinyl-CoA:3-ketoacid coenzyme A transferase 1, mitochondrial OS=Homo sapiens GN=OXCT1 PE=1 SV=1	4.18985e+07	4.78336e+07	5.66582e+07	4.87968e+07	0.152199	3.33562e+07	3.33579e+07	2.33729e+07	3.0029e+07	0.191959	0.615389	0.75188	0.0258727	-0.700429	5.27242
Q53H47	1	1	14.37	0.0444231	1.52093	Condition 2	Condition 1	Histone-lysine N-methyltransferase SETMAR OS=Homo sapiens GN=SETMAR PE=1 SV=1	2.80607e+07	4.09285e+07	4.47998e+07	3.79296e+07	0.231039	6.09701e+07	5.23846e+07	5.97105e+07	5.76884e+07	0.0803667	1.52093	0.437376	0.0260075	0.604955	5.26493
Q86VB7	2	2	177.73	0.0309614	1.26379	Condition 2	Condition 1	Scavenger receptor cysteine-rich type 1 protein M130 OS=Homo sapiens GN=CD163 PE=1 SV=2	2.22446e+07	2.59311e+07	2.75906e+07	2.52554e+07	0.108345	3.41248e+07	3.1025e+07	3.06031e+07	3.19176e+07	0.0602503	1.26379	0.661233	0.0260483	0.337761	5.26266
Q9Y2Q5	1	1	55.36	0.0235086	1.12429	Condition 1	Condition 2	Ragulator complex protein LAMTOR2 OS=Homo sapiens GN=LAMTOR2 PE=1 SV=1	7.13531e+06	7.57881e+06	7.92284e+06	7.54566e+06	0.0523228	6.56449e+06	6.72612e+06	6.84383e+06	6.71148e+06	0.0208965	0.88945	0.224094	0.0260915	-0.169015	5.26028
P07737	7	7	592.07	0.0013471	1.78138	Condition 1	Condition 2	Profilin-1 OS=Homo sapiens GN=PFN1 PE=1 SV=2	8.92614e+08	9.77574e+08	1.14092e+09	1.0037e+09	0.125731	5.63637e+08	5.68805e+08	5.57882e+08	5.63441e+08	0.00969817	0.561363	0.00374281	0.0261255	-0.832993	5.2584
O94887	1	1	13.24	0.0196814	1.27484	Condition 2	Condition 1	FERM, RhoGEF and pleckstrin domain-containing protein 2 OS=Homo sapiens GN=FARP2 PE=1 SV=3	1.74762e+07	1.59488e+07	1.6785e+07	1.67367e+07	0.0456988	2.06767e+07	1.95603e+07	2.37727e+07	2.13366e+07	0.102282	1.27484	0.218782	0.026166	0.350319	5.25616
Q8N109	1	1	18.04	0.0508799	1.70351	Condition 2	Condition 1	Killer cell immunoglobulin-like receptor 2DL5A OS=Homo sapiens GN=KIR2DL5A PE=2 SV=1	5.49094e+07	8.2851e+07	1.1115e+08	8.297e+07	0.338921	1.34387e+08	1.38904e+08	1.5073e+08	1.4134e+08	0.0597121	1.70351	0.165268	0.0262092	0.76851	5.25378
P33176	3	3	81.98	0.0334412	1.2906	Condition 1	Condition 2	Kinesin-1 heavy chain OS=Homo sapiens GN=KIF5B PE=1 SV=1	1.27213e+07	1.41433e+07	1.43389e+07	1.37345e+07	0.064284	1.10156e+07	1.17021e+07	9.20803e+06	1.06419e+07	0.121063	0.774832	0.639125	0.0265456	-0.368045	5.23539
Q9UNM6	3	3	241.8	0.0294136	1.2041	Condition 1	Condition 2	26S proteasome non-ATPase regulatory subunit 13 OS=Homo sapiens GN=PSMD13 PE=1 SV=2	2.2681e+07	2.40061e+07	2.2386e+07	2.30243e+07	0.0374794	2.11657e+07	1.8268e+07	1.79313e+07	1.91217e+07	0.0929914	0.830498	0.381245	0.0267794	-0.267952	5.22273
Q96QK1	12	12	728.48	0.0242917	1.17377	Condition 1	Condition 2	Vacuolar protein sorting-associated protein 35 OS=Homo sapiens GN=VPS35 PE=1 SV=2	2.49563e+08	2.44056e+08	2.73647e+08	2.55755e+08	0.0615318	2.1155e+08	2.11532e+08	2.30593e+08	2.17892e+08	0.0504826	0.851953	0.656417	0.0268867	-0.231154	5.21697
P20645	1	1	32.72	0.0235823	1.53873	Condition 1	Condition 2	Cation-dependent mannose-6-phosphate receptor OS=Homo sapiens GN=M6PR PE=1 SV=1	7.97088e+06	5.84942e+06	7.00801e+06	6.94277e+06	0.152998	3.89196e+06	5.14516e+06	4.49889e+06	4.512e+06	0.138897	0.649885	0.516413	0.0269352	-0.621745	5.21436
Q8NBJ7	1	1	43.16	0.0071796	1.51068	Condition 1	Condition 2	Sulfatase-modifying factor 2 OS=Homo sapiens GN=SUMF2 PE=1 SV=2	6.69762e+06	6.72249e+06	6.70171e+06	6.70727e+06	0.00198813	4.16133e+06	3.96648e+06	5.1919e+06	4.4399e+06	0.148312	0.661954	0.000819845	0.0269408	-0.595198	5.21406
Q13228	16	16	919.67	0.0219199	1.32421	Condition 1	Condition 2	Selenium-binding protein 1 OS=Homo sapiens GN=SELENBP1 PE=1 SV=2	2.17983e+09	2.61776e+09	2.75703e+09	2.5182e+09	0.119611	1.98812e+09	1.90132e+09	1.81556e+09	1.90167e+09	0.0453706	0.755169	0.151663	0.0270706	-0.405129	5.20713
P78417	3	3	126.83	0.0317886	1.13608	Condition 1	Condition 2	Glutathione S-transferase omega-1 OS=Homo sapiens GN=GSTO1 PE=1 SV=2	9.42714e+07	9.02884e+07	9.44758e+07	9.30119e+07	0.0253816	8.55995e+07	7.5999e+07	8.40136e+07	8.18707e+07	0.0628612	0.880218	0.347684	0.0270747	-0.184068	5.20691
P31946	11	6	630.58	0.0263916	1.15194	Condition 1	Condition 2	14-3-3 protein beta/alpha OS=Homo sapiens GN=YWHAB PE=1 SV=3	3.97098e+08	4.31936e+08	4.43388e+08	4.24141e+08	0.0568424	3.82625e+08	3.52243e+08	3.69721e+08	3.68196e+08	0.0414132	0.8681	0.57144	0.0273582	-0.204067	5.19188
Q9NY59	1	1	15.64	0.0293877	1.17003	Condition 1	Condition 2	Sphingomyelin phosphodiesterase 3 OS=Homo sapiens GN=SMPD3 PE=1 SV=1	4.42165e+08	4.12123e+08	4.38559e+08	4.30949e+08	0.0380624	3.57016e+08	3.48383e+08	3.99568e+08	3.68322e+08	0.0743965	0.854677	0.527604	0.0273641	-0.226549	5.19157
P26599	3	3	136.51	0.0174751	1.49742	Condition 1	Condition 2	Polypyrimidine tract-binding protein 1 OS=Homo sapiens GN=PTBP1 PE=1 SV=1	2.85759e+07	2.89452e+07	3.74357e+07	3.16523e+07	0.158346	2.3301e+07	2.05135e+07	1.95989e+07	2.11378e+07	0.0912291	0.667815	0.257894	0.0274988	-0.582481	5.18449
Q9NZU5	1	1	67.34	0.0344301	1.35014	Condition 1	Condition 2	LIM and cysteine-rich domains protein 1 OS=Homo sapiens GN=LMCD1 PE=1 SV=1	3.29849e+06	3.56786e+06	3.45835e+06	3.44157e+06	0.0393631	2.34335e+06	2.25218e+06	3.05159e+06	2.54904e+06	0.171672	0.740663	0.174913	0.0279227	-0.433111	5.16242
Q9BS26	2	2	67.89	0.0175096	1.49197	Condition 1	Condition 2	Endoplasmic reticulum resident protein 44 OS=Homo sapiens GN=ERP44 PE=1 SV=1	3.7359e+07	2.9759e+07	2.77532e+07	3.16237e+07	0.160232	2.31988e+07	2.00968e+07	2.0292e+07	2.11959e+07	0.0819658	0.670253	0.210381	0.0279978	-0.577223	5.15854
Q96CN7	2	2	86.22	0.0181282	1.61364	Condition 1	Condition 2	Isochorismatase domain-containing protein 1 OS=Homo sapiens GN=ISOC1 PE=1 SV=3	4.70352e+07	5.89057e+07	6.89559e+07	5.82989e+07	0.188218	3.63724e+07	3.90508e+07	3.29635e+07	3.61289e+07	0.0844457	0.619719	0.143519	0.0280026	-0.690315	5.15829
Q6ZNL6	1	1	19.23	0.0331022	1.3219	Condition 2	Condition 1	FYVE, RhoGEF and PH domain-containing protein 5 OS=Homo sapiens GN=FGD5 PE=1 SV=3	9.03298e+08	7.74932e+08	1.01529e+09	8.9784e+08	0.133956	1.16181e+09	1.28385e+09	1.1149e+09	1.18685e+09	0.0734831	1.3219	0.689241	0.0280564	0.402613	5.15552
P02549	10	10	610.89	0.00230456	1.81295	Condition 2	Condition 1	Spectrin alpha chain, erythrocytic 1 OS=Homo sapiens GN=SPTA1 PE=1 SV=5	5.26913e+07	5.36681e+07	5.61283e+07	5.41626e+07	0.0326987	1.0694e+08	1.05016e+08	8.26254e+07	9.81939e+07	0.137657	1.81295	0.0337548	0.0282647	0.858337	5.14485
A0FGR8	1	1	41.71	0.0212769	1.24529	Condition 1	Condition 2	Extended synaptotagmin-2 OS=Homo sapiens GN=ESYT2 PE=1 SV=1	7.10495e+06	7.41318e+06	8.55212e+06	7.69009e+06	0.0991257	5.95563e+06	6.26953e+06	6.30083e+06	6.17533e+06	0.0309147	0.803025	0.118039	0.028871	-0.316483	5.11424
P05165	2	2	63.82	0.023948	1.88891	Condition 1	Condition 2	Propionyl-CoA carboxylase alpha chain, mitochondrial OS=Homo sapiens GN=PCCA PE=1 SV=4	1.09152e+07	1.60887e+07	1.66528e+07	1.45522e+07	0.217313	6.97554e+06	9.56269e+06	6.57392e+06	7.70405e+06	0.210553	0.529407	0.416601	0.0289071	-0.917552	5.11243
P16152	5	5	436.29	0.0311478	1.24561	Condition 1	Condition 2	Carbonyl reductase [NADPH] 1 OS=Homo sapiens GN=CBR1 PE=1 SV=3	1.63689e+08	1.46278e+08	1.51048e+08	1.53672e+08	0.0585483	1.37701e+08	1.12664e+08	1.19746e+08	1.2337e+08	0.104611	0.802816	0.654107	0.0289433	-0.316858	5.11063
P02763	6	5	582.36	0.031175	1.21455	Condition 2	Condition 1	Alpha-1-acid glycoprotein 1 OS=Homo sapiens GN=ORM1 PE=1 SV=1	1.04201e+09	8.92575e+08	8.85666e+08	9.40085e+08	0.0939709	1.18268e+09	1.07752e+09	1.16514e+09	1.14178e+09	0.0493394	1.21455	0.578192	0.0289901	0.280422	5.1083
P63167	2	1	300.57	0.0254535	1.25267	Condition 1	Condition 2	Dynein light chain 1, cytoplasmic OS=Homo sapiens GN=DYNLL1 PE=1 SV=1	7.04928e+07	5.9193e+07	7.09262e+07	6.68707e+07	0.0994839	5.29095e+07	5.14161e+07	5.58222e+07	5.33826e+07	0.0419768	0.798296	0.203796	0.0291596	-0.325004	5.09989
P21810	4	4	193.52	0.0211108	1.4966	Condition 1	Condition 2	Biglycan OS=Homo sapiens GN=BGN PE=1 SV=2	1.89889e+08	2.39918e+08	2.65526e+08	2.31778e+08	0.165978	1.48619e+08	1.48298e+08	1.67691e+08	1.54869e+08	0.0717055	0.66818	0.153837	0.0291914	-0.581691	5.09831
P60953	2	2	181.32	0.0362094	1.31698	Condition 1	Condition 2	Cell division control protein 42 homolog OS=Homo sapiens GN=CDC42 PE=1 SV=2	4.42799e+07	5.15103e+07	4.75886e+07	4.77929e+07	0.0757331	3.77132e+07	4.02141e+07	3.09425e+07	3.62899e+07	0.132181	0.759316	0.725594	0.0295012	-0.397228	5.08308
Q8NBQ5	1	1	54.26	0.00278347	1.33868	Condition 2	Condition 1	Estradiol 17-beta-dehydrogenase 11 OS=Homo sapiens GN=HSD17B11 PE=1 SV=3	1.47304e+07	1.46711e+07	1.47895e+07	1.47303e+07	0.00401942	2.14019e+07	1.8434e+07	1.93218e+07	1.97193e+07	0.07725	1.33868	0.00301681	0.0295405	0.420814	5.08116
P49419	6	6	223.15	0.0218048	1.56136	Condition 1	Condition 2	Alpha-aminoadipic semialdehyde dehydrogenase OS=Homo sapiens GN=ALDH7A1 PE=1 SV=5	7.54386e+07	9.83052e+07	1.08251e+08	9.39982e+07	0.178989	6.55157e+07	5.47588e+07	6.03336e+07	6.02027e+07	0.0893589	0.640467	0.185511	0.0295476	-0.642803	5.08081
P01781	2	2	108.96	0.0495537	1.51755	Condition 2	Condition 1	Ig heavy chain V-III region GAL OS=Homo sapiens PE=1 SV=1	3.65042e+07	5.31775e+07	6.02297e+07	4.99704e+07	0.243815	7.10184e+07	7.4108e+07	8.23715e+07	7.58326e+07	0.0774043	1.51755	0.376769	0.0295912	0.601744	5.07869
O75489	3	3	186.8	0.024684	1.27231	Condition 1	Condition 2	NADH dehydrogenase [ubiquinone] iron-sulfur protein 3, mitochondrial OS=Homo sapiens GN=NDUFS3 PE=1 SV=1	8.14724e+07	6.83127e+07	7.04173e+07	7.34008e+07	0.0963066	6.24618e+07	5.60169e+07	5.45936e+07	5.76908e+07	0.0726749	0.78597	0.520467	0.0296335	-0.347454	5.07663
O00264	5	4	255.07	0.0278337	1.23374	Condition 1	Condition 2	Membrane-associated progesterone receptor component 1 OS=Homo sapiens GN=PGRMC1 PE=1 SV=3	1.43606e+08	1.42861e+08	1.63951e+08	1.50139e+08	0.0797058	1.22525e+08	1.12362e+08	1.30197e+08	1.21695e+08	0.0735169	0.810545	0.717059	0.030008	-0.303035	5.05851
O15061	3	3	69.25	0.0327575	1.16226	Condition 2	Condition 1	Synemin OS=Homo sapiens GN=SYNM PE=1 SV=2	4.36424e+07	5.03479e+07	4.53319e+07	4.64407e+07	0.0750976	5.19107e+07	5.43753e+07	5.56427e+07	5.39762e+07	0.0351589	1.16226	0.4569	0.0302947	0.216933	5.04479
P54652	10	1	469.37	0.0282392	1.38879	Condition 1	Condition 2	Heat shock-related 70 kDa protein 2 OS=Homo sapiens GN=HSPA2 PE=1 SV=1	4.34904e+06	4.55324e+06	3.5248e+06	4.14236e+06	0.131442	3.12608e+06	2.65799e+06	3.16408e+06	2.98272e+06	0.0944994	0.720053	0.422699	0.0306158	-0.473826	5.02958
Q9BSJ8	14	14	1076.05	0.0351151	1.12786	Condition 1	Condition 2	Extended synaptotagmin-1 OS=Homo sapiens GN=ESYT1 PE=1 SV=1	4.67659e+08	4.67653e+08	4.86059e+08	4.7379e+08	0.0224253	4.46059e+08	3.93021e+08	4.21152e+08	4.20078e+08	0.0631681	0.886632	0.27634	0.031235	-0.173592	5.00069
P09543	3	3	179.48	0.0262342	1.21359	Condition 1	Condition 2	2',3'-cyclic-nucleotide 3'-phosphodiesterase OS=Homo sapiens GN=CNP PE=1 SV=2	5.18819e+07	5.44159e+07	6.11022e+07	5.58e+07	0.0853662	4.59573e+07	4.38103e+07	4.81703e+07	4.59793e+07	0.0474139	0.824001	0.346365	0.0314633	-0.279282	4.99019
P52209	11	11	669.54	0.031076	1.18987	Condition 2	Condition 1	6-phosphogluconate dehydrogenase, decarboxylating OS=Homo sapiens GN=PGD PE=1 SV=3	6.58578e+08	5.77636e+08	5.90189e+08	6.08801e+08	0.0715548	7.69756e+08	6.82495e+08	7.20937e+08	7.24396e+08	0.0603718	1.18987	0.996094	0.0315674	0.250809	4.98542
P47897	1	1	30.85	0.0421043	1.56792	Condition 1	Condition 2	Glutamine--tRNA ligase OS=Homo sapiens GN=QARS PE=1 SV=1	1.07022e+07	9.162e+06	1.20517e+07	1.06386e+07	0.135911	7.37969e+06	5.1063e+06	7.86957e+06	6.78519e+06	0.217303	0.637786	0.98046	0.0319151	-0.648855	4.96961
P08758	20	18	1775.47	0.0333562	1.13478	Condition 2	Condition 1	Annexin A5 OS=Homo sapiens GN=ANXA5 PE=1 SV=2	3.41946e+09	3.62192e+09	3.80656e+09	3.61598e+09	0.0535455	4.23214e+09	3.90348e+09	4.17441e+09	4.10334e+09	0.0427641	1.13478	0.901921	0.0319618	0.182412	4.96751
Q96PD5	3	3	164.36	0.0402139	1.19616	Condition 1	Condition 2	N-acetylmuramoyl-L-alanine amidase OS=Homo sapiens GN=PGLYRP2 PE=1 SV=1	1.02188e+08	9.72672e+07	1.04571e+08	1.01342e+08	0.0367543	8.97367e+07	7.53811e+07	8.90508e+07	8.47229e+07	0.0955765	0.836009	0.349275	0.0319896	-0.258409	4.96625
P51665	1	1	16.99	0.045203	1.5253	Condition 1	Condition 2	26S proteasome non-ATPase regulatory subunit 7 OS=Homo sapiens GN=PSMD7 PE=1 SV=2	4.84924e+06	4.44453e+06	5.3497e+06	4.88116e+06	0.0928934	3.99249e+06	2.4325e+06	3.1754e+06	3.20013e+06	0.24383	0.655608	0.504876	0.0320878	-0.609094	4.96183
P01903	2	2	178.13	0.0707122	1.60471	Condition 2	Condition 1	HLA class II histocompatibility antigen, DR alpha chain OS=Homo sapiens GN=HLA-DRA PE=1 SV=1	1.64779e+07	2.98976e+07	3.15624e+07	2.59793e+07	0.318347	4.17658e+07	3.99968e+07	4.33054e+07	4.16893e+07	0.0397134	1.60471	0.0770608	0.0320942	0.682315	4.96154
Q04917	10	6	542.66	0.00482604	1.20373	Condition 2	Condition 1	14-3-3 protein eta OS=Homo sapiens GN=YWHAH PE=1 SV=4	1.78668e+08	1.81456e+08	1.80916e+08	1.80347e+08	0.00819933	2.20134e+08	2.03854e+08	2.27278e+08	2.17089e+08	0.0553008	1.20373	0.02989	0.0321562	0.267512	4.95876
Q15041	1	1	28.4	0.00325311	1.57242	Condition 1	Condition 2	ADP-ribosylation factor-like protein 6-interacting protein 1 OS=Homo sapiens GN=ARL6IP1 PE=1 SV=2	1.13541e+07	1.44156e+07	1.25405e+07	1.27701e+07	0.120879	8.39116e+06	7.98558e+06	7.98715e+06	8.1213e+06	0.0287778	0.635964	0.0448192	0.0323871	-0.652984	4.94844
P35613	3	3	212.97	0.0239694	1.38032	Condition 1	Condition 2	Basigin OS=Homo sapiens GN=BSG PE=1 SV=2	7.68765e+07	9.13385e+07	1.02866e+08	9.03603e+07	0.144115	6.92405e+07	6.38275e+07	6.33222e+07	6.54634e+07	0.0501171	0.724471	0.119372	0.0325542	-0.465	4.94101
Q5VT79	4	4	307.93	0.0324652	1.1877	Condition 1	Condition 2	Annexin A8-like protein 2 OS=Homo sapiens GN=ANXA8L2 PE=2 SV=1	4.07045e+07	3.64544e+07	4.11863e+07	3.94484e+07	0.0660118	3.14203e+07	3.26452e+07	3.55765e+07	3.3214e+07	0.0643014	0.841961	0.804285	0.0327046	-0.248174	4.93436
Q96I99	8	8	524.22	0.00220864	1.76618	Condition 1	Condition 2	Succinyl-CoA ligase [GDP-forming] subunit beta, mitochondrial OS=Homo sapiens GN=SUCLG2 PE=1 SV=2	2.17645e+08	2.1665e+08	2.75363e+08	2.36553e+08	0.142101	1.37113e+08	1.3434e+08	1.30351e+08	1.33935e+08	0.0253774	0.566194	0.0202413	0.0328351	-0.820633	4.92862
Q9UFN0	1	1	66.59	0.0239754	1.45647	Condition 1	Condition 2	Protein NipSnap homolog 3A OS=Homo sapiens GN=NIPSNAP3A PE=1 SV=2	1.82767e+07	1.3415e+07	1.52888e+07	1.56602e+07	0.156579	1.19207e+07	1.03586e+07	9.97717e+06	1.07522e+07	0.0957752	0.686593	0.299864	0.0330133	-0.542473	4.92081
P60852	1	1	16.24	0.0286503	1.60846	Condition 2	Condition 1	Zona pellucida sperm-binding protein 1 OS=Homo sapiens GN=ZP1 PE=2 SV=1	1.14144e+08	7.958e+07	8.58133e+07	9.31792e+07	0.197703	1.77912e+08	1.40009e+08	1.31704e+08	1.49875e+08	0.164357	1.60846	0.717356	0.033137	0.685679	4.91541
P28838	8	8	555.88	0.0359836	1.20958	Condition 1	Condition 2	Cytosol aminopeptidase OS=Homo sapiens GN=LAP3 PE=1 SV=3	2.23219e+08	2.18409e+08	2.44299e+08	2.28642e+08	0.0602295	2.03689e+08	1.71096e+08	1.92291e+08	1.89026e+08	0.0875018	0.826731	0.818801	0.0332732	-0.27451	4.90949
P16671	9	9	713.13	0.0411043	1.40662	Condition 2	Condition 1	Platelet glycoprotein 4 OS=Homo sapiens GN=CD36 PE=1 SV=2	7.14703e+08	9.46519e+08	9.79174e+08	8.80132e+08	0.163831	1.2253e+09	1.37469e+09	1.11404e+09	1.23801e+09	0.105643	1.40662	0.902727	0.0334027	0.49223	4.90389
Q86Y39	1	1	16.09	0.032775	1.21352	Condition 1	Condition 2	NADH dehydrogenase [ubiquinone] 1 alpha subcomplex subunit 11 OS=Homo sapiens GN=NDUFA11 PE=1 SV=3	6.90332e+06	6.96341e+06	7.85997e+06	7.24223e+06	0.0739853	6.27408e+06	5.463e+06	6.16678e+06	5.96795e+06	0.073825	0.824049	0.806767	0.0334815	-0.279199	4.90049
P62269	1	1	21.73	0.036386	1.20578	Condition 2	Condition 1	40S ribosomal protein S18 OS=Homo sapiens GN=RPS18 PE=1 SV=3	3.97025e+06	4.06019e+06	4.74525e+06	4.25856e+06	0.0995341	4.90891e+06	5.14875e+06	5.347e+06	5.13488e+06	0.0427219	1.20578	0.422526	0.0335285	0.269965	4.89847
P15531	6	2	290.96	0.0374265	1.12665	Condition 2	Condition 1	Nucleoside diphosphate kinase A OS=Homo sapiens GN=NME1 PE=1 SV=1	2.26211e+07	2.49132e+07	2.52327e+07	2.42557e+07	0.0587317	2.65027e+07	2.82536e+07	2.72268e+07	2.73277e+07	0.0321946	1.12665	0.552211	0.0336039	0.172041	4.89523
P07741	3	3	123.59	0.0276467	1.26773	Condition 1	Condition 2	Adenine phosphoribosyltransferase OS=Homo sapiens GN=APRT PE=1 SV=2	6.92639e+07	7.62794e+07	8.57428e+07	7.70954e+07	0.107266	6.11212e+07	5.73786e+07	6.39407e+07	6.08135e+07	0.0541299	0.788809	0.273556	0.0339107	-0.342253	4.88211
Q9BZV2	1	1	32.37	0.0356184	1.10856	Condition 2	Condition 1	Thiamine transporter 2 OS=Homo sapiens GN=SLC19A3 PE=1 SV=1	3.54627e+07	3.86704e+07	3.82027e+07	3.74453e+07	0.0462753	4.31181e+07	4.07292e+07	4.0684e+07	4.15104e+07	0.0335443	1.10856	0.784742	0.0339403	0.14869	4.88086
P00734	11	11	546.42	0.0421297	1.28433	Condition 2	Condition 1	Prothrombin OS=Homo sapiens GN=F2 PE=1 SV=2	2.21456e+08	2.47551e+08	2.96673e+08	2.55227e+08	0.149636	3.40349e+08	3.22295e+08	3.20744e+08	3.27796e+08	0.0332486	1.28433	0.150612	0.0340257	0.36102	4.87723
Q9BW30	1	1	22.39	0.0163592	4.29038	Condition 1	Condition 2	Tubulin polymerization-promoting protein family member 3 OS=Homo sapiens GN=TPPP3 PE=1 SV=1	2.57313e+06	1.35074e+06	1.33339e+06	1.75242e+06	0.405615	209973	422637	592753	408454	0.469535	0.23308	0.135715	0.0341243	-2.1011	4.87306
P84098	1	1	123.17	0.0292573	1.2299	Condition 2	Condition 1	60S ribosomal protein L19 OS=Homo sapiens GN=RPL19 PE=1 SV=1	2.85285e+07	3.07739e+07	3.15006e+07	3.02677e+07	0.0511887	4.09406e+07	3.67402e+07	3.39975e+07	3.72261e+07	0.0939391	1.2299	0.328178	0.0344789	0.298536	4.85814
O43301	7	7	468.1	0.0324632	1.20431	Condition 2	Condition 1	Heat shock 70 kDa protein 12A OS=Homo sapiens GN=HSPA12A PE=1 SV=2	2.07322e+08	2.04426e+08	2.26816e+08	2.12855e+08	0.057209	2.72691e+08	2.33176e+08	2.63162e+08	2.56343e+08	0.0804432	1.20431	0.517109	0.0346704	0.268207	4.85015
P27816	13	13	599.7	0.0322596	1.11081	Condition 2	Condition 1	Microtubule-associated protein 4 OS=Homo sapiens GN=MAP4 PE=1 SV=3	4.72806e+08	4.56906e+08	4.70618e+08	4.66776e+08	0.0184628	5.44031e+08	4.89748e+08	5.21718e+08	5.18499e+08	0.0526211	1.11081	0.181437	0.0351513	0.15161	4.83028
P48047	6	6	415.93	0.00376314	1.51763	Condition 1	Condition 2	ATP synthase subunit O, mitochondrial OS=Homo sapiens GN=ATP5O PE=1 SV=1	2.47091e+08	2.17614e+08	2.74848e+08	2.46518e+08	0.116104	1.60094e+08	1.65493e+08	1.61721e+08	1.62436e+08	0.0170512	0.658921	0.0185553	0.035459	-0.601822	4.8177
O75874	9	8	572.16	0.0253206	1.43178	Condition 1	Condition 2	Isocitrate dehydrogenase [NADP] cytoplasmic OS=Homo sapiens GN=IDH1 PE=1 SV=2	1.81466e+08	2.23228e+08	2.53232e+08	2.19308e+08	0.16435	1.5562e+08	1.585e+08	1.45396e+08	1.53172e+08	0.0449587	0.698432	0.0704362	0.0354684	-0.517808	4.81732
Q14697	8	8	583.24	0.0277542	1.29147	Condition 1	Condition 2	Neutral alpha-glucosidase AB OS=Homo sapiens GN=GANAB PE=1 SV=3	3.52569e+08	3.81584e+08	4.42261e+08	3.92138e+08	0.116713	3.01998e+08	2.86513e+08	3.22401e+08	3.03637e+08	0.0592827	0.774313	0.267927	0.0356347	-0.369012	4.81057
P62857	1	1	65.25	0.00988628	3.70694	Condition 1	Condition 2	40S ribosomal protein S28 OS=Homo sapiens GN=RPS28 PE=1 SV=1	1.02096e+07	1.4775e+07	2.28716e+07	1.59521e+07	0.401989	3.17985e+06	5.27525e+06	4.45478e+06	4.30329e+06	0.245366	0.269764	0.0527938	0.0360612	-1.89023	4.79341
P22413	1	1	17.54	0.0644285	1.53696	Condition 2	Condition 1	Ectonucleotide pyrophosphatase/phosphodiesterase family member 1 OS=Homo sapiens GN=ENPP1 PE=1 SV=2	1.91201e+06	2.9125e+06	3.50043e+06	2.77498e+06	0.289405	4.36065e+06	4.41562e+06	4.01884e+06	4.26504e+06	0.0504043	1.53696	0.133729	0.0360687	0.620082	4.79311
P37802	9	9	654.9	0.0241695	1.38361	Condition 1	Condition 2	Transgelin-2 OS=Homo sapiens GN=TAGLN2 PE=1 SV=3	4.75157e+08	5.30354e+08	6.379e+08	5.47804e+08	0.151081	4.14845e+08	3.94765e+08	3.7816e+08	3.95923e+08	0.0463974	0.722746	0.0939036	0.0361153	-0.468439	4.79125
O15173	6	5	428	0.0420537	1.26665	Condition 2	Condition 1	Membrane-associated progesterone receptor component 2 OS=Homo sapiens GN=PGRMC2 PE=1 SV=1	7.83006e+07	9.14617e+07	9.91616e+07	8.96413e+07	0.11768	1.20097e+08	1.04384e+08	1.16151e+08	1.13544e+08	0.071996	1.26665	0.750398	0.0361458	0.341013	4.79003
P05166	3	3	177.89	0.00235834	2.04583	Condition 1	Condition 2	Propionyl-CoA carboxylase beta chain, mitochondrial OS=Homo sapiens GN=PCCB PE=1 SV=3	3.78395e+07	4.10702e+07	5.27042e+07	4.38713e+07	0.178208	2.03627e+07	2.20743e+07	2.18958e+07	2.14443e+07	0.0438767	0.4888	0.0285535	0.0365502	-1.03268	4.77398
P01717	1	1	63.97	0.0378372	1.39128	Condition 2	Condition 1	Ig lambda chain V-IV region Hil OS=Homo sapiens PE=1 SV=1	8.57105e+07	1.00725e+08	1.16571e+08	1.01002e+08	0.152789	1.329e+08	1.2982e+08	1.58847e+08	1.40522e+08	0.113464	1.39128	0.967362	0.0367575	0.476413	4.76582
Q15907	3	3	283.29	0.0415991	1.13441	Condition 1	Condition 2	Ras-related protein Rab-11B OS=Homo sapiens GN=RAB11B PE=1 SV=4	5.3653e+07	5.66621e+07	5.46324e+07	5.49825e+07	0.0279144	5.15279e+07	4.89466e+07	4.49289e+07	4.84678e+07	0.0686111	0.881513	0.351215	0.0369002	-0.181946	4.76023
Q8NCW5	1	1	59.92	0.030143	1.25874	Condition 1	Condition 2	NAD(P)H-hydrate epimerase OS=Homo sapiens GN=APOA1BP PE=1 SV=2	1.2599e+07	1.49335e+07	1.24808e+07	1.33378e+07	0.103708	1.06929e+07	9.87236e+06	1.12232e+07	1.05962e+07	0.0642299	0.794448	0.389815	0.0369206	-0.331975	4.75943
P83731	1	1	21.14	0.0276413	1.34163	Condition 1	Condition 2	60S ribosomal protein L24 OS=Homo sapiens GN=RPL24 PE=1 SV=1	7.99201e+06	8.015e+06	9.99851e+06	8.6685e+06	0.13288	6.82009e+06	5.92863e+06	6.63486e+06	6.46119e+06	0.0728068	0.745364	0.285889	0.0371943	-0.423982	4.74878
P34896	2	2	160.65	0.00291025	1.88579	Condition 1	Condition 2	Serine hydroxymethyltransferase, cytosolic OS=Homo sapiens GN=SHMT1 PE=1 SV=1	2.35117e+07	2.66372e+07	3.24777e+07	2.75422e+07	0.165237	1.51072e+07	1.40338e+07	1.46744e+07	1.46051e+07	0.0369787	0.530282	0.0277752	0.037241	-0.915169	4.74697
Q7L5N1	1	1	17.07	0.0418062	1.31868	Condition 1	Condition 2	COP9 signalosome complex subunit 6 OS=Homo sapiens GN=COPS6 PE=1 SV=1	3.2146e+06	2.80425e+06	3.3843e+06	3.13439e+06	0.0951475	2.6555e+06	2.42678e+06	2.04844e+06	2.37691e+06	0.128985	0.758332	0.972369	0.0373845	-0.399098	4.74142
Q9Y490	55	53	4763.87	0.0054283	1.27875	Condition 1	Condition 2	Talin-1 OS=Homo sapiens GN=TLN1 PE=1 SV=3	2.03804e+09	2.14706e+09	2.3683e+09	2.18447e+09	0.0770324	1.7286e+09	1.70944e+09	1.68679e+09	1.70828e+09	0.0122513	0.782012	0.0304656	0.0374156	-0.354737	4.74022
Q9NZ45	2	2	164.47	0.00498978	1.43106	Condition 1	Condition 2	CDGSH iron-sulfur domain-containing protein 1 OS=Homo sapiens GN=CISD1 PE=1 SV=1	2.95786e+07	2.57303e+07	3.18426e+07	2.90505e+07	0.106372	1.99696e+07	2.06847e+07	2.02456e+07	2.03e+07	0.0177639	0.698782	0.0268696	0.0375712	-0.517086	4.73423
P17858	4	3	227.3	0.0331185	1.16806	Condition 1	Condition 2	6-phosphofructokinase, liver type OS=Homo sapiens GN=PFKL PE=1 SV=6	4.8351e+07	4.95765e+07	5.53403e+07	5.10893e+07	0.0730517	4.50375e+07	4.16159e+07	4.45619e+07	4.37384e+07	0.0423772	0.856118	0.395694	0.0378288	-0.224118	4.72437
P36969	3	3	119	0.0296134	1.28392	Condition 2	Condition 1	Phospholipid hydroperoxide glutathione peroxidase, mitochondrial OS=Homo sapiens GN=GPX4 PE=1 SV=3	1.09572e+08	1.2368e+08	1.20054e+08	1.17769e+08	0.0622117	1.71401e+08	1.42398e+08	1.39819e+08	1.51206e+08	0.11598	1.28392	0.297208	0.0381312	0.36056	4.71288
P50225	2	2	53.11	0.0316585	1.4319	Condition 2	Condition 1	Sulfotransferase 1A1 OS=Homo sapiens GN=SULT1A1 PE=1 SV=3	1.16987e+07	1.33739e+07	1.43212e+07	1.31313e+07	0.101132	1.88569e+07	2.17284e+07	1.58226e+07	1.88026e+07	0.157066	1.4319	0.336387	0.038644	0.517929	4.69361
Q969X1	1	1	76.74	0.0423187	1.21355	Condition 2	Condition 1	Protein lifeguard 3 OS=Homo sapiens GN=TMBIM1 PE=1 SV=2	1.08763e+07	1.13829e+07	1.33257e+07	1.18616e+07	0.109003	1.37209e+07	1.50188e+07	1.44442e+07	1.43946e+07	0.0451825	1.21355	0.40387	0.0387308	0.279228	4.69037
P30041	14	14	1084.37	0.0293343	1.20409	Condition 1	Condition 2	Peroxiredoxin-6 OS=Homo sapiens GN=PRDX6 PE=1 SV=3	4.04027e+09	4.04461e+09	4.74846e+09	4.27778e+09	0.0952889	3.50122e+09	3.64113e+09	3.5158e+09	3.55272e+09	0.0216492	0.830505	0.0687573	0.0388772	-0.267939	4.68493
P41567	1	1	59.27	0.0166365	2.05808	Condition 1	Condition 2	Eukaryotic translation initiation factor 1 OS=Homo sapiens GN=EIF1 PE=1 SV=1	1.13076e+07	6.9819e+06	7.21466e+06	8.50138e+06	0.286192	4.65156e+06	4.2584e+06	3.48226e+06	4.13074e+06	0.144044	0.485891	0.112865	0.0390727	-1.0413	4.6777
Q9H8H3	3	3	167.69	0.034319	1.17847	Condition 2	Condition 1	Methyltransferase-like protein 7A OS=Homo sapiens GN=METTL7A PE=1 SV=1	1.46752e+08	1.54693e+08	1.61533e+08	1.54326e+08	0.0479322	1.97613e+08	1.71045e+08	1.76949e+08	1.81869e+08	0.0767086	1.17847	0.438895	0.0391206	0.236916	4.67593
Q9NYQ7	1	1	17.81	0.0435844	1.6903	Condition 1	Condition 2	Cadherin EGF LAG seven-pass G-type receptor 3 OS=Homo sapiens GN=CELSR3 PE=1 SV=2	2.75543e+07	2.5781e+07	1.87346e+07	2.40233e+07	0.194194	1.65866e+07	1.54089e+07	1.06418e+07	1.42124e+07	0.221483	0.59161	0.625697	0.0391851	-0.757281	4.67355
Q9UJ70	1	1	39.55	0.0404684	1.31538	Condition 1	Condition 2	N-acetyl-D-glucosamine kinase OS=Homo sapiens GN=NAGK PE=1 SV=4	1.02363e+07	1.23459e+07	1.18978e+07	1.14933e+07	0.0967063	7.88999e+06	1.00187e+07	8.30418e+06	8.73763e+06	0.129167	0.760234	0.9847	0.0394252	-0.395485	4.66474
P29692	2	2	118.89	0.0292497	1.39798	Condition 1	Condition 2	Elongation factor 1-delta OS=Homo sapiens GN=EEF1D PE=1 SV=5	7.98035e+07	8.74263e+07	1.06588e+08	9.12727e+07	0.151201	7.15032e+07	6.00801e+07	6.42836e+07	6.5289e+07	0.0884917	0.715317	0.298257	0.0396223	-0.483345	4.65754
P30153	7	7	338.12	0.0331744	1.17872	Condition 1	Condition 2	Serine/threonine-protein phosphatase 2A 65 kDa regulatory subunit A alpha isoform OS=Homo sapiens GN=PPP2R1A PE=1 SV=4	1.60043e+08	1.57059e+08	1.81756e+08	1.66286e+08	0.081066	1.34848e+08	1.44262e+08	1.4411e+08	1.41073e+08	0.0382222	0.848379	0.275869	0.0396351	-0.23722	4.65708
O75083	6	6	408.06	0.0387357	1.18358	Condition 1	Condition 2	WD repeat-containing protein 1 OS=Homo sapiens GN=WDR1 PE=1 SV=4	1.21665e+08	1.36517e+08	1.39804e+08	1.32662e+08	0.0728503	1.19862e+08	1.09674e+08	1.06719e+08	1.12085e+08	0.0615188	0.844894	0.674659	0.0398644	-0.243158	4.64876
P11021	19	17	1198.68	0.0332479	1.1789	Condition 1	Condition 2	78 kDa glucose-regulated protein OS=Homo sapiens GN=HSPA5 PE=1 SV=2	1.28549e+09	1.29419e+09	1.48214e+09	1.35394e+09	0.0820661	1.19427e+09	1.10962e+09	1.14153e+09	1.14847e+09	0.0372242	0.848245	0.257894	0.0403683	-0.237446	4.63063
P62277	1	1	15.09	0.0325225	1.28829	Condition 1	Condition 2	40S ribosomal protein S13 OS=Homo sapiens GN=RPS13 PE=1 SV=2	1.00408e+07	9.19933e+06	7.76625e+06	9.00213e+06	0.12775	7.14778e+06	7.05137e+06	6.76387e+06	6.98767e+06	0.0285819	0.776225	0.0585547	0.0403689	-0.365454	4.63061
O14896	1	1	14.26	0.0438242	1.37292	Condition 2	Condition 1	Interferon regulatory factor 6 OS=Homo sapiens GN=IRF6 PE=1 SV=1	1.31349e+08	1.44303e+08	1.83165e+08	1.52939e+08	0.176318	2.01751e+08	1.96333e+08	2.31836e+08	2.09973e+08	0.0910885	1.37292	0.669387	0.040415	0.457247	4.62896
P48444	3	3	217.82	0.0346279	1.1393	Condition 1	Condition 2	Coatomer subunit delta OS=Homo sapiens GN=ARCN1 PE=1 SV=1	2.71771e+07	2.3657e+07	2.50903e+07	2.53081e+07	0.0699426	2.21976e+07	2.19207e+07	2.25226e+07	2.22137e+07	0.0135626	0.877728	0.0563058	0.0405382	-0.188153	4.62457
Q14151	1	1	14.95	0.0389246	1.67181	Condition 2	Condition 1	Scaffold attachment factor B2 OS=Homo sapiens GN=SAFB2 PE=1 SV=1	1.19451e+07	1.62053e+07	1.90126e+07	1.5721e+07	0.226359	3.20509e+07	2.35047e+07	2.32919e+07	2.62825e+07	0.190116	1.67181	0.673042	0.0406559	0.741412	4.62039
P43487	2	2	45.18	0.0410168	1.2889	Condition 1	Condition 2	Ran-specific GTPase-activating protein OS=Homo sapiens GN=RANBP1 PE=1 SV=1	4.48276e+07	4.07415e+07	4.94739e+07	4.50143e+07	0.097062	3.88635e+07	3.10465e+07	3.48637e+07	3.49246e+07	0.111924	0.775854	0.889133	0.0406995	-0.366143	4.61884
P48509	1	1	50.65	0.0451398	1.32799	Condition 2	Condition 1	CD151 antigen OS=Homo sapiens GN=CD151 PE=1 SV=3	2.26892e+07	2.55623e+07	3.03953e+07	2.62156e+07	0.148551	3.14065e+07	3.54009e+07	3.7635e+07	3.48141e+07	0.0906374	1.32799	0.792657	0.0410911	0.409245	4.60503
Q9P219	1	1	14.33	0.00564264	1.49073	Condition 1	Condition 2	Protein Daple OS=Homo sapiens GN=CCDC88C PE=1 SV=3	3.36153e+07	2.78781e+07	3.53407e+07	3.22781e+07	0.121039	2.20228e+07	2.12942e+07	2.16404e+07	2.16525e+07	0.0168315	0.670811	0.0172531	0.0411806	-0.576021	4.60189
Q9BXN1	9	9	599.96	0.035364	1.33628	Condition 1	Condition 2	Asporin OS=Homo sapiens GN=ASPN PE=1 SV=2	3.31073e+08	4.0798e+08	4.36276e+08	3.91776e+08	0.13896	3.09858e+08	2.72938e+08	2.96759e+08	2.93185e+08	0.063842	0.748348	0.211422	0.0412968	-0.418218	4.59783
P23528	6	5	662.43	0.0441097	1.2343	Condition 1	Condition 2	Cofilin-1 OS=Homo sapiens GN=CFL1 PE=1 SV=3	5.68046e+08	5.99616e+08	6.57031e+08	6.08231e+08	0.0741719	5.38986e+08	4.99852e+08	4.39481e+08	4.92773e+08	0.101728	0.810175	0.894974	0.0413372	-0.303695	4.59641
P58546	1	1	103.33	0.0324297	1.22831	Condition 1	Condition 2	Myotrophin OS=Homo sapiens GN=MTPN PE=1 SV=2	9.04981e+07	9.01477e+07	1.07557e+08	9.60677e+07	0.103593	8.0089e+07	7.4467e+07	8.00782e+07	7.82114e+07	0.0414613	0.814128	0.191964	0.0417676	-0.296673	4.58147
P12694	1	1	34.52	0.0279171	2.05432	Condition 1	Condition 2	2-oxoisovalerate dehydrogenase subunit alpha, mitochondrial OS=Homo sapiens GN=BCKDHA PE=1 SV=2	2.26053e+06	4.06163e+06	3.98906e+06	3.43708e+06	0.296636	1.46997e+06	1.68015e+06	1.86917e+06	1.6731e+06	0.119357	0.486779	0.0738905	0.042355	-1.03866	4.56132
Q16853	15	15	1417.58	0.00838479	1.18751	Condition 2	Condition 1	Membrane primary amine oxidase OS=Homo sapiens GN=AOC3 PE=1 SV=3	4.25293e+09	4.22039e+09	4.31155e+09	4.26162e+09	0.0108398	5.0304e+09	5.37977e+09	4.77199e+09	5.06072e+09	0.0602724	1.18751	0.0448446	0.0425547	0.24794	4.55454
P01605	2	2	59.73	0.032324	1.25846	Condition 2	Condition 1	Ig kappa chain V-I region Lay OS=Homo sapiens PE=1 SV=1	9.04106e+07	9.0612e+07	9.84758e+07	9.31661e+07	0.0493677	1.08523e+08	1.10445e+08	1.32769e+08	1.17246e+08	0.114957	1.25846	0.208606	0.0428748	0.331657	4.54373
Q01082	68	63	5490.2	0.0453523	1.11101	Condition 2	Condition 1	Spectrin beta chain, non-erythrocytic 1 OS=Homo sapiens GN=SPTBN1 PE=1 SV=2	2.40394e+09	2.50046e+09	2.69823e+09	2.53421e+09	0.059198	2.89891e+09	2.78058e+09	2.76713e+09	2.81554e+09	0.0257541	1.11101	0.378759	0.0430563	0.151873	4.53763
P62070	2	1	192.94	0.14208	2.05144	Condition 2	Condition 1	Ras-related protein R-Ras2 OS=Homo sapiens GN=RRAS2 PE=1 SV=1	1.11611e+06	4.79951e+06	5.26377e+06	3.72646e+06	0.609832	7.95824e+06	7.05848e+06	7.91713e+06	7.64461e+06	0.0664555	2.05144	0.095194	0.0434875	1.03664	4.52326
O95989	1	1	24.78	0.0689143	1.50687	Condition 1	Condition 2	Diphosphoinositol polyphosphate phosphohydrolase 1 OS=Homo sapiens GN=NUDT3 PE=1 SV=1	2.40819e+06	1.98219e+06	2.25841e+06	2.21626e+06	0.0975097	1.03417e+06	1.77104e+06	1.60712e+06	1.47077e+06	0.263054	0.663628	0.47561	0.0435172	-0.591553	4.52227
P04839	1	1	35.59	0.0381853	1.4823	Condition 1	Condition 2	Cytochrome b-245 heavy chain OS=Homo sapiens GN=CYBB PE=1 SV=2	8.21004e+06	6.16313e+06	6.40127e+06	6.92481e+06	0.16165	5.3698e+06	4.74266e+06	3.90252e+06	4.67166e+06	0.15759	0.674627	0.603889	0.0435552	-0.567839	4.52101
P36542	1	1	20.41	0.0330836	1.45699	Condition 1	Condition 2	ATP synthase subunit gamma, mitochondrial OS=Homo sapiens GN=ATP5C1 PE=1 SV=1	2.07775e+07	1.43377e+07	1.88318e+07	1.79823e+07	0.183672	1.20977e+07	1.30209e+07	1.19076e+07	1.23421e+07	0.0482504	0.686345	0.0629704	0.0436399	-0.542995	4.51821
P18859	1	1	121.74	0.0420876	1.39568	Condition 1	Condition 2	ATP synthase-coupling factor 6, mitochondrial OS=Homo sapiens GN=ATP5J PE=1 SV=1	4.01021e+06	5.11971e+06	5.1772e+06	4.76904e+06	0.13793	3.9498e+06	3.09594e+06	3.20526e+06	3.417e+06	0.13598	0.716496	0.665737	0.0437737	-0.480969	4.51379
P17987	3	3	204.74	0.0417101	1.21648	Condition 1	Condition 2	T-complex protein 1 subunit alpha OS=Homo sapiens GN=TCP1 PE=1 SV=1	3.12766e+07	2.69036e+07	2.82291e+07	2.88031e+07	0.0778496	2.60727e+07	2.25148e+07	2.24449e+07	2.36775e+07	0.0876212	0.822045	0.922441	0.0438465	-0.28271	4.51139
O14745	1	1	18.56	0.0469022	1.22363	Condition 1	Condition 2	Na(+)/H(+) exchange regulatory cofactor NHE-RF1 OS=Homo sapiens GN=SLC9A3R1 PE=1 SV=4	1.66448e+07	1.68006e+07	1.84293e+07	1.72915e+07	0.0571605	1.27937e+07	1.36887e+07	1.59115e+07	1.41313e+07	0.113603	0.817238	0.549745	0.0439652	-0.291171	4.50749
Q07954	6	6	231.05	0.0359564	1.19126	Condition 1	Condition 2	Prolow-density lipoprotein receptor-related protein 1 OS=Homo sapiens GN=LRP1 PE=1 SV=2	6.06932e+07	6.47711e+07	7.28781e+07	6.61141e+07	0.0938145	5.63132e+07	5.39107e+07	5.62747e+07	5.54995e+07	0.0247951	0.83945	0.0938302	0.0443937	-0.252484	4.4935
O60784	1	1	35.11	0.0498922	1.41885	Condition 1	Condition 2	Target of Myb protein 1 OS=Homo sapiens GN=TOM1 PE=1 SV=2	5.06781e+06	5.11595e+06	6.29805e+06	5.49394e+06	0.12683	4.14797e+06	3.10125e+06	4.36711e+06	3.87211e+06	0.174715	0.704797	0.97047	0.0444541	-0.50472	4.49154
P11413	8	8	341.28	0.0345949	1.29067	Condition 1	Condition 2	Glucose-6-phosphate 1-dehydrogenase OS=Homo sapiens GN=G6PD PE=1 SV=4	9.54919e+07	1.0414e+08	1.22109e+08	1.07247e+08	0.126604	7.88841e+07	8.17838e+07	8.86135e+07	8.30938e+07	0.0601155	0.77479	0.238424	0.0444914	-0.368123	4.49033
P00352	19	18	1418.58	0.04127	1.21941	Condition 1	Condition 2	Retinal dehydrogenase 1 OS=Homo sapiens GN=ALDH1A1 PE=1 SV=2	2.28142e+09	2.59618e+09	2.75476e+09	2.54412e+09	0.0947002	2.22833e+09	2.06036e+09	1.97037e+09	2.08636e+09	0.0627557	0.820071	0.455992	0.0444967	-0.286179	4.49016
Q06278	2	2	55.66	0.033042	1.34075	Condition 1	Condition 2	Aldehyde oxidase OS=Homo sapiens GN=AOX1 PE=2 SV=2	8.94576e+06	7.2949e+06	6.85062e+06	7.69709e+06	0.143425	5.81562e+06	6.09767e+06	5.30942e+06	5.7409e+06	0.0695715	0.745853	0.231488	0.0447385	-0.423036	4.48234
P30044	5	4	436.99	0.00529	1.76552	Condition 1	Condition 2	Peroxiredoxin-5, mitochondrial OS=Homo sapiens GN=PRDX5 PE=1 SV=4	2.01227e+08	2.52111e+08	2.82567e+08	2.45302e+08	0.16753	1.36219e+08	1.36479e+08	1.44121e+08	1.3894e+08	0.03231	0.566404	0.023584	0.0448526	-0.820096	4.47867
P36269	3	3	166.88	0.00614663	1.43027	Condition 1	Condition 2	Gamma-glutamyltransferase 5 OS=Homo sapiens GN=GGT5 PE=1 SV=2	3.55344e+07	3.89014e+07	4.46407e+07	3.96922e+07	0.116001	2.7378e+07	2.76787e+07	2.81976e+07	2.77514e+07	0.01494	0.699166	0.0160865	0.0451446	-0.516292	4.4693
Q96HM7	1	1	27.12	0.0874489	1.53243	Condition 2	Condition 1	PC-esterase domain-containing protein 1B OS=Homo sapiens GN=PCED1B PE=2 SV=1	1.48469e+08	2.74895e+08	2.73618e+08	2.32327e+08	0.312604	3.66501e+08	3.36905e+08	3.64666e+08	3.56024e+08	0.0465782	1.53243	0.0991048	0.0451943	0.615818	4.46772
P27144	2	2	95.22	0.0352651	1.64291	Condition 1	Condition 2	Adenylate kinase isoenzyme 4, mitochondrial OS=Homo sapiens GN=AK4 PE=1 SV=1	3.36302e+07	5.12059e+07	5.22019e+07	4.56793e+07	0.228696	3.08812e+07	2.65989e+07	2.59317e+07	2.78039e+07	0.0965974	0.608676	0.123999	0.0454513	-0.716253	4.45954
Q8WZA0	1	1	20.79	0.031434	1.4371	Condition 1	Condition 2	Protein LZIC OS=Homo sapiens GN=LZIC PE=1 SV=1	2.81247e+06	3.38957e+06	4.05254e+06	3.4182e+06	0.181538	2.40997e+06	2.26357e+06	2.46206e+06	2.37853e+06	0.0432664	0.695845	0.053535	0.0457981	-0.523163	4.44857
P43307	2	2	104.95	0.0432024	1.33976	Condition 1	Condition 2	Translocon-associated protein subunit alpha OS=Homo sapiens GN=SSR1 PE=1 SV=3	2.72201e+07	2.12955e+07	2.32353e+07	2.3917e+07	0.126293	1.85654e+07	1.55049e+07	1.94849e+07	1.78517e+07	0.116725	0.746404	0.644896	0.0457988	-0.421971	4.44855
P55060	6	5	265.95	0.0346172	1.25867	Condition 1	Condition 2	Exportin-2 OS=Homo sapiens GN=CSE1L PE=1 SV=3	6.26834e+07	6.70304e+07	7.88883e+07	6.9534e+07	0.120625	5.47035e+07	5.34387e+07	5.75904e+07	5.52442e+07	0.0385202	0.794491	0.120953	0.0459173	-0.331896	4.44482
P10620	1	1	89.62	0.00630175	1.52704	Condition 2	Condition 1	Microsomal glutathione S-transferase 1 OS=Homo sapiens GN=MGST1 PE=1 SV=1	1.17833e+08	1.20522e+08	1.13318e+08	1.17224e+08	0.0310539	2.06372e+08	1.71738e+08	1.58909e+08	1.79006e+08	0.137156	1.52704	0.0430218	0.0461159	0.610737	4.43859
P0C0S8	2	2	71.64	0.0363631	1.32098	Condition 1	Condition 2	Histone H2A type 1 OS=Homo sapiens GN=HIST1H2AG PE=1 SV=2	4.08805e+07	3.05637e+07	3.595e+07	3.57981e+07	0.144143	2.71958e+07	2.5874e+07	2.82293e+07	2.70997e+07	0.0435644	0.757015	0.0994845	0.0465742	-0.401606	4.42433
Q13185	1	1	16.71	0.0671219	1.58904	Condition 1	Condition 2	Chromobox protein homolog 3 OS=Homo sapiens GN=CBX3 PE=1 SV=4	1.0098e+07	1.19277e+07	1.33021e+07	1.17759e+07	0.1365	5.10008e+06	7.87861e+06	9.25355e+06	7.41075e+06	0.285516	0.629312	0.731871	0.0466139	-0.668152	4.4231
Q76LX8	1	1	14.65	0.00433116	2.37761	Condition 1	Condition 2	A disintegrin and metalloproteinase with thrombospondin motifs 13 OS=Homo sapiens GN=ADAMTS13 PE=1 SV=1	6.31765e+06	9.55316e+06	9.81632e+06	8.56238e+06	0.227558	3.39471e+06	3.72596e+06	3.6831e+06	3.60126e+06	0.0500261	0.420591	0.0169536	0.0466816	-1.24951	4.421
Q8WXX0	1	1	14.27	0.0538005	1.34286	Condition 2	Condition 1	Dynein heavy chain 7, axonemal OS=Homo sapiens GN=DNAH7 PE=1 SV=2	7.85497e+08	9.22188e+08	1.09146e+09	9.3305e+08	0.164271	1.11346e+09	1.3101e+09	1.33532e+09	1.25296e+09	0.0969437	1.34286	0.771524	0.0471875	0.425313	4.40545
Q08209	1	1	13.43	0.0549054	1.36344	Condition 1	Condition 2	Serine/threonine-protein phosphatase 2B catalytic subunit alpha isoform OS=Homo sapiens GN=PPP3CA PE=1 SV=1	6.4695e+06	5.85998e+06	6.60408e+06	6.31119e+06	0.0628262	3.94353e+06	4.22512e+06	5.718e+06	4.62888e+06	0.206022	0.73344	0.294784	0.0477646	-0.447248	4.38792
P98160	3	3	162.9	0.021172	1.31621	Condition 1	Condition 2	Basement membrane-specific heparan sulfate proteoglycan core protein OS=Homo sapiens GN=HSPG2 PE=1 SV=4	1.55487e+07	1.51812e+07	1.55347e+07	1.54215e+07	0.013505	1.30206e+07	1.00813e+07	1.2048e+07	1.17166e+07	0.127805	0.759759	0.0379535	0.0479549	-0.396387	4.38218
O76024	1	1	19.84	0.0550863	1.45255	Condition 2	Condition 1	Wolframin OS=Homo sapiens GN=WFS1 PE=1 SV=2	1.78395e+06	1.25442e+06	1.75819e+06	1.59886e+06	0.186737	2.66021e+06	2.30597e+06	2.00105e+06	2.32241e+06	0.142045	1.45255	0.900569	0.0479899	0.538584	4.38113
Q00577	1	1	39.12	0.041371	1.26667	Condition 2	Condition 1	Transcriptional activator protein Pur-alpha OS=Homo sapiens GN=PURA PE=1 SV=2	5.4144e+06	5.69315e+06	6.4183e+06	5.84195e+06	0.0887078	6.97023e+06	6.89888e+06	8.3303e+06	7.3998e+06	0.109006	1.26667	0.584328	0.0481024	0.341037	4.37775
Q9GZZ9	1	1	32.51	0.00661335	1.51968	Condition 1	Condition 2	Ubiquitin-like modifier-activating enzyme 5 OS=Homo sapiens GN=UBA5 PE=1 SV=1	4.7111e+06	4.06315e+06	3.58713e+06	4.12046e+06	0.136921	2.69548e+06	2.77265e+06	2.66605e+06	2.71139e+06	0.0203041	0.658031	0.0188641	0.0482882	-0.603772	4.37219
P02724	1	1	118.6	0.0439684	1.24058	Condition 2	Condition 1	Glycophorin-A OS=Homo sapiens GN=GYPA PE=1 SV=2	7.90067e+07	6.6512e+07	6.94901e+07	7.16696e+07	0.09106	9.85456e+07	8.50162e+07	8.31744e+07	8.89121e+07	0.094403	1.24058	0.753545	0.0483709	0.311018	4.36972
P04844	7	7	398.03	0.0472812	1.27563	Condition 1	Condition 2	Dolichyl-diphosphooligosaccharide--protein glycosyltransferase subunit 2 OS=Homo sapiens GN=RPN2 PE=1 SV=3	1.72831e+08	1.51165e+08	1.4624e+08	1.56745e+08	0.0902508	1.40577e+08	1.12525e+08	1.15529e+08	1.22877e+08	0.125346	0.783928	0.915159	0.0485606	-0.351208	4.36407
P25786	3	3	112.37	0.049906	1.14434	Condition 1	Condition 2	Proteasome subunit alpha type-1 OS=Homo sapiens GN=PSMA1 PE=1 SV=1	8.30595e+07	8.13988e+07	8.77128e+07	8.4057e+07	0.0389384	7.00949e+07	7.02658e+07	8.00039e+07	7.34549e+07	0.0772218	0.873869	0.499573	0.0486099	-0.194511	4.36261
P14550	4	4	398.97	0.00663155	1.46603	Condition 1	Condition 2	Alcohol dehydrogenase [NADP(+)] OS=Homo sapiens GN=AKR1A1 PE=1 SV=3	1.04651e+08	1.09192e+08	1.32254e+08	1.15365e+08	0.128296	7.81709e+07	7.74271e+07	8.04796e+07	7.86925e+07	0.0202269	0.682115	0.0228656	0.0487644	-0.551913	4.35803
Q15075	6	6	434.92	0.0639454	1.26534	Condition 2	Condition 1	Early endosome antigen 1 OS=Homo sapiens GN=EEA1 PE=1 SV=2	2.83821e+07	3.54214e+07	3.85835e+07	3.4129e+07	0.15301	4.47282e+07	4.08762e+07	4.39498e+07	4.31847e+07	0.0471651	1.26534	0.264086	0.0488967	0.339525	4.35412
P14543	5	5	221.12	0.0186918	1.21799	Condition 2	Condition 1	Nidogen-1 OS=Homo sapiens GN=NID1 PE=1 SV=3	6.2605e+07	6.82679e+07	7.49074e+07	6.85934e+07	0.0897706	8.27381e+07	8.32635e+07	8.46359e+07	8.35458e+07	0.0117289	1.21799	0.0493965	0.0489942	0.284497	4.35125
P01009	17	17	1551.44	0.0569843	1.18524	Condition 2	Condition 1	Alpha-1-antitrypsin OS=Homo sapiens GN=SERPINA1 PE=1 SV=3	5.45763e+09	6.10806e+09	6.78405e+09	6.11658e+09	0.108436	7.32046e+09	6.99167e+09	7.43667e+09	7.2496e+09	0.0318371	1.18524	0.216034	0.0490885	0.245176	4.34847
Q96R05	1	1	89.85	0.107173	2.21748	Condition 1	Condition 2	Retinoid-binding protein 7 OS=Homo sapiens GN=RBP7 PE=1 SV=1	5.99364e+06	7.97706e+06	5.13087e+06	6.36719e+06	0.229207	3.987e+06	3.59096e+06	1.03612e+06	2.87136e+06	0.557802	0.450962	0.90726	0.0490917	-1.14892	4.34838
P36955	8	8	508.63	0.0462132	1.18967	Condition 2	Condition 1	Pigment epithelium-derived factor OS=Homo sapiens GN=SERPINF1 PE=1 SV=4	1.50358e+08	1.33423e+08	1.44294e+08	1.42692e+08	0.0601333	1.85165e+08	1.56238e+08	1.67867e+08	1.69757e+08	0.0857448	1.18967	0.515773	0.0501053	0.250566	4.31889
P46776	1	1	21.85	0.041302	1.56418	Condition 1	Condition 2	60S ribosomal protein L27a OS=Homo sapiens GN=RPL27A PE=1 SV=2	1.33167e+07	1.2766e+07	1.783e+07	1.46376e+07	0.189813	7.79786e+06	8.96469e+06	1.13115e+07	9.358e+06	0.191229	0.639314	0.586417	0.0504854	-0.645404	4.30799
O14841	2	2	185.16	0.0343043	1.5407	Condition 1	Condition 2	5-oxoprolinase OS=Homo sapiens GN=OPLAH PE=1 SV=3	1.17564e+07	1.40333e+07	1.77759e+07	1.45218e+07	0.209292	8.64346e+06	9.10646e+06	1.05265e+07	9.42549e+06	0.104105	0.649056	0.188786	0.050649	-0.623586	4.30332
P02748	3	3	251.9	0.0537486	1.27749	Condition 2	Condition 1	Complement component C9 OS=Homo sapiens GN=C9 PE=1 SV=2	7.85733e+07	6.35238e+07	6.0743e+07	6.76133e+07	0.141879	9.17694e+07	7.86795e+07	8.86778e+07	8.63756e+07	0.079211	1.27749	0.674348	0.0509536	0.353316	4.29467
Q9Y696	4	4	341.9	0.0469756	1.25631	Condition 1	Condition 2	Chloride intracellular channel protein 4 OS=Homo sapiens GN=CLIC4 PE=1 SV=4	1.3915e+08	1.1775e+08	1.48018e+08	1.34973e+08	0.115288	1.15624e+08	1.06e+08	1.00683e+08	1.07436e+08	0.0704943	0.795982	0.383042	0.0510589	-0.329192	4.29169
P21912	2	2	127.9	0.0477991	1.21918	Condition 1	Condition 2	Succinate dehydrogenase [ubiquinone] iron-sulfur subunit, mitochondrial OS=Homo sapiens GN=SDHB PE=1 SV=3	3.05407e+07	3.20144e+07	3.61121e+07	3.28891e+07	0.0877752	2.96795e+07	2.59251e+07	2.53242e+07	2.69763e+07	0.0874946	0.82022	0.801295	0.0515627	-0.285917	4.27753
Q13421	1	1	31.54	0.0535505	1.07962	Condition 1	Condition 2	Mesothelin OS=Homo sapiens GN=MSLN PE=1 SV=2	6.10569e+06	6.04065e+06	6.20163e+06	6.11599e+06	0.0132414	5.46649e+06	5.55227e+06	5.97615e+06	5.66497e+06	0.0481706	0.926256	0.161887	0.0516715	-0.110517	4.27449
Q9UNZ2	4	4	260.17	0.0419398	1.2856	Condition 1	Condition 2	NSFL1 cofactor p47 OS=Homo sapiens GN=NSFL1C PE=1 SV=2	5.12567e+07	5.88358e+07	6.71846e+07	5.90924e+07	0.134824	4.85803e+07	4.40688e+07	4.52452e+07	4.59648e+07	0.0509132	0.777846	0.158855	0.0519982	-0.362443	4.26539
P61769	1	1	21.18	0.0441939	1.3112	Condition 1	Condition 2	Beta-2-microglobulin OS=Homo sapiens GN=B2M PE=1 SV=1	1.73914e+06	2.31709e+06	2.047e+06	2.03441e+06	0.142145	1.43429e+06	1.60312e+06	1.61728e+06	1.55156e+06	0.0656182	0.76266	0.220562	0.0525575	-0.390888	4.24996
B9A064	5	3	520.54	0.0626598	1.28429	Condition 2	Condition 1	Immunoglobulin lambda-like polypeptide 5 OS=Homo sapiens GN=IGLL5 PE=2 SV=2	7.87661e+07	1.01845e+08	1.00875e+08	9.38285e+07	0.13912	1.23423e+08	1.29569e+08	1.08519e+08	1.20503e+08	0.0898255	1.28429	0.814902	0.0527359	0.360976	4.24507
P13693	2	2	228.85	0.0457207	1.26083	Condition 1	Condition 2	Translationally-controlled tumor protein OS=Homo sapiens GN=TPT1 PE=1 SV=1	8.63457e+07	9.04235e+07	1.06354e+08	9.43743e+07	0.112033	7.33219e+07	6.92391e+07	8.19914e+07	7.48508e+07	0.087002	0.793127	0.550055	0.0528114	-0.334377	4.24301
P07738	2	2	78.96	0.0579543	1.28521	Condition 2	Condition 1	Bisphosphoglycerate mutase OS=Homo sapiens GN=BPGM PE=1 SV=2	6.37328e+07	4.79804e+07	5.63994e+07	5.60375e+07	0.140664	7.88586e+07	6.61224e+07	7.10785e+07	7.20198e+07	0.0891434	1.28521	0.797624	0.0528249	0.362	4.24264
P01859	8	3	750.07	0.0550507	1.49864	Condition 2	Condition 1	Ig gamma-2 chain C region OS=Homo sapiens GN=IGHG2 PE=1 SV=2	1.53881e+08	1.51153e+08	2.22141e+08	1.75725e+08	0.228882	2.18616e+08	2.87293e+08	2.84137e+08	2.63348e+08	0.147227	1.49864	0.963341	0.0531689	0.583653	4.23327
Q9H0E2	1	1	47.21	0.0555658	1.24021	Condition 1	Condition 2	Toll-interacting protein OS=Homo sapiens GN=TOLLIP PE=1 SV=1	5.58363e+06	6.18219e+06	6.51397e+06	6.09326e+06	0.0773808	4.42947e+06	4.74234e+06	5.56741e+06	4.91307e+06	0.119654	0.806313	0.782924	0.0533978	-0.310589	4.22708
P15153	1	1	63.46	0.0572822	1.10534	Condition 1	Condition 2	Ras-related C3 botulinum toxin substrate 2 OS=Homo sapiens GN=RAC2 PE=1 SV=1	4.58451e+07	4.34066e+07	4.47344e+07	4.4662e+07	0.0273349	4.28795e+07	3.80087e+07	4.03286e+07	4.04056e+07	0.060297	0.904697	0.4014	0.0537949	-0.144494	4.21639
Q15836	1	1	78.17	0.0551625	1.26617	Condition 1	Condition 2	Vesicle-associated membrane protein 3 OS=Homo sapiens GN=VAMP3 PE=1 SV=3	4.6119e+07	3.97771e+07	4.17844e+07	4.25602e+07	0.0761599	3.9068e+07	3.10549e+07	3.0717e+07	3.36133e+07	0.140626	0.789783	0.639664	0.0538855	-0.340473	4.21396
P05388	3	3	270.09	0.0539678	1.1074	Condition 1	Condition 2	60S acidic ribosomal protein P0 OS=Homo sapiens GN=RPLP0 PE=1 SV=1	1.10081e+08	1.05416e+08	1.15798e+08	1.10432e+08	0.0470853	1.00275e+08	9.49655e+07	1.03925e+08	9.97218e+07	0.0451785	0.903016	0.857621	0.0543029	-0.147177	4.20283
P09211	8	8	881.19	0.0444309	1.16255	Condition 1	Condition 2	Glutathione S-transferase P OS=Homo sapiens GN=GSTP1 PE=1 SV=2	1.40865e+09	1.39044e+09	1.62198e+09	1.47369e+09	0.0873629	1.30331e+09	1.25284e+09	1.24675e+09	1.26763e+09	0.0244931	0.860175	0.109923	0.0543806	-0.217298	4.20076
P68402	1	1	47.25	0.0495514	2.15793	Condition 1	Condition 2	Platelet-activating factor acetylhydrolase IB subunit beta OS=Homo sapiens GN=PAFAH1B2 PE=1 SV=1	673893	1.13764e+06	1.31916e+06	1.04356e+06	0.31887	326237	580017	544528	483594	0.284176	0.463406	0.291411	0.0544323	-1.10965	4.19939
Q02952	26	26	1869.78	0.011406	1.20217	Condition 1	Condition 2	A-kinase anchor protein 12 OS=Homo sapiens GN=AKAP12 PE=1 SV=4	8.90662e+08	9.54999e+08	1.02689e+09	9.57517e+08	0.0711721	7.99786e+08	7.92777e+08	7.96907e+08	7.9649e+08	0.00442363	0.831829	0.00533184	0.0544795	-0.265641	4.19814
Q9GZT8	1	1	34.38	0.0393909	1.33984	Condition 1	Condition 2	NIF3-like protein 1 OS=Homo sapiens GN=NIF3L1 PE=1 SV=2	3.56959e+06	2.81682e+06	2.71064e+06	3.03235e+06	0.154429	2.44688e+06	2.19721e+06	2.14554e+06	2.26321e+06	0.0712043	0.746355	0.211772	0.0546573	-0.422066	4.19344
Q8WUM4	7	7	445.65	0.0514482	1.17726	Condition 1	Condition 2	Programmed cell death 6-interacting protein OS=Homo sapiens GN=PDCD6IP PE=1 SV=1	1.14369e+08	1.22937e+08	1.34903e+08	1.2407e+08	0.0831302	1.10047e+08	9.83408e+07	1.07777e+08	1.05388e+08	0.0589045	0.849428	0.531862	0.0547764	-0.235437	4.1903
Q01813	2	1	122.61	0.0542854	1.48882	Condition 1	Condition 2	6-phosphofructokinase type C OS=Homo sapiens GN=PFKP PE=1 SV=2	834594	613736	839994	762775	0.16925	621982	477490	437529	512334	0.189403	0.671671	0.722027	0.0548921	-0.574172	4.18726
P12429	8	8	661.33	0.0521294	1.18919	Condition 2	Condition 1	Annexin A3 OS=Homo sapiens GN=ANXA3 PE=1 SV=3	2.65848e+08	3.09321e+08	2.89924e+08	2.88364e+08	0.0755235	3.7479e+08	3.25355e+08	3.28613e+08	3.42919e+08	0.0806279	1.18919	0.765759	0.0549566	0.249977	4.18556
P20774	7	7	508.86	0.0529782	1.17419	Condition 1	Condition 2	Mimecan OS=Homo sapiens GN=OGN PE=1 SV=1	1.02233e+09	1.16664e+09	1.20665e+09	1.13187e+09	0.08566	9.70612e+08	1.0088e+09	9.12475e+08	9.63962e+08	0.050318	0.851653	0.400351	0.0550789	-0.231662	4.18236
P27105	5	5	287.85	0.0457376	1.59259	Condition 2	Condition 1	Erythrocyte band 7 integral membrane protein OS=Homo sapiens GN=STOM PE=1 SV=3	5.3453e+07	6.0945e+07	5.31728e+07	5.58569e+07	0.0789275	1.03895e+08	9.82474e+07	6.47295e+07	8.89572e+07	0.23799	1.59259	0.083124	0.0569133	0.671375	4.13509
P31943	3	2	285.05	0.0500067	1.68418	Condition 1	Condition 2	Heterogeneous nuclear ribonucleoprotein H OS=Homo sapiens GN=HNRNPH1 PE=1 SV=4	6.03759e+07	8.63666e+07	9.98038e+07	8.21821e+07	0.2439	5.19151e+07	5.54249e+07	3.90491e+07	4.87964e+07	0.176691	0.593759	0.312267	0.0569736	-0.75205	4.13356
P28331	8	8	398.76	0.056424	1.13464	Condition 1	Condition 2	NADH-ubiquinone oxidoreductase 75 kDa subunit, mitochondrial OS=Homo sapiens GN=NDUFS1 PE=1 SV=3	8.51042e+07	7.45664e+07	8.37559e+07	8.11422e+07	0.0706724	7.41516e+07	6.87549e+07	7.16334e+07	7.15133e+07	0.0377605	0.881333	0.362998	0.0581146	-0.182241	4.10496
O43294	2	2	114.94	0.00712548	2.22776	Condition 1	Condition 2	Transforming growth factor beta-1-induced transcript 1 protein OS=Homo sapiens GN=TGFB1I1 PE=1 SV=2	2.5276e+06	3.48431e+06	4.19995e+06	3.40395e+06	0.246497	1.40513e+06	1.61185e+06	1.56694e+06	1.52797e+06	0.0711613	0.448882	0.0330312	0.0584433	-1.15559	4.09682
P48735	7	6	545.39	0.00743621	1.74794	Condition 1	Condition 2	Isocitrate dehydrogenase [NADP], mitochondrial OS=Homo sapiens GN=IDH2 PE=1 SV=2	9.79787e+07	1.08095e+08	1.40233e+08	1.15436e+08	0.191127	6.31914e+07	6.70828e+07	6.7849e+07	6.60411e+07	0.0378162	0.572103	0.0253025	0.0588073	-0.805654	4.08786
Q5SSJ5	2	2	38.22	0.050841	1.59525	Condition 1	Condition 2	Heterochromatin protein 1-binding protein 3 OS=Homo sapiens GN=HP1BP3 PE=1 SV=1	9.80931e+06	1.23585e+07	1.50157e+07	1.23945e+07	0.210042	6.62393e+06	7.05876e+06	9.62619e+06	7.76963e+06	0.208821	0.626862	0.559492	0.0593352	-0.67378	4.07497
P49821	3	3	109.54	0.0138663	1.25246	Condition 1	Condition 2	NADH dehydrogenase [ubiquinone] flavoprotein 1, mitochondrial OS=Homo sapiens GN=NDUFV1 PE=1 SV=4	1.49636e+07	1.7637e+07	1.74422e+07	1.66809e+07	0.08935	1.32766e+07	1.34047e+07	1.32741e+07	1.33185e+07	0.00560648	0.798427	0.00500729	0.0593454	-0.324768	4.07472
P05198	1	1	23.27	0.0582225	1.17215	Condition 1	Condition 2	Eukaryotic translation initiation factor 2 subunit 1 OS=Homo sapiens GN=EIF2S1 PE=1 SV=3	1.04684e+07	8.93242e+06	9.85583e+06	9.7522e+06	0.0792838	8.88421e+06	8.30029e+06	7.77523e+06	8.31991e+06	0.0666769	0.853131	0.679668	0.0596108	-0.229161	4.06828
Q9NX08	1	1	58.54	0.0676693	1.26047	Condition 1	Condition 2	COMM domain-containing protein 8 OS=Homo sapiens GN=COMMD8 PE=1 SV=1	2.7426e+06	2.91003e+06	3.20107e+06	2.95123e+06	0.0786101	2.66055e+06	2.36895e+06	1.99461e+06	2.34137e+06	0.142577	0.793353	0.651362	0.0601488	-0.333965	4.05532
Q9Y262	3	3	240.58	0.063742	1.23773	Condition 1	Condition 2	Eukaryotic translation initiation factor 3 subunit L OS=Homo sapiens GN=EIF3L PE=1 SV=1	1.35962e+07	1.50411e+07	1.5475e+07	1.47041e+07	0.0668995	1.37065e+07	1.06749e+07	1.12584e+07	1.18799e+07	0.135397	0.807932	0.544403	0.0604029	-0.307694	4.04924
P46778	1	1	27.79	0.0107413	1.67358	Condition 1	Condition 2	60S ribosomal protein L21 OS=Homo sapiens GN=RPL21 PE=1 SV=2	5.49684e+06	6.14622e+06	4.2378e+06	5.29362e+06	0.183297	3.17677e+06	3.05741e+06	3.25496e+06	3.16304e+06	0.0314533	0.59752	0.0208071	0.0612706	-0.742941	4.02866
Q9BX66	13	13	895.32	0.0287368	1.25954	Condition 2	Condition 1	Sorbin and SH3 domain-containing protein 1 OS=Homo sapiens GN=SORBS1 PE=1 SV=3	3.03019e+08	3.44619e+08	3.85983e+08	3.4454e+08	0.120399	4.26937e+08	4.3515e+08	4.39801e+08	4.33962e+08	0.0150092	1.25954	0.0481225	0.0615685	0.332897	4.02166
Q15276	1	1	17.08	0.0797951	1.27406	Condition 1	Condition 2	Rab GTPase-binding effector protein 1 OS=Homo sapiens GN=RABEP1 PE=1 SV=2	2.25725e+06	2.27395e+06	2.52643e+06	2.35254e+06	0.0641086	1.98868e+06	1.4953e+06	2.05552e+06	1.8465e+06	0.165708	0.784894	0.390929	0.0620182	-0.349431	4.01117
P35580	13	7	803.19	0.00740222	1.84444	Condition 1	Condition 2	Myosin-10 OS=Homo sapiens GN=MYH10 PE=1 SV=3	7.96714e+07	8.25425e+07	1.14819e+08	9.23444e+07	0.211347	5.24957e+07	4.98232e+07	4.78803e+07	5.00664e+07	0.0462838	0.54217	0.0278027	0.0623476	-0.883183	4.00352
P06733	14	12	1013.74	0.0697071	1.28904	Condition 1	Condition 2	Alpha-enolase OS=Homo sapiens GN=ENO1 PE=1 SV=2	1.09043e+09	1.33562e+09	1.34673e+09	1.25759e+09	0.115198	1.02936e+09	1.06554e+09	8.31913e+08	9.75603e+08	0.128892	0.77577	0.859364	0.0635702	-0.366299	3.9755
Q02153	1	1	35.38	0.0381427	5.18438	Condition 1	Condition 2	Guanylate cyclase soluble subunit beta-1 OS=Homo sapiens GN=GUCY1B3 PE=1 SV=1	340302	120837	432881	298007	0.537786	93489.2	53037.5	25918.3	57481.6	0.591562	0.192887	0.0861576	0.0637864	-2.37417	3.97061
Q5W0B1	1	1	25.84	0.069105	1.32578	Condition 1	Condition 2	RING finger protein 219 OS=Homo sapiens GN=RNF219 PE=1 SV=1	4.20049e+06	3.7337e+06	4.14398e+06	4.02606e+06	0.063278	2.69736e+06	2.65597e+06	3.75693e+06	3.03675e+06	0.205495	0.754274	0.285712	0.0638323	-0.406839	3.96957
Q9BT78	3	3	89.37	0.0703143	1.25386	Condition 1	Condition 2	COP9 signalosome complex subunit 4 OS=Homo sapiens GN=COPS4 PE=1 SV=1	2.00511e+07	2.2202e+07	2.25973e+07	2.16168e+07	0.0633901	1.49542e+07	1.66207e+07	2.01457e+07	1.72402e+07	0.153746	0.797537	0.421792	0.0639471	-0.326377	3.96698
P02774	16	15	801.38	0.0702725	1.1512	Condition 2	Condition 1	Vitamin D-binding protein OS=Homo sapiens GN=GC PE=1 SV=1	5.46493e+08	6.08584e+08	6.51975e+08	6.02351e+08	0.0880159	7.10186e+08	6.56085e+08	7.14007e+08	6.93426e+08	0.0467171	1.1512	0.543719	0.0640512	0.203138	3.96463
Q12805	1	1	19.52	0.0615812	1.26555	Condition 1	Condition 2	EGF-containing fibulin-like extracellular matrix protein 1 OS=Homo sapiens GN=EFEMP1 PE=1 SV=2	9.90198e+06	8.38215e+06	1.06096e+07	9.63123e+06	0.11817	6.98344e+06	7.36523e+06	8.48234e+06	7.61034e+06	0.102352	0.790172	0.63798	0.0641163	-0.339761	3.96317
P53007	2	2	43.18	0.0696532	1.16246	Condition 1	Condition 2	Tricarboxylate transport protein, mitochondrial OS=Homo sapiens GN=SLC25A1 PE=1 SV=2	2.34364e+07	2.63497e+07	2.60453e+07	2.52771e+07	0.0633516	2.2526e+07	2.30245e+07	1.9683e+07	2.17445e+07	0.0829014	0.860243	0.882138	0.0641419	-0.217183	3.96259
Q8TE96	1	1	15.72	0.042731	1.78558	Condition 1	Condition 2	ATP-dependent RNA helicase DQX1 OS=Homo sapiens GN=DQX1 PE=2 SV=2	1.36573e+07	2.00086e+07	2.5247e+07	1.96376e+07	0.29554	1.17616e+07	9.77058e+06	1.14615e+07	1.09979e+07	0.0976027	0.560042	0.0661535	0.0642925	-0.836394	3.95921
P46926	2	2	212.23	0.0611713	1.24568	Condition 1	Condition 2	Glucosamine-6-phosphate isomerase 1 OS=Homo sapiens GN=GNPDA1 PE=1 SV=1	2.66857e+07	2.10457e+07	2.46116e+07	2.41144e+07	0.118298	2.1012e+07	1.7859e+07	1.92044e+07	1.93584e+07	0.0817288	0.802776	0.470479	0.0649915	-0.316931	3.9436
Q9Y2Q3	4	4	280.52	0.0794505	1.23248	Condition 1	Condition 2	Glutathione S-transferase kappa 1 OS=Homo sapiens GN=GSTK1 PE=1 SV=3	1.31568e+08	1.21872e+08	1.16031e+08	1.23157e+08	0.0637208	1.08236e+08	1.07666e+08	8.38775e+07	9.99263e+07	0.139118	0.811373	0.483331	0.0653207	-0.301563	3.93632
P63092	4	3	232.06	0.0592182	1.18624	Condition 1	Condition 2	Guanine nucleotide-binding protein G(s) subunit alpha isoforms short OS=Homo sapiens GN=GNAS PE=1 SV=1	8.12922e+07	9.23284e+07	1.00214e+08	9.12783e+07	0.104129	7.51909e+07	7.55942e+07	8.00577e+07	7.69476e+07	0.0351016	0.843	0.14944	0.0659143	-0.246396	3.92326
Q6ZQN5	1	1	32.99	0.0540388	1.52913	Condition 1	Condition 2	Forkhead box protein I2 OS=Homo sapiens GN=FOXI2 PE=2 SV=2	1.11385e+07	1.46467e+07	1.75461e+07	1.44438e+07	0.222146	1.0901e+07	9.03102e+06	8.40522e+06	9.44574e+06	0.137472	0.653967	0.281465	0.0666988	-0.612711	3.9062
Q9H0R4	2	2	52.59	0.0560485	1.35339	Condition 1	Condition 2	Haloacid dehalogenase-like hydrolase domain-containing protein 2 OS=Homo sapiens GN=HDHD2 PE=1 SV=1	6.53218e+06	6.67182e+06	8.5029e+06	7.23563e+06	0.151984	6.15291e+06	5.07753e+06	4.80852e+06	5.34632e+06	0.133056	0.738888	0.589993	0.0668718	-0.436573	3.90246
P52565	5	5	462.05	0.0660484	1.15641	Condition 1	Condition 2	Rho GDP-dissociation inhibitor 1 OS=Homo sapiens GN=ARHGDIA PE=1 SV=3	7.69447e+08	6.71671e+08	7.33957e+08	7.25025e+08	0.0682684	6.80853e+08	6.00402e+08	5.99635e+08	6.26963e+08	0.0744406	0.864747	0.941303	0.067006	-0.20965	3.89957
P29992	1	1	33	0.0660144	1.14193	Condition 1	Condition 2	Guanine nucleotide-binding protein subunit alpha-11 OS=Homo sapiens GN=GNA11 PE=1 SV=2	1.79994e+07	1.59848e+07	1.85803e+07	1.75215e+07	0.0777413	1.58074e+07	1.45841e+07	1.56397e+07	1.53437e+07	0.0432219	0.875707	0.383237	0.0674987	-0.19148	3.889
P04843	6	6	208.66	0.0640672	1.16163	Condition 1	Condition 2	Dolichyl-diphosphooligosaccharide--protein glycosyltransferase subunit 1 OS=Homo sapiens GN=RPN1 PE=1 SV=1	7.64564e+07	8.68201e+07	9.16367e+07	8.49711e+07	0.0912926	7.61512e+07	7.27397e+07	7.05532e+07	7.3148e+07	0.0385694	0.860858	0.233645	0.0681461	-0.216153	3.87523
P25398	3	2	183.66	0.0603137	1.35059	Condition 1	Condition 2	40S ribosomal protein S12 OS=Homo sapiens GN=RPS12 PE=1 SV=3	1.2364e+07	1.64019e+07	1.76269e+07	1.54643e+07	0.178079	1.17835e+07	1.17411e+07	1.08252e+07	1.145e+07	0.0472895	0.740415	0.074441	0.0684032	-0.433594	3.86979
P02760	6	6	295.77	0.0728201	1.24496	Condition 2	Condition 1	Protein AMBP OS=Homo sapiens GN=AMBP PE=1 SV=1	1.1238e+08	1.34183e+08	1.45018e+08	1.30527e+08	0.127353	1.79851e+08	1.53119e+08	1.54533e+08	1.62501e+08	0.0925686	1.24496	0.900421	0.0689264	0.3161	3.8588
Q96NU7	1	1	17.35	0.0629283	1.19597	Condition 2	Condition 1	Probable imidazolonepropionase OS=Homo sapiens GN=AMDHD1 PE=2 SV=2	9.88988e+06	1.00792e+07	1.14589e+07	1.0476e+07	0.0817565	1.16725e+07	1.20681e+07	1.38462e+07	1.25289e+07	0.0924098	1.19597	0.707367	0.0690167	0.258179	3.85691
P23634	6	6	390.32	0.0674857	1.21028	Condition 1	Condition 2	Plasma membrane calcium-transporting ATPase 4 OS=Homo sapiens GN=ATP2B4 PE=1 SV=2	1.61456e+08	1.75515e+08	1.95698e+08	1.77557e+08	0.0969399	1.58869e+08	1.48527e+08	1.32726e+08	1.46707e+08	0.0897426	0.826257	0.738241	0.0692664	-0.275338	3.8517
P25940	1	1	14.28	0.0623996	1.19707	Condition 2	Condition 1	Collagen alpha-3(V) chain OS=Homo sapiens GN=COL5A3 PE=1 SV=3	4.90899e+08	5.41882e+08	5.4679e+08	5.26524e+08	0.0587805	7.01327e+08	5.7063e+08	6.18901e+08	6.30286e+08	0.104854	1.19707	0.359727	0.0694856	0.259508	3.84714
O60493	3	3	129.23	0.0641058	1.29743	Condition 1	Condition 2	Sorting nexin-3 OS=Homo sapiens GN=SNX3 PE=1 SV=3	4.79726e+07	5.99388e+07	6.49771e+07	5.76295e+07	0.151559	4.53e+07	4.08625e+07	4.70924e+07	4.44183e+07	0.0722042	0.770756	0.237624	0.0697443	-0.375654	3.84178
P26639	1	1	19.96	0.062029	1.35045	Condition 1	Condition 2	Threonine--tRNA ligase, cytoplasmic OS=Homo sapiens GN=TARS PE=1 SV=3	2.74556e+06	3.61248e+06	3.91997e+06	3.426e+06	0.17776	2.36996e+06	2.65365e+06	2.5872e+06	2.53694e+06	0.0584848	0.740495	0.11206	0.0699397	-0.433438	3.83775
P30040	5	5	253.71	0.0796258	1.17169	Condition 1	Condition 2	Endoplasmic reticulum resident protein 29 OS=Homo sapiens GN=ERP29 PE=1 SV=4	1.58582e+08	1.46428e+08	1.53015e+08	1.52675e+08	0.0398517	1.44171e+08	1.15089e+08	1.31648e+08	1.30303e+08	0.111954	0.853465	0.296359	0.0703244	-0.228596	3.82983
P07358	1	1	81.53	0.0679554	1.23876	Condition 2	Condition 1	Complement component C8 beta chain OS=Homo sapiens GN=C8B PE=1 SV=3	8.4852e+06	8.37949e+06	1.02093e+07	9.02467e+06	0.113832	1.0053e+07	1.118e+07	1.23052e+07	1.11794e+07	0.100731	1.23876	0.908424	0.0705658	0.308896	3.82489
P40261	1	1	14.59	0.0645232	1.33079	Condition 1	Condition 2	Nicotinamide N-methyltransferase OS=Homo sapiens GN=NNMT PE=1 SV=1	8.58048e+06	6.14038e+06	7.96846e+06	7.56311e+06	0.167861	5.27038e+06	5.69729e+06	6.08178e+06	5.68315e+06	0.0714191	0.751431	0.18547	0.0709772	-0.412288	3.8165
Q96DB5	1	1	14.79	0.0650284	1.31665	Condition 1	Condition 2	Regulator of microtubule dynamics protein 1 OS=Homo sapiens GN=FAM82B PE=1 SV=1	2.33022e+06	2.3024e+06	2.89558e+06	2.5094e+06	0.133391	1.86133e+06	1.66445e+06	2.1919e+06	1.90589e+06	0.139847	0.759501	0.776033	0.0709805	-0.396877	3.81643
Q10589	1	1	21.75	0.0646116	1.28625	Condition 1	Condition 2	Bone marrow stromal antigen 2 OS=Homo sapiens GN=BST2 PE=1 SV=1	2.40777e+07	1.78653e+07	2.15935e+07	2.11788e+07	0.147643	1.7243e+07	1.50834e+07	1.70704e+07	1.64656e+07	0.072887	0.777456	0.25679	0.0714096	-0.363167	3.80774
P43003	1	1	88.92	0.055867	1.42439	Condition 1	Condition 2	Excitatory amino acid transporter 1 OS=Homo sapiens GN=SLC1A3 PE=1 SV=1	3.00542e+06	2.53973e+06	3.74981e+06	3.09832e+06	0.196999	1.98036e+06	2.44656e+06	2.09864e+06	2.17519e+06	0.111412	0.702054	0.272354	0.071616	-0.510346	3.80357
Q14494	2	2	32.39	0.0640421	1.25023	Condition 1	Condition 2	Nuclear factor erythroid 2-related factor 1 OS=Homo sapiens GN=NFE2L1 PE=1 SV=1	1.01385e+07	7.78248e+06	8.94614e+06	8.95571e+06	0.131542	7.389e+06	6.60288e+06	7.49784e+06	7.16324e+06	0.0681714	0.799851	0.293265	0.0716288	-0.322197	3.80332
Q13409	1	1	45.16	0.0874328	1.43295	Condition 1	Condition 2	Cytoplasmic dynein 1 intermediate chain 2 OS=Homo sapiens GN=DYNC1I2 PE=1 SV=3	7.40523e+06	7.41668e+06	5.73597e+06	6.85263e+06	0.141123	5.79176e+06	4.96909e+06	3.5857e+06	4.78219e+06	0.233124	0.697862	0.858748	0.0719903	-0.518986	3.79605
P82909	1	1	89.83	0.057157	3.0784	Condition 1	Condition 2	28S ribosomal protein S36, mitochondrial OS=Homo sapiens GN=MRPS36 PE=1 SV=2	3.53037e+06	8.04258e+06	1.01272e+07	7.23338e+06	0.466177	1.30763e+06	2.86916e+06	2.87236e+06	2.34972e+06	0.384079	0.324844	0.133682	0.0725106	-1.62218	3.78566
Q99497	6	6	377.15	0.0610643	1.16191	Condition 1	Condition 2	Protein DJ-1 OS=Homo sapiens GN=PARK7 PE=1 SV=2	6.47683e+08	6.58176e+08	7.68796e+08	6.91552e+08	0.0970298	5.7664e+08	6.08445e+08	6.00475e+08	5.95187e+08	0.0278045	0.860654	0.114674	0.0731523	-0.216495	3.77295
Q9C0C2	7	7	334.68	0.0638751	1.36788	Condition 1	Condition 2	182 kDa tankyrase-1-binding protein OS=Homo sapiens GN=TNKS1BP1 PE=1 SV=4	3.04061e+07	4.04379e+07	4.47472e+07	3.85304e+07	0.190976	2.67772e+07	2.86732e+07	2.90532e+07	2.81679e+07	0.0432856	0.731056	0.053444	0.073845	-0.451945	3.75936
O75781	2	2	189.08	0.0685333	1.28748	Condition 1	Condition 2	Paralemmin-1 OS=Homo sapiens GN=PALM PE=1 SV=2	2.01515e+07	2.16799e+07	2.57653e+07	2.25323e+07	0.128808	1.54313e+07	1.73192e+07	1.97526e+07	1.7501e+07	0.123787	0.776711	0.715619	0.0738641	-0.364551	3.75898
P06748	4	4	363.44	0.102548	1.68996	Condition 1	Condition 2	Nucleophosmin OS=Homo sapiens GN=NPM1 PE=1 SV=2	1.16642e+08	1.66037e+08	1.21493e+08	1.34724e+08	0.202088	9.59532e+07	9.6841e+07	4.63674e+07	7.97205e+07	0.362367	0.591731	0.940816	0.0743594	-0.756986	3.74934
P56134	1	1	33.4	0.0141706	1.5736	Condition 1	Condition 2	ATP synthase subunit f, mitochondrial OS=Homo sapiens GN=ATP5J2 PE=1 SV=3	1.45199e+07	1.15111e+07	1.01582e+07	1.20631e+07	0.185079	7.74326e+06	7.37939e+06	7.87512e+06	7.66593e+06	0.0334929	0.635486	0.0261053	0.0743783	-0.654067	3.74897
P49748	13	13	733.28	0.0687858	1.19062	Condition 1	Condition 2	Very long-chain specific acyl-CoA dehydrogenase, mitochondrial OS=Homo sapiens GN=ACADVL PE=1 SV=1	4.25268e+08	4.88755e+08	5.30253e+08	4.81426e+08	0.10983	4.18495e+08	3.84797e+08	4.09751e+08	4.04348e+08	0.043247	0.839896	0.197184	0.0745835	-0.251717	3.745
Q92597	4	4	255.96	0.0224236	1.27534	Condition 1	Condition 2	Protein NDRG1 OS=Homo sapiens GN=NDRG1 PE=1 SV=1	9.4207e+07	1.09244e+08	1.17673e+08	1.07041e+08	0.111051	8.55447e+07	8.3457e+07	8.27922e+07	8.39313e+07	0.0171123	0.784102	0.0287772	0.075961	-0.350888	3.7186
P13639	13	12	636.47	0.0764852	1.15039	Condition 1	Condition 2	Elongation factor 2 OS=Homo sapiens GN=EEF2 PE=1 SV=4	2.90428e+08	2.67245e+08	3.03064e+08	2.86912e+08	0.0633184	2.72515e+08	2.33759e+08	2.41938e+08	2.49404e+08	0.0819084	0.869269	0.883213	0.0762846	-0.202125	3.71246
P35754	1	1	56.88	0.109965	1.36783	Condition 2	Condition 1	Glutaredoxin-1 OS=Homo sapiens GN=GLRX PE=1 SV=2	1.31744e+07	2.02931e+07	2.21544e+07	1.85407e+07	0.255631	2.40504e+07	2.49892e+07	2.70417e+07	2.53604e+07	0.0603223	1.36783	0.188705	0.0766736	0.451886	3.70513
P34932	5	5	260.85	0.0807037	1.11694	Condition 1	Condition 2	Heat shock 70 kDa protein 4 OS=Homo sapiens GN=HSPA4 PE=1 SV=4	5.79995e+07	5.41444e+07	5.68787e+07	5.63409e+07	0.0351967	5.45479e+07	4.69402e+07	4.98384e+07	5.04422e+07	0.0761187	0.895303	0.421139	0.0773051	-0.159552	3.69329
P62136	3	3	95.51	0.0681966	1.21519	Condition 1	Condition 2	Serine/threonine-protein phosphatase PP1-alpha catalytic subunit OS=Homo sapiens GN=PPP1CA PE=1 SV=1	9.21348e+06	1.02154e+07	1.17076e+07	1.03788e+07	0.120925	8.18455e+06	8.31968e+06	9.11844e+06	8.54089e+06	0.0590943	0.822914	0.278416	0.0782325	-0.281187	3.67609
Q16822	3	3	228.97	0.00860847	2.62493	Condition 1	Condition 2	Phosphoenolpyruvate carboxykinase [GTP], mitochondrial OS=Homo sapiens GN=PCK2 PE=1 SV=3	3.60882e+07	4.96065e+07	6.92077e+07	5.16341e+07	0.322512	1.93905e+07	2.14331e+07	1.81885e+07	1.96707e+07	0.0833906	0.380963	0.0192196	0.0784131	-1.39228	3.67276
P18669	11	11	741.81	0.0789362	1.13423	Condition 1	Condition 2	Phosphoglycerate mutase 1 OS=Homo sapiens GN=PGAM1 PE=1 SV=2	7.69396e+08	7.7012e+08	8.54316e+08	7.97944e+08	0.0611834	7.47654e+08	7.13111e+08	6.49765e+08	7.0351e+08	0.0705682	0.881653	0.983255	0.078593	-0.181716	3.66945
P11940	2	2	83.46	0.0774143	1.17964	Condition 1	Condition 2	Polyadenylate-binding protein 1 OS=Homo sapiens GN=PABPC1 PE=1 SV=2	1.74011e+07	1.53757e+07	1.57304e+07	1.61691e+07	0.0668938	1.53905e+07	1.28288e+07	1.29011e+07	1.37068e+07	0.106411	0.847716	0.709607	0.0786295	-0.238347	3.66879
Q14847	5	5	256.17	0.0866029	1.17611	Condition 1	Condition 2	LIM and SH3 domain protein 1 OS=Homo sapiens GN=LASP1 PE=1 SV=2	8.69526e+07	8.83656e+07	9.73372e+07	9.08851e+07	0.0619697	8.37423e+07	8.01846e+07	6.7902e+07	7.72763e+07	0.107549	0.850263	0.629423	0.078702	-0.234018	3.66746
P46777	2	2	87.47	0.0711181	1.31977	Condition 1	Condition 2	60S ribosomal protein L5 OS=Homo sapiens GN=RPL5 PE=1 SV=3	3.51248e+07	4.99349e+07	4.55482e+07	4.3536e+07	0.174737	3.38984e+07	3.10224e+07	3.40416e+07	3.29875e+07	0.0516355	0.757706	0.0954803	0.079061	-0.40029	3.66089
P18464	4	2	263.93	0.0987451	1.34793	Condition 1	Condition 2	HLA class I histocompatibility antigen, B-51 alpha chain OS=Homo sapiens GN=HLA-B PE=1 SV=1	1.17033e+08	1.12289e+08	1.36039e+08	1.21787e+08	0.1032	9.70461e+07	6.83198e+07	1.05689e+08	9.03515e+07	0.216524	0.741879	0.584318	0.0792396	-0.430743	3.65763
Q9H4X1	1	1	14.06	0.0707981	2.76957	Condition 1	Condition 2	Regulator of cell cycle RGCC OS=Homo sapiens GN=RGCC PE=1 SV=1	425673	1.16733e+06	995705	862902	0.449939	315712	439022	179964	311566	0.415894	0.361067	0.200447	0.079982	-1.46966	3.64418
P01714	2	2	161.59	0.0209985	1.33133	Condition 2	Condition 1	Ig lambda chain V-III region SH OS=Homo sapiens PE=1 SV=1	7.75404e+07	7.46306e+07	7.38767e+07	7.53492e+07	0.0256765	1.15382e+08	9.54068e+07	9.01554e+07	1.00315e+08	0.132685	1.33133	0.0413813	0.0801699	0.41287	3.6408
P63172	1	1	114.27	0.079127	1.23794	Condition 1	Condition 2	Dynein light chain Tctex-type 1 OS=Homo sapiens GN=DYNLT1 PE=1 SV=1	1.05414e+07	1.14046e+07	1.30113e+07	1.16524e+07	0.107569	8.30698e+06	1.05012e+07	9.43012e+06	9.41278e+06	0.116568	0.807796	0.867675	0.0803703	-0.307938	3.63719
P19652	4	3	348.47	0.0789716	1.10219	Condition 2	Condition 1	Alpha-1-acid glycoprotein 2 OS=Homo sapiens GN=ORM2 PE=1 SV=2	1.31839e+08	1.32113e+08	1.42965e+08	1.35639e+08	0.0467854	1.50778e+08	1.40804e+08	1.56919e+08	1.495e+08	0.0544026	1.10219	0.75683	0.0804913	0.140375	3.63502
Q9H2G2	2	2	49.53	0.0232212	1.32489	Condition 1	Condition 2	STE20-like serine/threonine-protein kinase OS=Homo sapiens GN=SLK PE=1 SV=1	1.38566e+07	1.62482e+07	1.80161e+07	1.60403e+07	0.130145	1.2022e+07	1.19425e+07	1.23561e+07	1.21069e+07	0.0181291	0.754779	0.0218673	0.0808679	-0.405874	3.62829
Q15717	1	1	27.76	0.0642447	1.36987	Condition 1	Condition 2	ELAV-like protein 1 OS=Homo sapiens GN=ELAVL1 PE=1 SV=2	1.15516e+07	7.94536e+06	9.29623e+06	9.59773e+06	0.189829	7.73895e+06	6.50407e+06	6.77591e+06	7.00631e+06	0.092613	0.729996	0.225127	0.0810663	-0.454039	3.62475
Q9NRP0	1	1	17.97	0.0838048	1.26273	Condition 1	Condition 2	Oligosaccharyltransferase complex subunit OSTC OS=Homo sapiens GN=OSTC PE=1 SV=1	5.6254e+06	4.94362e+06	6.24187e+06	5.60363e+06	0.115888	3.81661e+06	4.96428e+06	4.53229e+06	4.43773e+06	0.130619	0.791938	0.886871	0.0811447	-0.336541	3.62336
Q13724	1	1	102.93	0.0834299	1.13487	Condition 1	Condition 2	Mannosyl-oligosaccharide glucosidase OS=Homo sapiens GN=MOGS PE=1 SV=5	4.16275e+06	4.42074e+06	4.43087e+06	4.33812e+06	0.0350286	3.67991e+06	3.56255e+06	4.22531e+06	3.82259e+06	0.0925205	0.881162	0.311682	0.0811622	-0.182521	3.62305
P07437	14	2	1459.89	0.0681393	1.28372	Condition 1	Condition 2	Tubulin beta chain OS=Homo sapiens GN=TUBB PE=1 SV=2	6.94953e+08	7.63115e+08	9.35139e+08	7.97735e+08	0.155163	6.45971e+08	5.67355e+08	6.50953e+08	6.21426e+08	0.0754615	0.778988	0.251027	0.0822948	-0.360327	3.60305
P06312	1	1	34.61	0.0863127	1.21958	Condition 2	Condition 1	Ig kappa chain V-IV region (Fragment) OS=Homo sapiens GN=IGKV4-1 PE=4 SV=1	947008	1.17894e+06	1.15316e+06	1.09304e+06	0.1163	1.23936e+06	1.27997e+06	1.47982e+06	1.33305e+06	0.0965607	1.21958	0.98749	0.0831301	0.286388	3.58849
Q9NVA2	7	5	383.74	0.0907002	1.24571	Condition 1	Condition 2	Septin-11 OS=Homo sapiens GN=SEPT11 PE=1 SV=3	1.49815e+08	1.50254e+08	1.73436e+08	1.57835e+08	0.0856125	1.28044e+08	1.06805e+08	1.45258e+08	1.26702e+08	0.152021	0.802753	0.659656	0.0836911	-0.316971	3.57878
P54725	2	2	53.51	0.11118	1.26883	Condition 1	Condition 2	UV excision repair protein RAD23 homolog A OS=Homo sapiens GN=RAD23A PE=1 SV=1	2.28261e+07	2.16887e+07	2.19594e+07	2.21581e+07	0.0268143	2.03559e+07	1.35462e+07	1.8488e+07	1.74634e+07	0.201482	0.788126	0.0554483	0.0849015	-0.343502	3.55807
Q13813	65	65	3952.72	0.0908793	1.12874	Condition 2	Condition 1	Spectrin alpha chain, non-erythrocytic 1 OS=Homo sapiens GN=SPTAN1 PE=1 SV=3	2.10348e+09	2.3045e+09	2.52217e+09	2.31005e+09	0.0906472	2.69812e+09	2.59572e+09	2.5285e+09	2.60744e+09	0.0327579	1.12874	0.285298	0.0850011	0.174713	3.55638
Q92599	3	1	68.57	0.0794266	1.76032	Condition 1	Condition 2	Septin-8 OS=Homo sapiens GN=SEPT8 PE=1 SV=4	2.58693e+06	1.40708e+06	2.58752e+06	2.19384e+06	0.310578	1.02806e+06	1.21121e+06	1.49956e+06	1.24628e+06	0.190728	0.568079	0.216998	0.0853183	-0.815835	3.551
P00736	2	2	71.37	0.0851227	1.22853	Condition 2	Condition 1	Complement C1r subcomponent OS=Homo sapiens GN=C1R PE=1 SV=2	1.24889e+07	1.03446e+07	9.6679e+06	1.08338e+07	0.135938	1.46108e+07	1.22927e+07	1.30255e+07	1.33097e+07	0.0890265	1.22853	0.785918	0.0858502	0.296938	3.54203
Q9H479	1	1	17.92	0.0857512	1.15274	Condition 1	Condition 2	Fructosamine-3-kinase OS=Homo sapiens GN=FN3K PE=1 SV=1	3.09137e+06	3.31321e+06	3.49347e+06	3.29935e+06	0.061045	2.72166e+06	2.69532e+06	3.16957e+06	2.86218e+06	0.0931219	0.8675	0.726948	0.0860556	-0.205065	3.53859
P02768	52	52	5056.17	0.0404153	1.11657	Condition 2	Condition 1	Serum albumin OS=Homo sapiens GN=ALB PE=1 SV=2	2.53471e+11	2.54729e+11	2.83877e+11	2.64025e+11	0.0651568	2.97422e+11	2.95025e+11	2.9196e+11	2.94802e+11	0.00928623	1.11657	0.0493969	0.0867661	0.159071	3.52672
Q00169	1	1	52.32	0.0913771	1.4208	Condition 1	Condition 2	Phosphatidylinositol transfer protein alpha isoform OS=Homo sapiens GN=PITPNA PE=1 SV=2	6.72874e+06	6.91425e+06	5.77447e+06	6.47249e+06	0.0944887	6.0943e+06	3.66802e+06	3.90427e+06	4.55553e+06	0.293673	0.70383	0.345707	0.086954	-0.506701	3.5236
P26373	4	4	157.57	0.0804559	1.15818	Condition 1	Condition 2	60S ribosomal protein L13 OS=Homo sapiens GN=RPL13 PE=1 SV=4	5.28268e+07	5.97221e+07	6.49602e+07	5.91697e+07	0.102849	5.25047e+07	5.01757e+07	5.05855e+07	5.10886e+07	0.0243373	0.863425	0.0801431	0.0873091	-0.211857	3.51772
Q9NX46	1	1	30.5	0.231831	2.11558	Condition 1	Condition 2	Poly(ADP-ribose) glycohydrolase ARH3 OS=Homo sapiens GN=ADPRHL2 PE=1 SV=1	1.89798e+06	1.98766e+06	1.48676e+06	1.7908e+06	0.14915	1.08927e+06	1.36724e+06	82928.8	846482	0.798251	0.472683	0.270275	0.087538	-1.08105	3.51395
P62913	1	1	45.88	0.0768542	1.23671	Condition 1	Condition 2	60S ribosomal protein L11 OS=Homo sapiens GN=RPL11 PE=1 SV=2	3.45425e+07	3.5054e+07	4.28541e+07	3.74835e+07	0.124269	2.89829e+07	2.82283e+07	3.37163e+07	3.03092e+07	0.0981441	0.8086	0.579363	0.087805	-0.306502	3.50955
P08185	1	1	23.51	0.0810277	1.19164	Condition 2	Condition 1	Corticosteroid-binding globulin OS=Homo sapiens GN=SERPINA6 PE=1 SV=1	1.11929e+07	1.1777e+07	1.32328e+07	1.20676e+07	0.0870522	1.37743e+07	1.33403e+07	1.60261e+07	1.43802e+07	0.100261	1.19164	0.693567	0.0880901	0.25295	3.50488
P15311	9	4	602.45	0.0847246	1.12098	Condition 1	Condition 2	Ezrin OS=Homo sapiens GN=EZR PE=1 SV=4	7.14124e+07	6.19361e+07	6.62437e+07	6.65307e+07	0.0713149	6.21424e+07	5.94778e+07	5.6431e+07	5.93504e+07	0.0481515	0.892075	0.532428	0.0880956	-0.164764	3.50479
Q99685	2	2	91.09	0.0937308	1.06297	Condition 1	Condition 2	Monoglyceride lipase OS=Homo sapiens GN=MGLL PE=1 SV=2	6.64683e+07	6.63165e+07	6.52082e+07	6.59977e+07	0.010423	5.88821e+07	6.27227e+07	6.46592e+07	6.2088e+07	0.0473578	0.940761	0.103784	0.0883784	-0.0881004	3.50016
O75347	3	3	109.13	0.0940653	1.26897	Condition 1	Condition 2	Tubulin-specific chaperone A OS=Homo sapiens GN=TBCA PE=1 SV=3	3.11603e+07	3.84358e+07	3.85242e+07	3.60401e+07	0.117265	3.25289e+07	2.42748e+07	2.83997e+07	2.84012e+07	0.145313	0.788043	0.976249	0.0886357	-0.343654	3.49597
P20674	1	1	30.38	0.0752846	1.29453	Condition 1	Condition 2	Cytochrome c oxidase subunit 5A, mitochondrial OS=Homo sapiens GN=COX5A PE=1 SV=2	4.75471e+07	3.71971e+07	3.67719e+07	4.05054e+07	0.150647	3.55718e+07	2.9026e+07	2.92712e+07	3.12897e+07	0.118583	0.772483	0.539877	0.0891055	-0.372426	3.48834
P17174	2	2	111.84	0.0848719	1.26215	Condition 1	Condition 2	Aspartate aminotransferase, cytoplasmic OS=Homo sapiens GN=GOT1 PE=1 SV=3	1.56661e+07	1.68156e+07	1.98131e+07	1.74316e+07	0.122826	1.21323e+07	1.35665e+07	1.57343e+07	1.3811e+07	0.131299	0.7923	0.835411	0.0891134	-0.335882	3.48821
P23284	9	8	452.05	0.0911864	1.14624	Condition 1	Condition 2	Peptidyl-prolyl cis-trans isomerase B OS=Homo sapiens GN=PPIB PE=1 SV=2	4.87789e+08	4.17861e+08	4.8198e+08	4.62543e+08	0.0838947	4.1184e+08	3.75974e+08	4.22774e+08	4.03529e+08	0.0606691	0.872414	0.569411	0.0898323	-0.196915	3.47662
P13489	6	6	476.75	0.0854695	1.10633	Condition 1	Condition 2	Ribonuclease inhibitor OS=Homo sapiens GN=RNH1 PE=1 SV=2	3.83471e+08	3.64588e+08	4.14906e+08	3.87655e+08	0.0655713	3.49719e+08	3.36803e+08	3.64666e+08	3.50396e+08	0.039795	0.903886	0.46263	0.0900187	-0.145787	3.47363
P62820	5	2	394.26	0.0366254	1.04003	Condition 1	Condition 2	Ras-related protein Rab-1A OS=Homo sapiens GN=RAB1A PE=1 SV=3	5.00679e+07	4.89772e+07	4.79314e+07	4.89922e+07	0.0218061	4.69854e+07	4.71537e+07	4.71809e+07	4.71067e+07	0.00224843	0.961515	0.0194669	0.0910033	-0.0566194	3.45794
P50416	1	1	40.17	0.0957991	1.21805	Condition 2	Condition 1	Carnitine O-palmitoyltransferase 1, liver isoform OS=Homo sapiens GN=CPT1A PE=1 SV=2	2.86249e+06	3.17095e+06	3.85685e+06	3.29676e+06	0.154388	3.85847e+06	4.29403e+06	3.8944e+06	4.01564e+06	0.0602068	1.21805	0.368188	0.0916574	0.284578	3.44761
Q5VT66	2	1	56.26	0.103774	1.43532	Condition 1	Condition 2	MOSC domain-containing protein 1, mitochondrial OS=Homo sapiens GN=MARC1 PE=1 SV=1	972369	1.27062e+06	1.26517e+06	1.16939e+06	0.145926	605948	794241	1.04398e+06	814723	0.269702	0.696709	0.752424	0.0918286	-0.521371	3.44491
P52943	3	3	283.08	0.0259829	1.78049	Condition 1	Condition 2	Cysteine-rich protein 2 OS=Homo sapiens GN=CRIP2 PE=1 SV=1	8.62281e+07	1.27395e+08	1.45116e+08	1.1958e+08	0.25265	6.35182e+07	6.5996e+07	7.19688e+07	6.7161e+07	0.0646819	0.561642	0.0405125	0.0922886	-0.832276	3.4377
P51649	2	2	74.51	0.0839479	1.3469	Condition 1	Condition 2	Succinate-semialdehyde dehydrogenase, mitochondrial OS=Homo sapiens GN=ALDH5A1 PE=1 SV=2	4.76273e+06	5.60182e+06	6.81529e+06	5.72661e+06	0.180204	4.53445e+06	3.64145e+06	4.57921e+06	4.2517e+06	0.124413	0.742446	0.416148	0.0923475	-0.429641	3.43678
Q6V0I7	1	1	21.62	0.0931147	1.21635	Condition 2	Condition 1	Protocadherin Fat 4 OS=Homo sapiens GN=FAT4 PE=1 SV=2	4.94249e+08	4.27227e+08	3.90816e+08	4.37431e+08	0.119941	5.40578e+08	4.75522e+08	5.80104e+08	5.32068e+08	0.0992502	1.21635	0.993508	0.0924489	0.282554	3.4352
P07195	11	10	836.8	0.093466	1.06791	Condition 2	Condition 1	L-lactate dehydrogenase B chain OS=Homo sapiens GN=LDHB PE=1 SV=2	2.30011e+09	2.29865e+09	2.50759e+09	2.36878e+09	0.0507484	2.57071e+09	2.49031e+09	2.5279e+09	2.52964e+09	0.0159023	1.06791	0.201408	0.0928684	0.0947874	3.42867
P28072	2	2	70.99	0.0933039	1.08767	Condition 1	Condition 2	Proteasome subunit beta type-6 OS=Homo sapiens GN=PSMB6 PE=1 SV=4	3.43237e+07	3.58346e+07	3.77231e+07	3.59604e+07	0.0473637	3.14421e+07	3.44831e+07	3.32605e+07	3.30619e+07	0.0462828	0.919395	0.893284	0.0934098	-0.121243	3.42028
P68032	16	8	1692.27	0.089165	1.21616	Condition 1	Condition 2	Actin, alpha cardiac muscle 1 OS=Homo sapiens GN=ACTC1 PE=1 SV=1	3.59775e+09	4.31504e+09	4.66145e+09	4.19141e+09	0.129435	3.6996e+09	3.38567e+09	3.25407e+09	3.44645e+09	0.0664172	0.822264	0.302242	0.0935529	-0.282327	3.41807
Q9UL25	2	1	66.08	0.109861	1.55758	Condition 1	Condition 2	Ras-related protein Rab-21 OS=Homo sapiens GN=RAB21 PE=1 SV=3	4.04472e+06	4.90824e+06	5.17052e+06	4.70782e+06	0.125122	4.33429e+06	2.75242e+06	1.98085e+06	3.02252e+06	0.396935	0.642021	0.388477	0.0943221	-0.639308	3.40626
Q15417	1	1	16.7	0.0547882	1.93365	Condition 1	Condition 2	Calponin-3 OS=Homo sapiens GN=CNN3 PE=1 SV=1	1.12485e+07	1.09102e+07	1.99454e+07	1.40347e+07	0.364926	7.03265e+06	9.0323e+06	5.70945e+06	7.25813e+06	0.230481	0.517157	0.192801	0.0949078	-0.951327	3.39733
P39059	2	2	96.32	0.104019	1.11479	Condition 1	Condition 2	Collagen alpha-1(XV) chain OS=Homo sapiens GN=COL15A1 PE=1 SV=2	1.08431e+07	1.01388e+07	1.09235e+07	1.06351e+07	0.0405943	1.00085e+07	8.66692e+06	9.94462e+06	9.54e+06	0.0793275	0.897027	0.491069	0.0950533	-0.156777	3.39512
Q5T7N2	1	1	13.33	0.0976331	1.22838	Condition 2	Condition 1	LINE-1 type transposase domain-containing protein 1 OS=Homo sapiens GN=L1TD1 PE=1 SV=1	4.40012e+08	4.79876e+08	5.88204e+08	5.02698e+08	0.15255	6.21535e+08	5.65758e+08	6.65219e+08	6.17504e+08	0.0807322	1.22838	0.594129	0.0953792	0.296758	3.39018
P11171	1	1	20.26	0.0996933	1.80111	Condition 2	Condition 1	Protein 4.1 OS=Homo sapiens GN=EPB41 PE=1 SV=4	915669	1.39027e+06	2.24437e+06	1.51677e+06	0.443918	2.14252e+06	2.54033e+06	3.51272e+06	2.73186e+06	0.258027	1.80111	0.954207	0.0969968	0.848883	3.36592
O95372	1	1	35.55	0.0725383	1.47398	Condition 1	Condition 2	Acyl-protein thioesterase 2 OS=Homo sapiens GN=LYPLA2 PE=1 SV=1	5.30482e+06	3.53093e+06	3.69116e+06	4.17564e+06	0.234976	2.48865e+06	3.33749e+06	2.67253e+06	2.83289e+06	0.157635	0.678433	0.343196	0.0971729	-0.559722	3.3633
Q53SF7	1	1	17.18	0.0886221	1.37853	Condition 1	Condition 2	Cordon-bleu protein-like 1 OS=Homo sapiens GN=COBLL1 PE=1 SV=2	2.48798e+06	1.70012e+06	2.02267e+06	2.07026e+06	0.191319	1.26675e+06	1.51928e+06	1.71934e+06	1.50179e+06	0.15102	0.725412	0.493847	0.0971862	-0.463128	3.36311
O43396	4	4	159.46	0.0983857	1.09423	Condition 1	Condition 2	Thioredoxin-like protein 1 OS=Homo sapiens GN=TXNL1 PE=1 SV=3	9.01229e+07	8.29274e+07	9.0065e+07	8.77051e+07	0.0471774	7.86274e+07	7.66587e+07	8.51716e+07	8.01526e+07	0.0556026	0.913888	0.925869	0.0978652	-0.129911	3.35306
O60613	1	1	155.82	0.0978353	1.1428	Condition 1	Condition 2	15 kDa selenoprotein OS=Homo sapiens GN=SEP15 PE=1 SV=3	6.68518e+06	5.93214e+06	6.18028e+06	6.26587e+06	0.0612437	5.3065e+06	5.09146e+06	6.05078e+06	5.48291e+06	0.0918132	0.875044	0.73506	0.0988204	-0.192572	3.33905
P01743	1	1	55.84	0.107679	1.20472	Condition 2	Condition 1	Ig heavy chain V-I region HG3 OS=Homo sapiens PE=4 SV=1	6.77077e+07	8.06282e+07	9.01124e+07	7.94827e+07	0.141492	9.17163e+07	1.03708e+08	9.18404e+07	9.57547e+07	0.0719299	1.20472	0.545542	0.0994079	0.268702	3.3305
Q15661	2	2	139.12	0.0983759	1.14061	Condition 1	Condition 2	Tryptase alpha/beta-1 OS=Homo sapiens GN=TPSAB1 PE=1 SV=1	1.02467e+08	9.13401e+07	9.07922e+07	9.48665e+07	0.0694448	9.02143e+07	7.65589e+07	8.27415e+07	8.31716e+07	0.082214	0.876722	0.962789	0.0998346	-0.189808	3.32432
P51148	5	3	293.12	0.143517	1.38786	Condition 1	Condition 2	Ras-related protein Rab-5C OS=Homo sapiens GN=RAB5C PE=1 SV=2	3.92094e+07	4.26537e+07	3.6985e+07	3.9616e+07	0.072095	3.28399e+07	3.41053e+07	1.8689e+07	2.85448e+07	0.299835	0.720535	0.200405	0.100738	-0.472859	3.31132
Q8IUA7	1	1	26.08	0.102225	1.20123	Condition 2	Condition 1	ATP-binding cassette sub-family A member 9 OS=Homo sapiens GN=ABCA9 PE=1 SV=1	7.94341e+06	9.82851e+06	9.48036e+06	9.08409e+06	0.110422	1.03572e+07	1.01885e+07	1.21906e+07	1.09121e+07	0.101763	1.20123	0.898658	0.101818	0.264513	3.29593
Q9NPG1	1	1	33.15	0.0842029	1.69325	Condition 2	Condition 1	Frizzled-3 OS=Homo sapiens GN=FZD3 PE=1 SV=1	1.69821e+08	1.69824e+08	2.52379e+08	1.97341e+08	0.241529	3.29737e+08	4.38423e+08	2.34282e+08	3.34147e+08	0.305678	1.69325	0.357635	0.103391	0.759792	3.27382
O60664	5	5	186.33	0.0980783	1.17081	Condition 1	Condition 2	Perilipin-3 OS=Homo sapiens GN=PLIN3 PE=1 SV=3	7.15573e+07	6.14822e+07	7.77133e+07	7.0251e+07	0.116639	6.22714e+07	5.95007e+07	5.82336e+07	6.00019e+07	0.0344165	0.854108	0.119441	0.103565	-0.22751	3.27139
Q8NBF2	1	1	14.94	0.141217	1.3648	Condition 1	Condition 2	NHL repeat-containing protein 2 OS=Homo sapiens GN=NHLRC2 PE=1 SV=1	3.07084e+06	2.88582e+06	3.14735e+06	3.03467e+06	0.0443102	2.39131e+06	1.50021e+06	2.77904e+06	2.22352e+06	0.294902	0.732706	0.0807113	0.103778	-0.448694	3.26842
Q99704	1	1	18.42	0.115551	1.62346	Condition 2	Condition 1	Docking protein 1 OS=Homo sapiens GN=DOK1 PE=1 SV=1	5.6837e+07	7.52857e+07	1.46025e+08	9.2716e+07	0.507784	1.53353e+08	1.57317e+08	1.40892e+08	1.50521e+08	0.0569399	1.62346	0.064155	0.104566	0.699073	3.25752
Q9Y512	1	1	14.23	0.164753	1.6559	Condition 1	Condition 2	Sorting and assembly machinery component 50 homolog OS=Homo sapiens GN=SAMM50 PE=1 SV=3	1.66595e+06	2.19779e+06	1.65465e+06	1.83946e+06	0.168729	1.38626e+06	1.43352e+06	512781	1.11085e+06	0.466744	0.603901	0.52761	0.105019	-0.727616	3.25127
P54727	3	3	171.91	0.0983991	1.36002	Condition 1	Condition 2	UV excision repair protein RAD23 homolog B OS=Homo sapiens GN=RAD23B PE=1 SV=1	3.46095e+07	4.75517e+07	5.3655e+07	4.52721e+07	0.214818	3.11126e+07	3.32166e+07	3.5534e+07	3.32877e+07	0.0664369	0.735282	0.098337	0.105873	-0.443631	3.23959
P47756	6	6	346.48	0.105834	1.09828	Condition 1	Condition 2	F-actin-capping protein subunit beta OS=Homo sapiens GN=CAPZB PE=1 SV=4	1.80878e+08	1.59799e+08	1.81301e+08	1.73993e+08	0.0706578	1.5993e+08	1.53785e+08	1.61552e+08	1.58422e+08	0.0258632	0.910511	0.199941	0.105888	-0.135252	3.23939
P11233	2	2	115.64	0.126572	1.23137	Condition 2	Condition 1	Ras-related protein Ral-A OS=Homo sapiens GN=RALA PE=1 SV=1	2.81389e+07	3.64494e+07	4.12324e+07	3.52735e+07	0.187831	4.27237e+07	4.24012e+07	4.51797e+07	4.34349e+07	0.0349871	1.23137	0.0999597	0.106075	0.300268	3.23685
P01772	1	1	13.43	0.0615007	1.69146	Condition 2	Condition 1	Ig heavy chain V-III region KOL OS=Homo sapiens PE=1 SV=1	1.05692e+07	1.27717e+07	1.30652e+07	1.21354e+07	0.112421	2.84344e+07	1.6283e+07	1.6862e+07	2.05265e+07	0.33394	1.69146	0.0762065	0.106081	0.75827	3.23677
Q6NUM9	3	3	170.88	0.102199	1.22311	Condition 2	Condition 1	All-trans-retinol 13,14-reductase OS=Homo sapiens GN=RETSAT PE=2 SV=2	1.27825e+08	1.29668e+08	1.39105e+08	1.32199e+08	0.0457724	1.81464e+08	1.3522e+08	1.68399e+08	1.61694e+08	0.147436	1.22311	0.121055	0.106372	0.290556	3.2328
P00167	4	4	327.77	0.105717	1.14455	Condition 1	Condition 2	Cytochrome b5 OS=Homo sapiens GN=CYB5A PE=1 SV=2	1.91867e+09	1.90759e+09	2.15357e+09	1.99328e+09	0.0696974	1.7227e+09	1.59388e+09	1.90805e+09	1.74154e+09	0.0906852	0.873709	0.872475	0.10688	-0.194775	3.22594
O15230	1	1	17.55	0.112316	1.10772	Condition 2	Condition 1	Laminin subunit alpha-5 OS=Homo sapiens GN=LAMA5 PE=1 SV=8	2.98392e+08	3.01411e+08	2.66494e+08	2.88766e+08	0.0669983	3.25971e+08	3.00268e+08	3.33374e+08	3.19871e+08	0.0543207	1.10772	0.892953	0.107007	0.147592	3.22423
Q14012	1	1	22.33	0.0311451	3.75204	Condition 1	Condition 2	Calcium/calmodulin-dependent protein kinase type 1 OS=Homo sapiens GN=CAMK1 PE=1 SV=1	419756	368792	1.02787e+06	605474	0.605634	109478	227253	147386	161372	0.372558	0.266521	0.052353	0.107226	-1.90768	3.22128
Q14444	1	1	17.08	0.138733	1.52023	Condition 1	Condition 2	Caprin-1 OS=Homo sapiens GN=CAPRIN1 PE=1 SV=2	5.81379e+06	7.23158e+06	5.12617e+06	6.05718e+06	0.177244	4.38638e+06	5.12471e+06	2.44204e+06	3.98438e+06	0.347804	0.657794	0.750157	0.109935	-0.604293	3.18527
Q15436	2	2	101.93	0.105979	1.24303	Condition 1	Condition 2	Protein transport protein Sec23A OS=Homo sapiens GN=SEC23A PE=1 SV=2	2.36223e+07	3.02751e+07	3.27273e+07	2.88749e+07	0.16316	2.40606e+07	2.31458e+07	2.24817e+07	2.32294e+07	0.0341268	0.804483	0.0550685	0.110093	-0.313866	3.1832
Q9NVD7;Q9HBI1	5	5	510.09	0.112897	1.07428	Condition 1	Condition 2	Alpha-parvin OS=Homo sapiens GN=PARVA PE=1 SV=1	3.00706e+08	3.11177e+08	3.10919e+08	3.07601e+08	0.0194157	3.04966e+08	2.82506e+08	2.71522e+08	2.86331e+08	0.0595363	0.930853	0.218642	0.111001	-0.103375	3.17135
P14324	1	1	13.8	0.108642	1.39527	Condition 1	Condition 2	Farnesyl pyrophosphate synthase OS=Homo sapiens GN=FDPS PE=1 SV=4	4.382e+06	6.49171e+06	6.94957e+06	5.94109e+06	0.230511	3.92985e+06	4.7171e+06	4.12713e+06	4.25803e+06	0.0962001	0.716707	0.164236	0.111022	-0.480544	3.17108
P19367	2	1	72	0.154174	1.39324	Condition 1	Condition 2	Hexokinase-1 OS=Homo sapiens GN=HK1 PE=1 SV=3	1.03687e+07	8.8366e+06	1.0386e+07	9.86378e+06	0.0901893	8.48086e+06	4.55473e+06	8.20362e+06	7.07974e+06	0.30949	0.717751	0.28303	0.111057	-0.478445	3.17063
P04040	21	21	1396.77	0.112791	1.06042	Condition 2	Condition 1	Catalase OS=Homo sapiens GN=CAT PE=1 SV=3	2.15452e+09	2.22285e+09	2.36586e+09	2.24774e+09	0.0479777	2.35424e+09	2.43137e+09	2.36507e+09	2.38356e+09	0.0175193	1.06042	0.260776	0.111684	0.0846393	3.16251
P09668	1	1	19.2	0.118566	1.30946	Condition 1	Condition 2	Pro-cathepsin H OS=Homo sapiens GN=CTSH PE=1 SV=4	5.91744e+06	5.03112e+06	4.56319e+06	5.17058e+06	0.133024	4.69577e+06	3.13422e+06	4.01589e+06	3.94863e+06	0.198283	0.763671	0.871175	0.112101	-0.388976	3.15713
P05787	18	15	1313.85	0.0410172	1.25382	Condition 1	Condition 2	Keratin, type II cytoskeletal 8 OS=Homo sapiens GN=KRT8 PE=1 SV=7	9.25306e+08	1.03085e+09	1.19469e+09	1.05028e+09	0.129239	8.38737e+08	8.29664e+08	8.44592e+08	8.37664e+08	0.00897933	0.797562	0.00612251	0.112797	-0.326331	3.1482
P68371	14	3	1494.32	0.110043	1.1001	Condition 1	Condition 2	Tubulin beta-4B chain OS=Homo sapiens GN=TUBB4B PE=1 SV=1	8.27263e+08	7.30133e+08	7.61295e+08	7.72897e+08	0.064166	7.31343e+08	6.6496e+08	7.11411e+08	7.02571e+08	0.0484831	0.90901	0.64107	0.11291	-0.137631	3.14676
Q16543	2	2	187.74	0.10942	1.14981	Condition 1	Condition 2	Hsp90 co-chaperone Cdc37 OS=Homo sapiens GN=CDC37 PE=1 SV=1	1.08396e+08	1.2887e+08	1.16181e+08	1.17815e+08	0.0877162	1.11732e+08	9.95651e+07	9.60979e+07	1.02465e+08	0.0801316	0.869709	0.77394	0.114231	-0.201395	3.12997
O75306	1	1	15.58	0.109001	1.3049	Condition 1	Condition 2	NADH dehydrogenase [ubiquinone] iron-sulfur protein 2, mitochondrial OS=Homo sapiens GN=NDUFS2 PE=1 SV=2	6.09571e+06	5.89543e+06	7.40941e+06	6.46685e+06	0.127172	4.25271e+06	4.50197e+06	6.11273e+06	4.95581e+06	0.20373	0.76634	0.797702	0.114822	-0.383944	3.12253
Q99584	2	2	103.79	0.116861	1.28432	Condition 1	Condition 2	Protein S100-A13 OS=Homo sapiens GN=S100A13 PE=1 SV=1	2.56929e+07	3.33518e+07	3.65682e+07	3.18709e+07	0.175295	2.19066e+07	2.62192e+07	2.63203e+07	2.48154e+07	0.101534	0.77862	0.33803	0.116915	-0.361008	3.09646
Q15847	1	1	175.96	0.119431	1.10666	Condition 2	Condition 1	Adipose most abundant gene transcript 2 protein OS=Homo sapiens GN=APM2 PE=1 SV=1	4.54648e+07	4.9954e+07	5.23543e+07	4.92577e+07	0.0709967	5.20436e+07	5.37311e+07	5.776e+07	5.45116e+07	0.0538787	1.10666	0.827198	0.117102	0.146212	3.09417
P47985	1	1	146.36	0.108492	1.30435	Condition 1	Condition 2	Cytochrome b-c1 complex subunit Rieske, mitochondrial OS=Homo sapiens GN=UQCRFS1 PE=1 SV=2	1.85017e+07	2.3016e+07	2.73237e+07	2.29472e+07	0.192241	1.84294e+07	1.58181e+07	1.85309e+07	1.75928e+07	0.0874084	0.766664	0.216695	0.118104	-0.383333	3.08187
P35813	1	1	32.84	0.137353	1.51322	Condition 1	Condition 2	Protein phosphatase 1A OS=Homo sapiens GN=PPM1A PE=1 SV=1	4.51161e+06	6.58395e+06	6.33018e+06	5.80858e+06	0.194601	3.86302e+06	5.12607e+06	2.52661e+06	3.83857e+06	0.338642	0.660844	0.861144	0.118694	-0.597618	3.07468
Q92890	1	1	17.19	0.094423	1.37148	Condition 1	Condition 2	Ubiquitin fusion degradation protein 1 homolog OS=Homo sapiens GN=UFD1L PE=1 SV=3	1.12447e+06	1.28049e+06	1.73763e+06	1.38086e+06	0.230772	1.07445e+06	913068	1.03301e+06	1.00685e+06	0.0832454	0.729141	0.129407	0.120714	-0.455729	3.05033
O75182	1	1	13.66	0.150495	1.40225	Condition 2	Condition 1	Paired amphipathic helix protein Sin3b OS=Homo sapiens GN=SIN3B PE=1 SV=2	4.11585e+06	6.67911e+06	7.93027e+06	6.24175e+06	0.311525	8.04501e+06	9.9971e+06	8.21533e+06	8.75248e+06	0.123534	1.40225	0.472349	0.122308	0.487742	3.0314
Q63HR2	3	2	113.59	0.13342	1.65362	Condition 1	Condition 2	Tensin-like C1 domain-containing phosphatase OS=Homo sapiens GN=TENC1 PE=1 SV=2	1.4004e+07	1.01686e+07	1.82617e+07	1.41448e+07	0.28621	5.32e+06	1.07742e+07	9.56716e+06	8.5538e+06	0.33492	0.604732	0.667353	0.122593	-0.725631	3.02805
Q7L211	1	1	14.56	0.126843	1.3281	Condition 2	Condition 1	Abhydrolase domain-containing protein 13 OS=Homo sapiens GN=ABHD13 PE=1 SV=1	3.67659e+06	4.42629e+06	5.48172e+06	4.5282e+06	0.200272	6.24221e+06	6.83962e+06	4.95988e+06	6.0139e+06	0.159703	1.3281	0.942674	0.123224	0.409365	3.02064
P55072	25	25	2024.42	0.115862	1.10553	Condition 1	Condition 2	Transitional endoplasmic reticulum ATPase OS=Homo sapiens GN=VCP PE=1 SV=4	9.8261e+08	1.02888e+09	1.14069e+09	1.05073e+09	0.0773512	9.89917e+08	9.17307e+08	9.44061e+08	9.50428e+08	0.0386366	0.904543	0.339059	0.123255	-0.14474	3.02029
O60749	6	4	313.29	0.109614	1.18821	Condition 1	Condition 2	Sorting nexin-2 OS=Homo sapiens GN=SNX2 PE=1 SV=2	4.77322e+07	5.05975e+07	6.09882e+07	5.3106e+07	0.13134	4.44706e+07	4.20577e+07	4.75538e+07	4.4694e+07	0.0616381	0.8416	0.269892	0.123971	-0.248793	3.01193
P26196	1	1	35.58	0.127829	1.37071	Condition 1	Condition 2	Probable ATP-dependent RNA helicase DDX6 OS=Homo sapiens GN=DDX6 PE=1 SV=2	3.59089e+06	3.15653e+06	2.31455e+06	3.02066e+06	0.214831	1.81345e+06	2.42735e+06	2.37033e+06	2.20371e+06	0.15391	0.729546	0.429129	0.125459	-0.454929	2.99471
Q9Y678	3	3	201.28	0.122755	1.11702	Condition 1	Condition 2	Coatomer subunit gamma-1 OS=Homo sapiens GN=COPG1 PE=1 SV=1	2.39223e+07	2.13005e+07	2.56269e+07	2.36166e+07	0.0922808	2.06816e+07	2.15668e+07	2.1179e+07	2.11425e+07	0.0209868	0.895239	0.0796046	0.126285	-0.159655	2.98525
O75165	1	1	54.53	0.118903	1.64765	Condition 1	Condition 2	DnaJ homolog subfamily C member 13 OS=Homo sapiens GN=DNAJC13 PE=1 SV=5	179783	248250	311186	246406	0.266718	214943	125971	107736	149550	0.383559	0.606924	0.864783	0.126814	-0.720412	2.97922
P60866	2	2	64.3	0.0940309	1.28723	Condition 1	Condition 2	40S ribosomal protein S20 OS=Homo sapiens GN=RPS20 PE=1 SV=1	4.86179e+07	4.79866e+07	4.76072e+07	4.80706e+07	0.0106209	2.89087e+07	4.05068e+07	4.26175e+07	3.73443e+07	0.197656	0.776865	0.00952278	0.12752	-0.364264	2.9712
P11142	22	12	1316.29	0.124364	1.10175	Condition 1	Condition 2	Heat shock cognate 71 kDa protein OS=Homo sapiens GN=HSPA8 PE=1 SV=1	6.69661e+08	7.23398e+08	7.79716e+08	7.24258e+08	0.075985	6.73006e+08	6.28594e+08	6.7052e+08	6.57373e+08	0.0379617	0.90765	0.341107	0.127686	-0.139791	2.96933
P07108	2	2	140.15	0.0526185	1.69528	Condition 1	Condition 2	Acyl-CoA-binding protein OS=Homo sapiens GN=DBI PE=1 SV=2	1.30558e+08	2.04208e+08	2.36594e+08	1.90453e+08	0.285319	1.03802e+08	1.1539e+08	1.17837e+08	1.12343e+08	0.0667383	0.589873	0.0373634	0.127927	-0.761523	2.9666
P21266	7	7	347.18	0.122122	1.11747	Condition 1	Condition 2	Glutathione S-transferase Mu 3 OS=Homo sapiens GN=GSTM3 PE=1 SV=3	1.84571e+08	1.96813e+08	2.1907e+08	2.00151e+08	0.0873846	1.844e+08	1.70385e+08	1.82547e+08	1.79111e+08	0.0425051	0.894879	0.318579	0.128677	-0.160236	2.95818
P00387	8	8	620.93	0.131063	1.13055	Condition 2	Condition 1	NADH-cytochrome b5 reductase 3 OS=Homo sapiens GN=CYB5R3 PE=1 SV=3	6.59791e+08	6.08813e+08	6.93763e+08	6.54122e+08	0.0653671	7.93535e+08	6.67572e+08	7.57447e+08	7.39518e+08	0.0877156	1.13055	0.605783	0.12967	0.177025	2.94709
P16050	4	4	98.65	0.12818	1.07716	Condition 1	Condition 2	Arachidonate 15-lipoxygenase OS=Homo sapiens GN=ALOX15 PE=1 SV=3	3.07272e+07	3.03744e+07	3.3051e+07	3.13842e+07	0.0463356	3.07752e+07	2.79966e+07	2.86366e+07	2.91361e+07	0.0499415	0.92837	0.999384	0.131333	-0.107229	2.9287
Q9NZL9	1	1	36.65	0.118175	1.22554	Condition 1	Condition 2	Methionine adenosyltransferase 2 subunit beta OS=Homo sapiens GN=MAT2B PE=1 SV=1	2.82928e+06	3.19275e+06	3.84232e+06	3.28811e+06	0.15608	2.50815e+06	2.62646e+06	2.91436e+06	2.68299e+06	0.0778687	0.815966	0.284324	0.131517	-0.293419	2.92668
Q7KZF4	2	2	154.27	0.0776257	1.16661	Condition 1	Condition 2	Staphylococcal nuclease domain-containing protein 1 OS=Homo sapiens GN=SND1 PE=1 SV=1	2.0009e+07	2.02334e+07	2.0643e+07	2.02951e+07	0.0158408	1.63137e+07	1.60973e+07	1.9779e+07	1.73967e+07	0.118757	0.857184	0.0472855	0.132552	-0.222323	2.91537
P59998	1	1	42.12	0.171956	1.32411	Condition 2	Condition 1	Actin-related protein 2/3 complex subunit 4 OS=Homo sapiens GN=ARPC4 PE=1 SV=3	2.22715e+07	3.69172e+07	4.02039e+07	3.31309e+07	0.288159	4.10194e+07	4.46524e+07	4.59354e+07	4.38691e+07	0.0581253	1.32411	0.133175	0.132944	0.405028	2.91111
Q6XQN6	1	1	56.14	0.13161	1.1542	Condition 1	Condition 2	Nicotinate phosphoribosyltransferase OS=Homo sapiens GN=NAPRT1 PE=1 SV=2	1.68098e+07	1.33149e+07	1.56101e+07	1.52449e+07	0.116487	1.37155e+07	1.25393e+07	1.33698e+07	1.32082e+07	0.0457702	0.8664	0.20771	0.133201	-0.206895	2.90832
Q9NUM3	1	1	14.2	0.141163	1.31903	Condition 1	Condition 2	Zinc transporter ZIP9 OS=Homo sapiens GN=SLC39A9 PE=2 SV=2	1.91804e+06	1.71358e+06	1.98461e+06	1.87208e+06	0.075444	1.07153e+06	1.84597e+06	1.34037e+06	1.41929e+06	0.277047	0.758135	0.228549	0.133732	-0.399473	2.90259
P63010	5	1	111.22	0.166156	1.36347	Condition 1	Condition 2	AP-2 complex subunit beta OS=Homo sapiens GN=AP2B1 PE=1 SV=1	2.40495e+06	2.97041e+06	3.13446e+06	2.83661e+06	0.134921	2.45466e+06	2.37859e+06	1.40804e+06	2.08043e+06	0.280495	0.733422	0.601526	0.133775	-0.447284	2.90212
O14737	1	1	79.62	0.0532338	1.53072	Condition 1	Condition 2	Programmed cell death protein 5 OS=Homo sapiens GN=PDCD5 PE=1 SV=3	4.73678e+06	6.4881e+06	7.87008e+06	6.36499e+06	0.246705	4.30439e+06	4.05582e+06	4.11431e+06	4.15817e+06	0.0312543	0.653289	0.0136062	0.134396	-0.614208	2.89544
Q4KWH8	1	1	32.89	0.095268	1.21913	Condition 2	Condition 1	1-phosphatidylinositol 4,5-bisphosphate phosphodiesterase eta-1 OS=Homo sapiens GN=PLCH1 PE=1 SV=1	4.68587e+07	3.44355e+07	4.44052e+07	4.18998e+07	0.157033	5.08205e+07	5.08683e+07	5.15552e+07	5.10813e+07	0.00804828	1.21913	0.00777791	0.136352	0.285853	2.8746
Q93086	1	1	13.25	0.137486	1.16849	Condition 2	Condition 1	P2X purinoceptor 5 OS=Homo sapiens GN=P2RX5 PE=1 SV=4	8.97691e+06	1.00222e+07	9.88848e+06	9.62918e+06	0.0590726	1.16195e+07	9.70175e+06	1.24336e+07	1.12516e+07	0.124658	1.16849	0.282476	0.136929	0.224649	2.8685
P00846	1	1	27.75	0.0518919	1.9211	Condition 1	Condition 2	ATP synthase subunit a OS=Homo sapiens GN=MT-ATP6 PE=1 SV=1	3.51893e+06	5.98822e+06	7.37436e+06	5.62717e+06	0.34705	2.97628e+06	2.77869e+06	3.03243e+06	2.92913e+06	0.0455017	0.520534	0.00927219	0.138469	-0.941936	2.85236
Q00325	2	2	44.21	0.128915	1.12037	Condition 1	Condition 2	Phosphate carrier protein, mitochondrial OS=Homo sapiens GN=SLC25A3 PE=1 SV=2	8.46781e+07	8.31201e+07	9.72311e+07	8.83431e+07	0.0875741	7.60331e+07	7.66003e+07	8.39225e+07	7.8852e+07	0.0558058	0.892565	0.488866	0.13847	-0.163971	2.85236
O94927	1	1	13.64	0.137495	1.29452	Condition 2	Condition 1	HAUS augmin-like complex subunit 5 OS=Homo sapiens GN=HAUS5 PE=1 SV=2	1.49022e+08	1.19241e+08	1.7687e+08	1.48378e+08	0.194232	1.71045e+08	2.25412e+08	1.79777e+08	1.92078e+08	0.152001	1.29452	0.987027	0.138787	0.372417	2.84905
P62333	5	5	178.77	0.137798	1.0861	Condition 1	Condition 2	26S protease regulatory subunit 10B OS=Homo sapiens GN=PSMC6 PE=1 SV=1	5.35491e+07	5.01632e+07	4.85846e+07	5.07656e+07	0.0499643	4.58595e+07	4.44626e+07	4.9901e+07	4.6741e+07	0.0604253	0.920722	0.892911	0.140199	-0.119163	2.83445
Q9BUT1	2	2	85.33	0.141481	1.20294	Condition 1	Condition 2	3-hydroxybutyrate dehydrogenase type 2 OS=Homo sapiens GN=BDH2 PE=1 SV=2	1.74513e+07	2.16909e+07	2.33026e+07	2.08149e+07	0.145205	1.88696e+07	1.62213e+07	1.68192e+07	1.73034e+07	0.0802691	0.831296	0.348712	0.14147	-0.266566	2.82143
P25788	1	1	23.27	0.136707	1.13155	Condition 1	Condition 2	Proteasome subunit alpha type-3 OS=Homo sapiens GN=PSMA3 PE=1 SV=2	1.94042e+07	2.12262e+07	2.36376e+07	2.14227e+07	0.099127	1.97612e+07	1.77807e+07	1.92545e+07	1.89321e+07	0.0543435	0.883743	0.380209	0.141538	-0.178301	2.82074
P49368	9	9	452.89	0.141208	1.14229	Condition 1	Condition 2	T-complex protein 1 subunit gamma OS=Homo sapiens GN=CCT3 PE=1 SV=4	1.40844e+08	1.67111e+08	1.58485e+08	1.5548e+08	0.0861148	1.50184e+08	1.32171e+08	1.25984e+08	1.36113e+08	0.092366	0.875438	0.93713	0.14182	-0.191924	2.81787
Q9BTV4	5	5	148.85	0.153453	1.10887	Condition 1	Condition 2	Transmembrane protein 43 OS=Homo sapiens GN=TMEM43 PE=1 SV=1	4.50353e+07	4.5457e+07	4.25173e+07	4.43365e+07	0.0358521	4.15263e+07	4.27825e+07	3.56419e+07	3.99836e+07	0.095342	0.901819	0.296232	0.141974	-0.149089	2.8163
P26572	1	1	16.72	0.154674	1.27392	Condition 2	Condition 1	Alpha-1,3-mannosyl-glycoprotein 2-beta-N-acetylglucosaminyltransferase OS=Homo sapiens GN=MGAT1 PE=2 SV=2	5.92689e+06	8.0711e+06	8.43067e+06	7.47622e+06	0.181074	8.03747e+06	9.72923e+06	1.08057e+07	9.52411e+06	0.146517	1.27392	0.969672	0.142143	0.349276	2.81459
P0CW22	1	1	156.46	0.141163	1.09466	Condition 1	Condition 2	40S ribosomal protein S17-like OS=Homo sapiens GN=RPS17L PE=3 SV=1	2.26409e+07	1.99187e+07	2.08034e+07	2.1121e+07	0.065746	1.80926e+07	1.99289e+07	1.98624e+07	1.92946e+07	0.0539803	0.913528	0.720056	0.142478	-0.130479	2.81119
P28066	6	6	312.01	0.133678	1.14104	Condition 1	Condition 2	Proteasome subunit alpha type-5 OS=Homo sapiens GN=PSMA5 PE=1 SV=3	1.02201e+08	9.32184e+07	1.16859e+08	1.04093e+08	0.11464	8.79052e+07	9.29218e+07	9.28531e+07	9.12267e+07	0.0315339	0.876397	0.109845	0.143633	-0.190343	2.79954
Q13200	2	2	52.42	0.16865	1.36348	Condition 1	Condition 2	26S proteasome non-ATPase regulatory subunit 2 OS=Homo sapiens GN=PSMD2 PE=1 SV=3	7.11707e+06	9.46311e+06	7.51192e+06	8.0307e+06	0.156415	6.65833e+06	6.99487e+06	4.0163e+06	5.88983e+06	0.276956	0.733415	0.744482	0.146056	-0.447299	2.77541
P13671	2	2	184.44	0.0930807	1.11395	Condition 2	Condition 1	Complement component C6 OS=Homo sapiens GN=C6 PE=1 SV=3	1.86175e+07	2.11206e+07	2.20025e+07	2.05802e+07	0.0853238	2.29603e+07	2.29232e+07	2.28926e+07	2.29254e+07	0.00147857	1.11395	0.000744983	0.146764	0.155688	2.76843
Q92530	1	1	55.72	0.139951	1.05702	Condition 2	Condition 1	Proteasome inhibitor PI31 subunit OS=Homo sapiens GN=PSMF1 PE=1 SV=2	3.84643e+07	3.89098e+07	3.93928e+07	3.89223e+07	0.0119303	4.35444e+07	4.01263e+07	3.97539e+07	4.11415e+07	0.0507822	1.05702	0.0941476	0.146931	0.0799968	2.76679
P52735	1	1	15.47	0.164615	1.49075	Condition 1	Condition 2	Guanine nucleotide exchange factor VAV2 OS=Homo sapiens GN=VAV2 PE=1 SV=2	7.3856e+06	1.06627e+07	7.30496e+06	8.4511e+06	0.226688	6.94338e+06	6.55596e+06	3.50774e+06	5.66903e+06	0.331931	0.670804	0.982073	0.147187	-0.576038	2.76428
P10301	4	3	425.8	0.143314	1.11235	Condition 2	Condition 1	Ras-related protein R-Ras OS=Homo sapiens GN=RRAS PE=1 SV=1	7.30054e+07	7.80107e+07	8.44544e+07	7.84902e+07	0.073124	8.42506e+07	8.31362e+07	9.45386e+07	8.73085e+07	0.0719999	1.11235	0.909269	0.147207	0.15361	2.76408
P84157	1	1	102.38	0.155806	1.1524	Condition 2	Condition 1	Matrix-remodeling-associated protein 7 OS=Homo sapiens GN=MXRA7 PE=1 SV=1	6.16825e+07	7.15154e+07	8.16565e+07	7.16181e+07	0.139454	8.52026e+07	7.86059e+07	8.37895e+07	8.25327e+07	0.0420836	1.1524	0.215785	0.148328	0.20464	2.75314
Q6UXG3	1	1	34.35	0.0809786	1.58463	Condition 1	Condition 2	CMRF35-like molecule 9 OS=Homo sapiens GN=CD300LG PE=1 SV=2	1.66698e+07	2.83909e+07	2.90204e+07	2.46937e+07	0.281693	1.44426e+07	1.66208e+07	1.56863e+07	1.55832e+07	0.0701266	0.631061	0.0481721	0.148329	-0.664149	2.75313
O15145	2	2	214.69	0.155287	1.16219	Condition 1	Condition 2	Actin-related protein 2/3 complex subunit 3 OS=Homo sapiens GN=ARPC3 PE=1 SV=3	3.22973e+07	4.08432e+07	4.15191e+07	3.82199e+07	0.134491	3.27742e+07	3.3769e+07	3.21149e+07	3.2886e+07	0.0253207	0.860444	0.0511435	0.150707	-0.216847	2.73019
Q9UI12	1	1	48.86	0.177405	1.41994	Condition 2	Condition 1	V-type proton ATPase subunit H OS=Homo sapiens GN=ATP6V1H PE=1 SV=1	9.61657e+06	1.64296e+07	2.02179e+07	1.54214e+07	0.348355	1.89552e+07	2.11825e+07	2.55543e+07	2.18974e+07	0.15331	1.41994	0.561679	0.151324	0.505825	2.72428
P20618	3	2	145.9	0.149932	1.14785	Condition 2	Condition 1	Proteasome subunit beta type-1 OS=Homo sapiens GN=PSMB1 PE=1 SV=2	3.83848e+07	4.10392e+07	4.88697e+07	4.27646e+07	0.127471	4.61497e+07	5.2001e+07	4.91107e+07	4.90871e+07	0.0596021	1.14785	0.447268	0.151426	0.198928	2.72332
P00505	2	2	96.66	0.147769	1.14914	Condition 1	Condition 2	Aspartate aminotransferase, mitochondrial OS=Homo sapiens GN=GOT2 PE=1 SV=3	1.88831e+07	2.18744e+07	2.42412e+07	2.16663e+07	0.12393	1.87226e+07	1.83112e+07	1.95295e+07	1.88544e+07	0.0328703	0.870219	0.101158	0.151908	-0.20055	2.71873
P61313	1	1	14.39	0.171428	1.18179	Condition 2	Condition 1	60S ribosomal protein L15 OS=Homo sapiens GN=RPL15 PE=1 SV=2	2.73407e+06	3.5574e+06	3.8124e+06	3.36796e+06	0.167334	3.74706e+06	4.04558e+06	4.14801e+06	3.98022e+06	0.0523377	1.18179	0.24041	0.152332	0.240972	2.71471
P22061	2	2	89.65	0.161544	1.20004	Condition 1	Condition 2	Protein-L-isoaspartate(D-aspartate) O-methyltransferase OS=Homo sapiens GN=PCMT1 PE=1 SV=4	5.14469e+07	4.24591e+07	5.40846e+07	4.93302e+07	0.123554	3.51453e+07	4.29206e+07	4.52559e+07	4.11073e+07	0.128774	0.833309	0.85996	0.152457	-0.263077	2.71352
P30566	1	1	47.03	0.202933	1.47809	Condition 2	Condition 1	Adenylosuccinate lyase OS=Homo sapiens GN=ADSL PE=1 SV=2	1.10304e+06	2.43e+06	2.9906e+06	2.17455e+06	0.445778	3.56926e+06	2.92936e+06	3.14389e+06	3.21417e+06	0.101329	1.47809	0.202866	0.153063	0.563731	2.7078
Q14152	3	3	102.66	0.0871023	1.06911	Condition 1	Condition 2	Eukaryotic translation initiation factor 3 subunit A OS=Homo sapiens GN=EIF3A PE=1 SV=1	2.08423e+07	1.91443e+07	2.09462e+07	2.03109e+07	0.0498092	1.90699e+07	1.89687e+07	1.89556e+07	1.89981e+07	0.0032921	0.935361	0.0076148	0.153091	-0.0964041	2.70754
P62158	5	5	408.7	0.178549	1.21765	Condition 2	Condition 1	Calmodulin OS=Homo sapiens GN=CALM1 PE=1 SV=2	8.06984e+08	1.1215e+09	1.23261e+09	1.0537e+09	0.209513	1.32962e+09	1.23171e+09	1.28777e+09	1.28303e+09	0.0382891	1.21765	0.0943652	0.153869	0.2841	2.70022
P24928	1	1	15.1	0.170633	1.19136	Condition 2	Condition 1	DNA-directed RNA polymerase II subunit RPB1 OS=Homo sapiens GN=POLR2A PE=1 SV=2	1.54309e+08	2.01853e+08	2.13991e+08	1.90051e+08	0.165971	2.21852e+08	2.45546e+08	2.11863e+08	2.2642e+08	0.0764075	1.19136	0.462501	0.154838	0.252615	2.69117
P01625	1	1	172.76	0.174579	1.21538	Condition 2	Condition 1	Ig kappa chain V-IV region Len OS=Homo sapiens PE=1 SV=2	4.46799e+07	6.74978e+07	5.98123e+07	5.733e+07	0.202507	6.6017e+07	7.36983e+07	6.93179e+07	6.96777e+07	0.0553014	1.21538	0.198455	0.155311	0.281408	2.68677
Q8NE71	1	1	40.27	0.225254	1.61096	Condition 1	Condition 2	ATP-binding cassette sub-family F member 1 OS=Homo sapiens GN=ABCF1 PE=1 SV=2	5.68302e+06	6.87335e+06	6.15794e+06	6.2381e+06	0.0960552	4.4079e+06	5.83542e+06	1.37352e+06	3.87228e+06	0.588455	0.620747	0.129353	0.156989	-0.687923	2.67126
Q9Y2B0	2	2	94.8	0.057364	1.91121	Condition 1	Condition 2	Protein canopy homolog 2 OS=Homo sapiens GN=CNPY2 PE=1 SV=1	6.64323e+06	9.61409e+06	1.42501e+07	1.01691e+07	0.376993	4.81409e+06	5.24561e+06	5.90267e+06	5.32079e+06	0.103024	0.523229	0.0400711	0.15738	-0.934486	2.66767
Q13126	2	2	167.83	0.124786	1.44104	Condition 1	Condition 2	S-methyl-5'-thioadenosine phosphorylase OS=Homo sapiens GN=MTAP PE=1 SV=2	3.01433e+07	3.59842e+07	5.27315e+07	3.96197e+07	0.295931	2.65579e+07	3.08485e+07	2.50753e+07	2.74939e+07	0.109051	0.693945	0.122758	0.157673	-0.527106	2.66499
P14209	1	1	105.31	0.206191	1.5946	Condition 1	Condition 2	CD99 antigen OS=Homo sapiens GN=CD99 PE=1 SV=1	2.4042e+07	1.90525e+07	1.52084e+07	1.94343e+07	0.227904	1.61104e+07	1.48573e+07	5.59502e+06	1.21876e+07	0.471267	0.627118	0.745816	0.158583	-0.673191	2.65669
P61586	4	4	272.42	0.152228	1.07451	Condition 1	Condition 2	Transforming protein RhoA OS=Homo sapiens GN=RHOA PE=1 SV=1	1.18098e+08	1.22534e+08	1.33814e+08	1.24816e+08	0.0649165	1.15075e+08	1.19629e+08	1.13777e+08	1.1616e+08	0.0264564	0.930656	0.251529	0.158697	-0.103679	2.65565
Q9NX14	1	1	39.38	0.144217	1.14244	Condition 1	Condition 2	NADH dehydrogenase [ubiquinone] 1 beta subcomplex subunit 11, mitochondrial OS=Homo sapiens GN=NDUFB11 PE=1 SV=1	3.19421e+07	3.27393e+07	3.96538e+07	3.47784e+07	0.121944	3.02845e+07	2.95e+07	3.15422e+07	3.04423e+07	0.033841	0.875321	0.111437	0.16039	-0.192116	2.64034
P12109	9	9	686.38	0.16509	1.09059	Condition 1	Condition 2	Collagen alpha-1(VI) chain OS=Homo sapiens GN=COL6A1 PE=1 SV=3	1.51781e+08	1.59754e+08	1.66079e+08	1.59205e+08	0.0450024	1.56584e+08	1.47186e+08	1.34169e+08	1.4598e+08	0.0771048	0.916931	0.576682	0.161154	-0.125115	2.63349
Q02878	1	1	23.1	0.172446	1.42866	Condition 1	Condition 2	60S ribosomal protein L6 OS=Homo sapiens GN=RPL6 PE=1 SV=3	261094	439597	373151	357947	0.252041	185053	307540	259050	250548	0.246199	0.699957	0.63713	0.163951	-0.514661	2.60866
P62847	1	1	16.36	0.214166	1.69832	Condition 1	Condition 2	40S ribosomal protein S24 OS=Homo sapiens GN=RPS24 PE=1 SV=1	5.64819e+06	3.98961e+06	6.48745e+06	5.37508e+06	0.236484	3.47616e+06	4.84622e+06	1.17245e+06	3.16494e+06	0.586599	0.588817	0.638316	0.164093	-0.764108	2.60742
P61247	3	3	96.43	0.162423	1.26862	Condition 1	Condition 2	40S ribosomal protein S3a OS=Homo sapiens GN=RPS3A PE=1 SV=2	2.13121e+07	2.82128e+07	3.29013e+07	2.74754e+07	0.212179	2.09272e+07	2.11148e+07	2.2931e+07	2.16576e+07	0.0511018	0.788256	0.069575	0.164709	-0.343263	2.60201
O75915	2	2	295.88	0.0974057	1.15434	Condition 1	Condition 2	PRA1 family protein 3 OS=Homo sapiens GN=ARL6IP5 PE=1 SV=1	1.22329e+08	1.43718e+08	1.51488e+08	1.39178e+08	0.108498	1.20164e+08	1.22279e+08	1.19265e+08	1.20569e+08	0.0128359	0.866294	0.0207891	0.165078	-0.207072	2.59878
Q5JRC9	1	1	17.96	0.169352	1.10234	Condition 2	Condition 1	Protein FAM47A OS=Homo sapiens GN=FAM47A PE=1 SV=3	1.05938e+08	1.01656e+08	1.06616e+08	1.04736e+08	0.0256784	1.20583e+08	1.22526e+08	1.03256e+08	1.15455e+08	0.0918902	1.10234	0.120767	0.165082	0.140565	2.59874
Q969X5	1	1	14.55	0.177443	1.16899	Condition 2	Condition 1	Endoplasmic reticulum-Golgi intermediate compartment protein 1 OS=Homo sapiens GN=ERGIC1 PE=1 SV=1	5.25611e+06	6.27151e+06	6.60933e+06	6.04565e+06	0.1165	7.5469e+06	7.48912e+06	6.16591e+06	7.06731e+06	0.110533	1.16899	0.896803	0.167779	0.225264	2.57537
Q6ZNA1	1	1	16.16	0.168576	1.18944	Condition 1	Condition 2	Zinc finger protein 836 OS=Homo sapiens GN=ZNF836 PE=2 SV=2	1.12578e+07	1.38491e+07	1.49375e+07	1.33481e+07	0.141615	1.06492e+07	1.05225e+07	1.24949e+07	1.12222e+07	0.0983771	0.840731	0.508687	0.167841	-0.250284	2.57483
P36543	1	1	120.26	0.107522	1.22005	Condition 1	Condition 2	V-type proton ATPase subunit E 1 OS=Homo sapiens GN=ATP6V1E1 PE=1 SV=1	1.10947e+07	1.15381e+07	1.14892e+07	1.1374e+07	0.0213717	8.27345e+06	8.41959e+06	1.12746e+07	9.32256e+06	0.181509	0.819637	0.0404386	0.168154	-0.286942	2.57215
P49589	1	1	30.59	0.179193	1.35125	Condition 1	Condition 2	Cysteine--tRNA ligase, cytoplasmic OS=Homo sapiens GN=CARS PE=1 SV=3	7.80883e+06	4.57915e+06	7.07588e+06	6.48795e+06	0.260977	4.68177e+06	4.46914e+06	5.25339e+06	4.80143e+06	0.0844726	0.740054	0.108531	0.1687	-0.434298	2.56746
Q04760	3	3	154.36	0.170251	1.14432	Condition 1	Condition 2	Lactoylglutathione lyase OS=Homo sapiens GN=GLO1 PE=1 SV=4	5.77064e+07	6.67553e+07	7.28885e+07	6.57834e+07	0.116102	6.10148e+07	5.3252e+07	5.81933e+07	5.74867e+07	0.0683523	0.873878	0.418578	0.169625	-0.194496	2.55958
O14735	1	1	17.17	0.174733	1.11053	Condition 1	Condition 2	CDP-diacylglycerol--inositol 3-phosphatidyltransferase OS=Homo sapiens GN=CDIPT PE=1 SV=1	1.82993e+07	1.80025e+07	1.92874e+07	1.85297e+07	0.0363061	1.8446e+07	1.48693e+07	1.6741e+07	1.66854e+07	0.107219	0.900469	0.247781	0.169978	-0.151252	2.55658
Q9UHA4	1	1	37.07	0.181473	1.39815	Condition 1	Condition 2	Ragulator complex protein LAMTOR3 OS=Homo sapiens GN=LAMTOR3 PE=1 SV=1	1.09571e+07	7.05008e+06	9.4157e+06	9.14097e+06	0.215291	4.64565e+06	6.55812e+06	8.40988e+06	6.53788e+06	0.287891	0.715228	0.955469	0.173127	-0.483524	2.53009
Q4G0N4	1	1	53.59	0.17779	1.61468	Condition 1	Condition 2	NAD kinase domain-containing protein 1 OS=Homo sapiens GN=NADKD1 PE=1 SV=2	4.18132e+06	7.54391e+06	9.76126e+06	7.16216e+06	0.392268	4.85968e+06	4.58327e+06	3.86402e+06	4.43565e+06	0.115875	0.619317	0.0647696	0.173582	-0.691249	2.52631
Q9NX63	2	2	84.46	0.182976	1.08033	Condition 1	Condition 2	Coiled-coil-helix-coiled-coil-helix domain-containing protein 3, mitochondrial OS=Homo sapiens GN=CHCHD3 PE=1 SV=1	1.86232e+07	1.75007e+07	1.85208e+07	1.82149e+07	0.0340727	1.77262e+07	1.53909e+07	1.74642e+07	1.68604e+07	0.0758816	0.925639	0.380984	0.174322	-0.111479	2.52017
P62888	2	2	159.03	0.1748	1.20669	Condition 1	Condition 2	60S ribosomal protein L30 OS=Homo sapiens GN=RPL30 PE=1 SV=2	2.76202e+07	3.43477e+07	3.91625e+07	3.37101e+07	0.171982	2.5968e+07	2.95728e+07	2.82672e+07	2.7936e+07	0.0653311	0.828712	0.180332	0.175222	-0.271057	2.51275
Q15691	2	2	222.03	0.182284	1.15187	Condition 2	Condition 1	Microtubule-associated protein RP/EB family member 1 OS=Homo sapiens GN=MAPRE1 PE=1 SV=3	2.32102e+07	2.73979e+07	3.19096e+07	2.75059e+07	0.158173	3.23905e+07	3.16938e+07	3.09654e+07	3.16832e+07	0.0224914	1.15187	0.0522524	0.176108	0.203978	2.50547
P40123	2	2	111.25	0.176697	1.11284	Condition 1	Condition 2	Adenylyl cyclase-associated protein 2 OS=Homo sapiens GN=CAP2 PE=1 SV=1	1.18231e+07	1.32261e+07	1.4131e+07	1.30601e+07	0.0890425	1.25864e+07	1.10494e+07	1.15714e+07	1.17357e+07	0.0665987	0.898598	0.622322	0.176956	-0.154252	2.49854
Q53H82	1	1	15.86	0.207096	2.13501	Condition 1	Condition 2	Beta-lactamase-like protein 2 OS=Homo sapiens GN=LACTB2 PE=1 SV=2	110126	390697	308461	269761	0.534671	176296	123406	79351.6	126351	0.384163	0.468381	0.203466	0.177971	-1.09424	2.49029
O75131	3	3	90.76	0.187169	1.28241	Condition 1	Condition 2	Copine-3 OS=Homo sapiens GN=CPNE3 PE=1 SV=1	2.16598e+07	3.09239e+07	3.46615e+07	2.90817e+07	0.230169	2.16187e+07	2.23699e+07	2.40435e+07	2.26774e+07	0.0547372	0.779781	0.0664908	0.178562	-0.358859	2.4855
P07305	1	1	125.04	0.166223	1.31512	Condition 1	Condition 2	Histone H1.0 OS=Homo sapiens GN=H1F0 PE=1 SV=3	3.56068e+07	2.77422e+07	2.53509e+07	2.95666e+07	0.181483	2.86083e+07	2.02521e+07	1.85858e+07	2.24821e+07	0.238879	0.760387	0.999135	0.181327	-0.395195	2.46333
P04217	11	11	602.88	0.18253	1.03186	Condition 2	Condition 1	Alpha-1B-glycoprotein OS=Homo sapiens GN=A1BG PE=1 SV=4	4.8383e+08	4.74655e+08	4.93704e+08	4.84063e+08	0.0196801	4.84517e+08	5.03084e+08	5.10849e+08	4.99483e+08	0.0270878	1.03186	0.662881	0.181801	0.0452423	2.45956
Q99729	2	1	84.54	0.190321	1.78453	Condition 1	Condition 2	Heterogeneous nuclear ribonucleoprotein A/B OS=Homo sapiens GN=HNRNPAB PE=1 SV=2	258303	177797	326958	254353	0.293524	57942.8	243660	125994	142532	0.659195	0.560372	0.774063	0.181849	-0.835544	2.45919
P37840	3	3	125.19	0.198045	1.1911	Condition 2	Condition 1	Alpha-synuclein OS=Homo sapiens GN=SNCA PE=1 SV=1	4.96165e+07	6.62343e+07	6.08883e+07	5.89131e+07	0.143995	7.65592e+07	7.39119e+07	6.00431e+07	7.01714e+07	0.126415	1.1911	0.955361	0.187324	0.252296	2.4164
P62861	1	1	31.28	0.127735	1.1438	Condition 1	Condition 2	40S ribosomal protein S30 OS=Homo sapiens GN=FAU PE=1 SV=1	1.37552e+07	1.37176e+07	1.36671e+07	1.37133e+07	0.00322401	1.3584e+07	1.05591e+07	1.18245e+07	1.19892e+07	0.126714	0.874276	0.00169244	0.188161	-0.193839	2.40996
Q9H074	1	1	30.99	0.200951	1.3559	Condition 1	Condition 2	Polyadenylate-binding protein-interacting protein 1 OS=Homo sapiens GN=PAIP1 PE=1 SV=1	482484	795981	756898	678454	0.251802	475803	421734	603578	500371	0.186618	0.737517	0.460076	0.188301	-0.439253	2.40889
P42224	2	2	55.56	0.191524	1.32072	Condition 1	Condition 2	Signal transducer and activator of transcription 1-alpha/beta OS=Homo sapiens GN=STAT1 PE=1 SV=2	8.3091e+06	6.73798e+06	1.03791e+07	8.47541e+06	0.215478	6.79316e+06	7.50845e+06	4.95018e+06	6.41726e+06	0.205681	0.757162	0.686241	0.188804	-0.401325	2.40504
P60033	2	2	260.12	0.19224	1.09412	Condition 1	Condition 2	CD81 antigen OS=Homo sapiens GN=CD81 PE=1 SV=1	2.71504e+08	2.26519e+08	2.56316e+08	2.51446e+08	0.0910104	2.33874e+08	2.22558e+08	2.33019e+08	2.29817e+08	0.027418	0.91398	0.140946	0.189631	-0.129765	2.39874
P07814	1	1	69.04	0.156794	1.70277	Condition 1	Condition 2	Bifunctional glutamate/proline--tRNA ligase OS=Homo sapiens GN=EPRS PE=1 SV=5	3.46148e+06	3.24351e+06	6.46637e+06	4.39045e+06	0.410231	2.66636e+06	3.37613e+06	1.69275e+06	2.57841e+06	0.327772	0.587278	0.360896	0.189809	-0.767885	2.39738
P11182	1	1	27.76	0.126805	4.27092	Condition 1	Condition 2	Lipoamide acyltransferase component of branched-chain alpha-keto acid dehydrogenase complex, mitochondrial OS=Homo sapiens GN=DBT PE=1 SV=3	386753	2.18601e+06	2.57182e+06	1.71486e+06	0.680078	393352	337774	473433	401520	0.169848	0.234141	0.00681567	0.190018	-2.09455	2.39579
Q06124	1	1	28.31	0.19347	1.20201	Condition 2	Condition 1	Tyrosine-protein phosphatase non-receptor type 11 OS=Homo sapiens GN=PTPN11 PE=1 SV=2	5.289e+06	6.4288e+06	7.29352e+06	6.33711e+06	0.158653	7.47147e+06	6.7027e+06	8.6777e+06	7.61729e+06	0.130695	1.20201	0.990145	0.192149	0.265453	2.3797
P06753	6	1	274.93	0.175505	1.3534	Condition 1	Condition 2	Tropomyosin alpha-3 chain OS=Homo sapiens GN=TPM3 PE=1 SV=1	1.23578e+07	1.25261e+07	1.72451e+07	1.4043e+07	0.197564	8.01625e+06	9.42183e+06	1.36901e+07	1.03761e+07	0.284776	0.738878	0.937066	0.192183	-0.436592	2.37944
P53999	1	1	16.46	0.213166	1.24742	Condition 1	Condition 2	Activated RNA polymerase II transcriptional coactivator p15 OS=Homo sapiens GN=SUB1 PE=1 SV=3	7.99953e+06	8.5281e+06	9.58287e+06	8.7035e+06	0.0926191	7.42885e+06	5.0572e+06	8.4456e+06	6.97722e+06	0.249206	0.801657	0.353821	0.19375	-0.318943	2.36773
Q96S97	1	1	19.65	0.231886	1.29029	Condition 2	Condition 1	Myeloid-associated differentiation marker OS=Homo sapiens GN=MYADM PE=1 SV=2	6.86866e+06	1.23422e+07	1.31426e+07	1.07845e+07	0.316635	1.3241e+07	1.39187e+07	1.45856e+07	1.39151e+07	0.0483156	1.29029	0.0746351	0.194229	0.367692	2.36417
Q9Y6W5	1	1	23.52	0.218119	1.30778	Condition 1	Condition 2	Wiskott-Aldrich syndrome protein family member 2 OS=Homo sapiens GN=WASF2 PE=1 SV=3	2.90994e+06	4.66761e+06	4.81675e+06	4.13143e+06	0.256683	3.27129e+06	3.29203e+06	2.91401e+06	3.15911e+06	0.0672724	0.764652	0.0772213	0.194434	-0.387124	2.36265
P18206	31	31	2351.02	0.13095	1.07364	Condition 1	Condition 2	Vinculin OS=Homo sapiens GN=VCL PE=1 SV=4	1.91969e+09	2.02967e+09	2.17637e+09	2.04191e+09	0.0630681	1.90583e+09	1.91961e+09	1.88015e+09	1.90186e+09	0.0105319	0.931415	0.0472422	0.197899	-0.102504	2.33717
O14818	3	3	211.7	0.19956	1.0899	Condition 1	Condition 2	Proteasome subunit alpha type-7 OS=Homo sapiens GN=PSMA7 PE=1 SV=1	1.08359e+08	9.27881e+07	1.00723e+08	1.00623e+08	0.0773757	9.70495e+07	8.67723e+07	9.31486e+07	9.23235e+07	0.056194	0.917516	0.614973	0.199217	-0.124195	2.32759
Q9UQ80	2	2	62.55	0.135836	1.14614	Condition 1	Condition 2	Proliferation-associated protein 2G4 OS=Homo sapiens GN=PA2G4 PE=1 SV=3	2.37972e+07	2.45353e+07	2.43826e+07	2.42384e+07	0.016074	2.43897e+07	2.00298e+07	1.90237e+07	2.11477e+07	0.134878	0.87249	0.0366306	0.199471	-0.196789	2.32575
P59665	1	1	30.45	0.217657	1.26393	Condition 1	Condition 2	Neutrophil defensin 1 OS=Homo sapiens GN=DEFA1 PE=1 SV=1	2.43085e+07	2.53443e+07	2.65324e+07	2.53951e+07	0.0438195	2.06325e+07	2.57132e+07	1.39307e+07	2.00921e+07	0.294136	0.791182	0.0684832	0.201388	-0.337919	2.31195
Q09028	1	1	23.99	0.21977	1.3872	Condition 1	Condition 2	Histone-binding protein RBBP4 OS=Homo sapiens GN=RBBP4 PE=1 SV=3	622031	1.01869e+06	1.14848e+06	929734	0.294994	604904	609837	795929	670223	0.162472	0.720876	0.272339	0.202376	-0.472176	2.30489
P62191	2	2	108.38	0.218674	1.17072	Condition 2	Condition 1	26S protease regulatory subunit 4 OS=Homo sapiens GN=PSMC1 PE=1 SV=1	1.13626e+07	1.62101e+07	1.5221e+07	1.42646e+07	0.179562	1.79167e+07	1.6095e+07	1.60876e+07	1.66997e+07	0.0631095	1.17072	0.289578	0.202461	0.227391	2.30428
O14744	1	1	17.43	0.218658	1.23968	Condition 1	Condition 2	Protein arginine N-methyltransferase 5 OS=Homo sapiens GN=PRMT5 PE=1 SV=4	5.12274e+06	3.76034e+06	4.48889e+06	4.45732e+06	0.152951	3.98457e+06	4.02794e+06	2.77414e+06	3.59555e+06	0.197937	0.806661	0.957045	0.20446	-0.309965	2.29011
Q7L1Q6	1	1	25.57	0.198034	1.25605	Condition 1	Condition 2	Basic leucine zipper and W2 domain-containing protein 1 OS=Homo sapiens GN=BZW1 PE=1 SV=1	5.00064e+06	3.44468e+06	3.84691e+06	4.09741e+06	0.197115	3.68573e+06	2.69139e+06	3.4093e+06	3.26214e+06	0.157332	0.796147	0.575309	0.205113	-0.328894	2.28551
P50990	3	3	125.93	0.202809	1.16417	Condition 1	Condition 2	T-complex protein 1 subunit theta OS=Homo sapiens GN=CCT8 PE=1 SV=4	5.6852e+07	4.31385e+07	5.02941e+07	5.00948e+07	0.136918	4.8006e+07	4.01376e+07	4.09478e+07	4.30305e+07	0.100579	0.85898	0.569549	0.205875	-0.219303	2.28016
Q9BUF5	10	6	761.78	0.209452	1.08112	Condition 1	Condition 2	Tubulin beta-6 chain OS=Homo sapiens GN=TUBB6 PE=1 SV=1	1.7161e+08	1.83423e+08	1.93601e+08	1.82878e+08	0.0601797	1.71804e+08	1.56748e+08	1.78915e+08	1.69156e+08	0.0669104	0.924966	0.971986	0.206651	-0.112527	2.27473
P50148	1	1	79.8	0.213686	1.21123	Condition 1	Condition 2	Guanine nucleotide-binding protein G(q) subunit alpha OS=Homo sapiens GN=GNAQ PE=1 SV=4	1.28229e+07	8.5955e+06	1.10909e+07	1.08365e+07	0.196113	9.44661e+06	8.95772e+06	8.43558e+06	8.94664e+06	0.0565137	0.825606	0.107141	0.208392	-0.276475	2.26263
Q96FW1	2	2	83.97	0.212618	1.23682	Condition 1	Condition 2	Ubiquitin thioesterase OTUB1 OS=Homo sapiens GN=OTUB1 PE=1 SV=2	9.17329e+06	1.09844e+07	1.27252e+07	1.0961e+07	0.162035	8.97154e+06	7.14942e+06	1.04656e+07	8.86219e+06	0.187402	0.808522	0.932997	0.209234	-0.306641	2.25681
P28062	1	1	17.58	0.215095	1.2963	Condition 2	Condition 1	Proteasome subunit beta type-8 OS=Homo sapiens GN=PSMB8 PE=1 SV=3	1.15089e+06	778520	1.06004e+06	996483	0.194837	1.27189e+06	1.01825e+06	1.58507e+06	1.29174e+06	0.219804	1.2963	0.637216	0.211274	0.374398	2.24281
Q8WVC6	1	1	15.81	0.223499	1.22118	Condition 1	Condition 2	Dephospho-CoA kinase domain-containing protein OS=Homo sapiens GN=DCAKD PE=1 SV=1	2.65637e+06	2.30685e+06	2.38684e+06	2.45002e+06	0.0747445	2.45515e+06	2.07025e+06	1.49343e+06	2.00628e+06	0.241265	0.818881	0.250417	0.211689	-0.288274	2.23998
P63244	1	1	107.15	0.206104	1.13299	Condition 1	Condition 2	Guanine nucleotide-binding protein subunit beta-2-like 1 OS=Homo sapiens GN=GNB2L1 PE=1 SV=3	4.70311e+07	4.51038e+07	5.04889e+07	4.75412e+07	0.0573935	4.85148e+07	4.03675e+07	3.70006e+07	4.1961e+07	0.141088	0.882622	0.350406	0.212295	-0.180132	2.23585
Q9BVK6	2	2	67.5	0.216222	1.11802	Condition 1	Condition 2	Transmembrane emp24 domain-containing protein 9 OS=Homo sapiens GN=TMED9 PE=1 SV=2	3.66745e+07	3.00774e+07	3.35922e+07	3.34481e+07	0.0986889	3.02545e+07	2.72558e+07	3.22412e+07	2.99171e+07	0.0838899	0.894436	0.732629	0.214278	-0.16095	2.22245
Q07075	1	1	20.45	0.248073	1.43299	Condition 1	Condition 2	Glutamyl aminopeptidase OS=Homo sapiens GN=ENPEP PE=1 SV=3	455756	934445	830210	740137	0.34012	592095	515537	441858	516497	0.145448	0.697839	0.163547	0.214367	-0.519033	2.22185
Q9Y2S2	1	1	17.49	0.249688	1.49362	Condition 1	Condition 2	Lambda-crystallin homolog OS=Homo sapiens GN=CRYL1 PE=1 SV=3	8.76622e+06	1.37905e+07	1.08208e+07	1.11258e+07	0.227036	8.62661e+06	1.02275e+07	3.49261e+06	7.4489e+06	0.472352	0.669514	0.680211	0.215413	-0.578815	2.21482
P43490	3	3	108.14	0.199441	1.21086	Condition 1	Condition 2	Nicotinamide phosphoribosyltransferase OS=Homo sapiens GN=NAMPT PE=1 SV=1	2.19958e+07	2.33883e+07	3.07053e+07	2.53631e+07	0.184462	2.07597e+07	2.33117e+07	1.87678e+07	2.09464e+07	0.108739	0.825861	0.383204	0.215468	-0.276029	2.21445
P06396	10	10	924.55	0.221927	1.09726	Condition 1	Condition 2	Gelsolin OS=Homo sapiens GN=GSN PE=1 SV=1	1.37668e+09	1.40586e+09	1.48459e+09	1.42237e+09	0.0392422	1.42115e+09	1.31996e+09	1.14778e+09	1.2963e+09	0.10662	0.911363	0.280453	0.216785	-0.133902	2.20566
P11216	7	4	218.17	0.216378	1.08597	Condition 1	Condition 2	Glycogen phosphorylase, brain form OS=Homo sapiens GN=PYGB PE=1 SV=5	5.18102e+07	5.122e+07	5.66103e+07	5.32135e+07	0.0555591	4.92182e+07	4.48862e+07	5.28977e+07	4.90007e+07	0.0818392	0.920833	0.704272	0.2169	-0.118988	2.2049
P28330	1	1	123.32	0.173133	1.51546	Condition 1	Condition 2	Long-chain specific acyl-CoA dehydrogenase, mitochondrial OS=Homo sapiens GN=ACADL PE=2 SV=2	3.7816e+06	7.59872e+06	7.02812e+06	6.13615e+06	0.335546	3.76228e+06	3.99923e+06	4.3856e+06	4.04904e+06	0.0777052	0.659867	0.0456366	0.219161	-0.599754	2.18994
P62701	2	2	78.13	0.220603	1.10334	Condition 2	Condition 1	40S ribosomal protein S4, X isoform OS=Homo sapiens GN=RPS4X PE=1 SV=2	1.74429e+07	1.87492e+07	1.56624e+07	1.72848e+07	0.089644	2.05673e+07	1.89873e+07	1.76585e+07	1.9071e+07	0.076358	1.10334	0.938006	0.219375	0.141876	2.18853
Q9NPG4	1	1	13.14	0.159417	1.94719	Condition 2	Condition 1	Protocadherin-12 OS=Homo sapiens GN=PCDH12 PE=2 SV=1	4.03131e+07	3.76471e+07	3.68705e+07	3.82769e+07	0.0471735	1.05793e+08	8.22121e+07	3.5592e+07	7.45324e+07	0.479323	1.94719	0.00509619	0.220617	0.961393	2.18038
Q8NB66	1	1	13.12	0.219807	1.21313	Condition 2	Condition 1	Protein unc-13 homolog C OS=Homo sapiens GN=UNC13C PE=1 SV=3	2.32265e+07	1.82453e+07	1.45274e+07	1.86664e+07	0.23383	2.48531e+07	2.12153e+07	2.18659e+07	2.26448e+07	0.0856683	1.21313	0.329909	0.222588	0.278735	2.16755
Q6ICL3	1	1	34.33	0.216918	1.21358	Condition 1	Condition 2	Uncharacterized protein C22orf25 OS=Homo sapiens GN=C22orf25 PE=2 SV=1	1.13988e+06	854612	890175	961555	0.161668	918540	655827	802612	792326	0.166167	0.824005	0.83538	0.223594	-0.279274	2.16105
Q96HN2	1	1	58.59	0.223991	1.12307	Condition 1	Condition 2	Putative adenosylhomocysteinase 3 OS=Homo sapiens GN=AHCYL2 PE=1 SV=1	1.40875e+07	1.20864e+07	1.35331e+07	1.32357e+07	0.0780587	1.14488e+07	1.05591e+07	1.33478e+07	1.17852e+07	0.120868	0.890414	0.689434	0.226569	-0.167451	2.14198
Q8TF09	1	1	43.5	0.250271	1.19636	Condition 1	Condition 2	Dynein light chain roadblock-type 2 OS=Homo sapiens GN=DYNLRB2 PE=1 SV=1	1.39547e+07	1.9758e+07	2.01226e+07	1.79451e+07	0.192843	1.6071e+07	1.4612e+07	1.43164e+07	1.49998e+07	0.0626278	0.835872	0.137265	0.227911	-0.258647	2.13346
Q96MI9	1	1	16.39	0.217789	1.44814	Condition 1	Condition 2	Cytosolic carboxypeptidase 4 OS=Homo sapiens GN=AGBL1 PE=2 SV=2	1.62586e+06	1.69131e+06	2.48373e+06	1.93363e+06	0.246957	1.27551e+06	1.91487e+06	815371	1.33525e+06	0.413538	0.690539	0.85576	0.228703	-0.534205	2.12845
Q07020	2	2	136.54	0.220475	1.09226	Condition 1	Condition 2	60S ribosomal protein L18 OS=Homo sapiens GN=RPL18 PE=1 SV=2	3.85171e+07	3.88256e+07	4.45726e+07	4.06384e+07	0.0839253	3.55922e+07	3.60182e+07	4.00068e+07	3.72057e+07	0.0654507	0.915531	0.67531	0.228966	-0.12732	2.12679
Q7Z407	1	1	25.33	0.234284	1.25819	Condition 1	Condition 2	CUB and sushi domain-containing protein 3 OS=Homo sapiens GN=CSMD3 PE=2 SV=3	2.52209e+08	2.07246e+08	1.55692e+08	2.05049e+08	0.235533	1.81122e+08	1.61615e+08	1.46179e+08	1.62972e+08	0.107449	0.794795	0.232382	0.228996	-0.331345	2.12661
P25685	1	1	51.26	0.207044	1.33106	Condition 1	Condition 2	DnaJ homolog subfamily B member 1 OS=Homo sapiens GN=DNAJB1 PE=1 SV=4	2.29989e+07	1.59605e+07	1.36429e+07	1.75341e+07	0.277884	1.56303e+07	1.22507e+07	1.16381e+07	1.3173e+07	0.163211	0.751278	0.325945	0.229079	-0.41258	2.12608
P22234	1	1	82.31	0.262858	1.31328	Condition 2	Condition 1	Multifunctional protein ADE2 OS=Homo sapiens GN=PAICS PE=1 SV=3	2.15904e+06	4.32058e+06	4.5632e+06	3.68094e+06	0.359575	5.39252e+06	4.59247e+06	4.51731e+06	4.8341e+06	0.100343	1.31328	0.236813	0.229471	0.393174	2.12362
P48637	1	1	30.46	0.226027	1.1607	Condition 2	Condition 1	Glutathione synthetase OS=Homo sapiens GN=GSS PE=1 SV=1	1.89637e+07	1.88437e+07	2.05805e+07	1.94626e+07	0.0498364	1.91176e+07	2.2156e+07	2.64973e+07	2.25903e+07	0.164184	1.1607	0.128023	0.230511	0.214997	2.1171
Q9Y4L1	4	4	316.63	0.204627	1.28785	Condition 1	Condition 2	Hypoxia up-regulated protein 1 OS=Homo sapiens GN=HYOU1 PE=1 SV=1	1.52113e+07	1.00748e+07	1.01916e+07	1.18259e+07	0.247964	8.52967e+06	1.07674e+07	8.25082e+06	9.18264e+06	0.150233	0.776486	0.362427	0.230603	-0.364967	2.11652
Q9UHY7	2	2	42.9	0.234475	1.08069	Condition 1	Condition 2	Enolase-phosphatase E1 OS=Homo sapiens GN=ENOPH1 PE=1 SV=1	9.87542e+06	1.13104e+07	1.12454e+07	1.08104e+07	0.0749628	9.75286e+06	9.60259e+06	1.06542e+07	1.00032e+07	0.0568564	0.925331	0.660022	0.230756	-0.111958	2.11556
P36871	11	10	623.08	0.228605	1.10002	Condition 2	Condition 1	Phosphoglucomutase-1 OS=Homo sapiens GN=PGM1 PE=1 SV=3	3.75376e+08	4.14962e+08	4.73922e+08	4.2142e+08	0.117671	4.46273e+08	4.71229e+08	4.73208e+08	4.6357e+08	0.032384	1.10002	0.167907	0.231603	0.137529	2.11027
P28676	1	1	19.94	0.274156	1.52686	Condition 2	Condition 1	Grancalcin OS=Homo sapiens GN=GCA PE=1 SV=2	265609	773555	962944	667369	0.540316	742663	1.19394e+06	1.12033e+06	1.01898e+06	0.2376	1.52686	0.621462	0.233502	0.610565	2.0985
Q99829	1	1	35.82	0.23902	1.0813	Condition 1	Condition 2	Copine-1 OS=Homo sapiens GN=CPNE1 PE=1 SV=1	6.61769e+06	5.91392e+06	6.75541e+06	6.42901e+06	0.0702071	6.39801e+06	5.80356e+06	5.63524e+06	5.9456e+06	0.0673998	0.924809	0.881583	0.237676	-0.112773	2.07293
Q9UHQ9	3	3	82.91	0.249811	1.09056	Condition 1	Condition 2	NADH-cytochrome b5 reductase 1 OS=Homo sapiens GN=CYB5R1 PE=1 SV=1	2.37503e+07	2.0139e+07	2.30458e+07	2.23117e+07	0.0857992	2.16826e+07	1.90095e+07	2.06848e+07	2.0459e+07	0.0660236	0.916962	0.664789	0.242646	-0.125067	2.04308
P51553	2	2	206.62	0.231775	1.54143	Condition 1	Condition 2	Isocitrate dehydrogenase [NAD] subunit gamma, mitochondrial OS=Homo sapiens GN=IDH3G PE=1 SV=1	1.69736e+07	2.23445e+07	3.67799e+07	2.5366e+07	0.403808	1.75887e+07	2.06956e+07	1.10841e+07	1.64561e+07	0.298053	0.648747	0.373047	0.245762	-0.624271	2.02467
P55083	1	1	33.78	0.245609	1.14788	Condition 1	Condition 2	Microfibril-associated glycoprotein 4 OS=Homo sapiens GN=MFAP4 PE=1 SV=2	2.37267e+07	2.75057e+07	3.27134e+07	2.79819e+07	0.161255	2.4332e+07	2.3456e+07	2.53434e+07	2.43771e+07	0.0387445	0.871174	0.0839479	0.247072	-0.198967	2.017
O60488	1	1	52.29	0.242593	1.06464	Condition 1	Condition 2	Long-chain-fatty-acid--CoA ligase 4 OS=Homo sapiens GN=ACSL4 PE=1 SV=2	1.24421e+07	1.24024e+07	1.33089e+07	1.27178e+07	0.0402831	1.12134e+07	1.17525e+07	1.28708e+07	1.19456e+07	0.0707687	0.939281	0.53722	0.247447	-0.0903717	2.01481
P63208	3	2	121.4	0.25089	1.25003	Condition 1	Condition 2	S-phase kinase-associated protein 1 OS=Homo sapiens GN=SKP1 PE=1 SV=2	2.23399e+07	2.89931e+07	3.71357e+07	2.94895e+07	0.251289	2.22477e+07	2.53016e+07	2.32238e+07	2.3591e+07	0.0661142	0.79998	0.0848411	0.24861	-0.321965	2.00804
P63096	7	3	333.06	0.233223	1.22886	Condition 1	Condition 2	Guanine nucleotide-binding protein G(i) subunit alpha-1 OS=Homo sapiens GN=GNAI1 PE=1 SV=2	7.33044e+07	8.30265e+07	1.133e+08	8.98768e+07	0.232085	6.97726e+07	7.9265e+07	7.03784e+07	7.31387e+07	0.0726598	0.813765	0.121902	0.249277	-0.297315	2.00418
P55884	4	4	127.37	0.267307	1.20259	Condition 1	Condition 2	Eukaryotic translation initiation factor 3 subunit B OS=Homo sapiens GN=EIF3B PE=1 SV=3	1.00639e+07	1.48257e+07	1.34024e+07	1.2764e+07	0.191497	1.14278e+07	1.12912e+07	9.12221e+06	1.06138e+07	0.121872	0.831537	0.43757	0.249306	-0.266147	2.00401
P15104	1	1	102.29	0.223712	1.54564	Condition 1	Condition 2	Glutamine synthetase OS=Homo sapiens GN=GLUL PE=1 SV=4	4.80437e+06	1.00932e+07	1.07766e+07	8.55805e+06	0.381943	5.93552e+06	5.32691e+06	5.34826e+06	5.5369e+06	0.0623786	0.646981	0.0220833	0.249708	-0.628205	2.00169
P38606	1	1	76.97	0.275501	1.24676	Condition 2	Condition 1	V-type proton ATPase catalytic subunit A OS=Homo sapiens GN=ATP6V1A PE=1 SV=2	5.47814e+06	9.52042e+06	1.04866e+07	8.49504e+06	0.312771	1.08442e+07	9.99848e+06	1.09312e+07	1.05913e+07	0.0486456	1.24676	0.0724769	0.250854	0.318183	1.99508
P60983	1	1	51.1	0.179492	1.42254	Condition 1	Condition 2	Glia maturation factor beta OS=Homo sapiens GN=GMFB PE=1 SV=2	2.50715e+07	1.84437e+07	1.29173e+07	1.88108e+07	0.323507	1.42762e+07	1.2564e+07	1.28299e+07	1.32234e+07	0.0696827	0.702966	0.0448267	0.251135	-0.508474	1.99347
P49721	1	1	31.35	0.235938	1.19217	Condition 1	Condition 2	Proteasome subunit beta type-2 OS=Homo sapiens GN=PSMB2 PE=1 SV=1	1.28531e+07	9.89632e+06	1.04785e+07	1.1076e+07	0.141418	1.12708e+07	8.34237e+06	8.25875e+06	9.29065e+06	0.184638	0.83881	0.909346	0.253928	-0.253584	1.97751
Q8IXN7	1	1	14.15	0.246828	1.26823	Condition 2	Condition 1	N-acetylaspartyl-glutamate synthetase A OS=Homo sapiens GN=RIMKLA PE=2 SV=2	4.99581e+07	7.17135e+07	1.00717e+08	7.41297e+07	0.34353	9.47714e+07	8.89463e+07	9.83229e+07	9.40135e+07	0.0503548	1.26823	0.0668072	0.254403	0.342817	1.97481
P50395	12	8	691.77	0.256849	1.09648	Condition 1	Condition 2	Rab GDP dissociation inhibitor beta OS=Homo sapiens GN=GDI2 PE=1 SV=2	3.25223e+08	3.64567e+08	3.99048e+08	3.62946e+08	0.101776	3.2863e+08	3.13158e+08	3.51243e+08	3.3101e+08	0.0578645	0.912009	0.423784	0.254479	-0.132879	1.97438
Q9Y265	1	1	17.07	0.280361	1.27504	Condition 1	Condition 2	RuvB-like 1 OS=Homo sapiens GN=RUVBL1 PE=1 SV=1	273987	469528	408521	384012	0.260534	267620	286711	349199	301177	0.141678	0.78429	0.307807	0.257582	-0.350541	1.9569
Q9UNN8	1	1	24.75	0.274737	1.11805	Condition 1	Condition 2	Endothelial protein C receptor OS=Homo sapiens GN=PROCR PE=1 SV=1	8.39439e+06	6.59074e+06	8.20519e+06	7.73011e+06	0.128232	7.21652e+06	7.07864e+06	6.44667e+06	6.91394e+06	0.0593734	0.894418	0.292793	0.258037	-0.160979	1.95435
P49760	1	1	16.63	0.28	1.22526	Condition 1	Condition 2	Dual specificity protein kinase CLK2 OS=Homo sapiens GN=CLK2 PE=1 SV=1	4.61804e+07	3.89972e+07	4.13095e+07	4.21624e+07	0.0869668	3.94055e+07	2.34309e+07	4.0396e+07	3.44108e+07	0.276708	0.816151	0.258285	0.258573	-0.293093	1.95136
P62854	1	1	66.86	0.254423	1.05576	Condition 1	Condition 2	40S ribosomal protein S26 OS=Homo sapiens GN=RPS26 PE=1 SV=3	1.67545e+07	1.635e+07	1.72825e+07	1.67957e+07	0.0278428	1.55471e+07	1.50596e+07	1.71192e+07	1.59087e+07	0.0676587	0.947189	0.317572	0.260631	-0.0782764	1.93992
P54619	1	1	14.05	0.299477	1.27469	Condition 1	Condition 2	5'-AMP-activated protein kinase subunit gamma-1 OS=Homo sapiens GN=PRKAG1 PE=1 SV=1	7.93798e+07	1.3362e+08	1.30919e+08	1.1464e+08	0.266625	1.03159e+08	8.60501e+07	8.05966e+07	8.99353e+07	0.130898	0.784503	0.258352	0.26148	-0.350149	1.93523
P22676	4	4	224.78	0.277848	1.12244	Condition 1	Condition 2	Calretinin OS=Homo sapiens GN=CALB2 PE=1 SV=2	1.42515e+08	1.73556e+08	1.90176e+08	1.68749e+08	0.143357	1.53894e+08	1.45857e+08	1.51272e+08	1.50341e+08	0.0272603	0.890914	0.0558001	0.263615	-0.166643	1.92349
Q8IUZ5	1	1	20.28	0.268252	1.13114	Condition 2	Condition 1	5-phosphohydroxy-L-lysine phospho-lyase OS=Homo sapiens GN=AGXT2L2 PE=1 SV=1	3.12483e+06	4.09013e+06	3.69157e+06	3.63551e+06	0.133429	4.47297e+06	3.66534e+06	4.19847e+06	4.11226e+06	0.0998616	1.13114	0.834963	0.263685	0.177775	1.92312
P14618	18	18	1622.34	0.260262	1.08845	Condition 1	Condition 2	Pyruvate kinase isozymes M1/M2 OS=Homo sapiens GN=PKM PE=1 SV=4	1.47581e+09	1.57925e+09	1.81375e+09	1.62294e+09	0.106691	1.50155e+09	1.45477e+09	1.51682e+09	1.49105e+09	0.0216835	0.918734	0.0673795	0.264423	-0.122281	1.91908
P07686	1	1	13.7	0.19523	1.7981	Condition 1	Condition 2	Beta-hexosaminidase subunit beta OS=Homo sapiens GN=HEXB PE=1 SV=3	516357	755071	675523	648984	0.187293	785116	109167	188502	360928	1.02373	0.556144	0.1953	0.268887	-0.84647	1.89493
O75369	20	18	732.19	0.278751	1.06754	Condition 2	Condition 1	Filamin-B OS=Homo sapiens GN=FLNB PE=1 SV=2	3.41542e+08	3.32226e+08	3.59558e+08	3.44442e+08	0.0403396	3.85527e+08	3.35117e+08	3.82478e+08	3.67707e+08	0.0768688	1.06754	0.389244	0.269921	0.0942963	1.88939
P14868	3	3	90.37	0.255082	1.09775	Condition 1	Condition 2	Aspartate--tRNA ligase, cytoplasmic OS=Homo sapiens GN=DARS PE=1 SV=2	4.59836e+07	4.81206e+07	4.55313e+07	4.65451e+07	0.0297123	4.86285e+07	3.85248e+07	4.00478e+07	4.24004e+07	0.128471	0.910952	0.121109	0.270569	-0.134554	1.88593
P30049	1	1	18.45	0.263545	1.74053	Condition 1	Condition 2	ATP synthase subunit delta, mitochondrial OS=Homo sapiens GN=ATP5D PE=1 SV=2	2.49886e+07	5.21073e+07	2.35204e+07	3.35387e+07	0.479969	2.19191e+07	2.84682e+07	7.42064e+06	1.92693e+07	0.558975	0.574539	0.618508	0.270998	-0.799524	1.88365
P50570	6	6	201.77	0.222813	1.10452	Condition 1	Condition 2	Dynamin-2 OS=Homo sapiens GN=DNM2 PE=1 SV=2	4.17486e+07	5.03346e+07	5.12251e+07	4.77694e+07	0.109551	4.3727e+07	4.24651e+07	4.35551e+07	4.32491e+07	0.0158227	0.905371	0.0336238	0.272261	-0.143419	1.87694
O00499	1	1	53.6	0.257929	1.38542	Condition 1	Condition 2	Myc box-dependent-interacting protein 1 OS=Homo sapiens GN=BIN1 PE=1 SV=1	1.45727e+06	1.81693e+06	2.88536e+06	2.05318e+06	0.361771	1.64049e+06	1.5881e+06	1.21739e+06	1.48199e+06	0.15563	0.721802	0.175878	0.272287	-0.470326	1.8768
Q96HD1	1	1	34.17	0.27515	1.10715	Condition 2	Condition 1	Cysteine-rich with EGF-like domain protein 1 OS=Homo sapiens GN=CRELD1 PE=1 SV=3	4.90698e+06	5.25375e+06	5.63878e+06	5.26651e+06	0.0695082	6.5252e+06	5.16977e+06	5.79752e+06	5.83083e+06	0.116335	1.10715	0.451091	0.273551	0.146856	1.87012
P55209	3	2	216.41	0.263136	1.19267	Condition 1	Condition 2	Nucleosome assembly protein 1-like 1 OS=Homo sapiens GN=NAP1L1 PE=1 SV=1	9.13081e+06	1.02545e+07	1.3207e+07	1.08641e+07	0.193788	8.61837e+06	1.04269e+07	8.28187e+06	9.10905e+06	0.126647	0.838454	0.461841	0.274148	-0.254196	1.86697
Q15185	1	1	41.91	0.320097	1.23514	Condition 1	Condition 2	Prostaglandin E synthase 3 OS=Homo sapiens GN=PTGES3 PE=1 SV=1	1.39279e+07	2.16899e+07	2.34673e+07	1.9695e+07	0.257575	1.56614e+07	1.53082e+07	1.68672e+07	1.59456e+07	0.0512647	0.809626	0.0506168	0.274919	-0.304672	1.86292
P35914	1	1	26.47	0.304139	1.40807	Condition 1	Condition 2	Hydroxymethylglutaryl-CoA lyase, mitochondrial OS=Homo sapiens GN=HMGCL PE=1 SV=2	47376.3	99136.5	84831.8	77114.9	0.346613	43386	71711.3	49201.3	54766.2	0.273165	0.71019	0.477074	0.27496	-0.493723	1.86271
P12814	35	23	2803.18	0.26507	1.07017	Condition 2	Condition 1	Alpha-actinin-1 OS=Homo sapiens GN=ACTN1 PE=1 SV=2	6.08295e+08	6.288e+08	7.19394e+08	6.52163e+08	0.0906517	6.99609e+08	6.76006e+08	7.18163e+08	6.97926e+08	0.0302733	1.07017	0.226516	0.275351	0.0978407	1.86066
P53621	2	2	106.08	0.273893	1.08228	Condition 2	Condition 1	Coatomer subunit alpha OS=Homo sapiens GN=COPA PE=1 SV=2	1.2917e+07	1.26034e+07	1.34634e+07	1.29946e+07	0.0334938	1.55899e+07	1.37721e+07	1.28294e+07	1.40638e+07	0.0997745	1.08228	0.175529	0.276002	0.114073	1.85725
P06703	1	1	31.67	0.277714	1.09672	Condition 1	Condition 2	Protein S100-A6 OS=Homo sapiens GN=S100A6 PE=1 SV=1	1.63019e+07	1.84927e+07	1.47615e+07	1.65187e+07	0.113508	1.53614e+07	1.55696e+07	1.42547e+07	1.50619e+07	0.0469234	0.911809	0.248811	0.276414	-0.133197	1.8551
O96000	1	1	25.58	0.351215	1.53868	Condition 1	Condition 2	NADH dehydrogenase [ubiquinone] 1 beta subcomplex subunit 10 OS=Homo sapiens GN=NDUFB10 PE=1 SV=3	1.34375e+06	3.224e+06	3.4907e+06	2.68615e+06	0.435634	2.21092e+06	1.13189e+06	1.89445e+06	1.74575e+06	0.317726	0.649909	0.366922	0.276889	-0.62169	1.85262
P62195	2	2	150.61	0.305582	1.23947	Condition 1	Condition 2	26S protease regulatory subunit 8 OS=Homo sapiens GN=PSMC5 PE=1 SV=1	6.66112e+06	9.7561e+06	1.10909e+07	9.16938e+06	0.247828	7.01716e+06	6.74284e+06	8.43341e+06	7.3978e+06	0.122643	0.806794	0.27498	0.278113	-0.309727	1.84626
P51659	4	4	238.42	0.291039	1.08027	Condition 1	Condition 2	Peroxisomal multifunctional enzyme type 2 OS=Homo sapiens GN=HSD17B4 PE=1 SV=3	4.7041e+07	5.42869e+07	5.68308e+07	5.27196e+07	0.0963513	4.99653e+07	4.98334e+07	4.6608e+07	4.88022e+07	0.038961	0.925695	0.245788	0.279122	-0.111391	1.84103
Q9H4M9	9	9	545.26	0.197178	1.19981	Condition 1	Condition 2	EH domain-containing protein 1 OS=Homo sapiens GN=EHD1 PE=1 SV=2	2.16457e+08	2.27889e+08	3.07696e+08	2.50681e+08	0.198288	2.1176e+08	2.06882e+08	2.08161e+08	2.08934e+08	0.0121046	0.833469	0.0051641	0.282843	-0.2628	1.82193
Q06033	1	1	45.38	0.273156	1.14251	Condition 2	Condition 1	Inter-alpha-trypsin inhibitor heavy chain H3 OS=Homo sapiens GN=ITIH3 PE=1 SV=2	5.49375e+06	7.19509e+06	6.01246e+06	6.23377e+06	0.139882	6.83891e+06	6.41107e+06	8.11635e+06	7.12211e+06	0.124572	1.14251	0.982698	0.28379	0.192201	1.8171
P02545	14	14	682.84	0.285154	1.07108	Condition 1	Condition 2	Prelamin-A/C OS=Homo sapiens GN=LMNA PE=1 SV=1	3.58647e+08	3.35762e+08	3.97594e+08	3.64001e+08	0.0858828	3.25031e+08	3.50342e+08	3.44164e+08	3.39846e+08	0.0388308	0.93364	0.30249	0.285092	-0.0990624	1.8105
Q16531	3	3	58.09	0.284308	1.13917	Condition 1	Condition 2	DNA damage-binding protein 1 OS=Homo sapiens GN=DDB1 PE=1 SV=1	7.44492e+06	8.50204e+06	9.85034e+06	8.5991e+06	0.140206	6.90474e+06	7.20389e+06	8.53711e+06	7.54858e+06	0.115129	0.877834	0.683856	0.288021	-0.18798	1.79575
P14384	1	1	21.69	0.28942	1.23881	Condition 1	Condition 2	Carboxypeptidase M OS=Homo sapiens GN=CPM PE=1 SV=2	1.25067e+06	1.40313e+06	1.71612e+06	1.45664e+06	0.162906	835432	1.22302e+06	1.46907e+06	1.17584e+06	0.271673	0.807227	0.711184	0.288723	-0.308954	1.79224
O00764	1	1	29.77	0.244657	1.18547	Condition 1	Condition 2	Pyridoxal kinase OS=Homo sapiens GN=PDXK PE=1 SV=1	1.55025e+07	1.54166e+07	1.56539e+07	1.55244e+07	0.00774076	1.56063e+07	1.38434e+07	9.83672e+06	1.30955e+07	0.225775	0.843544	0.00329848	0.290646	-0.245464	1.78267
P08670	41	40	3569.36	0.285994	1.04005	Condition 2	Condition 1	Vimentin OS=Homo sapiens GN=VIM PE=1 SV=4	3.08956e+10	3.19102e+10	3.44303e+10	3.2412e+10	0.0561517	3.41383e+10	3.35342e+10	3.34582e+10	3.37103e+10	0.0110552	1.04005	0.0804834	0.292764	0.0566579	1.77219
O95954	1	1	13.2	0.22992	1.06237	Condition 2	Condition 1	Formimidoyltransferase-cyclodeaminase OS=Homo sapiens GN=FTCD PE=1 SV=2	3.27209e+07	3.27168e+07	3.31214e+07	3.2853e+07	0.00707527	3.45011e+07	3.26106e+07	3.75941e+07	3.49019e+07	0.0720825	1.06237	0.0169284	0.293365	0.087281	1.76923
Q13162	4	3	181.48	0.308822	1.13021	Condition 1	Condition 2	Peroxiredoxin-4 OS=Homo sapiens GN=PRDX4 PE=1 SV=1	5.87026e+07	7.15063e+07	7.70391e+07	6.90827e+07	0.136148	6.56557e+07	6.40373e+07	5.36782e+07	6.11237e+07	0.106319	0.884791	0.646268	0.294329	-0.176592	1.7645
Q9NTK5	2	2	43.4	0.278358	1.14392	Condition 2	Condition 1	Obg-like ATPase 1 OS=Homo sapiens GN=OLA1 PE=1 SV=2	7.57059e+06	8.03454e+06	1.01966e+07	8.60059e+06	0.16296	9.48914e+06	8.95586e+06	1.10703e+07	9.83842e+06	0.111768	1.14392	0.762036	0.295131	0.193992	1.76057
Q16891	6	5	346.69	0.290457	1.06235	Condition 2	Condition 1	Mitochondrial inner membrane protein OS=Homo sapiens GN=IMMT PE=1 SV=1	1.10877e+08	9.99056e+07	9.60262e+07	1.0227e+08	0.0753151	1.13304e+08	1.09335e+08	1.03301e+08	1.08647e+08	0.0463613	1.06235	0.599093	0.296298	0.0872655	1.75488
Q16698	1	1	26.63	0.329949	1.34134	Condition 1	Condition 2	2,4-dienoyl-CoA reductase, mitochondrial OS=Homo sapiens GN=DECR1 PE=1 SV=1	9.40348e+06	1.53396e+07	1.92314e+07	1.46582e+07	0.337646	9.51656e+06	1.34394e+07	9.82812e+06	1.0928e+07	0.199532	0.745525	0.3251	0.298234	-0.42367	1.74548
P09960	7	7	509.76	0.293068	1.04887	Condition 1	Condition 2	Leukotriene A-4 hydrolase OS=Homo sapiens GN=LTA4H PE=1 SV=2	1.33505e+08	1.27331e+08	1.32595e+08	1.31143e+08	0.0254159	1.34106e+08	1.2297e+08	1.18024e+08	1.25033e+08	0.0658794	0.953409	0.281403	0.299504	-0.0688325	1.73935
P34949	1	1	48.38	0.335811	1.16317	Condition 1	Condition 2	Mannose-6-phosphate isomerase OS=Homo sapiens GN=MPI PE=1 SV=2	7.42266e+06	5.07157e+06	6.9842e+06	6.49281e+06	0.192552	5.90947e+06	5.04193e+06	5.79455e+06	5.58198e+06	0.0844176	0.859718	0.248783	0.303105	-0.218065	1.72211
P48643	2	1	46.57	0.307969	1.14561	Condition 1	Condition 2	T-complex protein 1 subunit epsilon OS=Homo sapiens GN=CCT5 PE=1 SV=1	6.38191e+06	4.52058e+06	5.25782e+06	5.38677e+06	0.174008	4.85161e+06	4.28948e+06	4.96516e+06	4.70209e+06	0.0769466	0.872895	0.259344	0.303272	-0.19612	1.72131
Q8TF42	1	1	18.59	0.299834	1.18807	Condition 2	Condition 1	Ubiquitin-associated and SH3 domain-containing protein B OS=Homo sapiens GN=UBASH3B PE=1 SV=2	8.77246e+06	1.249e+07	1.52726e+07	1.21784e+07	0.267792	1.36511e+07	1.52853e+07	1.44698e+07	1.44687e+07	0.0564746	1.18807	0.118136	0.303405	0.248618	1.72068
Q9Y6N5	1	1	14.69	0.300229	1.11304	Condition 2	Condition 1	Sulfide:quinone oxidoreductase, mitochondrial OS=Homo sapiens GN=SQRDL PE=1 SV=1	1.24114e+07	1.04474e+07	1.18871e+07	1.1582e+07	0.0878015	1.47513e+07	1.22256e+07	1.16966e+07	1.28912e+07	0.12664	1.11304	0.559088	0.303744	0.154503	1.71907
P13807	1	1	74.61	0.294111	1.31032	Condition 1	Condition 2	Glycogen [starch] synthase, muscle OS=Homo sapiens GN=GYS1 PE=1 SV=2	3.94634e+06	6.62043e+06	7.39747e+06	5.98808e+06	0.302331	4.82517e+06	4.45865e+06	4.42597e+06	4.56993e+06	0.0485019	0.763172	0.0295369	0.307093	-0.38992	1.70325
P68871	13	6	1988.05	0.30169	1.09312	Condition 2	Condition 1	Hemoglobin subunit beta OS=Homo sapiens GN=HBB PE=1 SV=2	1.07454e+11	9.6923e+10	1.21598e+11	1.08658e+11	0.113949	1.18208e+11	1.10613e+11	1.27509e+11	1.18777e+11	0.0712454	1.09312	0.63678	0.307472	0.12845	1.70147
Q6ZQV5	1	1	13.72	0.312601	1.05338	Condition 2	Condition 1	Zinc finger protein 788 OS=Homo sapiens GN=ZNF788 PE=2 SV=2	1.36336e+08	1.52549e+08	1.51934e+08	1.4694e+08	0.0625318	1.5538e+08	1.4732e+08	1.61651e+08	1.54784e+08	0.0464152	1.05338	0.758805	0.308829	0.0750275	1.69512
Q9Y2J2	2	1	69.7	0.296115	1.2155	Condition 1	Condition 2	Band 4.1-like protein 3 OS=Homo sapiens GN=EPB41L3 PE=1 SV=2	2.973e+06	3.65794e+06	4.08345e+06	3.57146e+06	0.156869	2.27216e+06	3.7614e+06	2.78124e+06	2.93827e+06	0.257612	0.822708	0.707874	0.308903	-0.281548	1.69477
Q13098	1	1	48.29	0.301164	1.11623	Condition 1	Condition 2	COP9 signalosome complex subunit 1 OS=Homo sapiens GN=GPS1 PE=1 SV=4	8.55508e+06	7.82553e+06	9.371e+06	8.58387e+06	0.0900686	6.70784e+06	7.50854e+06	8.8537e+06	7.69002e+06	0.141011	0.895869	0.674034	0.309661	-0.158641	1.69124
O43681	1	1	20.14	0.294496	1.17362	Condition 1	Condition 2	ATPase ASNA1 OS=Homo sapiens GN=ASNA1 PE=1 SV=2	1.23519e+07	1.21125e+07	1.47834e+07	1.30826e+07	0.112957	1.08109e+07	8.84524e+06	1.37856e+07	1.11472e+07	0.223133	0.852067	0.521783	0.311071	-0.230961	1.68468
A8MWL6	1	1	15.19	0.308811	1.2001	Condition 2	Condition 1	Putative synaptogyrin-2 like protein OS=Homo sapiens PE=5 SV=1	6.95656e+08	1.01879e+09	1.22125e+09	9.78563e+08	0.270901	1.31767e+09	1.09441e+09	1.11103e+09	1.17437e+09	0.105913	1.2001	0.36085	0.311225	0.26315	1.68397
Q9Y2G9	1	1	18.76	0.225992	1.7675	Condition 2	Condition 1	Protein strawberry notch homolog 2 OS=Homo sapiens GN=SBNO2 PE=2 SV=3	11573.1	4853.13	44599.3	20341.9	1.04585	26822	34967.5	46073	35954.2	0.268768	1.7675	0.342058	0.311561	0.821708	1.68241
Q9NQC3	6	6	721.85	0.310808	1.05937	Condition 2	Condition 1	Reticulon-4 OS=Homo sapiens GN=RTN4 PE=1 SV=2	3.44252e+08	3.62293e+08	3.77385e+08	3.6131e+08	0.045912	3.74025e+08	3.60609e+08	4.13648e+08	3.82761e+08	0.0720496	1.05937	0.531379	0.312587	0.0832048	1.67767
Q9Y5E8	1	1	16.16	0.319058	1.10106	Condition 1	Condition 2	Protocadherin beta-15 OS=Homo sapiens GN=PCDHB15 PE=1 SV=1	4.02865e+07	4.70466e+07	4.81376e+07	4.51569e+07	0.0941826	4.5232e+07	3.62099e+07	4.15944e+07	4.10121e+07	0.110678	0.908214	0.934977	0.312711	-0.138896	1.6771
P62424	1	1	27.43	0.271447	2.79707	Condition 1	Condition 2	60S ribosomal protein L7a OS=Homo sapiens GN=RPL7A PE=1 SV=2	354329	441720	1.77883e+06	858294	0.930225	412824	461225	46515	306855	0.738968	0.357517	0.149282	0.313938	-1.48392	1.67145
P51570	1	1	39.51	0.329696	1.24357	Condition 2	Condition 1	Galactokinase OS=Homo sapiens GN=GALK1 PE=1 SV=1	5.38247e+06	1.00783e+07	1.0047e+07	8.50261e+06	0.317804	1.20861e+07	8.95336e+06	1.06813e+07	1.05736e+07	0.1484	1.24357	0.504341	0.314973	0.314487	1.6667
P13797	11	9	625.73	0.321014	1.09591	Condition 1	Condition 2	Plastin-3 OS=Homo sapiens GN=PLS3 PE=1 SV=4	2.31864e+08	2.60909e+08	2.9873e+08	2.63834e+08	0.127082	2.51621e+08	2.36912e+08	2.33704e+08	2.40745e+08	0.0396841	0.912487	0.150192	0.315289	-0.132125	1.66525
Q96BJ3	1	1	36.85	0.330811	1.24595	Condition 2	Condition 1	Axin interactor, dorsalization-associated protein OS=Homo sapiens GN=AIDA PE=1 SV=1	4.67841e+06	9.3179e+06	9.46463e+06	7.82031e+06	0.348062	1.09449e+07	9.04013e+06	9.24604e+06	9.74368e+06	0.107285	1.24595	0.257063	0.316976	0.317241	1.65755
Q7Z406	4	1	229.38	0.322463	1.26684	Condition 1	Condition 2	Myosin-14 OS=Homo sapiens GN=MYH14 PE=1 SV=2	1.04473e+06	607493	834763	828995	0.263784	537568	599438	826131	654379	0.232166	0.789365	0.651087	0.319458	-0.341236	1.6463
Q2TAA2	1	1	38.57	0.317822	1.1137	Condition 1	Condition 2	Isoamyl acetate-hydrolyzing esterase 1 homolog OS=Homo sapiens GN=IAH1 PE=1 SV=1	8.49741e+06	8.01672e+06	1.03868e+07	8.96698e+06	0.13972	7.69839e+06	7.65316e+06	8.80308e+06	8.05154e+06	0.0808843	0.897911	0.425437	0.324315	-0.155356	1.62453
P13073	1	1	54.88	0.323693	1.15811	Condition 1	Condition 2	Cytochrome c oxidase subunit 4 isoform 1, mitochondrial OS=Homo sapiens GN=COX4I1 PE=1 SV=1	5.1983e+07	3.63351e+07	4.1363e+07	4.3227e+07	0.184808	4.20886e+07	3.6568e+07	3.33197e+07	3.73255e+07	0.118773	0.863475	0.470898	0.325872	-0.211773	1.61762
Q15848	1	1	62.86	0.319251	1.22113	Condition 1	Condition 2	Adiponectin OS=Homo sapiens GN=ADIPOQ PE=1 SV=1	2.34503e+07	2.38595e+07	3.47879e+07	2.73659e+07	0.234998	1.77996e+07	2.3306e+07	2.61254e+07	2.24103e+07	0.188955	0.818915	0.60489	0.327423	-0.288214	1.61077
P39019	5	5	123.25	0.346538	1.13935	Condition 1	Condition 2	40S ribosomal protein S19 OS=Homo sapiens GN=RPS19 PE=1 SV=2	4.31405e+07	5.28905e+07	6.20759e+07	5.27023e+07	0.179671	4.25545e+07	4.69108e+07	4.93046e+07	4.62566e+07	0.0739841	0.877697	0.231058	0.329684	-0.188205	1.60085
P19404	2	2	66.26	0.355036	1.09152	Condition 1	Condition 2	NADH dehydrogenase [ubiquinone] flavoprotein 2, mitochondrial OS=Homo sapiens GN=NDUFV2 PE=1 SV=2	3.35157e+07	4.18135e+07	4.21553e+07	3.91615e+07	0.124929	3.76033e+07	3.54558e+07	3.45744e+07	3.58778e+07	0.0434237	0.916152	0.184138	0.330117	-0.126342	1.59895
Q9NTJ5	1	1	78.38	0.338295	1.16144	Condition 2	Condition 1	Phosphatidylinositide phosphatase SAC1 OS=Homo sapiens GN=SACM1L PE=1 SV=2	5.39844e+06	8.90955e+06	8.21879e+06	7.50893e+06	0.247716	9.22934e+06	8.40899e+06	8.52523e+06	8.72119e+06	0.0508986	1.16144	0.107764	0.333864	0.215918	1.58267
P42025	2	1	84.32	0.353398	1.14635	Condition 1	Condition 2	Beta-centractin OS=Homo sapiens GN=ACTR1B PE=1 SV=1	1.87667e+07	2.53069e+07	2.57395e+07	2.32711e+07	0.167886	2.31712e+07	1.96051e+07	1.81243e+07	2.03002e+07	0.127794	0.872336	0.611999	0.334163	-0.197044	1.58138
Q86UU1	2	2	117.13	0.336933	1.0564	Condition 2	Condition 1	Pleckstrin homology-like domain family B member 1 OS=Homo sapiens GN=PHLDB1 PE=1 SV=1	1.08976e+07	9.29152e+06	1.07141e+07	1.03011e+07	0.0853393	1.08376e+07	1.06425e+07	1.1166e+07	1.0882e+07	0.0243147	1.0564	0.166136	0.334588	0.0791563	1.57954
O75396	3	3	299.07	0.34444	1.05046	Condition 2	Condition 1	Vesicle-trafficking protein SEC22b OS=Homo sapiens GN=SEC22B PE=1 SV=4	9.98483e+07	9.58946e+07	1.00876e+08	9.88731e+07	0.026601	1.11032e+08	9.612e+07	1.04435e+08	1.03862e+08	0.0719444	1.05046	0.22047	0.336646	0.0710204	1.5707
Q13425	1	1	19.46	0.352466	1.34351	Condition 2	Condition 1	Beta-2-syntrophin OS=Homo sapiens GN=SNTB2 PE=1 SV=1	576361	1.9493e+06	1.93649e+06	1.48738e+06	0.530458	1.85653e+06	1.91091e+06	2.22749e+06	1.99831e+06	0.100248	1.34351	0.121124	0.338104	0.426005	1.56446
O00231	4	4	187.59	0.34187	1.05887	Condition 2	Condition 1	26S proteasome non-ATPase regulatory subunit 11 OS=Homo sapiens GN=PSMD11 PE=1 SV=3	2.9275e+07	3.12431e+07	3.0135e+07	3.02177e+07	0.0326523	3.48876e+07	3.14741e+07	2.96277e+07	3.19965e+07	0.083403	1.05887	0.240528	0.33978	0.0825194	1.55733
Q9Y3E5	1	1	47.15	0.314355	1.12546	Condition 1	Condition 2	Peptidyl-tRNA hydrolase 2, mitochondrial OS=Homo sapiens GN=PTRH2 PE=1 SV=1	3.58738e+06	3.98061e+06	4.03816e+06	3.86871e+06	0.0634158	3.10595e+06	3.01583e+06	4.1906e+06	3.43746e+06	0.190197	0.888528	0.246865	0.345029	-0.17051	1.53521
Q8WZ42	3	2	50.58	0.389246	1.40819	Condition 2	Condition 1	Titin OS=Homo sapiens GN=TTN PE=1 SV=4	4.98399e+07	5.10657e+07	5.76329e+07	5.28462e+07	0.0792963	3.98352e+07	8.53e+07	9.81176e+07	7.44176e+07	0.41156	1.40819	0.0367529	0.346496	0.493844	1.52909
Q8NBX0	1	1	34.18	0.296478	1.07322	Condition 2	Condition 1	Saccharopine dehydrogenase-like oxidoreductase OS=Homo sapiens GN=SCCPDH PE=1 SV=1	1.25017e+07	1.01882e+07	1.19195e+07	1.15365e+07	0.104311	1.24666e+07	1.24152e+07	1.22618e+07	1.23812e+07	0.00860556	1.07322	0.0155567	0.347922	0.101948	1.52317
P02787	42	42	4124.47	0.348816	1.04059	Condition 2	Condition 1	Serotransferrin OS=Homo sapiens GN=TF PE=1 SV=3	1.7753e+10	1.75976e+10	1.91172e+10	1.81559e+10	0.0460504	1.92917e+10	1.79003e+10	1.94869e+10	1.88929e+10	0.0457941	1.04059	0.965803	0.348497	0.0574078	1.52078
Q14232	1	1	27.03	0.338843	1.0787	Condition 2	Condition 1	Translation initiation factor eIF-2B subunit alpha OS=Homo sapiens GN=EIF2B1 PE=1 SV=1	2.23994e+06	1.94718e+06	1.92257e+06	2.03656e+06	0.0866948	2.0629e+06	2.1094e+06	2.41821e+06	2.19684e+06	0.0879084	1.0787	0.910583	0.348543	0.109291	1.52059
Q13492	2	2	159.76	0.34461	1.12719	Condition 1	Condition 2	Phosphatidylinositol-binding clathrin assembly protein OS=Homo sapiens GN=PICALM PE=1 SV=2	1.20041e+07	9.03543e+06	8.77715e+06	9.93888e+06	0.180419	8.59583e+06	9.24991e+06	8.60645e+06	8.8174e+06	0.0424848	0.887162	0.083635	0.348757	-0.172731	1.51971
Q9BZC1	1	1	14.48	0.354317	1.19878	Condition 2	Condition 1	CUGBP Elav-like family member 4 OS=Homo sapiens GN=CELF4 PE=1 SV=1	5.70992e+08	6.37599e+08	8.3358e+08	6.80724e+08	0.200526	8.37198e+08	9.78824e+08	6.32095e+08	8.16039e+08	0.21363	1.19878	0.760159	0.349502	0.261569	1.51663
Q9GZS3	1	1	34.41	0.336196	1.29358	Condition 1	Condition 2	WD repeat-containing protein 61 OS=Homo sapiens GN=WDR61 PE=1 SV=1	6.2143e+06	3.47691e+06	3.87453e+06	4.52192e+06	0.327089	4.3913e+06	3.29303e+06	2.80262e+06	3.49565e+06	0.232716	0.773046	0.464496	0.351731	-0.371374	1.50746
Q9UPT8	1	1	14.28	0.695804	2.35333	Condition 2	Condition 1	Zinc finger CCCH domain-containing protein 4 OS=Homo sapiens GN=ZC3H4 PE=1 SV=3	1.78562e+06	680169	55616.5	840468	1.04236	2.94795e+06	62593.3	2.92316e+06	1.9779e+06	0.838642	2.35333	0.436209	0.352879	1.23471	1.50276
P51572	5	5	212.66	0.353101	1.12573	Condition 1	Condition 2	B-cell receptor-associated protein 31 OS=Homo sapiens GN=BCAP31 PE=1 SV=3	2.01389e+08	2.12189e+08	1.90519e+08	2.01365e+08	0.0538072	1.89159e+08	2.08298e+08	1.39171e+08	1.78876e+08	0.199536	0.888316	0.168752	0.355306	-0.170855	1.49287
P60903	3	3	148.51	0.34987	1.04886	Condition 2	Condition 1	Protein S100-A10 OS=Homo sapiens GN=S100A10 PE=1 SV=2	1.72359e+09	1.64209e+09	1.88487e+09	1.75019e+09	0.070595	1.86414e+09	1.75541e+09	1.88754e+09	1.8357e+09	0.0384092	1.04886	0.491311	0.356591	0.068821	1.48766
Q13404	1	1	153.31	0.364934	1.53456	Condition 2	Condition 1	Ubiquitin-conjugating enzyme E2 variant 1 OS=Homo sapiens GN=UBE2V1 PE=1 SV=2	623953	42473.1	709834	458753	0.7914	536321	669310	906327	703986	0.266233	1.53456	0.420848	0.357241	0.617828	1.48503
P24666	1	1	54.61	0.360951	1.05645	Condition 2	Condition 1	Low molecular weight phosphotyrosine protein phosphatase OS=Homo sapiens GN=ACP1 PE=1 SV=3	9.52432e+06	1.00505e+07	1.04095e+07	9.9948e+06	0.0445458	1.14944e+07	1.02982e+07	9.88431e+06	1.0559e+07	0.079184	1.05645	0.441833	0.360551	0.0792204	1.47173
Q3LXA3	2	2	123.71	0.372397	1.1897	Condition 1	Condition 2	Bifunctional ATP-dependent dihydroxyacetone kinase/FAD-AMP lyase (cyclizing) OS=Homo sapiens GN=DAK PE=1 SV=2	1.00618e+07	1.24084e+07	1.62819e+07	1.29174e+07	0.24317	1.23073e+07	1.08701e+07	9.39568e+06	1.08577e+07	0.134084	0.840551	0.353656	0.361035	-0.250593	1.46979
P16615	7	7	387.97	0.32735	1.09967	Condition 1	Condition 2	Sarcoplasmic/endoplasmic reticulum calcium ATPase 2 OS=Homo sapiens GN=ATP2A2 PE=1 SV=1	7.4873e+07	8.99363e+07	9.79802e+07	8.75965e+07	0.133909	8.05494e+07	7.99716e+07	7.845e+07	7.9657e+07	0.0136143	0.909363	0.0169504	0.361686	-0.137072	1.46719
Q96FJ2	2	1	140.89	0.382049	1.27189	Condition 1	Condition 2	Dynein light chain 2, cytoplasmic OS=Homo sapiens GN=DYNLL2 PE=1 SV=1	1.09404e+07	1.9159e+07	2.10999e+07	1.70664e+07	0.316019	1.34596e+07	1.38981e+07	1.28969e+07	1.34182e+07	0.0374022	0.786232	0.0171694	0.361916	-0.346974	1.46627
P40121	5	5	216.02	0.356142	1.26379	Condition 1	Condition 2	Macrophage-capping protein OS=Homo sapiens GN=CAPG PE=1 SV=2	7.27659e+07	9.78836e+07	6.96812e+07	8.01102e+07	0.1931	6.89646e+07	8.38661e+07	3.73366e+07	6.33891e+07	0.374837	0.791274	0.595371	0.364773	-0.337752	1.45493
O95336	4	4	191.3	0.40711	1.08445	Condition 1	Condition 2	6-phosphogluconolactonase OS=Homo sapiens GN=PGLS PE=1 SV=2	1.08822e+08	1.35559e+08	1.39961e+08	1.28114e+08	0.131536	1.20619e+08	1.1362e+08	1.20171e+08	1.18137e+08	0.0331648	0.922123	0.102567	0.374404	-0.116969	1.41733
P61981	14	9	784.87	0.386422	1.0557	Condition 1	Condition 2	14-3-3 protein gamma OS=Homo sapiens GN=YWHAG PE=1 SV=2	1.22379e+09	1.35105e+09	1.44132e+09	1.33872e+09	0.0816381	1.29636e+09	1.20336e+09	1.30454e+09	1.26809e+09	0.0443236	0.947237	0.418328	0.37584	-0.0782024	1.41181
P08294	4	4	231.31	0.400301	1.13029	Condition 1	Condition 2	Extracellular superoxide dismutase [Cu-Zn] OS=Homo sapiens GN=SOD3 PE=1 SV=2	1.96203e+08	2.7122e+08	2.54649e+08	2.40691e+08	0.163729	2.33241e+08	2.24468e+08	1.81128e+08	2.12946e+08	0.131028	0.884727	0.667815	0.375949	-0.176695	1.41139
O95140	1	1	35.75	0.398425	1.15226	Condition 1	Condition 2	Mitofusin-2 OS=Homo sapiens GN=MFN2 PE=1 SV=3	3.27221e+06	4.02997e+06	5.09253e+06	4.13157e+06	0.221322	3.69263e+06	3.29e+06	3.77428e+06	3.58564e+06	0.0723067	0.867863	0.14882	0.376104	-0.204461	1.4108
Q02818	1	1	27	0.470902	1.23408	Condition 1	Condition 2	Nucleobindin-1 OS=Homo sapiens GN=NUCB1 PE=1 SV=4	4.12512e+06	7.80091e+06	7.65388e+06	6.52663e+06	0.318859	4.65942e+06	5.46446e+06	5.74212e+06	5.28867e+06	0.106331	0.810321	0.136101	0.376196	-0.303435	1.41044
P04233	1	1	30.87	0.359069	1.10007	Condition 1	Condition 2	HLA class II histocompatibility antigen gamma chain OS=Homo sapiens GN=CD74 PE=1 SV=3	9.38326e+06	8.20323e+06	9.69969e+06	9.09539e+06	0.0867111	7.52413e+06	9.66299e+06	7.61685e+06	8.26799e+06	0.146226	0.909031	0.597026	0.377003	-0.137599	1.40735
Q9BRX8	6	6	336.31	0.385484	1.04198	Condition 1	Condition 2	Redox-regulatory protein FAM213A OS=Homo sapiens GN=FAM213A PE=1 SV=3	3.97476e+08	3.66471e+08	4.12313e+08	3.92087e+08	0.0596584	3.65528e+08	3.93304e+08	3.70037e+08	3.7629e+08	0.0396132	0.95971	0.577612	0.379758	-0.0593289	1.39685
P23381	4	4	364.19	0.323399	1.33622	Condition 1	Condition 2	Tryptophan--tRNA ligase, cytoplasmic OS=Homo sapiens GN=WARS PE=1 SV=2	1.115e+08	1.33836e+08	2.27479e+08	1.57605e+08	0.390435	1.20732e+08	1.22546e+08	1.10567e+08	1.17948e+08	0.0547378	0.748378	0.0217769	0.380401	-0.418161	1.39441
P01598	2	2	109.27	0.490431	1.24545	Condition 2	Condition 1	Ig kappa chain V-I region EU OS=Homo sapiens PE=1 SV=1	2.34772e+07	2.0169e+07	2.22539e+07	2.19667e+07	0.0761465	3.38435e+07	3.15869e+07	1.6645e+07	2.73585e+07	0.341632	1.24545	0.0620681	0.381021	0.31667	1.39206
Q3ZCQ8	1	1	98.83	0.418522	1.2223	Condition 1	Condition 2	Mitochondrial import inner membrane translocase subunit TIM50 OS=Homo sapiens GN=TIMM50 PE=1 SV=2	8.15852e+06	4.45911e+06	6.32171e+06	6.31311e+06	0.292997	4.25082e+06	5.82417e+06	5.41981e+06	5.16493e+06	0.158193	0.818128	0.32652	0.381058	-0.289602	1.39192
P31323	10	8	815.43	0.386824	1.05419	Condition 1	Condition 2	cAMP-dependent protein kinase type II-beta regulatory subunit OS=Homo sapiens GN=PRKAR2B PE=1 SV=3	4.00023e+08	4.03e+08	4.67376e+08	4.23466e+08	0.0898684	4.10338e+08	3.963e+08	3.98452e+08	4.01697e+08	0.0188212	0.948592	0.0759376	0.386175	-0.0761408	1.37267
P52907	6	5	262.27	0.380106	1.05499	Condition 2	Condition 1	F-actin-capping protein subunit alpha-1 OS=Homo sapiens GN=CAPZA1 PE=1 SV=3	1.00298e+08	1.09219e+08	1.19345e+08	1.09621e+08	0.0869382	1.2009e+08	1.10179e+08	1.16676e+08	1.15648e+08	0.0435315	1.05499	0.436339	0.387565	0.0772266	1.36749
P50135	1	1	84.3	0.397944	1.09478	Condition 1	Condition 2	Histamine N-methyltransferase OS=Homo sapiens GN=HNMT PE=1 SV=1	3.80926e+07	2.9257e+07	3.31284e+07	3.34927e+07	0.132239	3.23674e+07	3.19253e+07	2.7487e+07	3.05932e+07	0.0882269	0.91343	0.54163	0.387747	-0.130635	1.36681
P29972	1	1	155.82	0.387969	1.07383	Condition 2	Condition 1	Aquaporin-1 OS=Homo sapiens GN=AQP1 PE=1 SV=3	1.66614e+07	1.39124e+07	1.7585e+07	1.60529e+07	0.119008	1.79433e+07	1.61751e+07	1.75961e+07	1.72382e+07	0.0543472	1.07383	0.387719	0.389276	0.10277	1.36114
Q86Y82	3	3	152.24	0.390905	1.10929	Condition 1	Condition 2	Syntaxin-12 OS=Homo sapiens GN=STX12 PE=1 SV=1	3.2441e+07	2.70754e+07	2.4403e+07	2.79731e+07	0.146337	2.85419e+07	2.36531e+07	2.34564e+07	2.52171e+07	0.114248	0.901477	0.662507	0.394278	-0.149637	1.34272
O43491	18	17	895.4	0.399554	1.04445	Condition 1	Condition 2	Band 4.1-like protein 2 OS=Homo sapiens GN=EPB41L2 PE=1 SV=1	3.39495e+08	3.65814e+08	3.84053e+08	3.63121e+08	0.0616894	3.48238e+08	3.64354e+08	3.30409e+08	3.47667e+08	0.048839	0.957442	0.729807	0.394898	-0.0627423	1.34045
Q13867	1	1	23.82	0.418772	1.12844	Condition 1	Condition 2	Bleomycin hydrolase OS=Homo sapiens GN=BLMH PE=1 SV=1	5.70702e+06	7.68087e+06	7.50085e+06	6.96291e+06	0.156738	6.77165e+06	6.67046e+06	5.06907e+06	6.1704e+06	0.15479	0.88618	0.867442	0.397489	-0.174328	1.33101
Q16718	1	1	35.79	0.39311	1.21896	Condition 1	Condition 2	NADH dehydrogenase [ubiquinone] 1 alpha subcomplex subunit 5 OS=Homo sapiens GN=NDUFA5 PE=1 SV=3	5.50922e+06	5.56581e+06	8.75654e+06	6.61052e+06	0.281176	4.22037e+06	6.47137e+06	5.57752e+06	5.42308e+06	0.208999	0.820371	0.542101	0.398291	-0.285651	1.32811
Q12904	1	1	28.23	0.479228	1.26162	Condition 1	Condition 2	Aminoacyl tRNA synthase complex-interacting multifunctional protein 1 OS=Homo sapiens GN=AIMP1 PE=1 SV=2	3.33195e+06	5.64621e+06	7.25631e+06	5.41149e+06	0.364536	4.93682e+06	3.78549e+06	4.14561e+06	4.28931e+06	0.137309	0.79263	0.163684	0.398569	-0.335281	1.3271
Q9BRF8	2	2	87.55	0.444043	1.22822	Condition 2	Condition 1	Calcineurin-like phosphoesterase domain-containing protein 1 OS=Homo sapiens GN=CPPED1 PE=1 SV=3	4.12332e+06	6.41902e+06	5.09242e+06	5.21159e+06	0.221138	7.01586e+06	7.86969e+06	4.31735e+06	6.40097e+06	0.289687	1.22822	0.557303	0.398812	0.296567	1.32622
P05090	1	1	51.87	0.414853	1.09856	Condition 2	Condition 1	Apolipoprotein D OS=Homo sapiens GN=APOD PE=1 SV=1	5.20663e+07	4.94212e+07	5.7448e+07	5.29785e+07	0.0772081	5.81554e+07	4.95435e+07	6.69013e+07	5.82001e+07	0.149123	1.09856	0.363499	0.399246	0.135615	1.32465
Q9Y333	1	1	155.82	0.390198	1.43674	Condition 1	Condition 2	U6 snRNA-associated Sm-like protein LSm2 OS=Homo sapiens GN=LSM2 PE=1 SV=1	8.10641e+06	7.32428e+06	1.73157e+07	1.09155e+07	0.509054	7.29984e+06	1.02626e+07	5.22974e+06	7.59738e+06	0.332953	0.696019	0.343333	0.39983	-0.522801	1.32254
O00748	1	1	17.53	0.310642	2.73452	Condition 2	Condition 1	Cocaine esterase OS=Homo sapiens GN=CES2 PE=1 SV=1	70606.3	56517.1	107207	78110.1	0.334972	79654.9	91956.4	469170	213594	1.03665	2.73452	0.0275425	0.400403	1.45129	1.32048
Q9NPH2	2	2	101.55	0.448359	1.24946	Condition 1	Condition 2	Inositol-3-phosphate synthase 1 OS=Homo sapiens GN=ISYNA1 PE=1 SV=1	1.14303e+07	1.74976e+07	2.27871e+07	1.72383e+07	0.329662	1.06311e+07	1.60441e+07	1.47146e+07	1.37966e+07	0.204461	0.800344	0.395376	0.400619	-0.321307	1.3197
P46459	1	1	21.6	0.38672	1.09874	Condition 1	Condition 2	Vesicle-fusing ATPase OS=Homo sapiens GN=NSF PE=1 SV=3	7.05674e+06	7.46428e+06	8.79383e+06	7.77162e+06	0.116888	6.4568e+06	6.63837e+06	8.12438e+06	7.07318e+06	0.129344	0.91013	0.99291	0.401212	-0.135855	1.31756
P04406	16	16	1354.25	0.392607	1.05268	Condition 2	Condition 1	Glyceraldehyde-3-phosphate dehydrogenase OS=Homo sapiens GN=GAPDH PE=1 SV=3	3.90021e+09	4.27741e+09	4.65826e+09	4.27863e+09	0.0885852	4.66958e+09	4.32584e+09	4.51664e+09	4.50402e+09	0.0382368	1.05268	0.342255	0.401468	0.0740661	1.31664
Q96G03	2	2	73.32	0.387654	1.12073	Condition 1	Condition 2	Phosphoglucomutase-2 OS=Homo sapiens GN=PGM2 PE=1 SV=4	4.64395e+07	4.26524e+07	4.31618e+07	4.40846e+07	0.0466212	4.10524e+07	4.68837e+07	3.0071e+07	3.93357e+07	0.217025	0.892279	0.109573	0.401929	-0.164434	1.31499
P26447	3	3	63.53	0.427134	1.08771	Condition 1	Condition 2	Protein S100-A4 OS=Homo sapiens GN=S100A4 PE=1 SV=1	1.82171e+08	2.14216e+08	2.44933e+08	2.13773e+08	0.146808	1.97013e+08	2.02144e+08	1.90451e+08	1.96536e+08	0.0298207	0.919367	0.0673998	0.402651	-0.121288	1.3124
Q14696	1	1	29.57	0.377395	1.07114	Condition 2	Condition 1	LDLR chaperone MESD OS=Homo sapiens GN=MESDC2 PE=1 SV=2	6.23755e+06	6.47764e+06	7.82456e+06	6.84659e+06	0.124941	7.67167e+06	7.2031e+06	7.12609e+06	7.33362e+06	0.0402638	1.07114	0.212935	0.404018	0.0991407	1.30751
P42566	1	1	69.05	0.36941	1.04849	Condition 1	Condition 2	Epidermal growth factor receptor substrate 15 OS=Homo sapiens GN=EPS15 PE=1 SV=2	4.68688e+06	5.08751e+06	5.46591e+06	5.0801e+06	0.076685	4.78089e+06	4.86121e+06	4.89338e+06	4.84516e+06	0.0119577	0.953753	0.043279	0.406135	-0.0683119	1.29997
Q99460	4	4	216.58	0.414806	1.07453	Condition 1	Condition 2	26S proteasome non-ATPase regulatory subunit 1 OS=Homo sapiens GN=PSMD1 PE=1 SV=2	3.44846e+07	3.76775e+07	4.3521e+07	3.8561e+07	0.118839	3.38377e+07	3.59795e+07	3.78419e+07	3.58864e+07	0.0558353	0.930639	0.321003	0.406742	-0.103707	1.29781
Q9Y624	1	1	42.17	0.384534	1.07595	Condition 2	Condition 1	Junctional adhesion molecule A OS=Homo sapiens GN=F11R PE=1 SV=1	4.5964e+06	4.75986e+06	5.78362e+06	5.04663e+06	0.127505	5.10001e+06	5.45237e+06	5.73732e+06	5.4299e+06	0.0587945	1.07595	0.395058	0.407699	0.105606	1.29442
P50454	7	7	202.7	0.38296	1.07927	Condition 2	Condition 1	Serpin H1 OS=Homo sapiens GN=SERPINH1 PE=1 SV=2	5.88443e+07	6.43333e+07	7.71275e+07	6.67684e+07	0.140511	7.58652e+07	7.00387e+07	7.02794e+07	7.20611e+07	0.0457476	1.07927	0.219808	0.408756	0.110057	1.29069
P10643	4	4	234.35	0.401773	1.07877	Condition 1	Condition 2	Complement component C7 OS=Homo sapiens GN=C7 PE=1 SV=2	3.80373e+07	3.61962e+07	4.12866e+07	3.85067e+07	0.0669349	4.01776e+07	3.60341e+07	3.08729e+07	3.56949e+07	0.130597	0.926978	0.468259	0.412285	-0.109393	1.27829
P46976	1	1	27.1	0.416092	1.06381	Condition 1	Condition 2	Glycogenin-1 OS=Homo sapiens GN=GYG1 PE=1 SV=4	1.80394e+07	1.54394e+07	1.65754e+07	1.66847e+07	0.0781234	1.63912e+07	1.4091e+07	1.65697e+07	1.5684e+07	0.0881442	0.940019	0.94124	0.413228	-0.0892389	1.27499
Q86VP6	12	12	512.68	0.404716	1.04053	Condition 1	Condition 2	Cullin-associated NEDD8-dissociated protein 1 OS=Homo sapiens GN=CAND1 PE=1 SV=2	1.40645e+08	1.29984e+08	1.30723e+08	1.33784e+08	0.0445	1.37603e+08	1.25399e+08	1.22715e+08	1.28573e+08	0.0617173	0.961045	0.720316	0.414323	-0.0573249	1.27117
Q14204	29	29	1452.69	0.354178	1.04686	Condition 2	Condition 1	Cytoplasmic dynein 1 heavy chain 1 OS=Homo sapiens GN=DYNC1H1 PE=1 SV=5	3.88693e+08	4.13001e+08	4.54801e+08	4.18832e+08	0.0798355	4.38787e+08	4.37637e+08	4.38947e+08	4.38457e+08	0.00162936	1.04686	0.000912529	0.416331	0.0660639	1.2642
Q9NR45	1	1	33.9	0.395148	1.17918	Condition 1	Condition 2	Sialic acid synthase OS=Homo sapiens GN=NANS PE=1 SV=2	1.68889e+07	1.19276e+07	1.14101e+07	1.34089e+07	0.225588	1.42073e+07	1.01117e+07	9.79517e+06	1.13714e+07	0.216422	0.84805	0.796585	0.416655	-0.237779	1.26308
P48059	5	5	397.88	0.404774	1.04338	Condition 1	Condition 2	LIM and senescent cell antigen-like-containing domain protein 1 OS=Homo sapiens GN=LIMS1 PE=1 SV=4	1.43275e+08	1.47552e+08	1.51234e+08	1.47354e+08	0.0270298	1.5353e+08	1.38281e+08	1.31868e+08	1.41227e+08	0.07879	0.95842	0.227146	0.419984	-0.0612708	1.2516
P30536	1	1	17.66	0.382206	1.40569	Condition 1	Condition 2	Translocator protein OS=Homo sapiens GN=TSPO PE=1 SV=3	676786	512165	524469	571140	0.160554	486009	69608.7	663301	406306	0.750088	0.711395	0.166031	0.420398	-0.491276	1.25017
P02649	8	8	624.08	0.414493	1.06269	Condition 2	Condition 1	Apolipoprotein E OS=Homo sapiens GN=APOE PE=1 SV=1	1.67482e+08	2.04412e+08	1.87101e+08	1.86332e+08	0.0991601	2.1248e+08	1.94571e+08	1.86989e+08	1.98013e+08	0.0661032	1.06269	0.668321	0.422062	0.087724	1.24447
P00338	10	9	801.67	0.419735	1.04949	Condition 2	Condition 1	L-lactate dehydrogenase A chain OS=Homo sapiens GN=LDHA PE=1 SV=2	1.62945e+09	1.78673e+09	1.90539e+09	1.77386e+09	0.0780328	1.97074e+09	1.84181e+09	1.77241e+09	1.86165e+09	0.0540597	1.04949	0.69164	0.424444	0.0696946	1.23635
P00492	2	2	57.25	0.371636	1.31563	Condition 2	Condition 1	Hypoxanthine-guanine phosphoribosyltransferase OS=Homo sapiens GN=HPRT1 PE=1 SV=2	2.12417e+06	4.93808e+06	7.75089e+06	4.93771e+06	0.56977	5.43275e+06	7.71735e+06	6.33856e+06	6.49622e+06	0.177092	1.31563	0.286517	0.424659	0.395757	1.23562
P13473	1	1	28.78	0.421251	1.07638	Condition 2	Condition 1	Lysosome-associated membrane glycoprotein 2 OS=Homo sapiens GN=LAMP2 PE=1 SV=2	1.37947e+07	1.07996e+07	1.34894e+07	1.26945e+07	0.129835	1.47364e+07	1.31927e+07	1.30632e+07	1.36641e+07	0.0681254	1.07638	0.483678	0.425106	0.106183	1.23411
Q6IAA8	1	1	47	0.382563	1.49896	Condition 1	Condition 2	Ragulator complex protein LAMTOR1 OS=Homo sapiens GN=LAMTOR1 PE=1 SV=2	3.44063e+06	3.44329e+06	8.63767e+06	5.17386e+06	0.579788	3.37819e+06	3.94533e+06	3.03141e+06	3.45164e+06	0.133666	0.66713	0.0462168	0.425275	-0.583959	1.23353
P04433	1	1	37.85	0.44061	1.09071	Condition 2	Condition 1	Ig kappa chain V-III region VG (Fragment) OS=Homo sapiens PE=1 SV=1	1.036e+08	9.20624e+07	1.08459e+08	1.01374e+08	0.0830798	1.09612e+08	9.52056e+07	1.26891e+08	1.1057e+08	0.14348	1.09071	0.439734	0.425306	0.125269	1.23343
P29375	1	1	16.03	0.374064	1.16531	Condition 2	Condition 1	Lysine-specific demethylase 5A OS=Homo sapiens GN=KDM5A PE=1 SV=3	1.13747e+09	1.48242e+09	2.11127e+09	1.57705e+09	0.313082	1.77736e+09	1.7473e+09	1.9886e+09	1.83775e+09	0.071556	1.16531	0.132472	0.426763	0.220712	1.22849
Q9Y3A5	1	1	14.08	0.405042	1.23461	Condition 2	Condition 1	Ribosome maturation protein SBDS OS=Homo sapiens GN=SBDS PE=1 SV=4	1.54422e+06	3.78925e+06	3.06072e+06	2.79807e+06	0.40933	2.89293e+06	4.07572e+06	3.3949e+06	3.45452e+06	0.171846	1.23461	0.423525	0.427892	0.304054	1.22468
Q9H223	6	5	302.72	0.43055	1.045	Condition 2	Condition 1	EH domain-containing protein 4 OS=Homo sapiens GN=EHD4 PE=1 SV=1	7.94753e+07	7.89592e+07	8.42559e+07	8.08968e+07	0.0361013	9.20265e+07	7.9881e+07	8.17038e+07	8.45371e+07	0.0774779	1.045	0.331692	0.42893	0.0635022	1.22119
P46940	25	24	1831.38	0.437694	1.04065	Condition 1	Condition 2	Ras GTPase-activating-like protein IQGAP1 OS=Homo sapiens GN=IQGAP1 PE=1 SV=1	5.90372e+08	6.25553e+08	6.79939e+08	6.31955e+08	0.0714054	6.12706e+08	5.86614e+08	6.22489e+08	6.0727e+08	0.0305386	0.960939	0.288989	0.430309	-0.0574833	1.21655
P01700	2	1	37.85	0.420056	1.11834	Condition 2	Condition 1	Ig lambda chain V-I region HA OS=Homo sapiens PE=1 SV=1	1.22399e+07	1.0128e+07	1.48308e+07	1.23996e+07	0.189962	1.46307e+07	1.19261e+07	1.50442e+07	1.3867e+07	0.122128	1.11834	0.681565	0.430435	0.161365	1.21613
P16284	4	4	161.2	0.438266	1.04139	Condition 1	Condition 2	Platelet endothelial cell adhesion molecule OS=Homo sapiens GN=PECAM1 PE=1 SV=1	2.13929e+07	2.28441e+07	2.45545e+07	2.29305e+07	0.0690159	2.2905e+07	2.19939e+07	2.11588e+07	2.20192e+07	0.0396644	0.960258	0.466922	0.431829	-0.0585057	1.21147
P61106	2	2	49.33	0.411085	1.13349	Condition 2	Condition 1	Ras-related protein Rab-14 OS=Homo sapiens GN=RAB14 PE=1 SV=4	1.87016e+07	2.28192e+07	2.91018e+07	2.35409e+07	0.222486	2.34297e+07	2.62372e+07	3.03833e+07	2.66834e+07	0.131101	1.13349	0.616983	0.436223	0.180775	1.19686
O76074	1	1	13.57	0.497545	1.28144	Condition 1	Condition 2	cGMP-specific 3',5'-cyclic phosphodiesterase OS=Homo sapiens GN=PDE5A PE=1 SV=2	3.78091e+08	1.61642e+08	2.24422e+08	2.54718e+08	0.437188	1.83581e+08	1.91988e+08	2.20758e+08	1.98776e+08	0.0980781	0.780374	0.0594749	0.439715	-0.357762	1.18536
Q9Y2D5	3	3	208.35	0.453801	1.04559	Condition 1	Condition 2	A-kinase anchor protein 2 OS=Homo sapiens GN=AKAP2 PE=1 SV=3	2.63353e+07	2.36294e+07	2.72938e+07	2.57528e+07	0.0737928	2.55797e+07	2.32063e+07	2.51037e+07	2.46299e+07	0.0509805	0.956396	0.607797	0.44128	-0.0643199	1.18023
Q06828	1	1	131.57	0.477582	1.125	Condition 1	Condition 2	Fibromodulin OS=Homo sapiens GN=FMOD PE=1 SV=2	1.1545e+07	1.55197e+07	1.68457e+07	1.46368e+07	0.188461	1.42843e+07	1.08845e+07	1.38626e+07	1.30105e+07	0.14244	0.888888	0.621975	0.444375	-0.169927	1.17015
Q9HBL0	16	14	698.62	0.41861	1.05582	Condition 1	Condition 2	Tensin-1 OS=Homo sapiens GN=TNS1 PE=1 SV=2	3.1944e+08	3.23095e+08	3.37181e+08	3.26572e+08	0.0286839	3.47812e+08	2.83042e+08	2.97069e+08	3.09308e+08	0.110166	0.947135	0.140524	0.445115	-0.0783581	1.16775
P26038	18	13	992.21	0.447065	1.05847	Condition 1	Condition 2	Moesin OS=Homo sapiens GN=MSN PE=1 SV=3	4.99263e+08	5.49816e+08	5.88081e+08	5.4572e+08	0.0816367	5.10094e+08	5.61156e+08	4.75472e+08	5.15574e+08	0.0836042	0.944759	0.967002	0.44703	-0.0819819	1.16156
P45974	5	5	290.52	0.440886	1.07389	Condition 1	Condition 2	Ubiquitin carboxyl-terminal hydrolase 5 OS=Homo sapiens GN=USP5 PE=1 SV=2	4.50742e+07	4.32061e+07	5.08623e+07	4.63809e+07	0.0860673	4.41176e+07	4.78863e+07	3.75653e+07	4.31897e+07	0.120925	0.931197	0.737536	0.447771	-0.102842	1.15917
O60701	1	1	41.26	0.442283	1.23563	Condition 1	Condition 2	UDP-glucose 6-dehydrogenase OS=Homo sapiens GN=UGDH PE=1 SV=1	5.02723e+06	8.36096e+06	5.95717e+06	6.44845e+06	0.266778	6.28994e+06	6.30738e+06	3.0589e+06	5.21874e+06	0.358419	0.809301	0.916494	0.449121	-0.305252	1.15482
P54920	4	4	252.72	0.426903	1.07242	Condition 1	Condition 2	Alpha-soluble NSF attachment protein OS=Homo sapiens GN=NAPA PE=1 SV=3	3.94582e+07	4.26447e+07	4.32688e+07	4.17906e+07	0.0489077	4.48223e+07	3.39276e+07	3.81556e+07	3.89685e+07	0.140952	0.93247	0.243251	0.451168	-0.10087	1.14826
P20073	4	4	367.51	0.442496	1.11343	Condition 1	Condition 2	Annexin A7 OS=Homo sapiens GN=ANXA7 PE=1 SV=3	6.19323e+07	6.84322e+07	8.37844e+07	7.1383e+07	0.157193	6.19615e+07	7.51365e+07	5.52353e+07	6.41111e+07	0.157902	0.898128	0.897416	0.451473	-0.155007	1.14729
Q9NY35	1	1	14.24	0.437163	1.13512	Condition 2	Condition 1	Claudin domain-containing protein 1 OS=Homo sapiens GN=CLDND1 PE=1 SV=1	9.66522e+06	1.55985e+07	1.62872e+07	1.38503e+07	0.262862	1.72874e+07	1.52278e+07	1.46503e+07	1.57218e+07	0.0881707	1.13512	0.253231	0.452152	0.18285	1.14512
Q9HC38	2	2	81.65	0.428907	1.13495	Condition 1	Condition 2	Glyoxalase domain-containing protein 4 OS=Homo sapiens GN=GLOD4 PE=1 SV=1	4.04076e+07	3.53617e+07	5.39704e+07	4.32466e+07	0.222531	3.93931e+07	3.67965e+07	3.81238e+07	3.81045e+07	0.0340758	0.881098	0.0357566	0.452946	-0.182626	1.14259
Q14764	5	5	218.26	0.385381	1.15105	Condition 2	Condition 1	Major vault protein OS=Homo sapiens GN=MVP PE=1 SV=4	3.18262e+07	4.69e+07	5.75189e+07	4.54151e+07	0.28428	5.23286e+07	5.34942e+07	5.10015e+07	5.22748e+07	0.0238581	1.15105	0.0184909	0.45483	0.202944	1.1366
Q6P1Q9	1	1	17.28	0.481381	1.08331	Condition 1	Condition 2	Methyltransferase-like protein 2B OS=Homo sapiens GN=METTL2B PE=1 SV=3	1.23733e+07	1.40199e+07	1.03956e+07	1.2263e+07	0.147981	1.21988e+07	1.11334e+07	1.06275e+07	1.13199e+07	0.0708537	0.923097	0.326848	0.456598	-0.115445	1.131
P28906	1	1	147.58	0.473043	1.12756	Condition 1	Condition 2	Hematopoietic progenitor cell antigen CD34 OS=Homo sapiens GN=CD34 PE=1 SV=2	7.77645e+07	1.11227e+08	1.07289e+08	9.87601e+07	0.185186	1.04666e+08	7.82202e+07	7.98755e+07	8.75873e+07	0.169133	0.886869	0.792329	0.457134	-0.173207	1.12931
O00767	1	1	81.49	0.394989	1.07695	Condition 1	Condition 2	Acyl-CoA desaturase OS=Homo sapiens GN=SCD PE=1 SV=2	1.07674e+07	1.07479e+07	1.10364e+07	1.08506e+07	0.0148585	1.15358e+07	1.00899e+07	8.60024e+06	1.00753e+07	0.145684	0.92855	0.0238418	0.457195	-0.106948	1.12912
P48681	1	1	21.58	0.604166	1.34795	Condition 1	Condition 2	Nestin OS=Homo sapiens GN=NES PE=1 SV=2	248119	624612	782670	551800	0.497667	550642	339039	338406	409362	0.298886	0.741866	0.331262	0.457948	-0.430769	1.12674
Q15121	2	2	106.2	0.445121	1.20311	Condition 1	Condition 2	Astrocytic phosphoprotein PEA-15 OS=Homo sapiens GN=PEA15 PE=1 SV=2	2.01633e+07	2.86493e+07	2.34141e+07	2.40755e+07	0.177836	2.46669e+07	2.41041e+07	1.12623e+07	2.00111e+07	0.378885	0.831179	0.483567	0.464143	-0.266769	1.10736
P27361	4	1	245.57	0.520647	1.12238	Condition 1	Condition 2	Mitogen-activated protein kinase 3 OS=Homo sapiens GN=MAPK3 PE=1 SV=4	1.36064e+07	8.67839e+06	1.19331e+07	1.14059e+07	0.219703	9.18275e+06	1.03055e+07	1.09987e+07	1.01623e+07	0.0901764	0.890967	0.235916	0.46477	-0.166556	1.10541
Q14165	1	1	56.7	0.440884	1.07924	Condition 1	Condition 2	Malectin OS=Homo sapiens GN=MLEC PE=1 SV=1	1.82953e+07	1.54588e+07	1.68342e+07	1.68628e+07	0.0841202	1.82322e+07	1.41646e+07	1.44773e+07	1.56247e+07	0.144869	0.926581	0.56396	0.467106	-0.110012	1.09818
Q14728	1	1	23.99	0.479479	1.04172	Condition 1	Condition 2	Major facilitator superfamily domain-containing protein 10 OS=Homo sapiens GN=MFSD10 PE=2 SV=1	3.93788e+06	4.25509e+06	4.62559e+06	4.27285e+06	0.0805553	4.09853e+06	4.23714e+06	3.96953e+06	4.10173e+06	0.032629	0.959951	0.262664	0.467197	-0.0589673	1.0979
Q9NVZ3	1	1	43.65	0.455024	1.05663	Condition 1	Condition 2	Adaptin ear-binding coat-associated protein 2 OS=Homo sapiens GN=NECAP2 PE=1 SV=1	8.21701e+06	8.16003e+06	9.23833e+06	8.53846e+06	0.0710642	7.89754e+06	7.40482e+06	8.94021e+06	8.08086e+06	0.0970123	0.946407	0.749288	0.46878	-0.0794668	1.09302
P02765	5	5	275.88	0.459215	1.03664	Condition 2	Condition 1	Alpha-2-HS-glycoprotein OS=Homo sapiens GN=AHSG PE=1 SV=1	4.53541e+08	4.14916e+08	4.81135e+08	4.49864e+08	0.073938	4.55871e+08	4.80931e+08	4.62244e+08	4.66349e+08	0.0279281	1.03664	0.26588	0.468883	0.0519201	1.0927
P30086	6	6	686.06	0.467229	1.09646	Condition 1	Condition 2	Phosphatidylethanolamine-binding protein 1 OS=Homo sapiens GN=PEBP1 PE=1 SV=3	5.4923e+08	6.68452e+08	7.79927e+08	6.6587e+08	0.173262	6.22102e+08	5.97056e+08	6.02707e+08	6.07288e+08	0.0216315	0.912023	0.0255985	0.472342	-0.132858	1.0821
P35270	2	2	110.48	0.49749	1.1103	Condition 1	Condition 2	Sepiapterin reductase OS=Homo sapiens GN=SPR PE=1 SV=1	1.42825e+07	2.01893e+07	1.91257e+07	1.78658e+07	0.176228	1.86781e+07	1.53176e+07	1.42772e+07	1.6091e+07	0.142944	0.900656	0.695964	0.474552	-0.150951	1.07536
O60313	2	2	28.93	0.570835	1.17363	Condition 1	Condition 2	Dynamin-like 120 kDa protein, mitochondrial OS=Homo sapiens GN=OPA1 PE=1 SV=3	4.53951e+06	7.07372e+06	8.9019e+06	6.83838e+06	0.320354	5.58029e+06	5.60241e+06	6.29731e+06	5.82667e+06	0.0699776	0.852054	0.0669627	0.475611	-0.230983	1.07215
Q9NR31	1	1	30.26	0.458989	1.07912	Condition 2	Condition 1	GTP-binding protein SAR1a OS=Homo sapiens GN=SAR1A PE=1 SV=1	3.11051e+07	3.90783e+07	4.37641e+07	3.79825e+07	0.168505	4.25906e+07	4.15474e+07	3.88247e+07	4.09876e+07	0.047437	1.07912	0.16898	0.479956	0.109851	1.05903
Q99623	3	3	82.07	0.524391	1.08039	Condition 1	Condition 2	Prohibitin-2 OS=Homo sapiens GN=PHB2 PE=1 SV=2	4.00381e+07	4.92295e+07	5.55526e+07	4.82734e+07	0.161607	4.67337e+07	4.45656e+07	4.27456e+07	4.46816e+07	0.0446839	0.925596	0.122943	0.482904	-0.111546	1.05019
Q8NG66	1	1	14.58	0.435508	1.25671	Condition 2	Condition 1	Serine/threonine-protein kinase Nek11 OS=Homo sapiens GN=NEK11 PE=1 SV=2	774954	2.11548e+06	2.63012e+06	1.84018e+06	0.520455	2.09839e+06	2.00471e+06	2.83465e+06	2.31258e+06	0.196551	1.25671	0.367676	0.483288	0.329656	1.04904
P12236	3	3	67.57	0.490472	1.04662	Condition 1	Condition 2	ADP/ATP translocase 3 OS=Homo sapiens GN=SLC25A6 PE=1 SV=4	7.21347e+07	7.06771e+07	8.34404e+07	7.54174e+07	0.0926343	6.98424e+07	7.53494e+07	7.0982e+07	7.20579e+07	0.0403411	0.955455	0.295158	0.484792	-0.0657406	1.04456
Q00765	1	1	23.69	0.45965	1.06056	Condition 2	Condition 1	Receptor expression-enhancing protein 5 OS=Homo sapiens GN=REEP5 PE=1 SV=3	1.57683e+07	1.66756e+07	1.97449e+07	1.73962e+07	0.119794	1.77422e+07	1.78467e+07	1.97604e+07	1.84498e+07	0.0615862	1.06056	0.458313	0.484895	0.084829	1.04425
P01111	1	1	54.2	0.48473	1.14666	Condition 1	Condition 2	GTPase NRas OS=Homo sapiens GN=NRAS PE=1 SV=1	2.9668e+06	3.41731e+06	4.4189e+06	3.60101e+06	0.206407	2.31115e+06	3.68328e+06	3.42688e+06	3.14044e+06	0.232304	0.8721	0.981346	0.486402	-0.197435	1.03978
O75534	1	1	13.49	0.499246	1.12403	Condition 2	Condition 1	Cold shock domain-containing protein E1 OS=Homo sapiens GN=CSDE1 PE=1 SV=2	2.45844e+06	3.18291e+06	3.21218e+06	2.95117e+06	0.144679	4.14548e+06	2.86363e+06	2.94252e+06	3.31721e+06	0.216563	1.12403	0.522082	0.49031	0.168682	1.02823
P21397	12	10	646.23	0.491621	1.03119	Condition 1	Condition 2	Amine oxidase [flavin-containing] A OS=Homo sapiens GN=MAOA PE=1 SV=1	5.45281e+08	5.32756e+08	5.87234e+08	5.5509e+08	0.0514026	5.54999e+08	5.08794e+08	5.51111e+08	5.38301e+08	0.0476088	0.969755	0.893027	0.490545	-0.0443083	1.02754
O95479	2	2	86.37	0.499608	1.02449	Condition 2	Condition 1	GDH/6PGL endoplasmic bifunctional protein OS=Homo sapiens GN=H6PD PE=1 SV=2	1.3704e+07	1.40303e+07	1.4309e+07	1.40145e+07	0.0216066	1.42682e+07	1.36795e+07	1.51254e+07	1.43577e+07	0.0506444	1.02449	0.295577	0.492419	0.0349059	1.02204
P35221	1	1	22.72	0.462315	1.16236	Condition 2	Condition 1	Catenin alpha-1 OS=Homo sapiens GN=CTNNA1 PE=1 SV=1	3.23996e+06	6.82066e+06	6.48934e+06	5.51665e+06	0.358664	5.73304e+06	6.73453e+06	6.76937e+06	6.41231e+06	0.0917805	1.16236	0.162561	0.494147	0.217052	1.01699
Q01518	7	7	533.53	0.509452	1.03748	Condition 1	Condition 2	Adenylyl cyclase-associated protein 1 OS=Homo sapiens GN=CAP1 PE=1 SV=5	4.08848e+08	4.46072e+08	4.70782e+08	4.41901e+08	0.0705523	4.46042e+08	4.05142e+08	4.26624e+08	4.25936e+08	0.0480326	0.963873	0.602	0.499558	-0.0530846	1.00127
P08729	6	4	361.68	0.493366	1.02868	Condition 2	Condition 1	Keratin, type II cytoskeletal 7 OS=Homo sapiens GN=KRT7 PE=1 SV=5	7.0231e+07	7.60285e+07	7.92328e+07	7.51641e+07	0.0607033	7.7702e+07	7.50094e+07	7.92492e+07	7.73202e+07	0.0277484	1.02868	0.362151	0.500018	0.0408009	0.999948
P08571	1	1	22	0.493224	1.04435	Condition 2	Condition 1	Monocyte differentiation antigen CD14 OS=Homo sapiens GN=CD14 PE=1 SV=2	4.15262e+06	4.55828e+06	4.89667e+06	4.53586e+06	0.0821305	4.50685e+06	4.64377e+06	5.06048e+06	4.73703e+06	0.0608727	1.04435	0.749331	0.500561	0.0626095	0.998383
P10599	3	3	210.95	0.510774	1.07083	Condition 2	Condition 1	Thioredoxin OS=Homo sapiens GN=TXN PE=1 SV=3	2.68343e+08	2.31665e+08	2.55712e+08	2.51907e+08	0.0739672	3.13144e+08	2.47531e+08	2.48576e+08	2.6975e+08	0.139328	1.07083	0.394589	0.502154	0.0987338	0.993799
Q14108	1	1	36.45	0.417161	1.08839	Condition 1	Condition 2	Lysosome membrane protein 2 OS=Homo sapiens GN=SCARB2 PE=1 SV=2	9.25916e+06	8.81137e+06	9.13832e+06	9.06962e+06	0.0255432	1.01123e+07	7.1507e+06	7.73626e+06	8.33309e+06	0.188215	0.918792	0.0427035	0.502403	-0.12219	0.993082
Q95IE3	2	1	106.34	0.433147	1.14654	Condition 2	Condition 1	HLA class II histocompatibility antigen, DRB1-12 beta chain OS=Homo sapiens GN=HLA-DRB1 PE=1 SV=1	3.99171e+06	2.04606e+06	3.37015e+06	3.13598e+06	0.316883	3.6096e+06	3.60386e+06	3.57309e+06	3.59551e+06	0.00546044	1.14654	0.000780359	0.507204	0.197283	0.979363
P01008	12	12	922.46	0.505287	1.02103	Condition 1	Condition 2	Antithrombin-III OS=Homo sapiens GN=SERPINC1 PE=1 SV=1	5.24539e+08	5.10929e+08	5.4611e+08	5.27193e+08	0.0336494	5.13529e+08	4.99058e+08	5.36418e+08	5.16335e+08	0.0364834	0.979405	0.940021	0.507613	-0.0300228	0.978199
P00390	1	1	58.77	0.51587	1.11589	Condition 2	Condition 1	Glutathione reductase, mitochondrial OS=Homo sapiens GN=GSR PE=1 SV=2	2.58059e+07	1.83543e+07	2.00182e+07	2.13928e+07	0.182836	2.78831e+07	2.46763e+07	1.90564e+07	2.38719e+07	0.187167	1.11589	0.867721	0.509632	0.15819	0.972472
P62316	1	1	31.24	0.629982	1.21092	Condition 1	Condition 2	Small nuclear ribonucleoprotein Sm D2 OS=Homo sapiens GN=SNRPD2 PE=1 SV=1	3.19283e+06	5.7078e+06	7.52178e+06	5.47414e+06	0.397124	3.81962e+06	5.2651e+06	4.47717e+06	4.52063e+06	0.160092	0.825816	0.199543	0.510905	-0.276108	0.968873
Q9UMS4	1	1	18.81	0.408491	1.19261	Condition 1	Condition 2	Pre-mRNA-processing factor 19 OS=Homo sapiens GN=PRPF19 PE=1 SV=1	4.2648e+06	3.31759e+06	4.05763e+06	3.88e+06	0.12834	4.88251e+06	2.2621e+06	2.61547e+06	3.25336e+06	0.437058	0.838494	0.218492	0.511117	-0.254127	0.968274
P62834	5	1	341.56	0.540303	1.0525	Condition 2	Condition 1	Ras-related protein Rap-1A OS=Homo sapiens GN=RAP1A PE=1 SV=1	3.00097e+07	3.07276e+07	3.20539e+07	3.09304e+07	0.0335285	3.63087e+07	2.87383e+07	3.26154e+07	3.25541e+07	0.116286	1.0525	0.139616	0.513282	0.0738146	0.962176
P02656	1	1	219.08	0.504685	1.04139	Condition 1	Condition 2	Apolipoprotein C-III OS=Homo sapiens GN=APOC3 PE=1 SV=1	2.86194e+08	2.94689e+08	3.23986e+08	3.01623e+08	0.0657338	2.80814e+08	2.74328e+08	3.13763e+08	2.89635e+08	0.0730087	0.960256	0.935679	0.513401	-0.0585095	0.961843
Q13423	6	6	189.48	0.491184	1.04171	Condition 1	Condition 2	NAD(P) transhydrogenase, mitochondrial OS=Homo sapiens GN=NNT PE=1 SV=3	8.88159e+07	9.16131e+07	9.65788e+07	9.23359e+07	0.0425796	9.78649e+07	8.48507e+07	8.31997e+07	8.86384e+07	0.0906255	0.959956	0.386514	0.513522	-0.0589596	0.961502
P51452	1	1	76.66	0.50756	1.04428	Condition 2	Condition 1	Dual specificity protein phosphatase 3 OS=Homo sapiens GN=DUSP3 PE=1 SV=1	1.30064e+07	1.28872e+07	1.4798e+07	1.35639e+07	0.0789186	1.52591e+07	1.33027e+07	1.39317e+07	1.41645e+07	0.0705125	1.04428	0.930812	0.516588	0.0625092	0.952915
O75146	1	1	13.63	0.556959	1.2326	Condition 1	Condition 2	Huntingtin-interacting protein 1-related protein OS=Homo sapiens GN=HIP1R PE=1 SV=2	2.97048e+06	6.55412e+06	5.1245e+06	4.88303e+06	0.369439	3.86767e+06	5.34504e+06	2.67199e+06	3.96157e+06	0.337997	0.811293	0.710451	0.516675	-0.301705	0.952671
Q15435	3	3	81.97	0.558671	1.08244	Condition 1	Condition 2	Protein phosphatase 1 regulatory subunit 7 OS=Homo sapiens GN=PPP1R7 PE=1 SV=1	1.72116e+07	2.29655e+07	2.33235e+07	2.11669e+07	0.162046	2.13079e+07	1.99032e+07	1.74534e+07	1.95548e+07	0.0997566	0.92384	0.48879	0.518235	-0.114285	0.948322
Q07837	1	1	22.65	0.494595	1.13509	Condition 1	Condition 2	Neutral and basic amino acid transport protein rBAT OS=Homo sapiens GN=SLC3A1 PE=1 SV=2	3.45218e+07	4.48424e+07	4.19131e+07	4.04258e+07	0.131565	3.93606e+07	4.38506e+07	2.36329e+07	3.56147e+07	0.298096	0.880989	0.401243	0.521506	-0.182803	0.939244
Q10567	5	1	135.27	0.446874	1.17003	Condition 2	Condition 1	AP-1 complex subunit beta-1 OS=Homo sapiens GN=AP1B1 PE=1 SV=2	2.40967e+06	3.78896e+06	5.57907e+06	3.9259e+06	0.404781	4.05719e+06	4.78268e+06	4.94038e+06	4.59342e+06	0.102546	1.17003	0.161528	0.523877	0.226544	0.932699
O43617	1	1	19.7	0.457399	1.15529	Condition 2	Condition 1	Trafficking protein particle complex subunit 3 OS=Homo sapiens GN=TRAPPC3 PE=1 SV=1	2.75106e+06	5.57701e+06	5.56911e+06	4.63239e+06	0.351716	5.21994e+06	5.2366e+06	5.59869e+06	5.35174e+06	0.039992	1.15529	0.0339266	0.525191	0.208251	0.929087
P02743	5	5	255.14	0.522057	1.02727	Condition 2	Condition 1	Serum amyloid P-component OS=Homo sapiens GN=APCS PE=1 SV=2	2.11434e+08	2.02652e+08	2.23154e+08	2.12413e+08	0.0484239	2.10809e+08	2.14041e+08	2.29768e+08	2.18206e+08	0.0464805	1.02727	0.985948	0.525546	0.0388178	0.928112
Q13418	7	7	263.11	0.507128	1.07073	Condition 1	Condition 2	Integrin-linked protein kinase OS=Homo sapiens GN=ILK PE=1 SV=2	1.97001e+08	2.02486e+08	2.56477e+08	2.18655e+08	0.150327	2.07312e+08	2.01677e+08	2.03644e+08	2.04211e+08	0.0140046	0.933942	0.0150267	0.526447	-0.0985945	0.925639
Q9Y3Z3	4	4	155.14	0.462407	1.13411	Condition 2	Condition 1	SAM domain and HD domain-containing protein 1 OS=Homo sapiens GN=SAMHD1 PE=1 SV=2	3.24364e+07	5.84107e+07	5.93071e+07	5.00514e+07	0.304919	5.75236e+07	5.46435e+07	5.8124e+07	5.67637e+07	0.0327759	1.13411	0.0292868	0.526486	0.181559	0.925532
Q9ULV4	4	4	112.8	0.568769	1.0633	Condition 2	Condition 1	Coronin-1C OS=Homo sapiens GN=CORO1C PE=1 SV=1	3.0212e+07	2.77902e+07	3.17899e+07	2.99307e+07	0.0673091	3.41912e+07	3.44491e+07	2.68358e+07	3.18254e+07	0.135836	1.0633	0.356849	0.529231	0.0885524	0.918031
Q05655	1	1	41.26	0.519894	1.07828	Condition 1	Condition 2	Protein kinase C delta type OS=Homo sapiens GN=PRKCD PE=1 SV=2	7.64164e+06	6.04473e+06	6.11892e+06	6.60176e+06	0.136527	7.02288e+06	5.46706e+06	5.87759e+06	6.12251e+06	0.131695	0.927405	0.88906	0.530181	-0.108728	0.915442
P09917	1	1	35.54	0.36754	1.27453	Condition 2	Condition 1	Arachidonate 5-lipoxygenase OS=Homo sapiens GN=ALOX5 PE=1 SV=2	2.48966e+06	949185	777651	1.4055e+06	0.670809	1.54767e+06	2.04484e+06	1.78154e+06	1.79135e+06	0.138853	1.27453	0.130143	0.530752	0.349965	0.91389
P55899	2	2	34.76	0.449292	1.15262	Condition 2	Condition 1	IgG receptor FcRn large subunit p51 OS=Homo sapiens GN=FCGRT PE=1 SV=1	8.44637e+06	1.47021e+07	1.7962e+07	1.37035e+07	0.352887	1.59033e+07	1.53438e+07	1.61378e+07	1.5795e+07	0.0258244	1.15262	0.0141291	0.53226	0.20492	0.909797
Q9H3N1	1	1	22.57	0.474591	1.2073	Condition 2	Condition 1	Thioredoxin-related transmembrane protein 1 OS=Homo sapiens GN=TMX1 PE=1 SV=1	243243	745078	666391	551571	0.489335	790264	591363	616103	665910	0.162788	1.2073	0.277808	0.533318	0.271781	0.906932
P61086	1	1	39.22	0.436966	1.13331	Condition 1	Condition 2	Ubiquitin-conjugating enzyme E2 K OS=Homo sapiens GN=UBE2K PE=1 SV=3	1.05831e+07	1.05345e+07	9.83862e+06	1.03187e+07	0.0403647	1.20667e+07	6.46081e+06	8.78738e+06	9.10498e+06	0.309328	0.882372	0.0428052	0.534341	-0.18054	0.904167
Q14183	1	1	15.17	0.558968	1.10212	Condition 2	Condition 1	Double C2-like domain-containing protein alpha OS=Homo sapiens GN=DOC2A PE=1 SV=5	1.38194e+07	1.52797e+07	1.82534e+07	1.57842e+07	0.14316	1.69153e+07	2.1135e+07	1.4138e+07	1.73961e+07	0.202528	1.10212	0.582918	0.541248	0.140288	0.885638
Q71U36	15	6	1577.99	0.592789	1.09823	Condition 1	Condition 2	Tubulin alpha-1A chain OS=Homo sapiens GN=TUBA1A PE=1 SV=1	1.76645e+09	2.11034e+09	2.76305e+09	2.21328e+09	0.228714	2.11892e+09	1.90556e+09	2.02148e+09	2.01532e+09	0.0530005	0.910559	0.0852512	0.543735	-0.135176	0.879025
P62993	2	2	66.01	0.561932	1.048	Condition 1	Condition 2	Growth factor receptor-bound protein 2 OS=Homo sapiens GN=GRB2 PE=1 SV=1	2.5531e+07	2.0708e+07	2.16586e+07	2.26325e+07	0.112878	2.23736e+07	2.18998e+07	2.05143e+07	2.15959e+07	0.0447396	0.954196	0.250271	0.546838	-0.0676417	0.870816
P30043	5	5	713.49	0.562005	1.04057	Condition 1	Condition 2	Flavin reductase (NADPH) OS=Homo sapiens GN=BLVRB PE=1 SV=3	9.51508e+08	8.31108e+08	9.77853e+08	9.20156e+08	0.0850232	9.42226e+08	8.72822e+08	8.37785e+08	8.84278e+08	0.0601111	0.961008	0.631658	0.547046	-0.0573799	0.870267
Q14CZ8	1	1	13.19	0.931145	1.3456	Condition 1	Condition 2	Hepatocyte cell adhesion molecule OS=Homo sapiens GN=HEPACAM PE=1 SV=1	5.15818e+06	909730	5.28551e+06	3.78447e+06	0.658061	2.50506e+06	3.60094e+06	2.33145e+06	2.81248e+06	0.244735	0.743164	0.141935	0.550215	-0.428248	0.861932
P09382	7	7	538.49	0.506089	1.01662	Condition 2	Condition 1	Galectin-1 OS=Homo sapiens GN=LGALS1 PE=1 SV=2	1.34474e+09	1.37541e+09	1.45401e+09	1.39139e+09	0.0405086	1.40957e+09	1.42056e+09	1.4134e+09	1.41451e+09	0.00394609	1.01662	0.0194243	0.551554	0.0237785	0.858426
Q9BXA7	1	1	23.53	0.643202	1.11662	Condition 2	Condition 1	Testis-specific serine/threonine-protein kinase 1 OS=Homo sapiens GN=TSSK1B PE=1 SV=1	2.25716e+08	1.88914e+08	2.10318e+08	2.08316e+08	0.0887233	2.8673e+08	2.46464e+08	1.64638e+08	2.3261e+08	0.267459	1.11662	0.162198	0.552093	0.159142	0.857016
P69891	8	6	860.72	0.538444	1.0319	Condition 2	Condition 1	Hemoglobin subunit gamma-1 OS=Homo sapiens GN=HBG1 PE=1 SV=2	9.54365e+08	1.10105e+09	9.95343e+08	1.01692e+09	0.0744237	1.07165e+09	1.00023e+09	1.07621e+09	1.04936e+09	0.0406055	1.0319	0.481369	0.552905	0.0453065	0.854896
P00403	2	2	83.12	0.486377	1.09658	Condition 2	Condition 1	Cytochrome c oxidase subunit 2 OS=Homo sapiens GN=MT-CO2 PE=1 SV=1	4.69388e+07	6.84515e+07	7.59884e+07	6.37929e+07	0.236307	7.01049e+07	7.14062e+07	6.83509e+07	6.9954e+07	0.0219177	1.09658	0.0204777	0.552933	0.133012	0.854824
Q13576	3	2	46.27	0.518651	1.135	Condition 2	Condition 1	Ras GTPase-activating-like protein IQGAP2 OS=Homo sapiens GN=IQGAP2 PE=1 SV=4	5.74905e+06	5.8411e+06	9.03388e+06	6.87468e+06	0.272084	7.21529e+06	9.69822e+06	6.49474e+06	7.80275e+06	0.215385	1.135	0.893355	0.557429	0.18269	0.843141
P60900	2	2	128.24	0.651247	1.14836	Condition 1	Condition 2	Proteasome subunit alpha type-6 OS=Homo sapiens GN=PSMA6 PE=1 SV=1	2.19416e+07	3.62148e+07	4.33004e+07	3.38189e+07	0.321686	2.82982e+07	3.02907e+07	2.976e+07	2.94497e+07	0.0350383	0.870804	0.0178321	0.559108	-0.19958	0.838801
P00747	13	13	530.78	0.587541	1.04148	Condition 1	Condition 2	Plasminogen OS=Homo sapiens GN=PLG PE=1 SV=2	2.37653e+08	2.7586e+08	2.88249e+08	2.67254e+08	0.0986806	2.60749e+08	2.66116e+08	2.42964e+08	2.5661e+08	0.0472244	0.960171	0.348661	0.559803	-0.0586361	0.837008
Q6UX71	1	1	37.89	0.592888	1.05424	Condition 2	Condition 1	Plexin domain-containing protein 2 OS=Homo sapiens GN=PLXDC2 PE=1 SV=1	2.37662e+06	2.49957e+06	2.74124e+06	2.53914e+06	0.0730556	2.90783e+06	2.29911e+06	2.82367e+06	2.67687e+06	0.12322	1.05424	0.480563	0.562677	0.0762039	0.829622
O14579	3	3	117.39	0.612068	1.05738	Condition 1	Condition 2	Coatomer subunit epsilon OS=Homo sapiens GN=COPE PE=1 SV=3	1.30117e+07	1.59603e+07	1.73404e+07	1.54375e+07	0.143239	1.49057e+07	1.37755e+07	1.5118e+07	1.45997e+07	0.0494289	0.945734	0.192511	0.566567	-0.0804929	0.819681
Q6UXS9	1	1	16.77	0.535742	1.10925	Condition 2	Condition 1	Inactive caspase-12 OS=Homo sapiens GN=CASP12 PE=2 SV=2	6.3184e+09	4.30983e+09	4.22927e+09	4.9525e+09	0.238989	6.39245e+09	5.56225e+09	4.52598e+09	5.49356e+09	0.170223	1.10925	0.768646	0.568075	0.149584	0.815848
O43776	2	2	95.38	0.578536	1.03099	Condition 1	Condition 2	Asparagine--tRNA ligase, cytoplasmic OS=Homo sapiens GN=NARS PE=1 SV=1	3.06561e+07	3.30136e+07	3.53881e+07	3.30193e+07	0.0716544	3.36499e+07	3.08842e+07	3.1546e+07	3.20267e+07	0.0450907	0.96994	0.542852	0.568706	-0.0440322	0.814245
P24534	1	1	155.82	0.621567	1.16281	Condition 1	Condition 2	Elongation factor 1-beta OS=Homo sapiens GN=EEF1B2 PE=1 SV=3	5.29219e+07	6.92037e+07	1.05251e+08	7.57923e+07	0.353329	6.58845e+07	7.75679e+07	5.20889e+07	6.51804e+07	0.195674	0.859988	0.369776	0.569032	-0.217612	0.813417
Q9ULI4	1	1	36.07	0.441616	1.17368	Condition 2	Condition 1	Kinesin-like protein KIF26A OS=Homo sapiens GN=KIF26A PE=1 SV=3	4.4318e+07	4.70791e+07	9.54803e+07	6.22925e+07	0.461929	6.94157e+07	6.60457e+07	8.38723e+07	7.31112e+07	0.129535	1.17368	0.195473	0.569679	0.231036	0.811778
O75626	1	1	32.01	0.423329	1.24229	Condition 2	Condition 1	PR domain zinc finger protein 1 OS=Homo sapiens GN=PRDM1 PE=1 SV=2	2.76216e+07	5.39892e+07	1.08567e+08	6.33925e+07	0.651239	7.55203e+07	9.21165e+07	6.86185e+07	7.87518e+07	0.153364	1.24229	0.15768	0.569744	0.313	0.811614
Q13442	1	1	60.46	0.571218	1.03459	Condition 2	Condition 1	28 kDa heat- and acid-stable phosphoprotein OS=Homo sapiens GN=PDAP1 PE=1 SV=1	7.7948e+06	6.71866e+06	7.57072e+06	7.36139e+06	0.0771301	8.10929e+06	7.22803e+06	7.51083e+06	7.61605e+06	0.05908	1.03459	0.771512	0.575514	0.049064	0.797077
P53004	3	3	123.74	0.662039	1.19159	Condition 2	Condition 1	Biliverdin reductase A OS=Homo sapiens GN=BLVRA PE=1 SV=2	1.03759e+08	8.65891e+07	9.02595e+07	9.3536e+07	0.0966668	1.69694e+08	8.13628e+07	8.3314e+07	1.11457e+08	0.452588	1.19159	0.0622572	0.577414	0.252892	0.792322
A6NL28	4	1	208.22	0.582796	1.0277	Condition 2	Condition 1	Putative tropomyosin alpha-3 chain-like protein OS=Homo sapiens PE=5 SV=2	1.01861e+08	1.09342e+08	1.13829e+08	1.08344e+08	0.0558035	1.16168e+08	1.04424e+08	1.13443e+08	1.11345e+08	0.055207	1.0277	0.983427	0.579128	0.039416	0.788046
P36578	4	4	148.83	0.693049	1.1013	Condition 1	Condition 2	60S ribosomal protein L4 OS=Homo sapiens GN=RPL4 PE=1 SV=5	3.85556e+07	6.10729e+07	6.53212e+07	5.49832e+07	0.261615	5.247e+07	4.68466e+07	5.04603e+07	4.99256e+07	0.0570763	0.908015	0.0755239	0.582422	-0.139212	0.779862
Q9NZM1	3	3	196.77	0.544974	1.06262	Condition 2	Condition 1	Myoferlin OS=Homo sapiens GN=MYOF PE=1 SV=1	2.55758e+07	1.89326e+07	2.05277e+07	2.16787e+07	0.159969	2.50543e+07	2.26848e+07	2.13698e+07	2.30363e+07	0.0810545	1.06262	0.449486	0.582645	0.0876314	0.779312
O60888	1	1	19.57	0.644681	1.12077	Condition 1	Condition 2	Protein CutA OS=Homo sapiens GN=CUTA PE=1 SV=2	1.57188e+07	2.76437e+07	2.36207e+07	2.23277e+07	0.27171	1.76049e+07	1.82642e+07	2.38964e+07	1.99219e+07	0.17357	0.892247	0.490415	0.582805	-0.164485	0.778915
O43242	1	1	53.01	0.595405	1.06873	Condition 1	Condition 2	26S proteasome non-ATPase regulatory subunit 3 OS=Homo sapiens GN=PSMD3 PE=1 SV=2	1.29244e+07	9.52424e+06	1.10562e+07	1.11683e+07	0.152474	1.18387e+07	9.83017e+06	9.68121e+06	1.045e+07	0.115305	0.935688	0.667278	0.583042	-0.0959003	0.778327
Q8NB37	1	1	79.14	0.601631	1.18386	Condition 1	Condition 2	Parkinson disease 7 domain-containing protein 1 OS=Homo sapiens GN=PDDC1 PE=1 SV=1	3.61958e+06	3.69199e+06	6.83952e+06	4.71703e+06	0.389756	3.69075e+06	5.1802e+06	3.0824e+06	3.98445e+06	0.270878	0.844694	0.51261	0.583756	-0.243499	0.776562
Q8IZ83	2	2	86.9	0.557855	1.07873	Condition 1	Condition 2	Aldehyde dehydrogenase family 16 member A1 OS=Homo sapiens GN=ALDH16A1 PE=1 SV=2	1.19055e+07	1.21292e+07	1.01919e+07	1.14089e+07	0.0928998	1.12208e+07	1.23745e+07	8.13339e+06	1.05762e+07	0.207333	0.927017	0.378761	0.585598	-0.109332	0.772018
P49755	3	3	168.85	0.650728	1.06831	Condition 1	Condition 2	Transmembrane emp24 domain-containing protein 10 OS=Homo sapiens GN=TMED10 PE=1 SV=2	4.66723e+07	6.27826e+07	6.6217e+07	5.85573e+07	0.178201	5.84464e+07	5.17035e+07	5.42887e+07	5.48129e+07	0.0620642	0.936055	0.192144	0.586353	-0.0953348	0.770159
P35241	7	2	516.17	0.669745	1.13636	Condition 1	Condition 2	Radixin OS=Homo sapiens GN=RDX PE=1 SV=1	1.27144e+07	1.58402e+07	2.45866e+07	1.77137e+07	0.347406	1.46257e+07	1.66559e+07	1.54826e+07	1.55881e+07	0.065386	0.88	0.0533996	0.586762	-0.184425	0.769152
P27824	8	8	532.95	0.566463	1.03938	Condition 2	Condition 1	Calnexin OS=Homo sapiens GN=CANX PE=1 SV=2	3.96827e+08	4.44542e+08	4.90307e+08	4.43892e+08	0.105303	4.86338e+08	4.49924e+08	4.47859e+08	4.61374e+08	0.0469137	1.03938	0.353124	0.588245	0.0557262	0.76551
P07237	18	18	893.16	0.612392	1.04834	Condition 1	Condition 2	Protein disulfide-isomerase OS=Homo sapiens GN=P4HB PE=1 SV=3	7.67119e+08	9.20283e+08	9.48355e+08	8.78585e+08	0.111029	8.73633e+08	8.8279e+08	7.57788e+08	8.3807e+08	0.08314	0.953886	0.675675	0.589725	-0.0681109	0.761886
P57088	1	1	89.7	0.779023	1.20754	Condition 1	Condition 2	Transmembrane protein 33 OS=Homo sapiens GN=TMEM33 PE=1 SV=2	1.5354e+06	3.67516e+06	4.5676e+06	3.25939e+06	0.478088	3.28292e+06	2.74416e+06	2.07053e+06	2.6992e+06	0.225047	0.828132	0.263829	0.592933	-0.272068	0.754059
P21281	1	1	32.3	0.565929	1.03825	Condition 2	Condition 1	V-type proton ATPase subunit B, brain isoform OS=Homo sapiens GN=ATP6V1B2 PE=1 SV=3	7.04451e+06	7.99198e+06	8.80931e+06	7.9486e+06	0.111114	8.207e+06	8.48405e+06	8.06689e+06	8.25265e+06	0.0257245	1.03825	0.109244	0.593166	0.0541561	0.753491
P62244	1	1	23.17	0.613433	1.0396	Condition 1	Condition 2	40S ribosomal protein S15a OS=Homo sapiens GN=RPS15A PE=1 SV=2	1.42045e+07	1.66231e+07	1.68428e+07	1.58901e+07	0.0921287	1.55673e+07	1.40865e+07	1.6201e+07	1.52849e+07	0.0709955	0.961912	0.709234	0.595924	-0.0560238	0.746799
Q9BX84	1	1	17.84	0.610035	1.16142	Condition 2	Condition 1	Transient receptor potential cation channel subfamily M member 6 OS=Homo sapiens GN=TRPM6 PE=1 SV=2	3.04924e+07	1.69723e+07	1.92352e+07	2.22333e+07	0.325707	3.29447e+07	2.74485e+07	1.70735e+07	2.58222e+07	0.312117	1.16142	0.893381	0.596877	0.215891	0.744495
Q8NEZ4	1	1	19.97	0.608651	1.07408	Condition 2	Condition 1	Histone-lysine N-methyltransferase MLL3 OS=Homo sapiens GN=MLL3 PE=1 SV=3	7.70239e+07	9.48468e+07	1.02624e+08	9.14983e+07	0.143439	9.59197e+07	1.15231e+08	8.36771e+07	9.82761e+07	0.161876	1.07408	0.809959	0.599644	0.103096	0.737821
P80748	2	1	140.29	0.705197	1.26817	Condition 1	Condition 2	Ig lambda chain V-III region LOI OS=Homo sapiens PE=1 SV=1	6.61477e+06	1.80462e+07	7.00817e+06	1.05564e+07	0.614733	8.5239e+06	1.02671e+07	6.18135e+06	8.32412e+06	0.246295	0.788539	0.181508	0.600323	-0.342745	0.736188
Q9P0L0	2	2	140.05	0.562211	1.0725	Condition 2	Condition 1	Vesicle-associated membrane protein-associated protein A OS=Homo sapiens GN=VAPA PE=1 SV=3	4.608e+07	6.4078e+07	7.18476e+07	6.06685e+07	0.21787	6.7946e+07	6.13583e+07	6.58974e+07	6.50672e+07	0.0518142	1.0725	0.122168	0.60628	0.100982	0.721945
O94911	1	1	106.75	0.640733	1.07503	Condition 1	Condition 2	ATP-binding cassette sub-family A member 8 OS=Homo sapiens GN=ABCA8 PE=1 SV=3	9.69768e+06	1.00484e+07	7.1397e+06	8.96192e+06	0.177172	9.58697e+06	7.38734e+06	8.03507e+06	8.33646e+06	0.135593	0.930209	0.672693	0.607953	-0.104374	0.717968
P18124	2	2	97.33	0.559626	1.09297	Condition 1	Condition 2	60S ribosomal protein L7 OS=Homo sapiens GN=RPL7 PE=1 SV=1	3.61913e+07	4.07856e+07	4.12222e+07	3.93997e+07	0.0707393	3.93788e+07	4.42734e+07	2.44929e+07	3.60484e+07	0.285789	0.91494	0.136396	0.615412	-0.128251	0.700375
P61163	3	2	189.17	0.595857	1.07195	Condition 2	Condition 1	Alpha-centractin OS=Homo sapiens GN=ACTR1A PE=1 SV=1	5.45908e+07	7.36404e+07	8.13062e+07	6.98458e+07	0.196948	6.51921e+07	7.9649e+07	7.97727e+07	7.48712e+07	0.111961	1.07195	0.54158	0.617642	0.100238	0.695158
P00488	11	11	836.37	0.582868	1.06926	Condition 2	Condition 1	Coagulation factor XIII A chain OS=Homo sapiens GN=F13A1 PE=1 SV=4	4.67624e+08	6.30441e+08	7.06251e+08	6.01439e+08	0.202728	6.55506e+08	6.90385e+08	5.83388e+08	6.43093e+08	0.0848526	1.06926	0.333742	0.617795	0.09661	0.694801
Q9H993	1	1	52.97	0.657054	1.07711	Condition 1	Condition 2	UPF0364 protein C6orf211 OS=Homo sapiens GN=C6orf211 PE=1 SV=1	2.18565e+06	2.84372e+06	3.26169e+06	2.76369e+06	0.196282	2.93494e+06	2.46709e+06	2.29546e+06	2.56583e+06	0.128995	0.928408	0.542564	0.618303	-0.107169	0.693615
O94919	1	1	42.88	0.633332	1.06211	Condition 2	Condition 1	Endonuclease domain-containing 1 protein OS=Homo sapiens GN=ENDOD1 PE=1 SV=2	5.00529e+06	4.9075e+06	5.91431e+06	5.2757e+06	0.105239	5.17974e+06	4.98682e+06	6.64355e+06	5.60337e+06	0.161683	1.06211	0.546054	0.621564	0.086931	0.686024
Q15631	2	2	82.97	0.552635	1.09204	Condition 2	Condition 1	Translin OS=Homo sapiens GN=TSN PE=1 SV=1	1.4802e+07	2.09118e+07	2.68112e+07	2.08416e+07	0.28812	2.41085e+07	2.33291e+07	2.08421e+07	2.27599e+07	0.0749556	1.09204	0.149368	0.622754	0.127024	0.683266
P61158	6	6	325.47	0.611757	1.04257	Condition 2	Condition 1	Actin-related protein 3 OS=Homo sapiens GN=ACTR3 PE=1 SV=3	1.20846e+08	1.48386e+08	1.49025e+08	1.39419e+08	0.115395	1.57522e+08	1.36907e+08	1.41634e+08	1.45354e+08	0.0742997	1.04257	0.621278	0.623836	0.0601448	0.68076
Q8WVM8	4	4	133.17	0.668999	1.04721	Condition 1	Condition 2	Sec1 family domain-containing protein 1 OS=Homo sapiens GN=SCFD1 PE=1 SV=4	1.45968e+07	1.83269e+07	1.89097e+07	1.72778e+07	0.135437	1.7594e+07	1.62914e+07	1.56113e+07	1.64989e+07	0.061066	0.954919	0.312776	0.624465	-0.0665497	0.679306
O95674	1	1	76.75	0.608921	1.05423	Condition 2	Condition 1	Phosphatidate cytidylyltransferase 2 OS=Homo sapiens GN=CDS2 PE=1 SV=1	1.13217e+07	1.50124e+07	1.53781e+07	1.39041e+07	0.161383	1.55544e+07	1.50418e+07	1.33782e+07	1.46581e+07	0.0776161	1.05423	0.409005	0.631056	0.0761954	0.664159
Q02930	1	1	14.11	0.757096	1.15175	Condition 1	Condition 2	Cyclic AMP-responsive element-binding protein 5 OS=Homo sapiens GN=CREB5 PE=1 SV=3	5.5065e+06	1.031e+07	1.31062e+07	9.64089e+06	0.398694	6.3083e+06	9.12943e+06	9.67411e+06	8.37061e+06	0.215834	0.868241	0.361896	0.63177	-0.203833	0.66253
Q2KJY2	1	1	22.96	0.495575	1.24685	Condition 1	Condition 2	Kinesin-like protein KIF26B OS=Homo sapiens GN=KIF26B PE=1 SV=1	5.28712e+08	7.69993e+08	4.09413e+08	5.69373e+08	0.322629	6.16571e+08	6.75912e+08	7.74626e+07	4.56648e+08	0.722048	0.80202	0.473734	0.632247	-0.318289	0.661441
P68366	12	3	1146.61	0.659475	1.09167	Condition 1	Condition 2	Tubulin alpha-4A chain OS=Homo sapiens GN=TUBA4A PE=1 SV=1	4.18452e+07	5.15815e+07	6.64291e+07	5.32853e+07	0.232338	4.98433e+07	5.67859e+07	3.98034e+07	4.88109e+07	0.174925	0.916029	0.644657	0.6335	-0.126534	0.658583
P61160	3	3	112.42	0.619764	1.03847	Condition 2	Condition 1	Actin-related protein 2 OS=Homo sapiens GN=ACTR2 PE=1 SV=1	6.69933e+07	7.04589e+07	8.13201e+07	7.29241e+07	0.1025	7.51848e+07	7.0196e+07	8.18085e+07	7.57297e+07	0.0769236	1.03847	0.755738	0.635121	0.0544639	0.654896
P60709	16	8	1781.34	0.659912	1.03338	Condition 1	Condition 2	Actin, cytoplasmic 1 OS=Homo sapiens GN=ACTB PE=1 SV=1	7.25658e+09	8.63514e+09	8.54334e+09	8.14502e+09	0.0946321	7.5701e+09	8.39344e+09	7.6823e+09	7.88195e+09	0.0566487	0.967701	0.502514	0.635924	-0.047366	0.653074
O00299	6	6	654.31	0.613314	1.04325	Condition 2	Condition 1	Chloride intracellular channel protein 1 OS=Homo sapiens GN=CLIC1 PE=1 SV=4	2.78559e+08	3.25004e+08	3.60501e+08	3.21354e+08	0.127874	3.16892e+08	3.61342e+08	3.27522e+08	3.35252e+08	0.069235	1.04325	0.48376	0.636886	0.0610793	0.650892
Q12792	1	1	48.63	0.699426	1.15499	Condition 1	Condition 2	Twinfilin-1 OS=Homo sapiens GN=TWF1 PE=1 SV=3	4.45276e+06	4.38258e+06	8.65396e+06	5.82976e+06	0.419584	4.59937e+06	6.2675e+06	4.27546e+06	5.04744e+06	0.211778	0.865806	0.320698	0.63844	-0.207885	0.647378
Q9BRA2	1	1	32.55	0.692425	1.09649	Condition 1	Condition 2	Thioredoxin domain-containing protein 17 OS=Homo sapiens GN=TXNDC17 PE=1 SV=1	1.03951e+07	1.52914e+07	1.74897e+07	1.43921e+07	0.252347	1.09554e+07	1.27514e+07	1.56701e+07	1.31256e+07	0.181289	0.912003	0.600693	0.639979	-0.132889	0.643904
P22105	3	3	80.26	0.623531	1.05473	Condition 2	Condition 1	Tenascin-X OS=Homo sapiens GN=TNXB PE=1 SV=3	2.55671e+07	2.02219e+07	2.74411e+07	2.441e+07	0.153466	2.33632e+07	2.8595e+07	2.52797e+07	2.57459e+07	0.102808	1.05473	0.665992	0.640461	0.0768714	0.642817
P28074	1	1	19.5	0.629701	1.02643	Condition 2	Condition 1	Proteasome subunit beta type-5 OS=Homo sapiens GN=PSMB5 PE=1 SV=3	1.13705e+08	1.17814e+08	1.30848e+08	1.20789e+08	0.0740969	1.17878e+08	1.23308e+08	1.30756e+08	1.23981e+08	0.0521463	1.02643	0.685766	0.642833	0.0376318	0.637484
Q9ULZ3	1	1	19.97	0.689898	1.13967	Condition 2	Condition 1	Apoptosis-associated speck-like protein containing a CARD OS=Homo sapiens GN=PYCARD PE=1 SV=2	290273	185353	203011	226212	0.248335	360761	176648	236010	257807	0.364506	1.13967	0.526555	0.64344	0.188611	0.636122
P46108	2	2	71.82	0.701731	1.04861	Condition 1	Condition 2	Adapter molecule crk OS=Homo sapiens GN=CRK PE=1 SV=2	1.91455e+07	2.35663e+07	2.62782e+07	2.29967e+07	0.15656	2.19475e+07	2.09588e+07	2.28854e+07	2.19306e+07	0.0439296	0.953643	0.133636	0.646279	-0.0684794	0.629771
Q27J81	2	2	69.8	0.724854	1.06478	Condition 1	Condition 2	Inverted formin-2 OS=Homo sapiens GN=INF2 PE=1 SV=2	2.05088e+07	2.64481e+07	3.15348e+07	2.61639e+07	0.210919	2.53777e+07	2.35093e+07	2.48296e+07	2.45722e+07	0.0390863	0.939165	0.0587994	0.648383	-0.0905499	0.625081
Q9UN36	1	1	22.39	0.499176	1.20398	Condition 1	Condition 2	Protein NDRG2 OS=Homo sapiens GN=NDRG2 PE=1 SV=2	1.35399e+07	1.70195e+07	1.20532e+07	1.42042e+07	0.179448	1.71148e+07	1.58688e+07	2.4094e+06	1.17976e+07	0.69118	0.830576	0.178024	0.651163	-0.267816	0.618909
Q15149	24	24	957.14	0.654934	1.022	Condition 2	Condition 1	Plectin OS=Homo sapiens GN=PLEC PE=1 SV=3	2.1894e+08	2.30441e+08	2.41816e+08	2.30399e+08	0.0496444	2.50618e+08	2.23163e+08	2.32621e+08	2.35468e+08	0.059232	1.022	0.804222	0.651909	0.0313961	0.617258
P14317	1	1	18.44	0.6794	1.21526	Condition 1	Condition 2	Hematopoietic lineage cell-specific protein OS=Homo sapiens GN=HCLS1 PE=1 SV=3	2.2722e+06	6.28823e+06	6.05953e+06	4.87332e+06	0.462833	1.59712e+06	5.3033e+06	5.1299e+06	4.01011e+06	0.521558	0.822869	0.924638	0.65235	-0.281265	0.616282
Q9Y303	1	1	23.9	0.50836	1.1778	Condition 2	Condition 1	Putative N-acetylglucosamine-6-phosphate deacetylase OS=Homo sapiens GN=AMDHD2 PE=2 SV=2	478045	1.40766e+06	2.12162e+06	1.33577e+06	0.616976	1.64479e+06	1.33066e+06	1.74436e+06	1.57327e+06	0.137247	1.1778	0.128471	0.654446	0.236092	0.611653
Q16775	1	1	35.47	0.70129	1.03748	Condition 1	Condition 2	Hydroxyacylglutathione hydrolase, mitochondrial OS=Homo sapiens GN=HAGH PE=1 SV=2	7.23055e+06	8.46921e+06	9.34969e+06	8.34982e+06	0.1275	7.94666e+06	7.90623e+06	8.29172e+06	8.0482e+06	0.0263237	0.963878	0.0761864	0.655467	-0.0530779	0.609406
P62873	6	1	279.58	0.582431	1.1015	Condition 2	Condition 1	Guanine nucleotide-binding protein G(I)/G(S)/G(T) subunit beta-1 OS=Homo sapiens GN=GNB1 PE=1 SV=3	1.01681e+07	2.03274e+07	2.13039e+07	1.72665e+07	0.357151	1.79646e+07	1.80807e+07	2.1012e+07	1.90191e+07	0.0907977	1.1015	0.145432	0.660203	0.139474	0.599019
Q96AD5	1	1	99.77	0.609603	1.071	Condition 2	Condition 1	Patatin-like phospholipase domain-containing protein 2 OS=Homo sapiens GN=PNPLA2 PE=1 SV=1	4.68033e+06	7.03909e+06	7.71657e+06	6.47866e+06	0.246011	6.30991e+06	7.17027e+06	7.33573e+06	6.93864e+06	0.0793735	1.071	0.213336	0.661227	0.0989555	0.596782
O94973	1	1	16.56	0.627587	1.06931	Condition 2	Condition 1	AP-2 complex subunit alpha-2 OS=Homo sapiens GN=AP2A2 PE=1 SV=2	3.37092e+06	2.90722e+06	4.42498e+06	3.5677e+06	0.218005	3.88506e+06	3.27886e+06	4.28106e+06	3.81499e+06	0.13231	1.06931	0.592713	0.668134	0.0966837	0.581791
O95202	1	1	38.33	0.842383	1.12396	Condition 1	Condition 2	LETM1 and EF-hand domain-containing protein 1, mitochondrial OS=Homo sapiens GN=LETM1 PE=1 SV=1	6.20803e+06	1.34415e+07	1.37746e+07	1.11414e+07	0.383764	9.94727e+06	9.50751e+06	1.0283e+07	9.91259e+06	0.0392339	0.889709	0.0164112	0.668493	-0.168595	0.581016
P28070	1	1	155.82	0.618009	1.05789	Condition 2	Condition 1	Proteasome subunit beta type-4 OS=Homo sapiens GN=PSMB4 PE=1 SV=4	8.39483e+06	1.11976e+07	1.28201e+07	1.08042e+07	0.207207	1.2214e+07	1.08045e+07	1.12703e+07	1.14296e+07	0.0628305	1.05789	0.186597	0.668915	0.0811848	0.580105
Q6IBS0	1	1	62.3	0.68916	1.09172	Condition 1	Condition 2	Twinfilin-2 OS=Homo sapiens GN=TWF2 PE=1 SV=2	2.89756e+06	3.26524e+06	4.66475e+06	3.60918e+06	0.258354	2.55077e+06	3.55136e+06	3.81574e+06	3.30596e+06	0.201828	0.915985	0.67729	0.670693	-0.126603	0.576276
P62249	2	2	100.9	0.666777	1.04482	Condition 2	Condition 1	40S ribosomal protein S16 OS=Homo sapiens GN=RPS16 PE=1 SV=2	2.15721e+07	2.37378e+07	2.72339e+07	2.41813e+07	0.118142	2.39673e+07	2.31503e+07	2.86777e+07	2.52651e+07	0.118087	1.04482	0.956647	0.67306	0.063257	0.571192
O95197	1	1	24.03	0.6468	1.0366	Condition 1	Condition 2	Reticulon-3 OS=Homo sapiens GN=RTN3 PE=1 SV=2	6.50807e+07	6.10206e+07	6.25406e+07	6.28806e+07	0.032622	5.09886e+07	6.60531e+07	6.49398e+07	6.06605e+07	0.138386	0.964693	0.112694	0.679346	-0.0518586	0.557781
O14880	1	1	16.72	0.751121	1.06196	Condition 1	Condition 2	Microsomal glutathione S-transferase 3 OS=Homo sapiens GN=MGST3 PE=1 SV=1	1.62855e+07	2.52195e+07	2.15866e+07	2.10305e+07	0.213634	2.1527e+07	1.96399e+07	1.82435e+07	1.98035e+07	0.0832112	0.941653	0.237147	0.679922	-0.0867333	0.55656
P04075	15	12	1367.21	0.651742	1.02062	Condition 2	Condition 1	Fructose-bisphosphate aldolase A OS=Homo sapiens GN=ALDOA PE=1 SV=2	2.04624e+09	1.9641e+09	2.28252e+09	2.09762e+09	0.0788077	2.14991e+09	2.10125e+09	2.17146e+09	2.14087e+09	0.016801	1.02062	0.0904072	0.680795	0.0294447	0.554708
Q68DE3	1	1	14.39	0.632838	1.08425	Condition 1	Condition 2	Basic helix-loop-helix domain-containing protein KIAA2018 OS=Homo sapiens GN=KIAA2018 PE=1 SV=3	1.12248e+07	1.0606e+07	1.4353e+07	1.20612e+07	0.166539	7.86476e+06	1.15229e+07	1.39845e+07	1.1124e+07	0.276814	0.922297	0.596998	0.681652	-0.116697	0.552892
Q8IVI9	1	1	21.27	0.600775	1.08844	Condition 2	Condition 1	Nostrin OS=Homo sapiens GN=NOSTRIN PE=1 SV=2	6.42918e+06	1.10883e+07	1.3184e+07	1.02338e+07	0.337854	1.22659e+07	1.07033e+07	1.04477e+07	1.11389e+07	0.0883629	1.08844	0.149928	0.685278	0.122265	0.545239
P07602	3	3	163.21	0.686151	1.03513	Condition 1	Condition 2	Proactivator polypeptide OS=Homo sapiens GN=PSAP PE=1 SV=2	1.04127e+08	1.04407e+08	1.24107e+08	1.1088e+08	0.103312	9.87429e+07	1.04879e+08	1.17731e+08	1.07118e+08	0.0904615	0.966065	0.834192	0.686423	-0.0498084	0.54283
Q9Y5X3	1	1	23.23	0.707236	1.02208	Condition 1	Condition 2	Sorting nexin-5 OS=Homo sapiens GN=SNX5 PE=1 SV=1	9.36523e+06	8.8577e+06	1.03373e+07	9.52009e+06	0.0789776	9.43338e+06	8.91886e+06	9.59103e+06	9.31442e+06	0.0377391	0.978396	0.358741	0.689888	-0.0315089	0.535566
P02100	3	1	169.86	0.687918	1.03418	Condition 2	Condition 1	Hemoglobin subunit epsilon OS=Homo sapiens GN=HBE1 PE=1 SV=2	2.27323e+07	2.44263e+07	2.77186e+07	2.49591e+07	0.101586	2.60335e+07	2.33331e+07	2.80698e+07	2.58121e+07	0.0920521	1.03418	0.93515	0.692554	0.0484857	0.530002
P61088	2	1	62.79	0.395243	1.22897	Condition 2	Condition 1	Ubiquitin-conjugating enzyme E2 N OS=Homo sapiens GN=UBE2N PE=1 SV=1	223.537	4.18757e+07	5.05624e+07	3.08128e+07	0.877416	3.74623e+07	3.48452e+07	4.12966e+07	3.7868e+07	0.0856876	1.22897	0.0284006	0.696441	0.297452	0.521927
P62826	3	3	103.66	0.724065	1.03237	Condition 2	Condition 1	GTP-binding nuclear protein Ran OS=Homo sapiens GN=RAN PE=1 SV=3	1.40125e+08	1.2248e+08	1.32993e+08	1.31866e+08	0.067312	1.49715e+08	1.19622e+08	1.39068e+08	1.36135e+08	0.112091	1.03237	0.505627	0.696827	0.045967	0.521128
Q9C073	1	1	15.55	0.651691	1.07455	Condition 2	Condition 1	Protein FAM117A OS=Homo sapiens GN=FAM117A PE=2 SV=1	1.35384e+08	1.98524e+08	2.32059e+08	1.88656e+08	0.260193	2.3721e+08	1.94587e+08	1.76362e+08	2.02719e+08	0.154048	1.07455	0.576242	0.69694	0.10373	0.520894
[truncated: 121 more rows]
